# Supplementary material for: Mutant SF3B1 promotes malignancy in PDAC
Source: eLife journal article supplement (doi:10.7554/elife.80683), 2023-10-12
Supplement: supp [file elife-80683-supp-v2.zip]

# **Mutant SF3B1 promotes PDAC malignancy through TGF- $\beta$ resistance**

Uncropped agarose gel and western blot images

**Related to Fig. 4E: Map3k7 isoform RT-PCR**

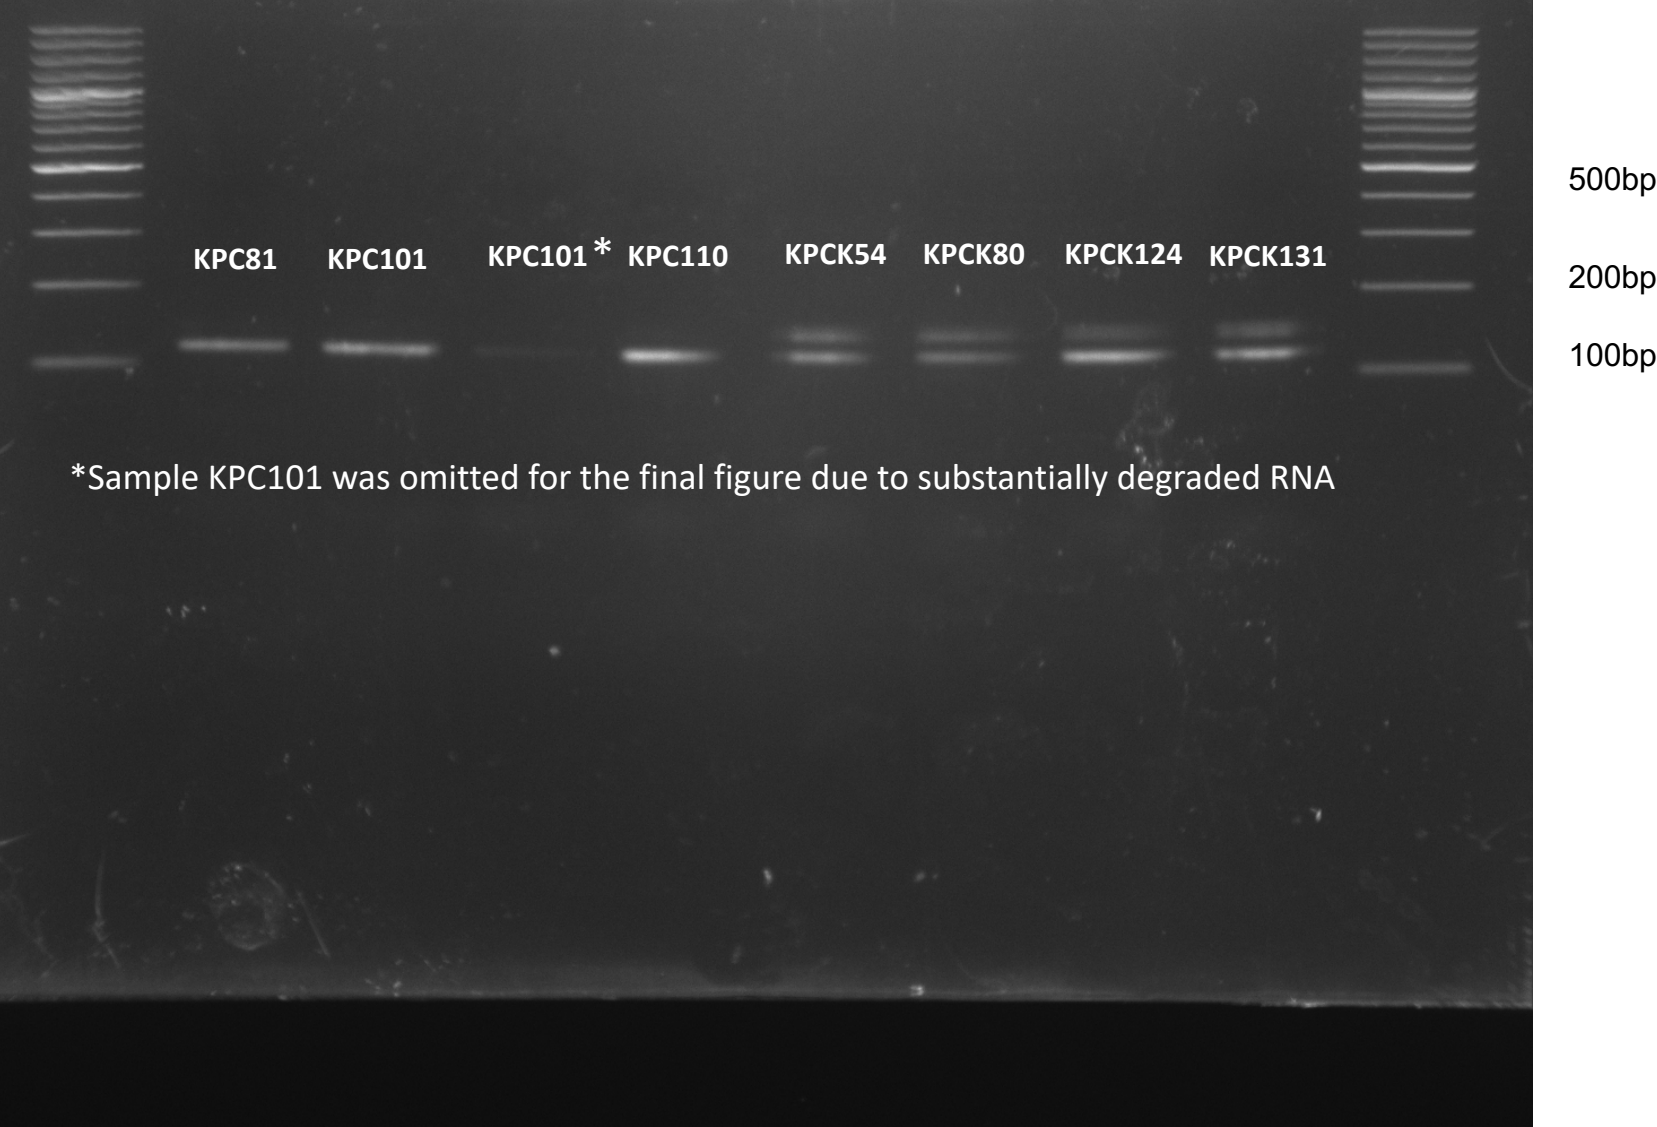

\*Sample KPC101 was omitted for the final figure due to substantially degraded RNA

Map3k7 canonical isoform: 114 bp  
Map3k7 non-canonical isoform: 137 bp  
GeneRuler 100 bp Plus DNA Ladder

Related to Fig. 4F: MAP3K7 isoform RT-PCR

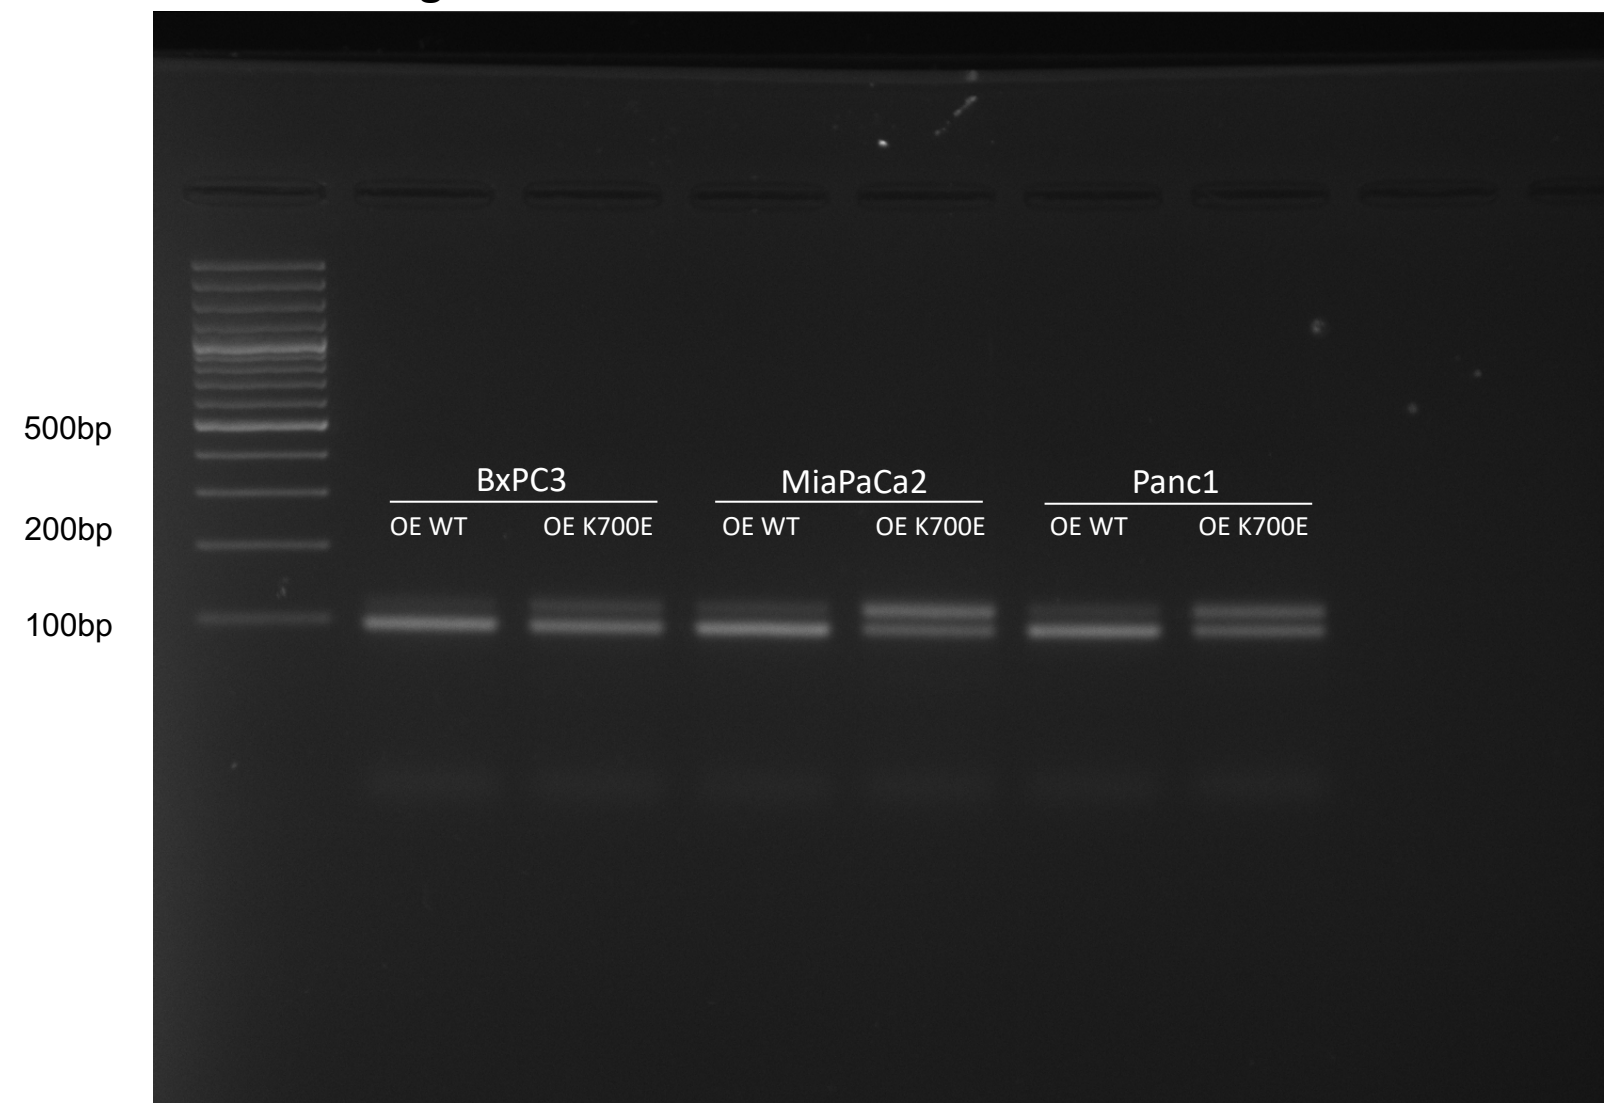

MAP3K7 canonical isoform: 94 bp  
MAP3K7 non-canonical isoform: 114 bp  
GeneRuler 100 bp Plus DNA Ladder

## Related to Fig. 4F: Map3k7 isoform RT-PCR

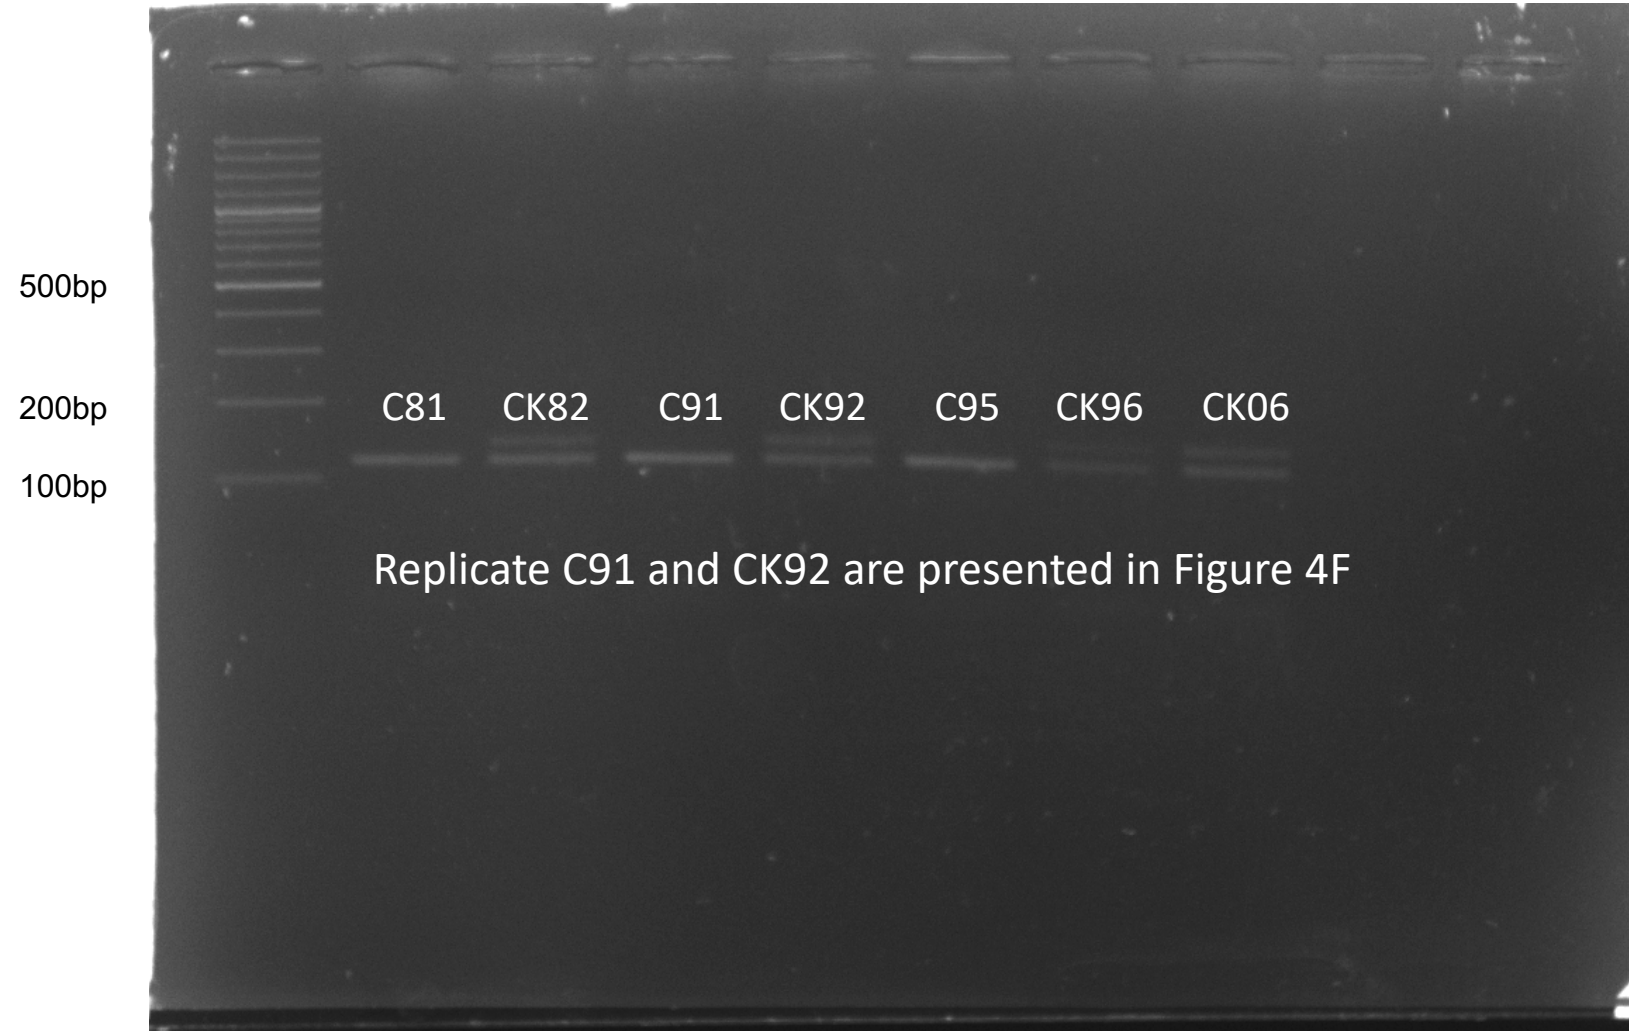

Map3k7 canonical isoform: 114 bp  
Map3k7 non-canonical isoform: 137 bp  
GeneRuler 100 bp Plus DNA Ladder



## Related to Fig. 4E: MAP3K7 isoform RT-PCR

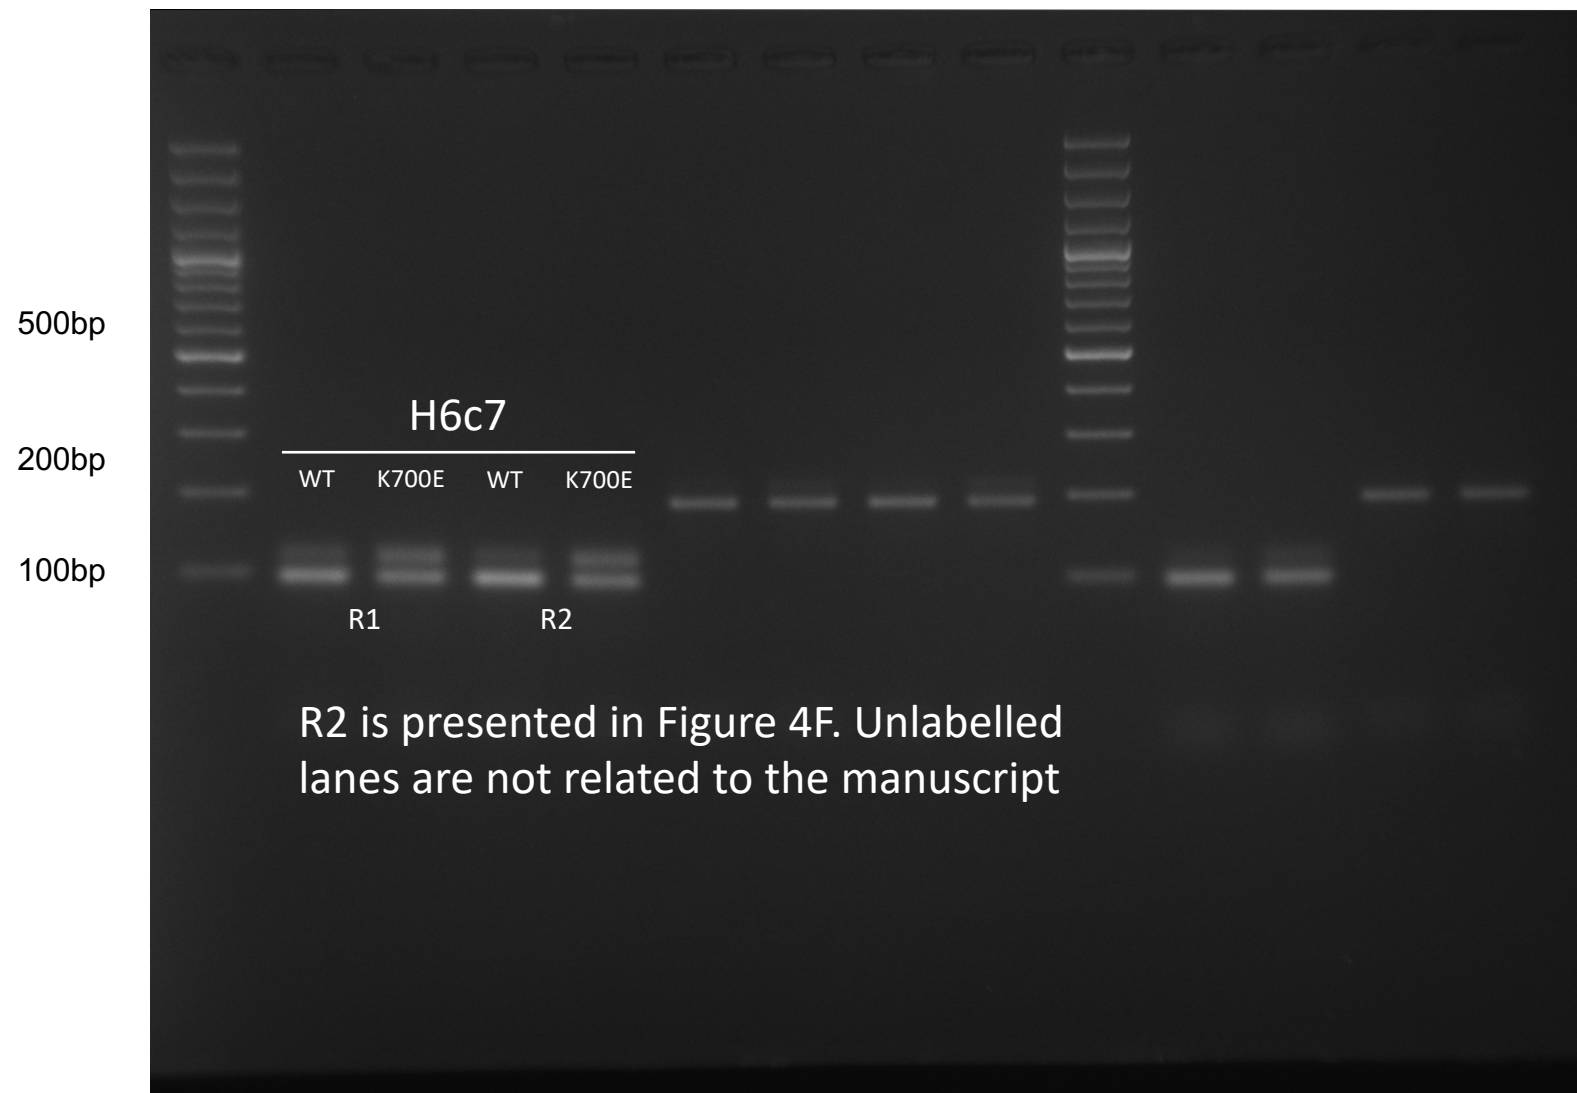

Map3k7 canonical isoform: 94 bp  
Map3k7 non-canonical isoform: 114 bp  
GeneRuler 100 bp Plus DNA Ladder

Related to Fig. 4E: MAP3K7 isoform RT-PCR

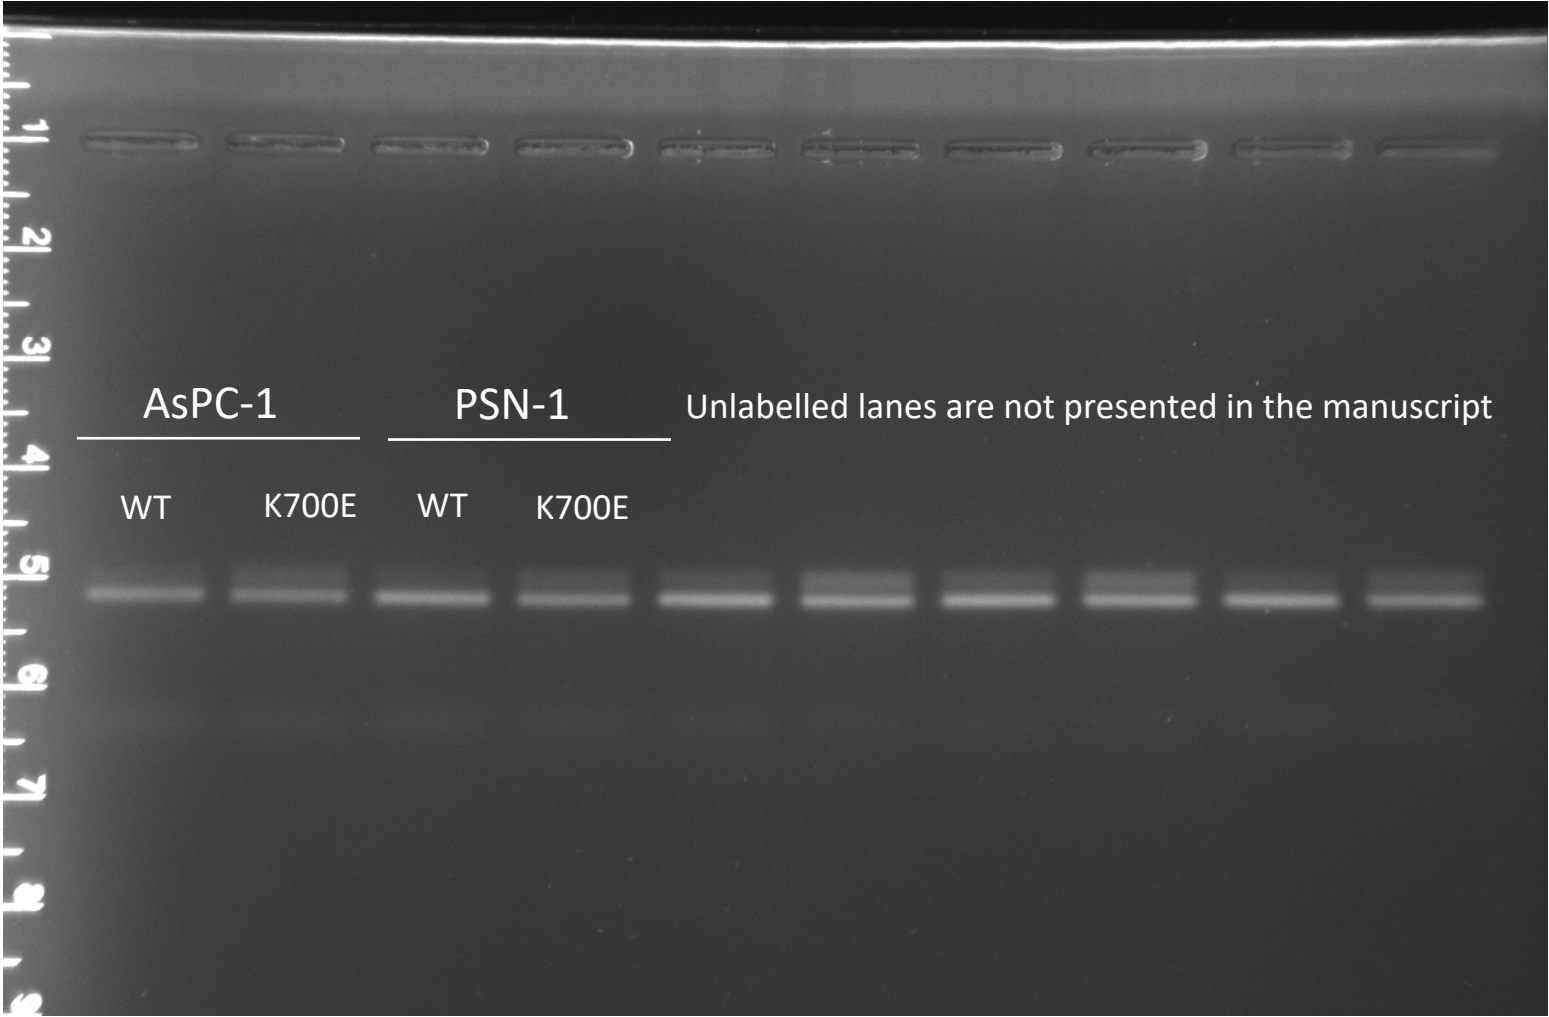

Map3k7 canonical isoform: 94 bp  
Map3k7 non-canonical isoform: 114 bp

Related to Suppl. Fig. 4F: Ppp2r5a isoform RT-PCR

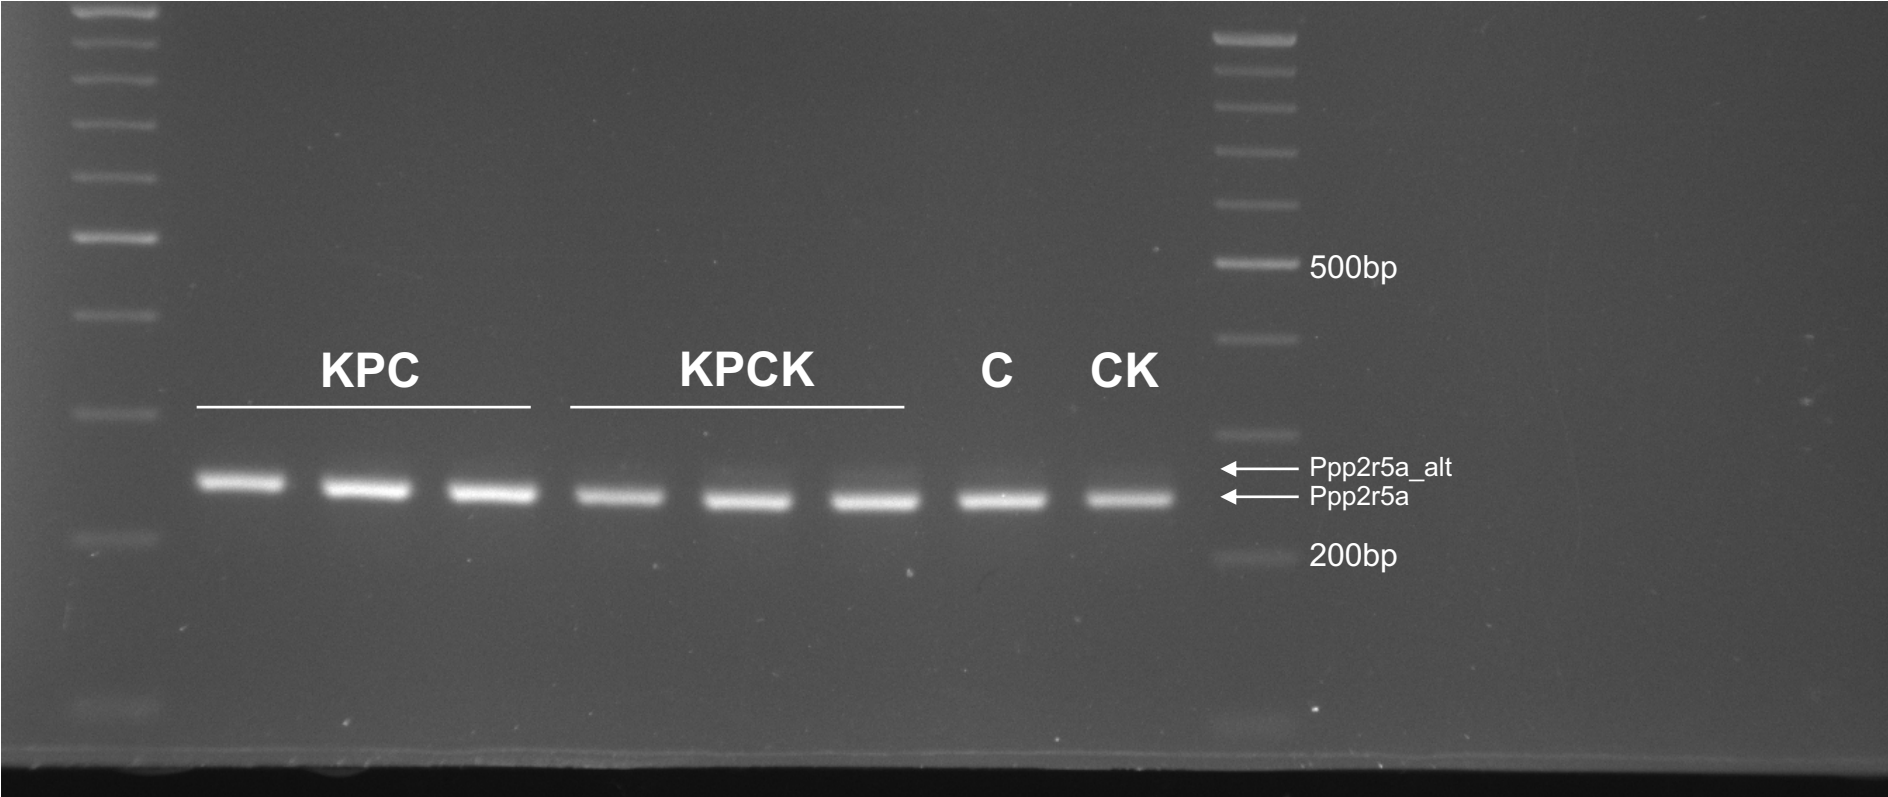

GeneRuler 100 bp Plus DNA Ladder

**Related to Suppl. Fig. 4G: Western Blot for MAP3K7**

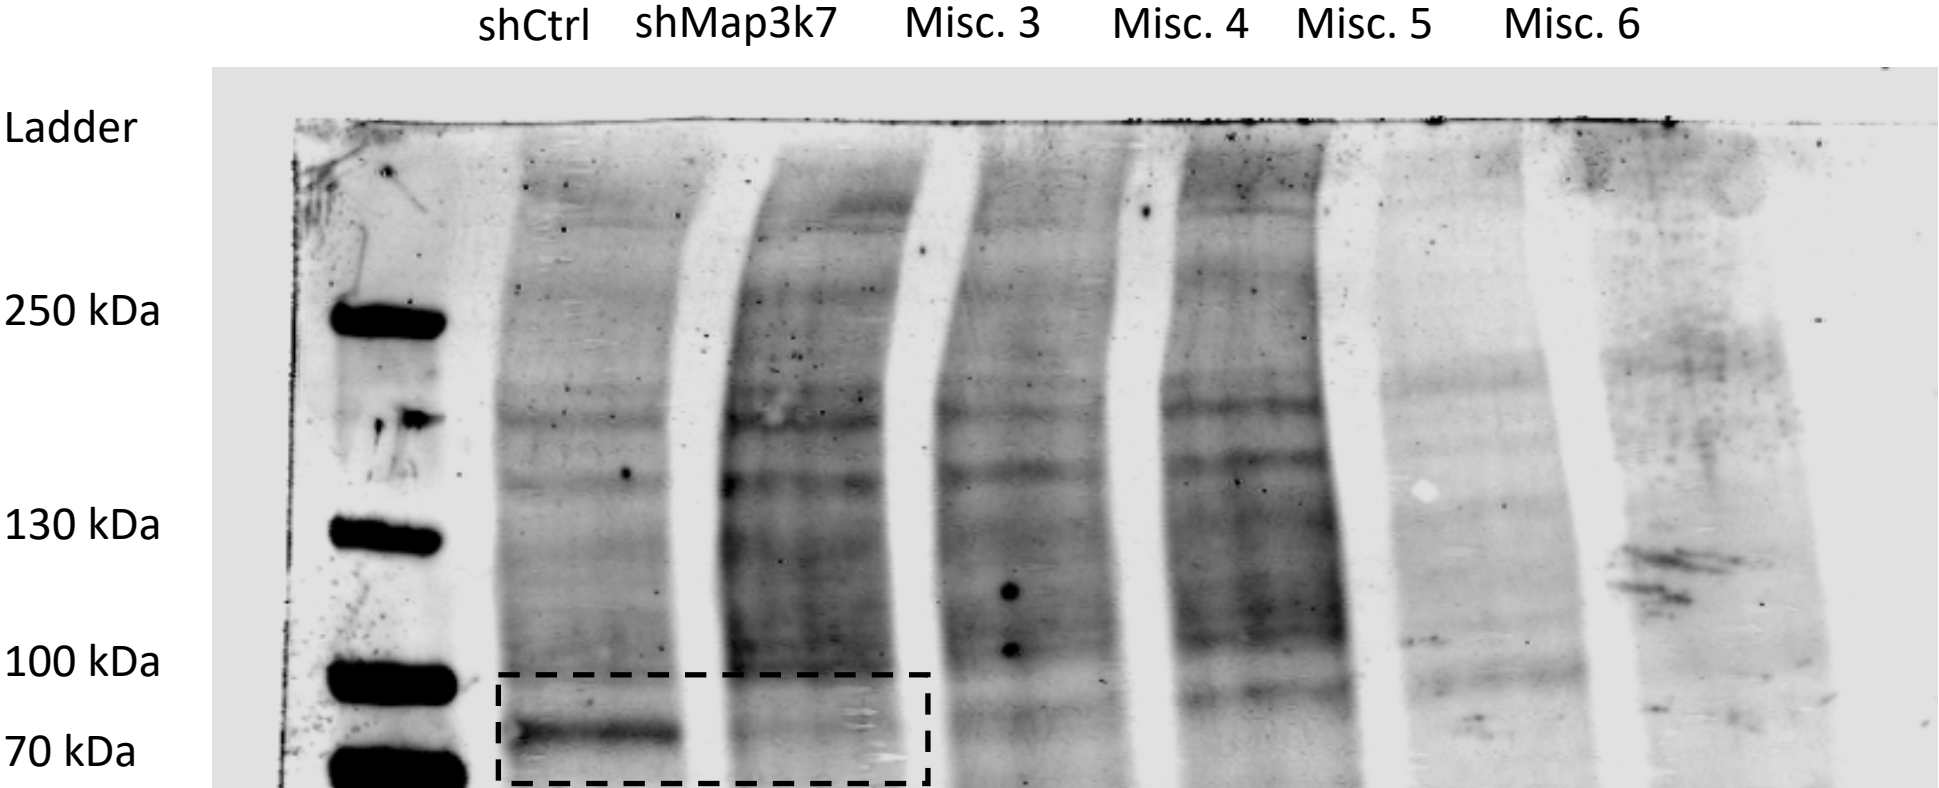

Expected Molecular Weight MAP3K7: 78 to 82 kDa

Dotted line indicates cropped gel image presented in the manuscript  
Misc. 3-6 are samples not related to the manuscript

## Related to Suppl. Fig. 4G: Western Blot for GAPDH

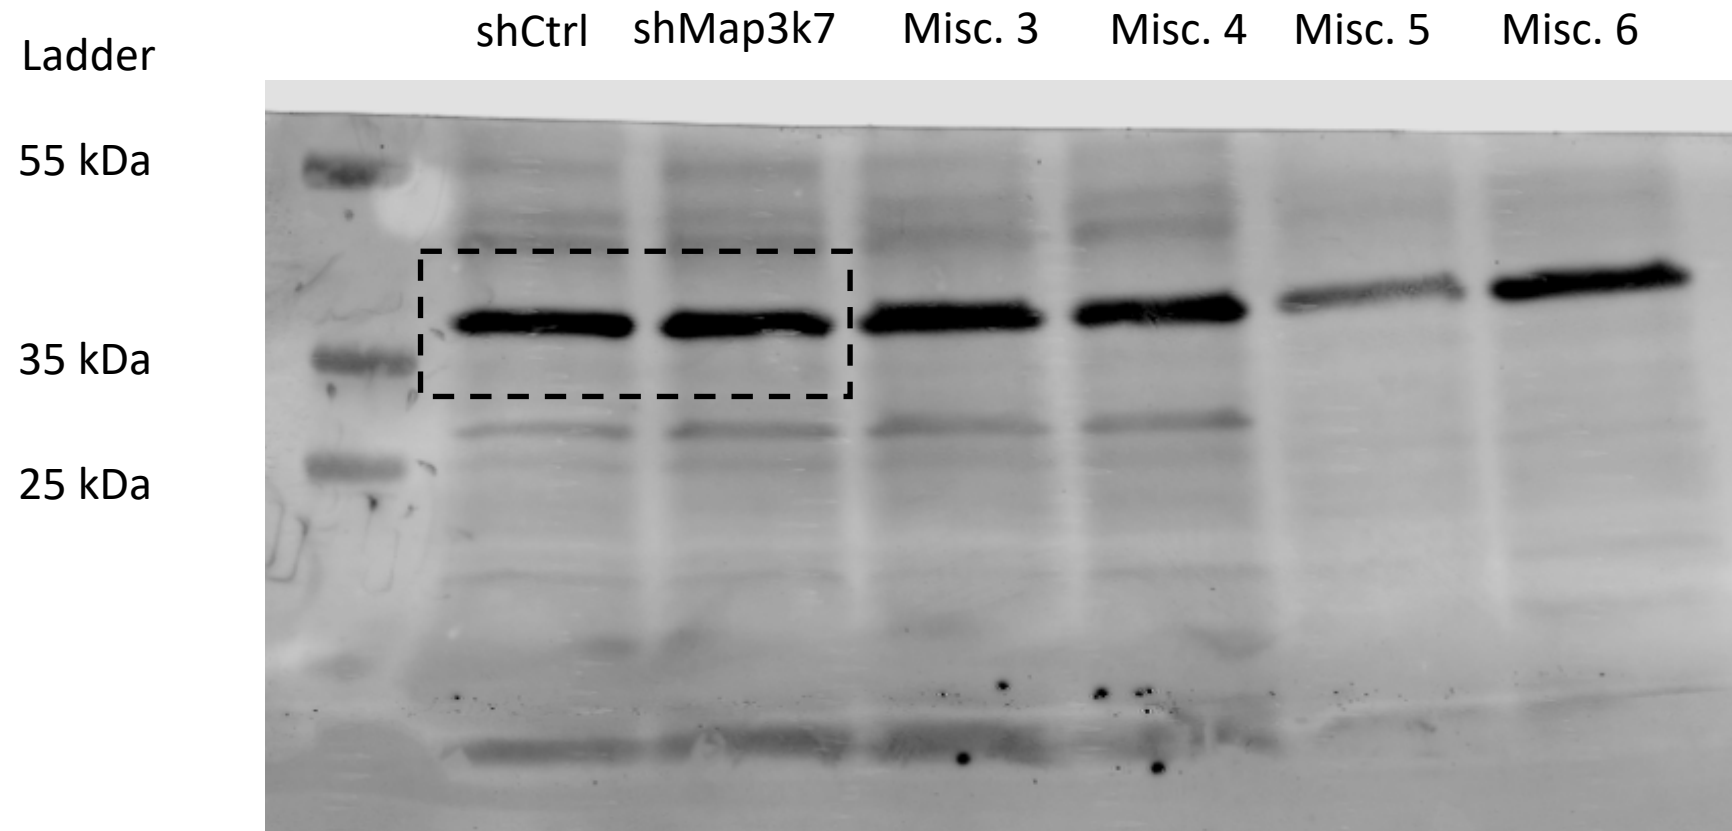

Expected Molecular Weight GAPDH: 36 kDa

Dotted line indicates cropped gel image presented in the manuscript

Misc. 3-6 are samples not related to the manuscript

# Related to Fig. 5D: Western Blot for MAP3K7 and GAPDH (short exposure)

Ladder

250 kDa

130 kDa

100 kDa

70 kDa

55 kDa

35 kDa

25 kDa

15 kDa

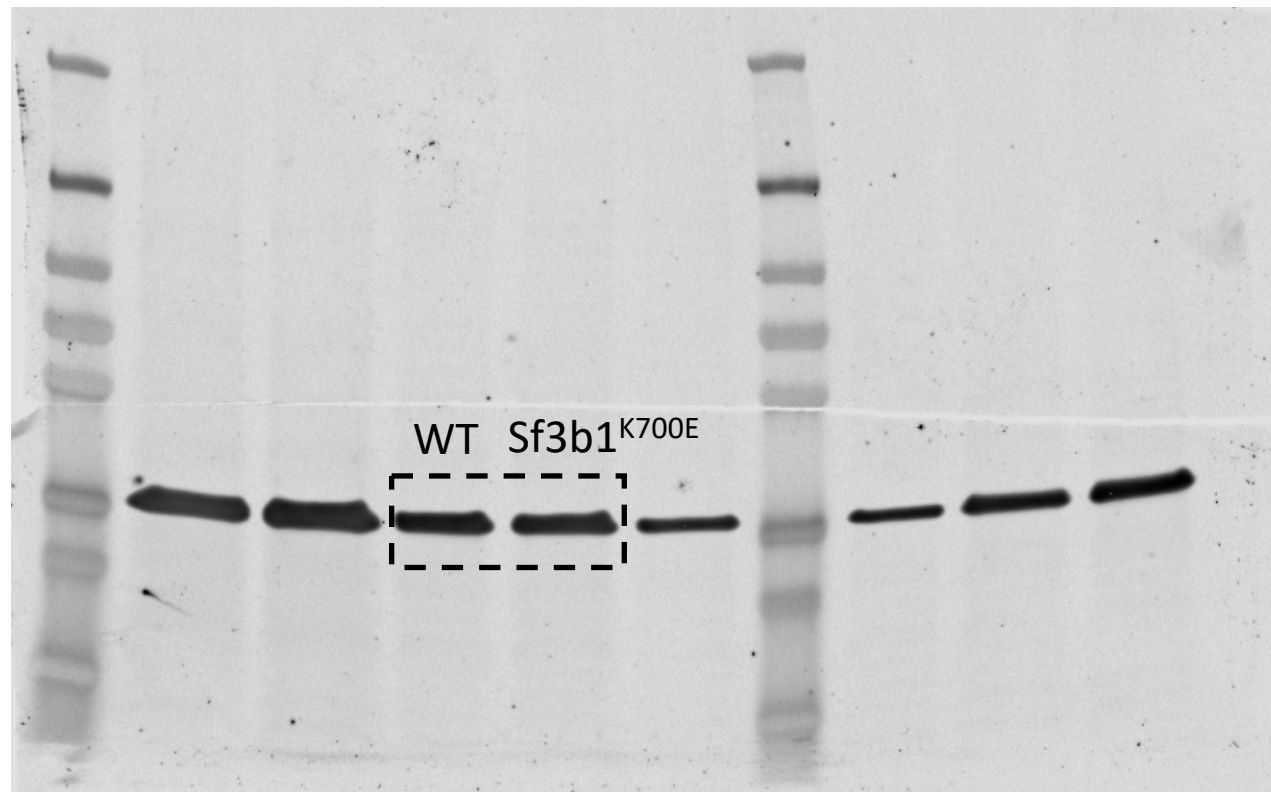

Expected Molecular Weight GAPDH: 36 kDa

Dotted line indicates cropped gel image presented in the manuscript

Unlabelled samples are not presented in the manuscript

## Related to Fig. 5D: Western Blot for MAP3K7 and GAPDH (long exposure)

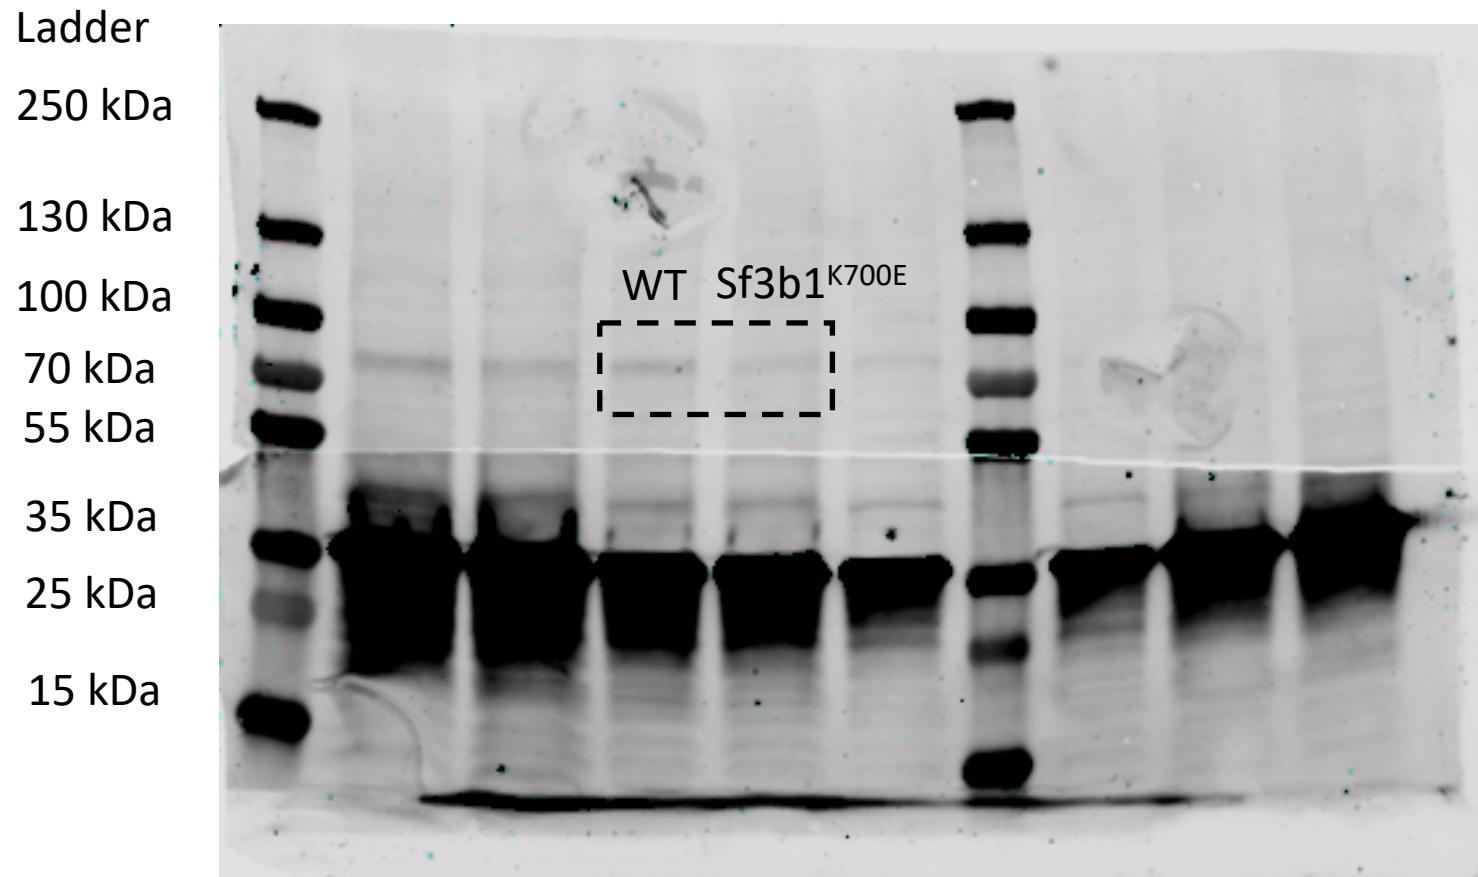

Expected Molecular Weight GAPDH: 36 kDa; MAP3K7: 78-82 kDa

Dotted line indicates cropped gel image presented in the manuscript

Unlabelled samples are not presented in the manuscript

## Related to Fig. 5D: Western Blot for MAP3K7

Ladder

250 kDa

130 kDa

100 kDa

70 kDa

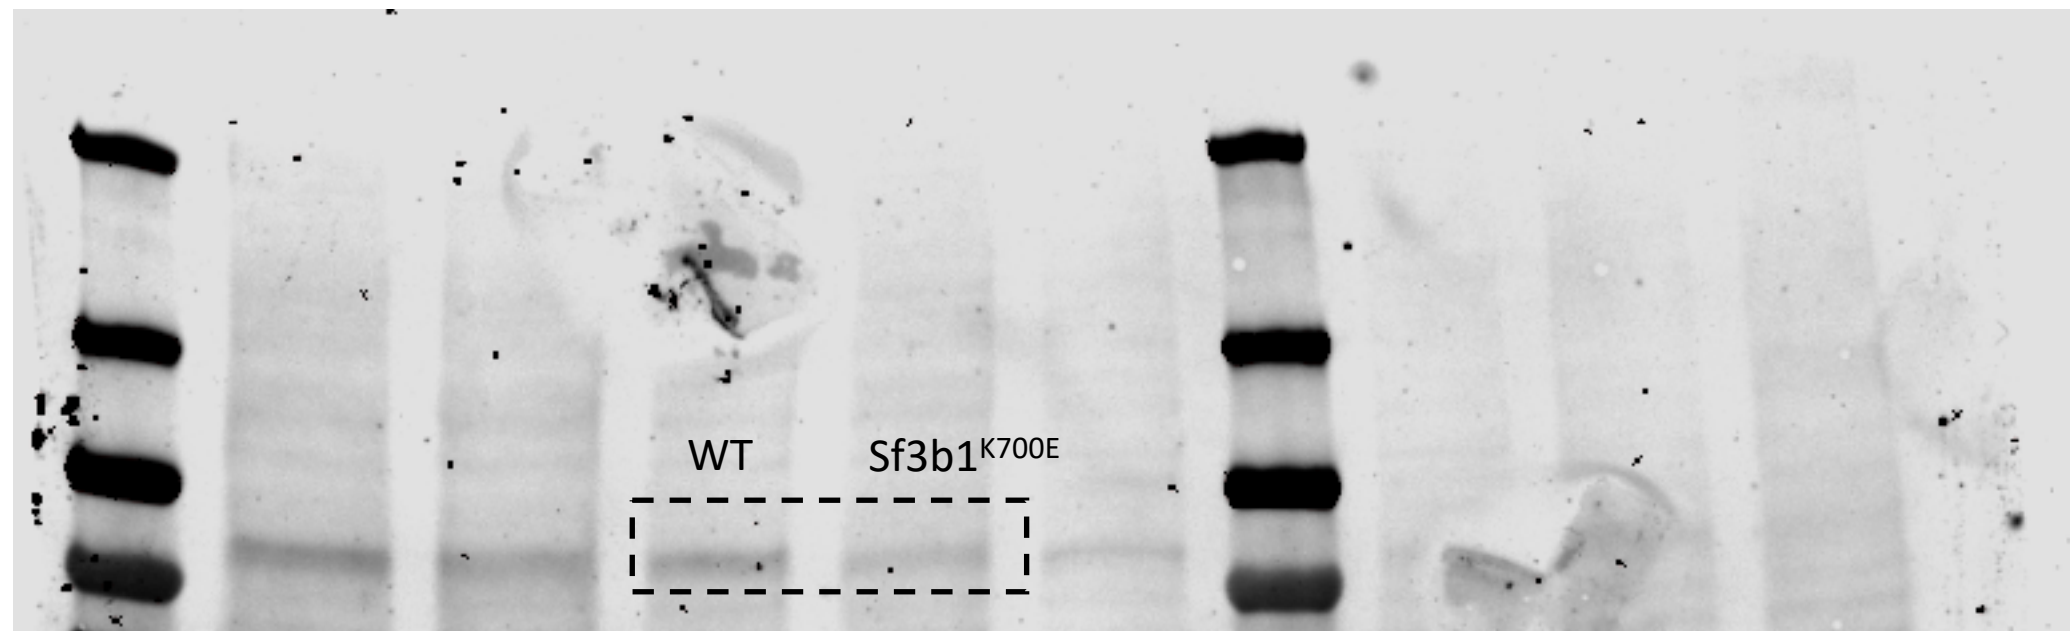

Expected Molecular Weight MAP3K7: 78 to 82 kDa

Dotted line indicates cropped gel image presented in the manuscript

Unlabelled samples are not presented in the manuscript
