# Supplementary material for: Mutant SF3B1 promotes malignancy in PDAC
Source: eLife. 2023 Oct 12;12:e80683. doi: 10.7554/eLife.80683 (PMC10629822; doi:10.7554/eLife.80683)
Supplement: Supplementary file 1. [file elife-80683-supp1.xlsx]

## Sheet: Sheet1
Gene	logFC	logCPM	PValue	FDR	EntrezID
Tnc	-3.58874	10.9802	1.93417e-14	2.87613e-11	21923
Col5a3	-3.46092	5.48888	1.02802e-21	6.8507e-18	53867
Lum	-3.3916	0.00133653	0.000663994	0.0177705	17022
Mmp12	-3.23994	0.713307	5.28675e-05	0.00263573	17381
Tmprss11e	-3.12732	3.67794	2.26183e-17	5.02427e-14	243084
Trdv4	-3.04489	1.57057	1.47681e-07	2.2711e-05	100114901
Gm10439	-3.03509	-1.94586	0.0010749	0.0255219	382243
Sbpl	-3.03183	-1.78466	0.000553382	0.0155601	638345
Crlf1	-2.97098	4.7004	2.44778e-15	4.07801e-12	12931
Fzd10os	-2.86049	0.128802	3.9544e-05	0.00212517	319616
Col3a1	-2.83979	5.73767	1.26211e-05	0.000835503	12825
Mmp10	-2.82197	2.04157	5.40886e-12	4.00496e-09	17384
Krtap4-6	-2.81359	-1.58289	0.00951489	0.120458	68768
Srpx2	-2.80098	1.75229	8.64915e-10	3.39047e-07	68792
LOC100861727	-2.79909	-1.29663	0.000619833	0.0168594	100861727
Itgb3	-2.79599	6.25218	3.47804e-16	6.9533e-13	16416
Gm10352	-2.75876	0.00771738	0.206914	0.624532	100042881
Fzd10	-2.73861	0.453865	2.17576e-06	0.000205179	93897
Calm4	-2.68137	-1.75697	0.0358439	0.280796	80796
Gm3376	-2.67629	-0.568491	0.209108	0.626198	100041505
Il2rg	-2.63507	-0.276292	0.000376096	0.0115676	16186
Sfrp1	-2.62277	2.46975	0.00041824	0.0125926	20377
Col1a1	-2.61316	6.1631	0.000291152	0.00956153	12842
Mmp9	-2.61223	1.32079	1.06471e-06	0.000114439	17395
Gm20767	-2.60554	-1.8184	0.00447946	0.0724731	639910
Esm1	-2.58807	-0.391876	0.00029872	0.00974228	71690
St8sia2	-2.57679	1.07273	0.00367764	0.0623607	20450
Igfbp4	-2.57541	8.51214	1.05389e-10	6.01981e-08	16010
Lrfn2	-2.56049	-1.28234	0.0464414	0.321788	70530
Zfp986	-2.55097	-0.830351	0.00040193	0.0121933	385211
D630029K05Rik	-2.5503	-1.28143	0.01698	0.177359	103175
9530059O14Rik	-2.52527	1.34052	3.38514e-10	1.57385e-07	319626
Iglon5	-2.49694	1.69867	3.9021e-09	1.09874e-06	210094
Grm1	-2.48709	-0.781987	0.0212815	0.204796	14816
8030451A03Rik	-2.4754	0.814552	2.67344e-08	5.29182e-06	100504061
Chrna1	-2.4497	1.71637	4.90974e-08	8.61013e-06	11435
Gja5	-2.44561	-0.83655	0.00246301	0.0463221	14613
Trbc1	-2.44261	1.85075	3.77935e-06	0.000320156	100125262
Rgr	-2.43908	-1.62552	0.0232863	0.217035	57811
2010300F17Rik	-2.42347	2.22069	2.09415e-06	0.000198418	69884
Gm20744	-2.41926	-1.0435	0.0251346	0.227012	434205
Zfp600	-2.40706	-0.482796	0.00547074	0.0834893	667666
Vmn2r40	-2.4025	-1.32987	0.0386994	0.294062	100042781
Loxl2	-2.4005	4.98461	2.25211e-08	4.64167e-06	94352
Ccl21a	-2.3599	-0.806456	0.0696107	0.397191	18829
Col1a2	-2.35748	5.30342	0.00146192	0.0319417	12843
Mir694	-2.3516	-0.430831	0.00033629	0.0106886	751558
Dnase2b	-2.3324	-1.25812	0.0153571	0.164975	56629
Vmn1r-ps79	-2.32263	-0.974371	0.00531384	0.0815306	100042966
Hoxb7	-2.31639	-0.922464	0.0131864	0.149531	15415
Gm20558	-2.30942	-1.37896	0.0353881	0.278975	330108
Rxfp3	-2.3024	-1.06112	0.0375469	0.288181	239336
Col7a1	-2.29198	7.46027	7.31201e-19	2.43636e-15	12836
Kpna7	-2.28748	-1.49369	0.0154402	0.165531	381686
Il27ra	-2.2873	-1.06922	0.00198467	0.0395984	50931
Dmrtc1c1	-2.27834	-1.26784	0.0680064	0.393512	71083
Ticam2	-2.27553	-1.67317	0.0115729	0.137289	225471
Lgr6	-2.27144	4.58388	1.3224e-09	4.89581e-07	329252
4833427F10Rik	-2.26462	0.66393	2.95285e-05	0.00166761	74601
Gzme	-2.26215	1.93666	1.20705e-08	2.7114e-06	14942
C1s2	-2.25705	-0.360879	0.002495	0.0467041	317677
1700110I01Rik	-2.24533	-0.231325	0.0421154	0.307176	73549
Tlx3	-2.2444	-1.65663	0.172667	0.58373	27140
Dmrtc1c2	-2.24057	-1.29364	0.0726112	0.406509	668357
Inhba	-2.23778	6.06935	1.78764e-07	2.66705e-05	16323
Magea2	-2.23618	-1.76975	0.0533871	0.34541	17138
Cyp4a30b	-2.23612	-1.38644	0.0110911	0.133494	435802
4932414J04Rik	-2.23509	-0.960852	0.0400297	0.299056	237694
Olfr701	-2.23446	-1.29525	0.0840037	0.434515	66786
Olfr766-ps1	-2.22608	-2.0449	0.207488	0.62517	546487
Gpr45	-2.22109	-1.25547	0.00774187	0.105289	93690
Fstl1	-2.21975	4.58029	1.2903e-05	0.000845758	14314
Ren1	-2.21816	-1.24741	0.0251824	0.227187	19701
Kcnn3	-2.21723	3.51953	7.26337e-06	0.000545899	140493
Ptpn7	-2.21672	-0.356351	0.00670447	0.0957366	320139
Ighg1	-2.2084	-0.69505	0.0232813	0.217035	16017
Gm19825	-2.20076	-0.690806	0.00722628	0.100815	100503674
Nlrp2	-2.19912	-1.51895	0.12146	0.515549	232827
Stra8	-2.19088	-1.15675	0.0206989	0.201958	20899
Slc5a4b	-2.18973	-1.15539	0.0144643	0.158276	64454
Tmco5	-2.18158	-1.15207	0.0474275	0.325161	67356
Gm3278	-2.18064	-1.33151	0.116964	0.505698	100041336
Gm9866	-2.18027	-1.81794	0.0637744	0.381308	636791
Rbmy	-2.17983	-0.826685	0.295683	0.708799	19657
Mmp2	-2.17775	2.36982	0.00123607	0.0282095	17390
Dntt	-2.17559	-1.29304	0.0142587	0.157073	21673
Ccbe1	-2.1676	6.21564	1.40802e-12	1.17288e-09	320924
Gabra3	-2.15902	-1.52451	0.00768752	0.104979	14396
Odaph	-2.15711	4.8239	1.96538e-19	7.85839e-16	381651
Ccer1	-2.15228	-1.08398	0.0253488	0.228174	66716
Slamf6	-2.14544	-1.17492	0.0433087	0.310667	30925
2610028E06Rik	-2.14349	-1.03396	0.0140673	0.155879	72395
Irx5	-2.14261	1.10662	0.000128531	0.00530907	54352
Scrt1	-2.13538	-1.50876	0.0391198	0.296132	170729
Nkx2-3	-2.13373	-0.608644	0.0152455	0.164129	18089
Prss43	-2.1334	-0.602026	0.0186772	0.188583	272643
Gm6523	-2.13267	-0.715486	0.0198655	0.196093	624698
1700125H03Rik	-2.12929	-0.469404	0.0032829	0.0573704	73609
1700044C05Rik	-2.12438	-1.56834	0.167262	0.576934	73306
Six1	-2.1222	-1.25228	0.0173988	0.180437	20471
Fcgr2b	-2.12192	1.77756	1.13044e-05	0.000773964	14130
Dnmt3l	-2.11452	-1.04229	0.0479266	0.326679	54427
Cyp4a12b	-2.11137	-1.26978	0.0499157	0.333305	13118
Adgrg5	-2.11053	-0.961601	0.00918476	0.11748	382045
Vmn2r35	-2.10704	-1.26264	0.0867093	0.441077	625353
Dkk2	-2.10499	3.49317	1.03662e-06	0.000112631	56811
Bmpr1b	-2.10203	0.845089	4.05592e-05	0.00214513	12167
Slco6b1	-2.0966	-1.30197	0.0183412	0.18613	67854
Vmn2r41	-2.09184	-1.68878	0.11454	0.501178	100042848
Gm20242	-2.0853	-0.740879	0.00283814	0.0515819	100504469
Cma2	-2.08419	-0.977297	0.012301	0.142526	545055
Gata2	-2.08277	-0.0880097	0.000370881	0.0115061	14461
Gm10556	-2.07892	-1.54452	0.0721399	0.405802	100038439
Car10	-2.07426	-1.10512	0.0971115	0.464981	72605
Gm20750	-2.07414	-1.18874	0.0427424	0.309155	622124
Olfr1335	-2.07347	-2.13646	0.242409	0.660816	435804
Lama1	-2.07179	1.87488	3.89271e-05	0.00209766	16772
Vmn1r243	-2.07138	-1.18088	0.0551354	0.353177	100042964
Kcnk12	-2.06843	0.0940318	0.0107457	0.130595	210741
Cmklr1	-2.06637	-0.246072	0.0141454	0.156413	14747
Bach2os	-2.063	-1.2003	0.00546556	0.083474	414068
4930597G03Rik	-2.06272	-1.24245	0.0381378	0.291457	75377
Klf14	-2.06263	-1.68778	0.132955	0.529382	619665
Lao1	-2.05953	-1.12469	0.0757023	0.415552	100470
Adam19	-2.05615	0.986796	0.0200671	0.197604	11492
P2ry12	-2.05597	-1.50433	0.0156418	0.167225	70839
Gm10220	-2.04891	0.155476	0.00921488	0.117703	434689
Fam47e	-2.04888	-1.31718	0.00917961	0.11748	384198
Fgb	-2.04687	-1.45887	0.0276143	0.240289	110135
Serpinf1	-2.04388	0.873486	0.00888634	0.115137	20317
Gm14819	-2.0433	-0.783249	0.0733288	0.408238	100039585
Cd200r3	-2.04297	-1.41124	0.126113	0.520412	74603
Hoxd4	-2.04103	-1.78218	0.0779836	0.420933	15436
Thy1	-2.03892	0.41969	0.00846653	0.111284	21838
Vmn2r89	-2.03762	-2.07108	0.0672084	0.390631	22301
Tmem179	-2.03589	-1.71972	0.0673152	0.391097	104885
Csf2	-2.02576	6.43611	8.47261e-14	9.96379e-11	12981
Nanog	-2.02528	-1.52977	0.0887575	0.446176	71950
Rgs4	-2.02062	2.80074	7.735e-07	8.93863e-05	19736
Trim43b	-2.01966	-1.57885	0.0576819	0.362862	666747
Krt82	-2.01747	-1.34904	0.0407105	0.302433	114566
6030452D12Rik	-2.01697	-0.896397	0.0134305	0.151164	330837
Mup12	-2.015	-1.41005	0.0635008	0.380842	100039054
Sp7	-2.01497	-1.38974	0.119924	0.513375	170574
Mcpt8	-2.01362	3.16742	3.07308e-11	2.0479e-08	17231
Gm21104	-2.01318	-1.19444	0.0249475	0.225679	100861647
Ptprn	-2.0125	5.9426	3.57404e-13	3.19498e-10	19275
BC048679	-2.0102	-1.1751	0.029598	0.249673	210321
Npr2	-2.009	3.09439	1.31726e-07	2.05739e-05	230103
Trem1	-2.00633	-1.17379	0.0415388	0.305215	58217
Bean1	-2.0048	-0.223514	0.00799818	0.107315	65115
Rex2	-2.00393	0.0211139	0.0142323	0.157027	100043034
Serpina3b	-2.00189	-1.26941	0.0791177	0.423259	271047
Thbs2	-2.00128	2.44516	0.0111076	0.133562	21826
Fn1	-1.99914	13.3936	3.5261e-07	4.60743e-05	14268
Arap3	-1.9977	3.62465	1.1681e-05	0.000788942	106952
4921528I07Rik	-1.99147	-1.23882	0.029595	0.249673	77049
Htra1	-1.98787	4.58468	1.31327e-08	2.88514e-06	56213
Spdye4a	-1.98712	-0.771777	0.0283257	0.24296	74673
Obox2	-1.98704	-1.46539	0.0345856	0.274912	246792
Mir5103	-1.98477	-0.194443	0.00184225	0.0376203	100628580
Pthlh	-1.98389	3.42683	8.3294e-09	2.05582e-06	19227
Cd40	-1.98264	1.6863	7.70286e-05	0.00354828	21939
Mlc1	-1.98237	-1.34068	0.100462	0.472809	170790
Rasgrp3	-1.9818	2.44251	2.40709e-07	3.36521e-05	240168
Has2	-1.98038	3.44265	2.03789e-05	0.00122716	15117
Ccl7	-1.97796	-0.535875	0.0157684	0.168219	20306
Cyp3a41b	-1.97616	-0.523	0.0249793	0.225865	100041375
Gm14015	-1.96124	-1.59699	0.127469	0.521777	329483
Scin	-1.96112	3.17657	4.86397e-09	1.31406e-06	20259
Gm21082	-1.9606	-1.45969	0.0331228	0.267768	100861620
Serpinb9c	-1.95751	-1.76261	0.133156	0.529669	20707
Rasa4	-1.95728	4.25797	8.09552e-10	3.23691e-07	54153
Tcf15	-1.95618	-1.86311	0.0308125	0.256028	21407
Coro6	-1.95496	1.69611	4.41965e-06	0.000369697	216961
Adam12	-1.95484	6.7472	1.86047e-10	9.53707e-08	11489
Fkbp6	-1.95186	-1.23517	0.0462126	0.3208	94244
Vmn2r55	-1.95185	-1.42859	0.0937774	0.456391	100042499
Itm2a	-1.94689	-0.0665968	0.0468646	0.322963	16431
Lyz2	-1.94468	2.27269	0.00487937	0.0768098	17105
Wnt2	-1.94461	0.00051144	0.00811598	0.10812	22413
Gm10287	-1.94415	-1.21444	0.0326761	0.265287	100038391
Gm21977	-1.94203	-0.910876	0.0511239	0.337075	100504444
Vmn2r36	-1.93843	-1.71031	0.0916368	0.453466	100042653
Zic5	-1.93306	-1.92458	0.124707	0.519553	65100
Stac2	-1.92623	0.421363	0.00273826	0.0503154	217154
Fam205a2	-1.92545	0.153618	0.0278397	0.241136	545611
Mroh9	-1.92535	-1.16896	0.0500399	0.333514	78258
Gm19663	-1.92487	-1.85782	0.0970125	0.464767	100503376
4921524L21Rik	-1.92343	-1.56115	0.0977376	0.466402	70901
Vmn1r247	-1.9218	-1.51203	0.150916	0.55791	100043019
Gm10710	-1.92163	-1.13276	0.0428536	0.309848	100038599
Gm10782	-1.91923	-1.39775	0.0667327	0.389119	100038494
Vmn1r126	-1.91896	-1.71351	0.149424	0.556065	100043013
Adamts14	-1.91816	1.73636	0.00109927	0.0259464	237360
4933406K04Rik	-1.91798	-1.64421	0.0992649	0.471043	71033
Gm21451	-1.91692	4.14569	0.000117929	0.00495311	100862072
Nlrp12	-1.91562	-0.760467	0.0761723	0.416531	378425
Olfr154	-1.91521	-1.95138	0.112179	0.497419	27216
Vash1	-1.91252	3.27725	3.00246e-12	2.40101e-09	238328
Gm10432	-1.91154	-0.467416	0.00830151	0.10991	100038713
Pdilt	-1.90957	-1.23198	0.0923003	0.454623	71830
Cdh18	-1.90893	-1.84924	0.210415	0.627478	320865
Dgkk	-1.90744	1.2735	0.000191205	0.00698823	331374
Slc45a2	-1.90578	-0.914867	0.065676	0.385857	22293
Cthrc1	-1.90466	-0.315809	0.012614	0.145317	68588
C230024C17Rik	-1.89952	-0.807123	0.0648861	0.384585	329271
C6	-1.899	-1.18396	0.073942	0.409714	12274
Olfr1411	-1.8978	-1.96482	0.088836	0.446458	258483
Wdr88	-1.89544	-0.842016	0.0154335	0.165531	384605
Moxd2	-1.89501	-1.34278	0.110049	0.493073	194357
Scube2	-1.89464	-0.849309	0.0301841	0.252486	56788
Gimap4	-1.88911	-0.828098	0.0207598	0.202278	107526
Csgalnact1	-1.88812	3.60716	3.691e-09	1.05415e-06	234356
Gm21698	-1.88538	-0.432548	0.0419837	0.306604	100862388
C530050E15Rik	-1.88477	-1.08409	0.127678	0.521813	320489
Gnb4	-1.88464	1.71834	1.83727e-05	0.00112671	14696
Csf3r	-1.88426	-0.21308	0.0338322	0.271745	12986
Fcrlb	-1.88306	0.192879	0.0226489	0.213081	435653
Treml1	-1.87992	-1.06842	0.0516485	0.339095	71326
Gm2666	-1.87972	0.517535	0.0187968	0.189157	100040213
Fbn2	-1.87597	2.00043	0.00598425	0.0884993	14119
Mcoln3	-1.87479	-1.16139	0.0486438	0.32921	171166
Sparc	-1.87442	4.09895	1.53375e-05	0.000973423	20692
Slc6a1	-1.87384	-0.858972	0.0166308	0.174806	232333
Cyp3a41a	-1.87233	-0.328827	0.0189334	0.190237	53973
Dusp15	-1.8695	-1.363	0.076833	0.418496	252864
Hdx	-1.86803	1.30266	6.86748e-06	0.000524025	245596
C86187	-1.86743	-1.45619	0.0159488	0.169016	97402
Wnt11	-1.86515	2.97182	5.96917e-10	2.48616e-07	22411
Vmn2r20	-1.86356	-1.84588	0.0564489	0.35849	667180
Cx3cr1	-1.86347	0.941707	0.0240679	0.221633	13051
Rph3a	-1.86343	-0.252102	0.0219572	0.208933	19894
Dse	-1.86009	2.7248	0.000291265	0.00956153	212898
Lef1	-1.85243	1.27657	0.000356562	0.0111555	16842
Ccl6	-1.85131	0.932909	0.0142549	0.157073	20305
4930571K23Rik	-1.85101	-1.43457	0.124468	0.519303	75861
Wnt1	-1.85019	-0.629098	0.0235217	0.218415	22408
4933440J02Rik	-1.84633	-1.39077	0.0467469	0.322393	71321
Cdh26	-1.84366	-0.316866	0.0820274	0.428868	381409
Dytn	-1.84053	-1.50851	0.0937815	0.456391	241073
Rbp3	-1.83978	-1.26226	0.0979176	0.467058	19661
4931408C20Rik	-1.83916	-0.440126	0.0363686	0.282893	210940
Dpt	-1.83877	-0.941657	0.126565	0.521492	56429
Cntn6	-1.83765	-1.00024	0.0896867	0.448807	53870
4931430N09Rik	-1.83466	-1.04655	0.0644083	0.38323	74363
A830019L24Rik	-1.83362	-1.28296	0.122373	0.516681	320072
Gm17769	-1.83316	-1.10711	0.00659896	0.0945709	100045653
H2-M5	-1.83287	-1.05086	0.01976	0.195179	240095
Arhgap15	-1.83277	-0.42931	0.0316612	0.259602	76117
Gm20745	-1.83246	-1.23427	0.0749297	0.412795	434412
4930431F12Rik	-1.83196	-1.43685	0.137912	0.53756	75783
Lrfn5	-1.83159	-1.45037	0.0816998	0.428661	238205
Gm6249	-1.82992	-1.48961	0.153801	0.559703	621677
Ifng	-1.82622	-1.46648	0.176911	0.589469	15978
Ptafr	-1.82432	-0.880992	0.0144987	0.158414	19204
Snai2	-1.8226	0.372139	0.024713	0.224065	20583
Krt9	-1.82252	-1.24057	0.0670051	0.389925	107656
Gm10471	-1.82228	-0.300606	0.0326323	0.265089	100039045
Tbx21	-1.82178	-1.25915	0.029575	0.249673	57765
Fam205a3	-1.81882	-0.278004	0.0475571	0.325715	100862261
Gpx8	-1.81857	0.37491	0.000247338	0.00848161	69590
Treml2	-1.81644	-0.534144	0.0362991	0.282766	328833
Kcne4	-1.81643	-0.849095	0.0363804	0.282893	57814
Crocc2	-1.81526	2.15172	2.27222e-05	0.00133214	381284
Cd163	-1.81523	-0.131586	0.0490516	0.330127	93671
Gm17575	-1.81391	-0.812137	0.0920824	0.454623	100504171
Tlx2	-1.8121	-1.81089	0.0632541	0.380826	21909
Adam3	-1.80839	-0.634707	0.0276035	0.240289	11497
Hhipl1	-1.80748	-1.15139	0.0572014	0.361432	214305
2310002F09Rik	-1.807	-1.26616	0.0109971	0.132762	100504720
Spic	-1.80558	-1.78891	0.127227	0.521644	20728
Usp17le-ps	-1.80498	-1.34258	0.126592	0.521496	667882
Speer4a	-1.80451	-1.30401	0.138747	0.538213	75657
Ssu2	-1.80451	-1.36923	0.0293716	0.248917	243612
Dmrta2	-1.80298	0.641079	7.03512e-05	0.00329382	242620
Psg29	-1.80181	-1.28764	0.124376	0.519232	114872
Pnpla5	-1.79884	-1.41093	0.127209	0.521644	75772
Gm19765	-1.7986	1.19593	4.58162e-05	0.00234396	100503552
Tmem132e	-1.79816	-0.975614	0.0398682	0.298109	270893
Ccl3	-1.7962	-1.51567	0.164536	0.573265	20302
Axl	-1.7956	5.96262	5.11457e-06	0.000410644	26362
D730045A05Rik	-1.79239	-0.625449	0.00842767	0.110919	77855
Krt35	-1.79155	-1.24128	0.0215964	0.206408	53617
Alox12b	-1.79082	-1.21038	0.0939711	0.456653	11686
Smyd1	-1.78979	-0.757267	0.094939	0.458685	12180
Nlrp4d	-1.7896	-1.53014	0.143736	0.545008	384752
Cyp2a12	-1.78693	-1.13087	0.0658299	0.386357	13085
Gm20597	-1.78518	-0.665204	0.0275265	0.240079	100502868
Plod2	-1.784	2.30141	3.25601e-05	0.00181828	26432
Col5a1	-1.78232	4.52628	1.57041e-05	0.000989451	12831
Olfr93	-1.78063	-1.58823	0.137878	0.53756	258051
Gja3	-1.78044	-2.03404	0.112221	0.497419	14611
Aadacl3	-1.77739	-1.58305	0.246998	0.663921	230883
Gm15958	-1.77624	-0.096829	0.00471907	0.0751144	100503546
Musk	-1.77582	-1.14166	0.056269	0.357972	18198
Ttc39c	-1.77548	3.16437	3.56109e-12	2.7382e-09	72747
Gm5134	-1.77513	-0.74968	0.0292511	0.248846	333669
Psg26	-1.77494	-1.73433	0.109796	0.492772	574429
9330111N05Rik	-1.77412	-1.06692	0.133503	0.529786	319983
Rgs16	-1.77331	3.39682	3.34584e-05	0.00184886	19734
Grm7	-1.7728	-0.810619	0.092476	0.454623	108073
Nrsn1	-1.77039	-1.6659	0.0633567	0.380826	22360
Il22ra2	-1.7691	-1.3602	0.0358208	0.280796	237310
Tmem59l	-1.76899	0.257331	0.000734085	0.0193103	67937
Gm4541	-1.76796	-1.87132	0.143832	0.545008	100043595
Gypc	-1.76674	-1.44716	0.0821988	0.429513	71683
Jag1	-1.76662	8.08599	6.20678e-12	4.28278e-09	16449
Vmn1r258	-1.76476	-1.54611	0.200712	0.617235	100043079
Bnc2	-1.76405	3.26249	2.96319e-06	0.000269731	242509
F630040K05Rik	-1.76319	-0.0379504	0.00157866	0.0337186	433111
Mroh5	-1.76254	-1.48755	0.119141	0.511546	268816
Chst3	-1.76199	0.368572	0.00456234	0.0729871	53374
Trim66	-1.75888	0.778381	0.00727858	0.101168	330627
6530402F18Rik	-1.7559	0.079743	0.00108635	0.0257632	76220
A230006K03Rik	-1.75192	-0.661103	0.0464526	0.321788	27493
Gpr119	-1.75131	-1.49388	0.0626563	0.379652	236781
Sectm1a	-1.75044	-1.48754	0.14587	0.549001	209588
Ccdc63	-1.74798	-0.94361	0.0677491	0.392869	330188
Tmeff1	-1.74616	4.52299	6.05456e-09	1.57198e-06	230157
Gm10845	-1.74488	-0.847982	0.0355649	0.279596	100038734
Gm16427	-1.74471	-0.324764	0.143016	0.543984	100040885
Krt73	-1.74196	-1.49384	0.125268	0.519753	223915
Cd209c	-1.73931	-1.06569	0.0404234	0.300985	170776
A930009A15Rik	-1.7389	-0.450524	0.0882661	0.444824	77798
Klhl14	-1.73874	-1.448	0.123775	0.518195	225266
Gm10552	-1.73816	-0.776954	0.0636751	0.381089	100503502
Eln	-1.73784	1.4817	0.00306852	0.0545782	13717
Hapln1	-1.73724	-1.02975	0.0398207	0.298109	12950
Btbd35f20	-1.73608	-0.996653	0.0233582	0.21744	668963
Fkbp1b	-1.73442	0.0742303	0.00128514	0.0291414	14226
Platr30	-1.73411	-0.45913	0.0547401	0.351321	100504145
Ptx3	-1.73278	-0.749421	0.00992843	0.124365	19288
Clec4e	-1.73243	-1.1182	0.0393988	0.296456	56619
Gm5152	-1.73193	-1.039	0.0557692	0.355976	381612
Bpifc	-1.73089	-0.874652	0.0716978	0.404131	270757
Bcl2a1a	-1.73019	-1.69851	0.09758	0.466034	12044
Olfr287	-1.72842	-1.25452	0.100703	0.47315	634104
Ssxb1	-1.72682	-1.91353	0.135721	0.534436	67985
Adgrf4	-1.72574	-0.650423	0.0424011	0.307354	78249
Prrx1	-1.72405	0.467644	0.0281829	0.24192	18933
Vmn1r244	-1.72344	-1.4127	0.211791	0.629353	435949
Rnf165	-1.72229	-0.419615	0.0528791	0.343594	225743
Gm15433	-1.72204	0.480437	0.0713435	0.403365	100503433
Gpr176	-1.72174	-0.0136643	0.0147084	0.159641	381413
Crnn	-1.71968	-1.58591	0.174878	0.586604	381457
Scnn1g	-1.71757	-1.02756	0.0523608	0.341965	20278
Nptx1	-1.71683	4.91785	6.65246e-06	0.000509563	18164
Usp17la	-1.71611	-1.30163	0.192946	0.60973	13531
Gm14149	-1.71577	-1.25816	0.0655377	0.385561	100038513
Rsph6a	-1.71539	-0.0891655	0.000710048	0.0187768	83434
Abca17	-1.71517	0.392573	0.0247308	0.22407	381072
Crabp1	-1.71509	-1.29044	0.221361	0.640455	12903
Vmn1r242	-1.71414	-2.06797	0.207522	0.62517	100043523
2900052N01Rik	-1.71387	-1.1679	0.106683	0.486763	73040
Gm10765	-1.71327	-0.963719	0.0380742	0.291101	100038529
Kcna5	-1.71247	-1.49565	0.158879	0.567097	16493
Gm7942	-1.71204	-0.496834	0.0614995	0.376685	666133
Prdm8	-1.71188	2.1408	2.97803e-07	4.02276e-05	77630
B230214G05Rik	-1.71183	-1.52658	0.0677773	0.392869	328579
Parvb	-1.70613	3.79514	2.83322e-09	8.454e-07	170736
4833422C13Rik	-1.70595	1.70926	2.01521e-05	0.00121716	373852
G6pc	-1.70577	-0.966356	0.057859	0.363415	14377
Adgra1	-1.70445	0.39039	0.0301051	0.252141	52389
Gm7340	-1.70386	-0.751164	0.0180117	0.184189	664791
Gm12295	-1.7024	-1.13249	0.0799202	0.42539	327946
Speer1	-1.70213	-0.719414	0.0543118	0.349132	70896
Gm614	-1.70165	-1.85695	0.0658214	0.386357	245536
Ccdc110	-1.70147	-1.59204	0.100848	0.473369	212392
Ephb1	-1.70093	-0.470568	0.0161293	0.170432	270190
Fibin	-1.70074	-1.59359	0.132253	0.528788	67606
Ooep	-1.69991	-1.7213	0.0724227	0.406463	67968
Pifo	-1.69801	-1.59878	0.0758895	0.416008	100503311
Mab21l4	-1.69763	5.43599	7.60092e-09	1.89947e-06	71874
Gm6866	-1.69413	-1.17444	0.0744543	0.411072	628304
Skap1	-1.69229	0.308244	0.0123604	0.143086	78473
Vim	-1.69197	8.18445	0.000161257	0.00613368	22352
Olr1	-1.6901	4.11947	1.92591e-08	4.05292e-06	108078
Wnt10b	-1.68992	2.21813	1.23082e-06	0.000128159	22410
Wdr63	-1.68892	-0.836597	0.0464951	0.321971	242253
Arpp21	-1.6875	0.27595	0.0539379	0.347735	74100
Gmnc	-1.68661	-1.26586	0.165421	0.574847	239789
Col8a1	-1.68608	3.61183	0.00202995	0.0403407	12837
Il1b	-1.68574	0.88783	0.0093772	0.119324	16176
Uchl1	-1.68505	3.43172	0.000273015	0.0091273	22223
Atp8b4	-1.68496	-0.0145863	0.0339472	0.272134	241633
Pax1	-1.6843	-0.829467	0.164869	0.573826	18503
Gm1141	-1.68083	-1.31421	0.109173	0.49168	382221
Ntsr1	-1.67919	-1.17632	0.1797	0.593873	18216
Btbd35f19	-1.67731	-1.15917	0.0317823	0.260316	100040448
4930572O03Rik	-1.67513	-0.592426	0.05207	0.340636	381715
Nwd2	-1.67479	-0.4009	0.0628315	0.379801	319807
3110015C05Rik	-1.67466	-1.59336	0.148642	0.554828	73129
Irx2	-1.67382	0.43043	0.0293479	0.248917	16372
Fbxw19	-1.67292	-1.10199	0.0827202	0.430662	235612
2810471M01Rik	-1.67273	-2.02617	0.09104	0.452529	72818
Phactr3	-1.67271	-0.777019	0.0495904	0.33196	74189
Klrk1	-1.67101	-1.14954	0.166077	0.574847	27007
Il10ra	-1.671	-0.621228	0.0457288	0.319367	16154
Abcb11	-1.66915	-0.557793	0.0647922	0.384256	27413
Gfral	-1.66886	-1.94079	0.201357	0.618227	404194
Bnc1	-1.6682	-0.957048	0.0851623	0.437677	12173
Asb15	-1.66725	-0.50104	0.0295952	0.249673	78910
8030474K03Rik	-1.66602	-1.68793	0.0973614	0.465546	382231
Lcp2	-1.66516	-0.304917	0.0239332	0.221004	16822
Gm19945	-1.66431	-1.8142	0.067772	0.392869	100503893
Vmn1r254	-1.66343	-1.3978	0.231286	0.650698	667485
Pnlip	-1.66229	2.56685	0.0754121	0.414301	69060
Ppp1r3a	-1.66195	-1.45233	0.0426552	0.308748	140491
Krt71	-1.66141	-1.49984	0.134767	0.533052	56735
4930419G24Rik	-1.66137	-1.61893	0.0747157	0.41206	73874
Chst10	-1.66107	-1.08292	0.0727696	0.407034	98388
Gm5073	-1.66034	-1.10621	0.0854918	0.438479	278181
4933404G15Rik	-1.6598	-1.64615	0.160541	0.568998	74066
Lgals1	-1.65951	5.82193	6.9774e-07	8.20542e-05	16852
Mir467a-6	-1.65921	-1.50197	0.136855	0.535886	100124627
Crhbp	-1.65909	-1.53353	0.165886	0.574847	12919
Gm3302	-1.65825	-1.03873	0.0776744	0.420262	100041380
Gm15348	-1.65659	-0.959774	0.154616	0.560583	100038554
Snx31	-1.6565	-0.665447	0.0124575	0.143794	66696
Chil4	-1.65643	3.24058	0.0902139	0.450228	104183
Cd207	-1.65543	-1.20131	0.0691095	0.396355	246278
Gm9602	-1.65399	-1.56901	0.0927302	0.454623	673676
Hs3st4	-1.65176	-1.20498	0.0807794	0.42712	628779
Gjc1	-1.65146	0.223548	0.0168306	0.176443	14615
Rhox3d-ps	-1.65087	-1.10156	0.0620204	0.377791	546295
Col6a3	-1.65076	3.00832	0.00916456	0.117372	12835
Igsf10	-1.65052	0.366036	0.0529642	0.343674	242050
Kel	-1.65051	-0.204564	0.0538753	0.347556	23925
Gm16617	-1.6501	2.70711	1.47777e-05	0.000940876	100502764
Aif1l	-1.64958	3.0528	2.22122e-07	3.14941e-05	108897
Htr5a	-1.64954	-1.12207	0.0831048	0.431989	15563
Ptprq	-1.64861	0.0366591	0.0373999	0.287798	237523
Spata18	-1.64768	-0.271142	0.0441462	0.313439	73472
Slc7a2	-1.6472	3.11747	0.000141317	0.00561671	11988
Entpd1	-1.64615	2.33756	0.00024444	0.00841108	12495
Mir148a	-1.64438	-2.10361	0.138055	0.5378	387166
Piwil1	-1.64426	-0.744877	0.0881721	0.444574	57749
Wfdc8	-1.64126	1.3428	6.38468e-06	0.000495415	277343
Zfp987	-1.64026	-0.351422	0.00742861	0.102493	626316
Gm6176	-1.63931	-1.16344	0.120748	0.514708	620736
Slc4a1	-1.63847	-0.429087	0.0240255	0.221549	20533
Acap1	-1.6379	1.72878	0.000390006	0.011922	216859
Mro	-1.63757	-0.263575	0.080535	0.426554	71263
Slc6a18	-1.63646	-1.22701	0.0634708	0.380842	22598
Gm8068	-1.63437	-1.10208	0.148928	0.555486	666376
Csf2rb	-1.63429	0.431854	0.0159051	0.168866	12983
Gm16429	-1.63419	0.136466	0.0444365	0.314357	100040981
Chst11	-1.63408	3.05051	5.24556e-09	1.37986e-06	58250
Mrc2	-1.63242	1.50737	0.0127887	0.14676	17534
Lamb1	-1.63193	7.65268	9.80275e-09	2.33495e-06	16777
Camta1	-1.63178	4.32872	1.02317e-13	1.1364e-10	100072
Gm13102	-1.63062	-0.823801	0.201156	0.618227	100041077
Gucy2d	-1.63001	-0.868992	0.0454221	0.318401	14918
Vcan	-1.62765	6.40343	9.15559e-07	0.000101287	13003
AU023762	-1.62723	-1.32629	0.0493183	0.33128	102688
Gm3139	-1.62708	0.426092	0.124262	0.519175	100041102
Adamts12	-1.62702	2.08343	0.0018129	0.037211	239337
Acsbg2	-1.62545	-0.988932	0.0447893	0.315746	328845
Btbd35f25	-1.62514	-1.23599	0.144183	0.545619	100862274
Gm19514	-1.62409	2.40984	0.000228868	0.00794362	100503026
Gm5606	-1.62366	-1.3682	0.0773731	0.419648	434279
Krt16	-1.62363	4.86129	0.00724927	0.100983	16666
Klhl6	-1.62336	-1.22687	0.0817923	0.428846	239743
Gm10376	-1.62121	-1.22897	0.136083	0.535545	100042130
Gabrg2	-1.61948	-1.51638	0.120883	0.514708	14406
Psg18	-1.61754	-1.56944	0.15363	0.559703	26438
4933424G06Rik	-1.61574	-1.77355	0.130207	0.526303	71166
Triml1	-1.61573	-1.51851	0.12355	0.517975	244448
C130026I21Rik	-1.61546	1.57714	0.043788	0.311866	620078
Gm7664	-1.61332	-1.05137	0.0230615	0.215542	665503
Ccdc69	-1.61318	-1.11113	0.0651712	0.38531	52570
Nat8f3	-1.61302	-1.51832	0.194107	0.610538	93674
Oxgr1	-1.61273	-1.22662	0.14794	0.553551	239283
Gad1	-1.61169	-0.138911	0.0169099	0.176811	14415
Gm10486	-1.6104	-0.386609	0.153721	0.559703	100039550
Ngf	-1.61024	4.40223	0.000184589	0.00678363	18049
Gm7932	-1.60736	-1.71832	0.0672155	0.390631	666105
Adam18	-1.6071	-0.961029	0.0738643	0.409511	13524
Gm5862	-1.6068	-0.737178	0.121377	0.515549	545739
Frmd3	-1.60677	-0.778861	0.108367	0.489598	242506
Iqcm	-1.60654	-1.52958	0.129794	0.525592	71831
1700091H14Rik	-1.60538	-1.46783	0.193557	0.609937	73553
Oca2	-1.60518	-1.02763	0.16839	0.578321	18431
BC018473	-1.60511	-1.16196	0.0865327	0.440806	193217
Ccl9	-1.60413	0.335028	0.0109311	0.132285	20308
Rbpms2	-1.60295	2.16575	4.62359e-05	0.00235803	71973
Gm11149	-1.60269	-1.70144	0.102751	0.477389	100036537
Cndp1	-1.6026	-1.06998	0.0873957	0.442462	338403
Adamts3	-1.60243	1.04729	0.00507153	0.0785361	330119
Gucy1b2	-1.60138	-0.224775	0.0240521	0.22159	239134
Gm16497	-1.60079	-1.27855	0.152304	0.558691	791361
Gm10375	-1.59987	-1.37484	0.162098	0.570954	100042342
Fam135b	-1.59676	-0.550443	0.0682371	0.394276	70363
Mesp1	-1.59595	-1.97337	0.180664	0.595127	17292
A130077B15Rik	-1.59559	-1.48074	0.127028	0.521644	319272
H2-Ea-ps	-1.5952	-1.37581	0.245071	0.662575	100504404
Rdh19	-1.59511	-1.53306	0.0804081	0.426527	216453
Gm5065	-1.59507	-0.669453	0.0654903	0.385536	272350
Tepp	-1.59499	-1.27475	0.0362166	0.282329	73407
Dcc	-1.59379	0.982565	0.00159805	0.0340962	13176
Iqca1l	-1.5937	-0.149996	0.01952	0.193573	231045
Gm6502	-1.59193	-0.1517	0.0809827	0.427526	624421
Msi1	-1.59177	1.01828	0.00284691	0.0516564	17690
Sox2ot	-1.59148	-1.59654	0.106869	0.486768	320478
Meox2	-1.59096	-1.29949	0.0416878	0.305395	17286
Zeb1	-1.59012	4.36123	1.39565e-09	5.0244e-07	21417
Gm7104	-1.58953	-1.53772	0.110909	0.49517	633093
Sfrp4	-1.58941	-1.47935	0.116279	0.504589	20379
Apol11b	-1.58753	-1.26522	0.0384851	0.293214	328563
Mir350	-1.58709	-1.80535	0.073451	0.408238	723921
Bcl2a1b	-1.58622	-0.878591	0.0451007	0.317037	12045
Lefty2	-1.58539	-0.89235	0.126975	0.521644	320202
A730089K16Rik	-1.5845	-1.25215	0.0653188	0.385536	320411
Bank1	-1.58425	-0.671334	0.102286	0.47589	242248
Cd37	-1.58368	-1.11072	0.0116713	0.138066	12493
Shc3	-1.5828	-1.0389	0.107726	0.488948	20418
Ucn2	-1.58265	-0.0468698	0.0238235	0.220397	171530
Saa4	-1.58211	-1.71046	0.159068	0.567172	20211
Pxdn	-1.58168	7.47777	1.50484e-08	3.2005e-06	69675
Igfbp1	-1.58072	-1.40855	0.0281554	0.24192	16006
Gm8883	-1.57985	0.0463413	0.0100863	0.125636	667931
I0C0044D17Rik	-1.57867	-1.2821	0.152789	0.559323	545660
Npr3	-1.5783	0.621947	0.0080099	0.1074	18162
Msr1	-1.5779	-1.24494	0.154574	0.560583	20288
Gm7971	-1.57726	0.0421355	0.0616374	0.377067	666187
Cavin4	-1.57692	0.713059	0.00269498	0.0497029	68016
Vmn1r252	-1.57564	-1.77654	0.179168	0.592908	667094
Ferd3l	-1.57562	-2.15765	0.224543	0.643413	114712
Tcp10c	-1.57524	0.596991	0.0500973	0.333514	100041352
Mmp3	-1.57454	-0.406179	0.0351362	0.277975	17392
Ccdc81	-1.57442	-0.570676	0.137538	0.536893	70884
Lhx6	-1.57395	-0.545544	0.0298626	0.25076	16874
Otx1	-1.57294	-0.645523	0.0808859	0.427433	18423
Ahrr	-1.57247	-1.01439	0.036074	0.281715	11624
4930546C10Rik	-1.57232	-1.36199	0.0931162	0.455348	78931
C2cd4a	-1.57219	-0.93339	0.0960675	0.461789	244911
Uroc1	-1.57183	-0.39206	0.0810929	0.427526	243537
Bend6	-1.56993	-1.19436	0.1218	0.515573	320705
Clec4n	-1.56877	-0.96202	0.0714824	0.40358	56620
Gm3089	-1.56751	-0.983296	0.106397	0.486257	100041003
Rbm46os	-1.56258	-1.058	0.0750322	0.413121	78212
Ccdc83	-1.5621	-0.628743	0.120286	0.513921	75338
F830005K03Rik	-1.56094	-1.55365	0.154325	0.560219	442816
Meiob	-1.5608	-0.917252	0.138679	0.538213	75178
Hfm1	-1.56005	-0.836179	0.127684	0.521813	330149
Gabrb2	-1.55986	-1.17331	0.198096	0.615438	14401
Vmn1r171	-1.55846	-1.74528	0.0870553	0.441757	81012
Gab3	-1.55738	-1.27993	0.0450271	0.316631	210710
Fcrl6	-1.55418	-1.48064	0.0966191	0.46366	677296
Slc6a3	-1.55197	-0.625102	0.119783	0.513115	13162
Defa28	-1.55191	-1.76949	0.319029	0.728419	626682
Ppp1r1a	-1.55125	-1.26759	0.159219	0.567172	58200
Vmn2r48	-1.5512	-1.37685	0.0804152	0.426527	625580
Cd300ld4	-1.55053	-0.214271	0.104673	0.482617	100043123
Ces1h	-1.5503	-1.06553	0.225347	0.643442	75704
Gm10488	-1.55022	-0.422685	0.192206	0.609698	100042109
Sbk2	-1.5498	-1.61495	0.127166	0.521644	381836
Nlrp5	-1.54854	-0.680352	0.0894062	0.447752	23968
4933401D09Rik	-1.54837	-1.50008	0.277906	0.691699	71008
Zfyve28	-1.54797	-0.675674	0.109741	0.492689	231125
Ofcc1	-1.54666	-1.01817	0.19956	0.615713	218165
Hotair	-1.54632	-1.17614	0.261286	0.676934	100503872
Erc2	-1.54625	4.39131	2.25871e-13	2.25781e-10	238988
Gm10302	-1.54604	-1.05779	0.163504	0.572363	100042688
Gm21680	-1.54547	-0.999736	0.123582	0.517975	100862368
Nlrp1a	-1.54541	-0.644182	0.0833529	0.432757	195046
Ibsp	-1.54538	-1.21237	0.137136	0.536205	15891
Slc44a5	-1.5437	-1.06773	0.139526	0.539012	242259
Havcr2	-1.54299	0.74272	0.00498517	0.0776801	171285
Gm16519	-1.54182	-1.77082	0.131653	0.528304	546695
Aebp1	-1.54112	3.90659	0.000123674	0.00516179	11568
Pramel4	-1.53935	-0.779519	0.245024	0.662575	347710
Gm10681	-1.53922	-0.626718	0.0396156	0.297295	100043456
Tbx3	-1.53921	0.610202	0.00883947	0.114827	21386
Cd3g	-1.5387	-1.59107	0.226784	0.645068	12502
Tacr3	-1.53806	-1.37286	0.0626004	0.379495	21338
Ccl4	-1.53804	-1.51634	0.0948392	0.458685	20303
Gm10591	-1.53751	-0.843978	0.125945	0.520412	100504239
A330102I10Rik	-1.53745	-1.18299	0.204924	0.622904	77920
Lif	-1.53663	6.63344	0.000309131	0.0100165	16878
Txndc2	-1.53593	-1.08391	0.0203769	0.199303	213272
Pcdha9	-1.53483	-0.761034	0.0601455	0.371064	192161
Ccr2	-1.53429	-1.24301	0.0767698	0.418425	12772
Sirpb1a	-1.53407	-1.60989	0.275808	0.689444	320832
Tcam1	-1.53392	-0.531572	0.0338318	0.271745	75870
Amph	-1.53377	-0.149724	0.055786	0.355976	218038
Cyth4	-1.5331	1.30165	0.00278069	0.050815	72318
Ltbp2	-1.53264	5.8639	0.000246476	0.00846657	16997
Adamts16	-1.53025	1.89279	0.00455727	0.0729871	271127
Dennd2a	-1.52877	3.13481	1.14298e-05	0.000777228	209773
Apba2	-1.52753	-0.873927	0.145432	0.548257	11784
Postn	-1.52717	2.16406	0.0126494	0.145505	50706
Vwc2l	-1.52607	-1.2909	0.134842	0.533052	320460
Trpc3	-1.52561	-0.887944	0.137577	0.536893	22065
Fmo3	-1.52471	-1.74638	0.149501	0.556065	14262
Rhbg	-1.52439	-1.0524	0.0292253	0.248732	58176
Cntfr	-1.52384	1.38748	0.000374717	0.0115537	12804
Triml2	-1.52258	-1.84542	0.34685	0.746266	622117
LOC100504180	-1.52144	0.902891	0.0868503	0.441473	100504180
Itga5	-1.52127	7.47341	1.57175e-07	2.38048e-05	16402
Krt74	-1.51885	-1.26606	0.0616232	0.377067	406222
Gm10876	-1.51859	-1.01483	0.0581038	0.36437	100038376
Pdcd1lg2	-1.51782	-0.39146	0.111882	0.497231	58205
Cyp11a1	-1.51743	1.27677	0.00141165	0.0312533	13070
Ednra	-1.51591	0.0373388	0.0234567	0.218114	13617
Atp12a	-1.51521	-0.646629	0.0524632	0.342009	192113
Gm10860	-1.51505	-2.17938	0.285909	0.70063	100038671
Gm13497	-1.51498	-2.07809	0.198929	0.61567	329404
4930519G04Rik	-1.51497	-0.841033	0.0810699	0.427526	67593
Gdpd4	-1.51382	-0.173691	0.0230973	0.215734	233537
Slco1a1	-1.51377	-1.46469	0.210861	0.628408	28248
Gm21190	-1.5132	-0.156335	0.125589	0.519938	100861755
Glb1l3	-1.51278	-1.04202	0.164343	0.573265	70893
Hmga2-ps1	-1.5124	3.79005	6.08298e-08	1.04837e-05	15365
Emx2os	-1.51127	-0.984579	0.0642047	0.382588	329078
Speer4cos	-1.5106	-1.32882	0.286968	0.701439	75858
Piezo2	-1.51058	7.20165	1.2616e-05	0.000835503	667742
Dppa2	-1.51044	-0.849815	0.120587	0.514573	73703
Gm10839	-1.51027	-1.84349	0.111576	0.496689	100038621
Gzmb	-1.51023	-1.51266	0.282207	0.697219	14939
Slco1c1	-1.50998	-1.28832	0.174625	0.586259	58807
Pcolce2	-1.50968	2.80234	1.07959e-05	0.000746821	76477
Aurkc	-1.50941	-1.34314	0.0815496	0.428437	20871
Crhr1	-1.50936	-0.965017	0.151353	0.55791	12921
Osm	-1.50928	-0.338279	0.0892507	0.447266	18413
Dmp1	-1.50871	-1.12374	0.160886	0.569348	13406
Ust	-1.50864	2.71024	2.13065e-05	0.00126398	338362
Dll4	-1.50795	4.2869	0.0128245	0.147012	54485
2410021H03Rik	-1.50779	-1.65152	0.139936	0.53987	69750
Cdcp3	-1.50627	-0.010321	0.0276746	0.240657	71395
Dchs1	-1.50592	1.3912	0.00133152	0.0298428	233651
Dhrs2	-1.50407	-1.09031	0.137887	0.53756	71412
Gm10424	-1.50406	-0.58906	0.0848919	0.437074	100041264
Gm7982	-1.50386	-0.641933	0.0774548	0.419869	666209
Gm19434	-1.5024	-1.25184	0.102519	0.476752	100502888
Akap4	-1.50197	-1.89395	0.228074	0.645909	11643
Npsr1	-1.50186	-1.25776	0.120847	0.514708	319239
Gfpt2	-1.50142	4.03434	6.21252e-12	4.28278e-09	14584
Ctrc	-1.50098	-0.906948	0.0659311	0.386589	76701
Ccnb3	-1.49985	-1.82331	0.215713	0.633469	209091
Cd84	-1.49936	-0.791729	0.0793868	0.423977	12523
H2-Bl	-1.49876	-1.35945	0.121435	0.515549	14963
B3gnt7	-1.49771	2.92909	1.06138e-06	0.000114439	227327
Mkx	-1.49713	-0.0351812	0.0028709	0.0519882	210719
Nfam1	-1.49559	-1.26079	0.197925	0.615346	74039
Plekho1	-1.49492	2.22661	0.000175425	0.0065431	67220
Skint5	-1.49475	-1.17874	0.113766	0.499432	242627
Slc36a2	-1.49444	-1.22335	0.206753	0.624532	246049
Lrtm1	-1.49441	-0.585466	0.154291	0.560219	319476
Actl6b	-1.49378	-1.00523	0.125344	0.519753	83766
Timd2	-1.49354	-1.61967	0.13164	0.528304	171284
Krt72	-1.49239	-1.16559	0.137084	0.536205	105866
B430319G15Rik	-1.49236	-0.837286	0.118217	0.509241	78575
Pth2r	-1.49203	-0.67008	0.0840666	0.434645	213527
LOC100861618	-1.49174	-0.885229	0.0688987	0.395925	100861618
Pdzrn4	-1.4911	-0.67062	0.099127	0.470733	239618
Nlrp4f	-1.48955	-1.49374	0.199584	0.615713	97895
Gm20262	-1.4885	-1.43269	0.168788	0.578957	100504516
AU018091	-1.48849	-1.18349	0.112297	0.497419	245128
Gm6367	-1.48848	-0.352185	0.116013	0.503764	622894
Gm10790	-1.48812	-1.52299	0.134997	0.533163	100038577
Usp44	-1.48768	-0.389045	0.0170554	0.177861	327799
1700011L22Rik	-1.48717	-1.76851	0.171416	0.581924	67687
8030453O22Rik	-1.48708	-1.27177	0.0829399	0.431357	77209
Gm10647	-1.48652	-1.11733	0.0820342	0.428868	100038381
D730002M21Rik	-1.48618	-1.80596	0.263765	0.67866	269094
Mfap5	-1.48562	-0.531988	0.170599	0.581248	50530
Zar1l	-1.48544	-1.51686	0.0815286	0.428437	545824
Gm53	-1.48489	-1.94836	0.255257	0.670043	193022
E330014E10Rik	-1.48411	-0.338855	0.10784	0.489209	665943
Jam2	-1.48384	4.93672	5.74496e-05	0.0027877	67374
Mir673	-1.48339	-1.69759	0.159691	0.5677	751547
Zic2	-1.48285	-1.31464	0.109809	0.492772	22772
Gm16325	-1.4826	-0.930895	0.0404803	0.301297	100286843
Tmem202	-1.48207	-1.66993	0.111195	0.495653	73893
Antxr2	-1.48199	6.99942	1.61261e-10	8.48404e-08	71914
Gm3460	-1.48178	-2.18261	0.280973	0.695629	100041664
Ebf4	-1.48101	1.53254	0.00024094	0.00830496	228598
Dsc1	-1.47981	-0.772781	0.242731	0.661228	13505
Adgb	-1.47897	0.49026	0.0117239	0.138285	215772
Ttll9	-1.47877	-0.384304	0.0452941	0.317938	74711
Cckbr	-1.47856	-1.07551	0.0894071	0.447752	12426
Cd109	-1.4753	1.93792	0.000353169	0.0111063	235505
Gm3183	-1.47486	0.642939	0.139095	0.538288	100041179
Cd83	-1.47485	0.0133661	0.0313864	0.257792	12522
4930407I10Rik	-1.47412	-0.0343912	0.108178	0.489429	328573
Gsdma	-1.47363	-0.901137	0.0664876	0.388288	57911
Tnni1	-1.47309	-0.398153	0.0083721	0.110406	21952
Speg	-1.47238	1.62056	0.00328595	0.0573736	11790
Nos2	-1.47154	2.03414	0.00706215	0.0992175	18126
Vmn2r13	-1.47093	-1.71853	0.217107	0.634794	231589
Gucy2e	-1.47014	0.19666	0.0593702	0.369185	14919
Ccr7	-1.46998	-1.14349	0.138858	0.538213	12775
Sycp2l	-1.46948	1.65687	0.00172026	0.0359368	637277
Grm2	-1.46867	-0.854007	0.119509	0.512338	108068
Csn1s1	-1.46788	-1.56212	0.147128	0.551853	12990
Spink2	-1.46664	-1.43535	0.0311237	0.256919	69982
Vwa5b1	-1.46566	-0.146559	0.0743319	0.410867	75718
4930449E18Rik	-1.46544	-1.16904	0.0875278	0.442462	78120
Slc6a11	-1.46421	-1.23026	0.173531	0.585129	243616
Slc13a4	-1.46276	-0.155063	0.0407238	0.302433	243755
Klrb1c	-1.46228	-0.699386	0.118457	0.509947	17059
Agxt2	-1.46202	-0.931226	0.216273	0.634375	268782
Gm5084	-1.46185	-1.06487	0.208268	0.625312	100503759
Add2	-1.46176	5.08136	1.60085e-09	5.2466e-07	11519
Slc6a7	-1.46105	-0.655767	0.259354	0.674428	240332
Asxl3	-1.46008	1.32892	0.00360903	0.0616155	211961
Serpinh1	-1.45966	6.77436	8.84027e-09	2.1553e-06	12406
Edn3	-1.45913	-1.16068	0.0824952	0.430073	13616
Clgn	-1.45895	-1.10675	0.167565	0.576967	12745
Pcdhb21	-1.4588	-0.884877	0.0701206	0.398367	93892
Vmn2r53	-1.45877	-1.71562	0.22718	0.645273	637908
Slc4a11	-1.45865	5.87822	3.40145e-13	3.19498e-10	269356
Sun5	-1.45766	-1.66787	0.125167	0.519753	76407
Gxylt2	-1.45735	0.0364031	0.0515394	0.338559	232313
Frmpd2	-1.45667	-0.605606	0.127961	0.522189	268729
Cplx4	-1.45645	-1.57401	0.252786	0.667992	225644
Tbc1d21	-1.45618	-1.46873	0.20346	0.621192	74286
Dlk1	-1.45496	0.976927	0.03074	0.255744	13386
Adamts19	-1.45471	-0.651576	0.212241	0.629353	240322
Adgre1	-1.45353	-0.370167	0.0635896	0.380966	13733
Sema5b	-1.45285	-0.349998	0.0632707	0.380826	20357
Esr2	-1.45275	-0.519934	0.0398731	0.298109	13983
Xirp2	-1.45266	4.77123	1.49885e-06	0.000149825	241431
Iqca	-1.45248	-0.357536	0.10455	0.482223	74918
Rad21l	-1.45247	-1.56367	0.295664	0.708799	668929
1700001L19Rik	-1.45151	-1.56242	0.136477	0.535847	69315
4932431P20Rik	-1.45114	0.9057	0.075885	0.416008	114675
Arhgef25	-1.4506	1.44125	0.00202068	0.0402365	52666
Gpr83	-1.45032	-1.56594	0.212825	0.629745	14608
Efcab6	-1.44991	-0.126971	0.12447	0.519303	77627
Bcat1	-1.44969	0.522459	0.0915182	0.453138	12035
Rassf2	-1.44756	-0.118001	0.0508444	0.335853	215653
Nkx3-1	-1.44619	-1.47591	0.192603	0.60973	18095
Dsg4	-1.44599	-0.228701	0.132676	0.529072	16769
Gm3106	-1.44595	0.750932	0.183558	0.598689	100041032
Tcp10a	-1.44588	-0.715215	0.0407728	0.302572	21461
Clcnka	-1.44533	-0.687319	0.0244609	0.223094	12733
Lrp2	-1.44532	1.42058	0.00572874	0.086112	14725
5830418P13Rik	-1.44525	-1.49603	0.271252	0.684987	100529079
Prr30	-1.44476	-1.90138	0.222242	0.640937	76627
Fbxw26	-1.44447	-1.32682	0.12735	0.521644	382109
Gm8700	-1.44397	-1.51565	0.268653	0.681986	667552
Cdh8	-1.44345	-1.51378	0.169788	0.580453	12564
Tacr1	-1.44292	-0.452003	0.0343037	0.27385	21336
Ppic	-1.44283	4.47055	2.29589e-08	4.68362e-06	19038
Cd33	-1.44271	-0.066812	0.0148123	0.160503	12489
Gm11961	-1.44226	-1.54091	0.0485912	0.329026	327860
Gask1b	-1.44179	-0.0526564	0.0636282	0.380969	68659
Ndst3	-1.44144	2.57528	7.13055e-05	0.0033307	83398
Ebf3	-1.44068	-0.308072	0.0200313	0.197468	13593
Tub	-1.44008	-0.108478	0.0794002	0.423977	22141
Scn10a	-1.43873	0.0780115	0.122849	0.517488	20264
Mroh2b	-1.43845	0.133848	0.0683676	0.394496	223825
Pcdh12	-1.43807	-0.192088	0.112013	0.497303	53601
Foxd2os	-1.43768	-0.922331	0.1764	0.588853	100040736
Prg2	-1.4369	-1.3414	0.123054	0.517552	19074
Gm19471	-1.43579	-1.06973	0.0953406	0.459641	100502956
Tex43	-1.43533	-1.43377	0.131066	0.527004	67343
Prmt8	-1.43445	-1.13719	0.128305	0.522844	381813
H2-M10.3	-1.43404	-1.7802	0.181892	0.596913	110696
Fmr1os	-1.43341	-1.92458	0.136287	0.535608	100038638
Spag16	-1.43163	-0.963403	0.1102	0.49342	66722
Gm8138	-1.43031	-1.13377	0.156959	0.56468	666502
Gm2619	-1.43029	0.737801	0.0655524	0.385561	100040135
Il7r	-1.42833	-1.06882	0.123494	0.517975	16197
Gm20043	-1.42785	-1.47054	0.244135	0.662211	100504070
Lrch2	-1.42779	-0.391186	0.0197436	0.195114	210297
Dpy19l2	-1.42771	-1.21116	0.237428	0.655887	320752
Gpc5	-1.4269	-0.843802	0.0880745	0.444288	103978
Olfr288	-1.42623	-1.25741	0.0779262	0.420827	545140
Cfap97d1	-1.42558	-1.51951	0.191878	0.609472	75437
Nt5dc2	-1.4255	2.03571	8.42869e-06	0.000606138	70021
Adarb1	-1.4253	4.87837	1.18461e-08	2.69122e-06	110532
Tex11	-1.42397	-1.38865	0.185176	0.601271	83558
4930438A08Rik	-1.42385	-1.14688	0.083888	0.434142	73988
Gm5523	-1.42356	-1.73495	0.222527	0.641025	433273
Rasgef1c	-1.42325	-0.986948	0.0651807	0.38531	74563
Raet1d	-1.42242	-0.808069	0.12671	0.521502	56554
Slxl1	-1.42119	-1.50698	0.200386	0.616705	75140
Marco	-1.42029	-0.83952	0.0779051	0.420826	17167
Cd209g	-1.41945	-1.53092	0.248046	0.66494	70192
Erg	-1.41873	-0.432041	0.142344	0.542976	13876
Itk	-1.41843	-0.325023	0.0753945	0.414301	16428
Npas3	-1.41831	-0.283282	0.0250012	0.225961	27386
Gm9928	-1.41816	-1.29041	0.147549	0.55271	100126874
Vmn2r125	-1.41669	-1.81184	0.219278	0.637089	670059
Emid1	-1.41617	-0.916689	0.138497	0.538166	140703
Catsperz	-1.41494	-1.49401	0.0973464	0.465546	67077
Mmp13	-1.41467	2.79224	0.0358752	0.280905	17386
Tnfaip6	-1.41359	2.56151	0.00157748	0.0337186	21930
Scn11a	-1.41293	0.0500373	0.0586282	0.36626	24046
Faiml	-1.41213	-2.01059	0.191661	0.609268	623459
Slc6a4	-1.41171	-0.508483	0.0208769	0.202706	15567
Wipf1	-1.41117	3.09332	0.00226604	0.0436022	215280
Krt5	-1.41094	-1.18308	0.163074	0.571992	110308
Gm5662	-1.41055	-1.11699	0.132664	0.529072	435337
Nlrp14	-1.41012	-1.35243	0.272576	0.686198	76858
9130213A22Rik	-1.40952	-1.33299	0.0712148	0.402865	100038433
Serpinb1b	-1.40943	-1.52554	0.194088	0.610538	282663
Shank3	-1.40888	2.12062	0.00117556	0.0272012	58234
Cbln4	-1.4082	-0.999332	0.149596	0.556065	228942
Gpr37	-1.40632	-1.40119	0.1853	0.601271	14763
Hydin	-1.4063	1.62374	0.0627316	0.379732	244653
Gm16793	-1.40604	-0.160534	0.0125318	0.144484	100504714
Igfbp7	-1.40569	7.53945	1.50577e-09	5.0244e-07	29817
Kcna2	-1.40557	0.133818	0.0863479	0.440536	16490
Tshr	-1.40549	-0.412004	0.0747527	0.41215	22095
Uts2b	-1.40545	-0.669985	0.122541	0.516802	224065
Ccdc177	-1.40494	-0.444942	0.106599	0.48661	380768
Gm3182	-1.40429	-1.55261	0.26212	0.677128	100041177
Ugt3a1	-1.40313	-1.26307	0.17256	0.58373	105887
Rfx8	-1.40299	-0.27242	0.0650223	0.385049	619289
Tex19.1	-1.40201	-1.6792	0.285455	0.70063	73679
Gm4759	-1.40186	-1.35164	0.206478	0.624532	209380
Ankk1	-1.3996	-1.36595	0.19462	0.611576	244859
Gm20326	-1.39907	-1.36674	0.171979	0.582919	100504643
Gm17746	-1.39848	-1.37992	0.14893	0.555486	432641
4933402N03Rik	-1.39836	-1.07088	0.074595	0.411621	233918
Fam214a	-1.39744	6.52961	3.82486e-10	1.73788e-07	235493
A730036I17Rik	-1.3973	0.322168	0.0201038	0.197604	329513
Pcp2	-1.39677	-1.52238	0.160425	0.568998	18545
Gpr137c	-1.39639	0.0464646	0.0148399	0.160506	70713
A530032D15Rik	-1.39636	2.58667	0.0959288	0.461345	381287
Fam71f1	-1.39616	-1.16842	0.0914528	0.453138	330277
Nckap1l	-1.39598	0.184783	0.0764229	0.417391	105855
Pi15	-1.39592	-0.703636	0.189223	0.60527	94227
Nlrp4e	-1.39584	-1.60054	0.116835	0.505662	446099
Serpine2	-1.39517	2.25243	0.00203967	0.0404936	20720
Ikzf3	-1.39472	0.580192	0.0124302	0.143562	22780
Bmp7	-1.39465	2.17234	0.00798306	0.107256	12162
Shox2	-1.39463	-1.39114	0.149062	0.555684	20429
Vmn2r38	-1.39456	-1.28636	0.116714	0.5056	434110
Zfp982	-1.39422	-0.0273391	0.00431731	0.0704586	195531
Smok2a	-1.39411	-0.560195	0.215322	0.632908	27263
Gm21312	-1.39344	-1.19796	0.140794	0.54097	100861901
Gm5878	-1.39249	-0.6911	0.0856259	0.438556	545861
P2rx2	-1.39246	1.3108	0.000130152	0.00533195	231602
Nat8l	-1.39218	2.1004	0.00913382	0.117204	269642
Olfm2	-1.392	1.78146	0.000152643	0.00589121	244723
Gm20098	-1.39113	-1.22453	0.2198	0.638032	100504169
Ush2a	-1.3908	1.23877	0.0601391	0.371064	22283
Cyp2j12	-1.39008	-1.4645	0.201807	0.619264	242546
Gm2016	-1.38998	-1.46052	0.145689	0.548722	100039042
Fam205a4	-1.38938	-0.436753	0.115805	0.503352	100043920
Gm21162	-1.38879	-1.19431	0.163613	0.572568	100861719
Adora3	-1.38859	-1.36618	0.166111	0.574847	11542
Chrng	-1.38857	-1.10775	0.223492	0.642188	11449
Gtf2a1l	-1.38802	-1.23573	0.148142	0.553892	71828
Cdh12	-1.38779	-1.15963	0.114759	0.501695	215654
Opn4	-1.38741	-1.66106	0.150635	0.55791	30044
Gm21075	-1.38732	2.59962	0.0565391	0.358721	100861610
Cdh23	-1.38587	2.43275	0.00135002	0.0301529	22295
Mrc1	-1.38538	1.9192	0.0141912	0.15666	17533
Grin2a	-1.38428	-0.418243	0.0915003	0.453138	14811
Slamf1	-1.38392	-1.00588	0.237475	0.655927	27218
2610027K06Rik	-1.38287	-0.862764	0.0820189	0.428868	69909
Slc34a1	-1.38247	-1.60729	0.208288	0.625312	20505
Lin7a	-1.38246	-0.8271	0.106543	0.486598	108030
Cpa5	-1.38214	-1.21866	0.213751	0.630982	74649
Tespa1	-1.38213	-1.25827	0.126165	0.520412	67596
Cd209b	-1.38192	-1.50465	0.294314	0.707919	69165
Slc4a10	-1.37988	-0.153384	0.0919238	0.454623	94229
Gm3669	-1.37987	-0.188734	0.106061	0.485544	100042103
Stab1	-1.37843	3.50957	1.40774e-08	3.0342e-06	192187
Muc19	-1.37839	2.22704	0.216259	0.634375	239611
Ptgs2os	-1.37728	-1.28993	0.218824	0.636603	320019
B3gat1	-1.37688	-1.0268	0.109384	0.49187	76898
Mir9-3hg	-1.37647	-1.1612	0.165184	0.574525	101694
Ccdc60	-1.37643	-0.832168	0.138245	0.538017	269693
Gm11757	-1.37625	-0.0362047	0.0871697	0.442085	623272
Gm4567	-1.37563	-0.71998	0.0994981	0.471154	100043645
Popdc3	-1.37539	-1.56881	0.133314	0.529786	78977
Zfp980	-1.37509	-0.167457	0.0954628	0.459878	100041379
Chst13	-1.37503	-1.38191	0.124033	0.518544	71797
Psg25	-1.37455	-1.76857	0.157205	0.564851	114868
Samsn1	-1.37431	-1.27296	0.218419	0.635888	67742
Tat	-1.37427	-0.862339	0.130738	0.526566	234724
Myh15	-1.37416	0.31707	0.129668	0.525418	667772
Kmo	-1.37408	-1.07598	0.105378	0.484191	98256
Ppp1r16b	-1.37388	0.395323	0.0132212	0.149649	228852
Pitx2	-1.3712	-1.42798	0.173683	0.585335	18741
Prdm13	-1.37078	-1.69852	0.265045	0.679397	230025
Hephl1	-1.37019	-0.262463	0.191982	0.609564	244698
AU015228	-1.36978	-1.24379	0.193768	0.610165	99169
Timp1	-1.36936	4.08914	5.15301e-07	6.47919e-05	21857
Gm8674	-1.36837	-1.78491	0.118356	0.509622	667507
Mup1	-1.36763	-1.15951	0.190293	0.60656	17840
Cd163l1	-1.36758	-0.655437	0.162322	0.570971	244233
Cntn4	-1.36655	-0.541172	0.095957	0.461369	269784
Gm6023	-1.36629	-1.71114	0.0689754	0.396252	547166
Tex47	-1.3661	-1.55758	0.200229	0.616705	70920
Spata31d1a	-1.36603	-1.02813	0.0818379	0.428868	72219
Cep170	-1.36583	6.36204	2.9994e-09	8.69042e-07	545389
C430049B03Rik	-1.36444	2.82371	7.9624e-06	0.000583911	72575
1700061I17Rik	-1.36421	1.24178	0.000533349	0.0150761	433646
Gm8221	-1.36392	-0.251167	0.154775	0.560735	666661
1700092E19Rik	-1.36313	-1.88776	0.316247	0.725046	73576
Cd22	-1.36309	-0.17677	0.0773931	0.419648	12483
Olfr1	-1.36197	-2.39497	0.367716	0.758966	258923
B230209E15Rik	-1.36189	-1.822	0.314038	0.723398	319752
Dmbx1	-1.36104	-0.750498	0.149317	0.556065	140477
Mybpc1	-1.35972	0.0950851	0.119161	0.511546	109272
Gria1	-1.35958	-0.396584	0.133478	0.529786	14799
Lrrc15	-1.35921	-0.105988	0.0313692	0.257792	74488
9130221F21Rik	-1.35916	-1.34322	0.136518	0.535885	330350
Bend4	-1.35914	0.267653	0.0214901	0.20586	666938
Btbd35f14	-1.35885	-2.3352	0.314044	0.723398	100040732
Itih3	-1.35848	-0.571564	0.150747	0.55791	16426
Nlrp4c	-1.35736	-1.7344	0.201922	0.619336	83564
Ggct	-1.35706	4.20991	0.000148114	0.00576089	110175
Gm8777	-1.35632	-1.13521	0.172655	0.58373	667712
Gm14230	-1.35623	-0.40726	0.0383294	0.29253	100504361
BC030867	-1.35606	-0.0477289	0.0187575	0.189143	217216
9330182O14Rik	-1.35488	-0.884637	0.171542	0.582135	328531
Pcdhb15	-1.35445	-0.6125	0.0443776	0.314164	93886
Grem1	-1.35418	1.38408	0.00388505	0.0647789	23892
Cyp2a4	-1.3523	-1.21519	0.369453	0.760827	13086
Gm10931	-1.35224	-1.26085	0.198594	0.615644	100316865
Colq	-1.35155	-0.362691	0.0293598	0.248917	382864
1700031M16Rik	-1.3515	-0.953184	0.127365	0.521644	73302
Pnma2	-1.35071	-0.953658	0.17738	0.589987	239157
C1qc	-1.35051	0.00166579	0.107297	0.487899	12262
Lpo	-1.34995	-0.398049	0.0965446	0.463414	76113
Cyp2b9	-1.34978	-0.837856	0.243493	0.661684	13094
Gm21304	-1.34956	-1.02298	0.323926	0.731744	100861891
Tnni3k	-1.34922	-0.281082	0.153452	0.559703	435766
Gm6348	-1.34917	-0.577372	0.143483	0.544621	622731
Pla2g4e	-1.34886	-0.20477	0.125352	0.519753	329502
Cyp2b23	-1.34791	-0.284169	0.197556	0.615009	243881
Synb	-1.34757	0.678917	0.0234906	0.218328	239167
Tbx5	-1.34752	-0.478469	0.171049	0.581576	21388
4931406B18Rik	-1.34703	-0.189508	0.183065	0.597956	74054
Gm6958	-1.34653	-0.909127	0.133608	0.529875	629242
1700010B08Rik	-1.34615	-1.35995	0.0928927	0.454945	75485
1700036A12Rik	-1.34527	-1.9686	0.267676	0.681608	100040447
E2f8	-1.34502	3.23341	4.28326e-05	0.00224165	108961
Nfatc4	-1.34495	3.36089	3.65221e-06	0.00031472	73181
Slc22a7	-1.34495	-1.44816	0.206492	0.624532	108114
Atp1a3	-1.34343	0.441508	0.0845112	0.436237	232975
Tmem273	-1.34336	-1.23674	0.105537	0.484476	69069
C1qtnf3	-1.3433	-0.613874	0.133491	0.529786	81799
Gm6351	-1.34223	-0.607557	0.112388	0.497419	622744
Oog2	-1.34196	-2.01115	0.407593	0.786293	381570
Gucy2f	-1.34173	-0.819317	0.199006	0.61567	245650
Cacna1s	-1.33963	0.809017	0.0777675	0.420424	12292
4921513I03Rik	-1.33946	-1.54206	0.0647318	0.384126	70874
Mpdz	-1.33944	4.01741	1.69278e-05	0.00105099	17475
Gm8094	-1.33942	-1.08998	0.150985	0.55791	666420
Stk32c	-1.33926	-0.375753	0.0268143	0.236011	57740
Esrrb	-1.33911	-0.923315	0.101658	0.474735	26380
Gm8108	-1.33901	-0.634193	0.0834667	0.432857	623078
Tbr1	-1.33838	-0.630799	0.0311297	0.256919	21375
Psg27	-1.33819	-0.930102	0.174082	0.585605	545925
Zeb2	-1.33782	4.27873	0.000511378	0.0146678	24136
Actn2	-1.33779	-0.269679	0.107891	0.489215	11472
Gm13304	-1.33712	-0.869753	0.187165	0.60342	100504346
BC107364	-1.33686	-1.65912	0.0710398	0.402445	329716
Gm732	-1.3367	-1.67205	0.215206	0.632893	213450
Sftpc	-1.33642	-2.13354	0.275277	0.689307	20389
Lilrb4a	-1.33632	-0.21523	0.123354	0.517871	14728
Myh8	-1.33629	-0.0948047	0.0941614	0.457082	17885
Gm20554	-1.33616	-0.670245	0.0847415	0.436499	328287
A230087F16Rik	-1.33601	-0.784675	0.0844816	0.436198	100503323
Tpo	-1.33527	-0.606643	0.169793	0.580453	22018
Hs6st2	-1.3347	1.19918	0.000965194	0.0235749	50786
Alpk2	-1.33444	0.125822	0.0950541	0.458904	225638
Pkn3	-1.33252	4.01517	1.47388e-09	5.0244e-07	263803
Gm3364	-1.33236	-1.98185	0.24866	0.665309	100041481
Ntrk3	-1.33178	-0.293757	0.185152	0.601271	18213
Gm10636	-1.33176	-0.59007	0.0898212	0.449115	100038607
Kif7	-1.33142	0.419139	0.00363051	0.0618765	16576
Cdh15	-1.33136	-0.413571	0.0175961	0.181548	12555
Epyc	-1.33078	-1.53091	0.269602	0.683053	13516
Hsd3b2	-1.33013	-0.832113	0.206311	0.624532	15493
Gm14022	-1.32973	-0.999356	0.0724405	0.406463	100503381
Atp2b4	-1.3297	5.8453	3.64123e-06	0.00031472	381290
Chsy1	-1.32965	5.64904	9.3615e-06	0.000667393	269941
Ctcfl	-1.3294	-0.319189	0.0914693	0.453138	664799
Susd5	-1.32893	-1.16348	0.116814	0.505662	382111
Nlrp3	-1.32852	-0.00442522	0.110807	0.495031	216799
Angptl2	-1.32851	5.08723	6.51747e-05	0.00309495	26360
Ptger3	-1.32749	3.40474	0.000346138	0.0109426	19218
Vwa2	-1.32698	-0.394859	0.139419	0.538929	240675
1700113H08Rik	-1.32637	-1.3878	0.267737	0.681608	76640
Cd300ld5	-1.32587	-0.729471	0.0925081	0.454623	100043125
Btbd35f11	-1.32533	-0.844615	0.131356	0.527618	668958
Ankrd36	-1.32498	-0.0415525	0.15002	0.556643	76389
Sgo2b	-1.32491	-1.33575	0.125816	0.520342	244495
Gpr26	-1.32476	-1.52422	0.153423	0.559703	233919
Cdk5r2	-1.32381	0.656973	0.011712	0.138285	12570
Kank4	-1.32348	-0.392671	0.154211	0.560196	242553
Cyp1a1	-1.32316	-1.39509	0.159894	0.567981	13076
Gm10723	-1.32289	-0.913867	0.184445	0.599973	100038361
4921509C19Rik	-1.32288	-1.20649	0.142268	0.542893	381393
Ubash3b	-1.32237	3.3908	9.8107e-09	2.33495e-06	72828
Fbxw28	-1.32161	-1.5809	0.29871	0.709916	668758
Crnde	-1.32152	-0.529161	0.0393526	0.296456	71296
Nutm1	-1.32152	-0.0454681	0.0310247	0.25683	213765
Ccr5	-1.3212	-0.986321	0.187602	0.603854	12774
1700012B07Rik	-1.32105	-1.22812	0.207125	0.624844	69324
Fbxw25	-1.32095	-1.44818	0.173872	0.585389	546160
Adamts18	-1.3205	0.948493	0.0146297	0.159128	208936
Dbx2	-1.32009	-1.98924	0.173901	0.585389	223843
Tmprss11f	-1.31998	-1.16499	0.252143	0.667751	243083
Fndc1	-1.31988	2.41176	0.0631278	0.380588	68655
Ntm	-1.31958	-0.199255	0.0296182	0.249737	235106
Gm3298	-1.31942	-1.17639	0.130675	0.526566	100041374
Gm11237	-1.31921	-1.08392	0.221587	0.640792	623197
Ccl2	-1.3192	0.969849	0.00488936	0.0769065	20296
4933434M16Rik	-1.3187	-1.69013	0.169476	0.579866	71203
Il3	-1.31862	-0.493269	0.086962	0.441591	16187
Fibcd1	-1.3185	0.718378	0.00823742	0.109424	98970
Hey2	-1.31834	-0.49233	0.0316712	0.259602	15214
Cd300ld	-1.31831	-0.933273	0.121583	0.515573	217305
Draxin	-1.31763	-0.305721	0.0713649	0.403372	70433
Chn1	-1.31733	2.68098	0.00013105	0.00534685	108699
Ptpn22	-1.31729	1.93911	0.000229937	0.0079669	19260
1700099I09Rik	-1.31701	1.15661	0.0533084	0.345123	76624
Asz1	-1.31683	5.19919	0.00292637	0.0528013	74068
Gm7085	-1.31681	-1.04444	0.0366964	0.284474	632352
Lrrc8c	-1.31633	4.83714	4.94187e-07	6.29285e-05	100604
Gm14002	-1.31627	-1.58822	0.227167	0.645273	100502853
Slc13a3	-1.31621	-0.833372	0.21467	0.632221	114644
Enthd1	-1.31615	-0.619871	0.0814228	0.42837	383075
Tbxas1	-1.31586	2.30982	2.11253e-05	0.00125696	21391
Gm2457	-1.31547	-1.23999	0.138646	0.538213	100039848
St8sia1	-1.31506	-0.198149	0.101223	0.473616	20449
Il11	-1.31472	0.582009	0.00498124	0.0776793	16156
Rpl3l	-1.31425	-0.503203	0.0253157	0.228173	66211
Adamtsl3	-1.31417	1.11973	0.01426	0.157073	269959
Dyrk3	-1.31341	3.81545	6.41687e-07	7.72808e-05	226419
Lhfpl3	-1.31335	-1.9265	0.269193	0.682523	269629
Slc27a5	-1.31293	-1.08597	0.0721871	0.405954	26459
Fbn1	-1.3116	4.03672	0.018997	0.190536	14118
4933427E13Rik	-1.31142	-1.58404	0.333682	0.739144	71234
1700003C15Rik	-1.31087	-1.68948	0.319566	0.729008	69345
Gpr153	-1.31057	3.22586	5.06558e-06	0.000410004	100129
Jsrp1	-1.30972	-0.763114	0.0431021	0.310218	71912
Ube2ql1	-1.30948	-0.18877	0.0654833	0.385536	76980
Zscan4f	-1.30849	-0.864624	0.218504	0.635888	665902
Abca12	-1.30813	0.0578026	0.123795	0.518195	74591
Fhod3	-1.308	1.78595	0.000642591	0.017337	225288
Mypn	-1.30774	-0.115013	0.19567	0.612775	68802
Tmem151b	-1.30768	1.27046	0.000279155	0.00927053	210573
4930519D14Rik	-1.30633	-1.85844	0.296731	0.709147	75090
Agxt	-1.30585	-0.622223	0.0408907	0.302854	11611
Wnt9a	-1.30576	2.42819	0.00708385	0.099313	216795
Synpo2	-1.30547	0.250217	0.0227748	0.213662	118449
Trav6n-7	-1.30547	-1.92239	0.196822	0.613772	100126456
Spata4	-1.30509	-1.31067	0.351187	0.749314	69281
Col22a1	-1.30478	0.662699	0.133022	0.529545	69700
Dock2	-1.30367	0.80482	0.128091	0.522397	94176
Fermt2	-1.30362	5.40958	5.96084e-07	7.26641e-05	218952
Sacs	-1.30306	1.66043	0.00214592	0.0422255	50720
Otof	-1.30182	1.03944	0.0133762	0.150904	83762
Adarb2	-1.30088	-0.554889	0.165913	0.574847	94191
Gm10654	-1.3004	-0.133203	0.026591	0.235016	665828
Fabp12	-1.29913	-0.996364	0.104211	0.481597	75497
Nt5e	-1.29905	7.71341	7.33108e-05	0.00340053	23959
Gm3095	-1.29751	-0.664634	0.157515	0.565559	100041012
Slc46a2	-1.29739	-1.55765	0.216594	0.634469	30936
Zfp660	-1.29732	-1.12488	0.0661711	0.387491	666257
Armc2	-1.2972	-0.104403	0.175983	0.588309	213402
Hlx	-1.29685	0.517722	0.0119274	0.139773	15284
Tiam2	-1.29664	6.01217	3.27266e-06	0.000293395	24001
Bmp1	-1.29652	6.91074	5.11058e-06	0.000410644	12153
Cdh16	-1.29624	-0.117019	0.0571802	0.361412	12556
1700029F12Rik	-1.2959	-1.54568	0.327254	0.734117	66479
Rxfp2	-1.29558	-0.835812	0.125229	0.519753	140498
5330413P13Rik	-1.29533	-0.797559	0.227301	0.645273	414081
Olfr521	-1.29529	-1.56431	0.196613	0.613744	258353
Pcp4l1	-1.29509	-1.15822	0.100383	0.472712	66425
Tnfrsf26	-1.29472	-0.826426	0.0652254	0.38531	244237
Nhlh2	-1.2942	-1.36215	0.294771	0.708129	18072
Allc	-1.29375	-1.02418	0.110938	0.49517	94041
Ptgs2	-1.29227	6.23808	0.000581897	0.0161126	19225
Pdzph1	-1.29183	-0.582606	0.223172	0.641873	69239
Colec12	-1.2912	1.00028	0.0372313	0.287386	140792
Dsg1a	-1.29017	-0.797334	0.166891	0.57645	13510
Ntng2	-1.28844	-0.556381	0.0759436	0.416191	171171
AI504432	-1.28815	-0.907505	0.155395	0.562447	229694
Pde11a	-1.2881	-0.130736	0.145929	0.549006	241489
Tmem211	-1.28754	-1.55128	0.158022	0.565958	333048
Bpifb6	-1.28753	-0.724296	0.128739	0.523901	228796
Vmn2r113	-1.28715	-0.825789	0.141054	0.54139	434701
Prtg	-1.28653	0.492817	0.0618186	0.377545	235472
Sema3g	-1.28646	0.0246552	0.0261483	0.232893	218877
Il20ra	-1.28552	-1.46045	0.261781	0.677017	237313
Sel1l2	-1.2855	-1.21744	0.191764	0.609306	228684
Nr2e1	-1.28547	-0.812092	0.113045	0.497593	21907
Gdpd5	-1.28446	6.18564	1.77596e-07	2.66705e-05	233552
Slc14a1	-1.28377	0.0769369	0.110324	0.493621	108052
Pkdrej	-1.28289	-0.49404	0.0370266	0.286397	18766
Cfap44	-1.28201	0.654314	0.0975455	0.465981	212517
Slc16a14	-1.28183	-1.21433	0.174741	0.586259	71781
Ggt5	-1.2816	-0.569496	0.108563	0.490151	23887
Hoxb4	-1.28006	-1.37398	0.112378	0.497419	15412
Klkb1	-1.27897	-0.829208	0.108296	0.489587	16621
4933405E24Rik	-1.27894	0.906684	0.0764999	0.417391	71056
Cldn34c1	-1.27856	-0.702507	0.0525935	0.342492	73061
Gm17821	-1.27797	-0.601513	0.136865	0.535886	100316870
F7	-1.27787	-0.775543	0.0814653	0.428437	14068
4930503L19Rik	-1.27783	1.4641	0.00221849	0.043202	269033
Tgfb2	-1.27668	3.31355	0.00140679	0.0311802	21808
Pglyrp2	-1.27665	-0.700642	0.144736	0.547091	57757
Garem2	-1.27649	-0.332054	0.055487	0.354573	242915
4930556C24Rik	-1.27641	-1.82382	0.205355	0.623621	75310
Lhx1	-1.27617	-1.02551	0.212031	0.629353	16869
Etos1	-1.27615	-1.21503	0.194148	0.610573	114660
Col12a1	-1.27601	5.96289	0.00238009	0.0452307	12816
Col6a4	-1.27595	0.650041	0.139284	0.538703	68553
Myod1	-1.27579	-1.47203	0.197652	0.615154	17927
Gys2	-1.2757	-0.88823	0.158217	0.566012	232493
Cnr1	-1.27534	-0.336066	0.0932881	0.455646	12801
Vmn2r56	-1.27531	-1.3405	0.212347	0.629353	629079
Mapk4	-1.27433	1.88418	0.00887567	0.115073	225724
Gm17695	-1.27425	-0.671134	0.0897729	0.449022	100504484
Hrh3	-1.27348	-1.67864	0.152845	0.559323	99296
Gabra2	-1.27273	-0.977418	0.227389	0.645273	14395
Gpr37l1	-1.27171	-0.96856	0.0956036	0.460223	171469
Gm13553	-1.27084	-1.77759	0.188675	0.604888	100504023
Aspn	-1.27033	-1.34143	0.0911865	0.452755	66695
Irf5	-1.27015	0.570951	0.0042911	0.070088	27056
Colgalt2	-1.26978	-0.482151	0.0627569	0.379732	269132
BC051019	-1.26967	-0.821541	0.0610472	0.375012	57355
Abi3bp	-1.26861	1.43875	0.0373074	0.287693	320712
Myl1	-1.26849	-1.20536	0.092663	0.454623	17901
Cldn6	-1.2678	5.41494	1.86083e-09	6.00026e-07	54419
Gm6567	-1.26668	-1.56026	0.343737	0.744183	625243
Zfp819	-1.26659	-1.16159	0.197231	0.614324	74400
Apbb1ip	-1.26646	-0.0346285	0.089002	0.446982	54519
Clec7a	-1.26635	1.58532	0.00396317	0.0656979	56644
Minar2	-1.26614	-1.26536	0.161678	0.569966	225583
Wdr17	-1.26433	-0.556576	0.220032	0.638142	244484
4930488B22Rik	-1.26325	-1.52002	0.289759	0.703531	74971
Actg2	-1.26316	-0.47395	0.0723915	0.406463	11468
Gm10752	-1.26306	-0.81191	0.14966	0.556065	100038558
BC024386	-1.26276	-1.62164	0.204692	0.622485	212965
Cntnap5a	-1.26274	-0.836521	0.191797	0.609313	636808
Hsd11b1	-1.26219	-0.28712	0.195324	0.61264	15483
H60b	-1.26187	-0.634313	0.108117	0.489429	667281
Gm3558	-1.26073	1.31871	0.0536976	0.346745	100041874
Gm13889	-1.26058	0.702642	0.00651389	0.0939579	620695
Cyp4a29	-1.26026	-1.07714	0.233	0.652833	230639
Cyp4a12a	-1.25963	-1.14131	0.241459	0.660537	277753
Sec14l3	-1.25959	-0.718664	0.255675	0.670619	380683
Wdr64	-1.25959	-0.16529	0.162379	0.570971	75820
Gm1966	-1.25958	-0.31161	0.1387	0.538213	434223
Cfap58	-1.25928	-0.425215	0.109884	0.492886	381229
Cntnap3	-1.2591	-0.892184	0.291923	0.706724	238680
Slc22a6	-1.2591	-0.654047	0.131377	0.527618	18399
Insm2	-1.25905	-0.955655	0.0489489	0.330046	56856
4930547M16Rik	-1.25849	-1.64248	0.113905	0.499703	75299
Myo18b	-1.25838	0.491994	0.159096	0.567172	74376
Pcdhb1	-1.2581	-1.35052	0.153623	0.559703	93872
Rnf144a	-1.25808	0.160996	0.0991752	0.470841	108089
Nepn	-1.25801	-0.85822	0.118864	0.510821	66650
Dthd1	-1.25744	-1.67935	0.127687	0.521813	100322896
Hpd	-1.25694	-1.21439	0.070534	0.400487	15445
Sh2d5	-1.25667	4.26821	1.21819e-07	1.94833e-05	230863
AI314278	-1.25654	-0.961497	0.267266	0.681267	101521
Gm13498	-1.25624	-0.304442	0.0471847	0.324327	227885
Tmem145	-1.25621	-0.244952	0.111912	0.497231	330485
Fam221b	-1.25536	-1.57923	0.21381	0.630982	242408
Gm16488	-1.2552	-1.35533	0.170536	0.581248	791267
Gm5639	-1.25515	-0.641593	0.0626037	0.379495	434795
Ghrhr	-1.25501	-0.929834	0.23534	0.654398	14602
Rasl11b	-1.25479	1.95217	0.00012786	0.00530328	68939
Tectb	-1.25433	-0.785383	0.161562	0.56968	21684
Serpina3a	-1.25429	-1.71067	0.350429	0.748645	74069
F2r	-1.25425	7.09597	6.91128e-05	0.00326644	14062
Ptpn5	-1.2539	-0.288966	0.109989	0.493027	19259
Avpr1b	-1.25383	-0.63599	0.0983615	0.468235	26361
Sim2	-1.25377	-0.580605	0.158386	0.566347	20465
Atp13a5	-1.25372	-0.954757	0.224709	0.643442	268878
Il12a	-1.25346	-1.69527	0.161354	0.56968	16159
H2al3	-1.2534	-0.739517	0.170855	0.581576	385317
Apln	-1.25311	-0.286954	0.0804547	0.426527	30878
Lipi	-1.25234	-1.31247	0.222947	0.641564	320355
Chst2	-1.25205	5.57271	0.0010287	0.0246591	54371
Zp3r	-1.25193	-1.106	0.121211	0.515385	22789
Osbp2	-1.25134	3.07662	8.83649e-07	9.98075e-05	74309
AY512915	-1.25108	-1.62652	0.30198	0.71317	414067
Rspo2	-1.25087	-1.82883	0.413329	0.789718	239405
Traf1	-1.25065	3.7208	1.16414e-05	0.000788933	22029
Gm2101	-1.24998	-0.282577	0.215992	0.63399	100039208
8430423G03Rik	-1.24969	-0.958627	0.237726	0.656052	71473
Gm9125	-1.2494	-1.24903	0.227088	0.645273	668359
4930432E11Rik	-1.24938	1.35467	0.0720445	0.40538	243900
9630028B13Rik	-1.24894	-0.876462	0.0787823	0.423155	319562
Gjd4	-1.24866	-1.506	0.0871948	0.442099	225152
Tph1	-1.24829	3.42569	0.00068079	0.0181471	21990
Shroom4	-1.24761	3.28643	7.83985e-06	0.000578355	208431
Vmn2r42	-1.24754	-0.878525	0.22905	0.646916	22310
Aldh1a2	-1.24667	1.59455	0.00474022	0.0753311	19378
Trim55	-1.24546	-1.21445	0.174395	0.586022	381485
Pinc	-1.24519	-1.84141	0.236643	0.654987	723792
Kcng4	-1.24517	-0.811654	0.246354	0.663458	66733
Myom2	-1.24501	0.0407533	0.18049	0.594864	17930
Trbc2	-1.24477	1.99167	0.000222591	0.0077662	100125263
Gm38425	-1.24446	-1.88997	0.281585	0.696558	100503280
Gm14635	-1.24356	-2.10434	0.241004	0.660021	100043946
Klf8	-1.24344	0.209443	0.0227232	0.213378	245671
Zfp934	-1.24316	0.827401	0.0012137	0.0278261	77117
Il24	-1.24053	0.482524	0.0146219	0.159128	93672
Tex21	-1.24045	-1.13716	0.259868	0.675211	80384
Gm5801	-1.24021	-0.896156	0.0605859	0.372802	545056
Tdgf1	-1.24011	-1.6853	0.170379	0.581248	21667
Cd300ld2	-1.23994	-0.779111	0.316303	0.725093	629970
Gm2165	-1.23887	-0.571729	0.16057	0.568998	100039334
Pabpc4l	-1.23744	-0.478231	0.127849	0.521947	241989
Emx2	-1.23699	-1.60137	0.209409	0.626812	13797
Cntnap5c	-1.23663	-0.601479	0.244581	0.662211	620292
Hes3	-1.23635	-1.15891	0.153039	0.559323	15207
Tacr2	-1.23588	-0.38846	0.088093	0.444288	21337
Slc36a1os	-1.23567	-1.43894	0.298168	0.709765	74045
Nphs2	-1.23553	-0.761476	0.249497	0.666125	170484
Btbd35f9	-1.23472	-1.67622	0.295791	0.708799	100862369
Mmd	-1.23465	2.78522	0.00373667	0.0631475	67468
Prss16	-1.23279	0.335896	0.0215351	0.206094	54373
Cfap65	-1.23206	0.465858	0.135075	0.533364	241116
Fat3	-1.23041	4.13025	0.00645633	0.0936018	270120
Thsd1	-1.23021	2.85003	0.000450182	0.0133929	56229
Podnl1	-1.23004	1.41593	0.0173398	0.180066	244550
Slc22a8	-1.22988	-0.87282	0.217391	0.634794	19879
Aatk	-1.22976	1.84827	0.0214885	0.20586	11302
Myh2	-1.22969	0.00937364	0.196612	0.613744	17882
F11	-1.22927	-0.581848	0.130871	0.526566	109821
Adam21	-1.22854	-0.999325	0.0525746	0.34248	56622
Cd93	-1.22773	1.8016	0.0722109	0.405973	17064
Neu4	-1.22761	-1.52305	0.351395	0.749422	241159
Chn1os3	-1.22728	0.378855	0.0144936	0.158414	329427
Pdgfb	-1.2271	6.96558	1.17887e-05	0.000793535	18591
Treml4	-1.22708	-1.04293	0.242132	0.660775	224840
2810032G03Rik	-1.22683	-1.98456	0.172324	0.583617	72669
Col9a1	-1.22654	-0.340695	0.250763	0.666656	12839
Ms4a7	-1.22629	-1.7573	0.188964	0.605097	109225
Wdfy4	-1.22608	1.3236	0.134839	0.533052	545030
Otos	-1.22542	-2.08866	0.426144	0.79779	260301
Lhx8	-1.22541	-1.20963	0.199086	0.61567	16875
9330154J02Rik	-1.22519	0.140363	0.00753272	0.10302	442799
Ccr1	-1.22424	-0.559788	0.155169	0.56178	12768
C5ar1	-1.22398	-1.02021	0.144841	0.547279	12273
Epha3	-1.22274	0.29635	0.0717323	0.404131	13837
Mapk10	-1.2222	0.343717	0.0867284	0.441077	26414
Shisa4	-1.22176	2.31118	0.000145043	0.00569686	77552
Krt90	-1.22169	-0.756499	0.115034	0.50202	239673
Tdrd6	-1.22163	0.302761	0.0434571	0.311048	210510
Cpxm1	-1.22119	1.07178	0.0360472	0.281616	56264
Fbxl13	-1.22083	-0.693515	0.130272	0.526461	320118
Slc17a3	-1.22074	-0.315311	0.288182	0.702174	105355
Slc6a13	-1.22066	-0.820109	0.253068	0.667992	14412
Ramp1	-1.22052	4.22548	1.30758e-05	0.000851504	51801
Sohlh2	-1.21994	-1.09527	0.194843	0.611987	74434
Cpz	-1.21963	-1.05543	0.32556	0.732508	242939
Slc47a2	-1.21923	-1.21512	0.317559	0.726721	380701
Pdlim4	-1.21902	4.50556	3.1141e-08	5.98625e-06	30794
Ryr1	-1.21895	1.86558	0.0757553	0.415615	20190
Rxfp1	-1.21709	-1.25678	0.266605	0.680716	381489
Kcnmb4	-1.21708	-0.368051	0.0724667	0.406463	58802
Dubr	-1.21703	0.656934	0.0245385	0.223413	68190
Gm6634	-1.21684	1.42897	0.00424252	0.0693512	625901
Chrna6	-1.21532	-1.37625	0.29647	0.709147	11440
A130050O07Rik	-1.21485	0.700674	0.0904626	0.45105	320138
Fgd1	-1.21429	3.70203	4.74742e-06	0.000388977	14163
Slc24a1	-1.21406	-0.019666	0.057797	0.363265	214111
Slco5a1	-1.21362	3.57697	0.00089569	0.0222997	240726
Glyatl3	-1.21284	-1.76692	0.159228	0.567172	435528
Cd1d2	-1.21283	-0.994116	0.222366	0.640937	12480
Zpld2	-1.2127	-0.44619	0.123874	0.518403	665186
Abca13	-1.21254	0.708393	0.124676	0.519553	268379
Gm20765	-1.21247	-1.16349	0.242834	0.661228	637578
Ramp2	-1.2116	-0.684979	0.142434	0.543066	54409
Rhoh	-1.21146	-1.09196	0.117333	0.506325	74734
Dpysl5	-1.21134	0.988018	0.0113221	0.135136	65254
Fsip1	-1.21125	-0.972104	0.132835	0.529148	71313
Akap12	-1.21091	6.5427	0.0109579	0.132369	83397
Galnt16	-1.21072	-0.139291	0.0559929	0.357015	108760
4930413E15Rik	-1.20968	-1.84523	0.423605	0.796406	74627
Aanat	-1.20946	1.96455	0.0159328	0.16898	11298
Npas1	-1.20797	-0.250009	0.0279701	0.241238	18142
Trim60	-1.20758	-1.79212	0.322328	0.730517	234329
Lncbate1	-1.20725	-2.03918	0.282532	0.697496	109215
Slc14a2	-1.20701	0.107131	0.190341	0.606614	27411
Ankle1	-1.20687	0.448175	0.014673	0.159425	234396
Ano4	-1.20666	0.0331064	0.0735705	0.408534	320091
Dbx1	-1.20658	-1.49687	0.323137	0.731194	13172
Dok5	-1.20657	-0.700033	0.327531	0.73418	76829
Chil3	-1.20649	-0.85027	0.1282	0.522629	12655
Dnah3	-1.20649	1.07771	0.0737504	0.409106	381917
Olfr78	-1.20505	-1.65274	0.31887	0.72822	170639
Topaz1	-1.20475	-0.7737	0.253284	0.668144	671232
Tnnc1	-1.2047	-0.401459	0.0491123	0.330257	21924
Gm3373	-1.20464	0.389369	0.062553	0.379495	100036568
Cnga1	-1.20454	-1.63295	0.326393	0.733006	12788
4933427D06Rik	-1.20427	-0.957627	0.159204	0.567172	232217
Pate2	-1.20389	-1.16981	0.168931	0.578961	330921
Scrt2	-1.20327	-0.836919	0.153575	0.559703	545474
Sox11	-1.20311	7.41407	3.69603e-07	4.79812e-05	20666
Gm15448	-1.20253	-1.87659	0.191707	0.609306	100041146
Syt6	-1.20236	-0.792735	0.267826	0.681608	54524
Pou2f2	-1.20209	1.00369	0.0119433	0.139877	18987
4930555G01Rik	-1.20203	-1.42145	0.263922	0.67866	108978
Myocos	-1.20163	-1.55167	0.123587	0.517975	100038657
Pkp1	-1.20037	6.63525	7.99048e-05	0.00365551	18772
Hdc	-1.20018	-0.866341	0.103052	0.478231	15186
4932412D23Rik	-1.20001	-1.0822	0.217854	0.634846	75722
Pln	-1.19893	-0.197126	0.0572269	0.361479	18821
Pcdhb10	-1.19747	-1.24121	0.119525	0.512338	93881
Prrg3	-1.19727	-0.157703	0.0413651	0.304594	208748
Svep1	-1.19718	1.55535	0.0785626	0.422551	64817
C730036E19Rik	-1.19708	-1.60852	0.249564	0.666125	402734
Nsun7	-1.19669	-0.087384	0.0342568	0.273616	70918
Prodh2	-1.19662	-0.571763	0.106748	0.486763	56189
Slco1a6	-1.1966	-1.63059	0.122881	0.517488	28254
Procr	-1.19605	3.76035	5.01449e-07	6.34491e-05	19124
Clec9a	-1.19566	-0.948459	0.138982	0.538213	232414
Ddr2	-1.19546	1.2228	0.0631195	0.380588	18214
Shisa9	-1.19541	-1.09018	0.208287	0.625312	72555
A930011G23Rik	-1.19478	-0.624378	0.189545	0.605435	319818
S1pr5	-1.19477	-1.39036	0.221766	0.640937	94226
Gm13871	-1.19428	-0.430935	0.109834	0.492772	667780
Tpbg	-1.19423	4.54845	5.25244e-07	6.56292e-05	21983
Dlx3	-1.19418	-0.509	0.151615	0.558002	13393
Gm8773	-1.19406	-1.74603	0.379646	0.768674	667705
Col6a6	-1.19356	0.879964	0.113473	0.498914	245026
Tlr1	-1.19324	-1.39832	0.149695	0.556065	21897
Lhfp	-1.19303	0.412056	0.141222	0.54139	108927
Lama3	-1.19289	9.20776	1.86545e-05	0.00114049	16774
Ccn4	-1.19272	2.99226	0.000554936	0.0155818	22402
Usp13	-1.19238	1.56082	0.0122661	0.142368	72607
Ces1a	-1.19227	-0.935593	0.177146	0.589659	244595
Morrbid	-1.19053	3.75676	4.01076e-05	0.00213821	100043424
Irx6	-1.19019	-0.993564	0.249078	0.66545	64379
Acsm4	-1.18988	-0.831487	0.150792	0.55791	233801
Foxf2	-1.18983	-0.974534	0.0996304	0.471373	14238
Prss42	-1.18937	-1.52159	0.29182	0.706724	235628
Ms4a14	-1.1893	-1.13249	0.220959	0.639833	383435
Srrm4os	-1.18906	-1.69561	0.395176	0.778503	76798
Tmod1	-1.18894	0.89469	0.00770958	0.105145	21916
Gm15080	-1.18851	-1.71243	0.295817	0.708799	666184
Gm10610	-1.18828	-1.80333	0.378908	0.767947	100038384
Gm13544	-1.18782	-1.43764	0.324606	0.731863	100502932
Tph2	-1.18753	-0.859832	0.175677	0.588111	216343
Lrrc32	-1.1869	1.80193	0.0139313	0.155075	434215
Gcm1	-1.18636	-0.924522	0.296385	0.709147	14531
Slc5a4a	-1.18512	-0.332478	0.0994915	0.471154	64452
T2	-1.18502	-0.843139	0.0810427	0.427526	21331
Snap91	-1.18459	-0.281705	0.141747	0.541866	20616
Runx3	-1.18454	0.586005	0.0228362	0.213937	12399
Pdgfra	-1.1845	1.44157	0.0266601	0.235212	18595
Elfn2	-1.18418	-0.924385	0.203316	0.620983	207393
Ceacam19	-1.18412	-0.541135	0.126108	0.520412	319930
Ctsg	-1.18286	-1.18544	0.261246	0.676934	13035
Casp14	-1.18259	-0.931397	0.268755	0.681986	12365
Cdhr1	-1.18231	-0.215769	0.114535	0.501178	170677
4921509O07Rik	-1.18208	-1.19029	0.31274	0.722417	70917
Pde6c	-1.18202	-0.251219	0.103913	0.480555	110855
Greb1	-1.18202	1.15282	0.150765	0.55791	268527
Adcy7	-1.18161	2.48226	0.000154952	0.00595174	11513
E430016F16Rik	-1.18088	-1.46801	0.325373	0.732508	414121
D5Ertd577e	-1.18011	-1.1534	0.202793	0.620553	320549
Itgb2	-1.17959	0.655399	0.0728511	0.407282	16414
Slc26a7	-1.1795	-1.23856	0.187467	0.603731	208890
Nmnat2	-1.17945	2.27235	0.00407805	0.0671568	226518
Cpt1b	-1.17925	-1.28334	0.152297	0.558691	12895
Prok2	-1.17804	-1.84824	0.179189	0.592908	50501
Cass4	-1.17774	-1.27056	0.398775	0.781354	320664
Syce1	-1.17724	-0.490312	0.217795	0.634838	74075
Gm7457	-1.17703	-0.952055	0.20305	0.620861	665037
Gm21123	-1.17666	-1.28592	0.238631	0.657212	100861673
Prss34	-1.17661	-1.80939	0.292283	0.70685	328780
Pde1b	-1.1765	-0.222187	0.204672	0.622485	18574
Gm10731	-1.17615	-0.75238	0.153098	0.559323	100039043
Slitrk5	-1.17568	-1.33816	0.172766	0.58373	75409
Kif1a	-1.17567	3.35048	0.00645447	0.0936018	16560
AA792892	-1.17533	-1.36787	0.236506	0.65497	100554
3300005D01Rik	-1.1753	0.114907	0.0784804	0.422223	78512
Gli1	-1.17529	-0.324345	0.0639277	0.381619	14632
Doc2b	-1.17486	3.29381	0.000200959	0.00723886	13447
Gm7792	-1.17454	-0.474066	0.390861	0.776286	665802
Chrna2	-1.17411	1.34662	0.00486325	0.0766164	110902
Gli3	-1.17389	1.10435	0.0295223	0.249673	14634
Mir763	-1.17387	1.05936	0.03104	0.256851	791076
Tmem114	-1.17335	-1.66901	0.275311	0.689307	74720
Inpp4b	-1.17327	2.86224	0.000204836	0.00732754	234515
Layn	-1.17276	1.07302	0.00235467	0.0448329	244864
3110053B16Rik	-1.17264	-0.642812	0.052838	0.343594	382686
Itih5l-ps	-1.17248	-0.970226	0.15817	0.566012	634882
Art2a	-1.17171	2.04802	0.00671838	0.0957366	11871
Cyp2d12	-1.17064	-1.80794	0.33058	0.737195	380997
Igfn1	-1.17054	0.634214	0.0683678	0.394496	226438
9230105E05Rik	-1.16991	2.48795	0.00501606	0.0780173	320626
Lgr5	-1.16951	3.38704	0.00528081	0.0811483	14160
Fgf8	-1.16948	-1.11269	0.0811957	0.427737	14179
Gm6277	-1.16861	-1.62581	0.157164	0.564815	621998
Cald1	-1.16852	7.64422	1.30368e-05	0.000851504	109624
Bpifa1	-1.16832	-1.51436	0.363715	0.756733	18843
Cxcl2	-1.16785	4.31597	0.0353624	0.278881	20310
Gm20236	-1.16751	4.0965	5.32837e-05	0.00264987	100504453
C230037L18Rik	-1.1674	-0.598626	0.0488364	0.329945	100532730
Kctd19	-1.16723	-0.969628	0.105656	0.4846	279499
Tunar	-1.16707	-1.8747	0.375265	0.765355	69952
Myoz3	-1.16666	0.306225	0.0247361	0.22407	170947
5830411N06Rik	-1.1661	-1.24384	0.294505	0.707919	244234
Ect2l	-1.16603	-0.213261	0.0515493	0.338559	100045792
Acsbg1	-1.16573	5.35543	6.25734e-08	1.0692e-05	94180
Syt10	-1.16559	-1.70769	0.26324	0.678056	54526
Mup8	-1.16553	-1.49108	0.367149	0.758742	100041687
Serpinb9h	-1.16501	-0.44812	0.284059	0.699632	544923
Atp2b3	-1.165	-0.702546	0.134409	0.532207	320707
Epha10	-1.16486	-0.488863	0.190411	0.606644	230735
Krt26	-1.16459	-1.01505	0.256744	0.67131	320864
Rag1	-1.16453	-0.79783	0.3202	0.729592	19373
Zfp449	-1.16245	0.229111	0.0263867	0.23435	78619
Abca9	-1.16208	0.445302	0.163345	0.572278	217262
Raet1e	-1.16169	1.77631	0.0121147	0.141186	379043
Gm1153	-1.16097	-0.12671	0.13267	0.529072	382364
Ccdc178	-1.16081	-0.992116	0.196825	0.613772	70950
Il12b	-1.16079	-1.49251	0.241757	0.660727	16160
Il20	-1.16015	-1.67645	0.261327	0.676934	58181
Eya4	-1.15993	-0.555945	0.240025	0.659011	14051
CK137956	-1.15945	-0.992139	0.166098	0.574847	635169
Cd248	-1.15939	1.08785	0.0570382	0.361018	70445
Olfr279	-1.15932	-1.53808	0.151271	0.55791	258502
Six3os1	-1.15876	-0.0904174	0.288101	0.702114	100043902
Sdr9c7	-1.15857	-0.955619	0.16024	0.568706	70061
Ssmem1	-1.15843	-1.88124	0.252318	0.667859	75647
Gm5067	-1.15807	0.792373	0.0158515	0.168655	272714
Fbln7	-1.15791	-0.420477	0.126527	0.521492	70370
Des	-1.15784	0.273829	0.0825331	0.430073	13346
1700006J14Rik	-1.15713	2.09247	0.0112791	0.134852	321010
Gpr25	-1.15646	2.30964	0.00417961	0.0684908	383563
Clec2l	-1.15629	-0.931938	0.0686664	0.39535	665180
Gabrb1	-1.15597	-1.12421	0.300366	0.711568	14400
Fscn1	-1.15593	5.42722	5.62052e-05	0.00274062	14086
Gm3476	-1.15549	-0.792863	0.361567	0.755324	100041702
Gm5890	-1.15499	-1.94618	0.303821	0.714536	545926
Gm6509	-1.15476	-0.788199	0.181072	0.595784	624507
Ppp1r42	-1.15456	-1.20768	0.193749	0.610165	69312
Dpp6	-1.15456	0.154271	0.155746	0.563053	13483
Ano3	-1.15432	-0.753006	0.149496	0.556065	228432
Zcchc24	-1.15423	2.07904	0.0191631	0.191268	71918
Lrit3	-1.15383	-1.1935	0.235834	0.654678	242235
Gm6818	-1.15353	-0.839252	0.253208	0.668091	627975
Htr2a	-1.15267	-1.34012	0.380512	0.769013	15558
Ccdc88a	-1.15261	4.83324	7.61403e-08	1.2477e-05	108686
Cd300ld3	-1.1524	-1.29467	0.261492	0.676934	382551
Pnoc	-1.1518	-1.39089	0.173268	0.584539	18155
Gm9961	-1.15173	-1.38381	0.160179	0.56869	791359
Slc6a17	-1.1509	0.299953	0.0386901	0.294062	229706
Dlx2	-1.15088	-1.58175	0.315789	0.724495	13392
Whrn	-1.15017	5.13198	1.27365e-07	2.00494e-05	73750
Spp2	-1.14959	-1.54856	0.141391	0.541417	75396
Plaat1	-1.14934	-1.62903	0.285628	0.70063	27281
Il2ra	-1.14894	-0.89027	0.226774	0.645068	16184
C1rb	-1.14876	-0.0532293	0.0915252	0.453138	667277
Acot3	-1.1484	-1.29341	0.182327	0.597296	171281
Rp1	-1.1478	-0.782481	0.144541	0.546552	19888
Cadm3	-1.14734	-1.21084	0.221097	0.640047	94332
A930004D18Rik	-1.14708	0.385752	0.0243147	0.222675	77940
Htr1a	-1.14633	-1.36881	0.310199	0.720393	15550
Gm7614	-1.14629	-0.931413	0.110672	0.49487	665386
Sdc3	-1.146	5.72274	4.5453e-05	0.00234396	20970
Phf24	-1.14531	-0.458551	0.0707152	0.401288	230085
Wdr66	-1.14492	0.0315842	0.0948768	0.458685	269701
Cyp3a25	-1.14472	-1.3447	0.158223	0.566012	56388
Kng1	-1.14458	-0.697503	0.252278	0.667842	16644
Slc35f1	-1.14376	-1.06195	0.193525	0.609937	215085
Gm5866	-1.14328	-1.57141	0.275017	0.689077	545750
Rcn3	-1.1431	0.729965	0.0244528	0.223094	52377
Vit	-1.14295	-1.17361	0.190861	0.60769	74199
Rhebl1	-1.14275	1.1082	0.00707	0.099258	69159
Samd11	-1.14259	-0.269211	0.0675421	0.392188	231004
Gm10814	-1.14234	-0.117546	0.0549565	0.35237	100502985
Gpc2	-1.14224	3.66711	9.24235e-05	0.00410607	71951
Hgd	-1.14186	-0.643327	0.105789	0.484881	15233
Cd34	-1.14163	0.688132	0.0718597	0.404567	12490
Enho	-1.14075	0.851252	0.0481104	0.327374	69638
5031410I06Rik	-1.1407	1.47431	0.0850982	0.437589	381622
Gm13078	-1.13981	-1.94446	0.285486	0.70063	277666
Mmp24	-1.13966	3.48042	0.00125349	0.0285745	17391
Gm7489	-1.13966	-1.46159	0.364049	0.757229	665097
Elavl2	-1.13952	-0.829623	0.185435	0.601282	15569
Clec4g	-1.13915	-1.73507	0.334366	0.73924	75863
Egfros	-1.13876	3.73239	0.0503476	0.334513	319954
Gm16495	-1.13876	-1.68959	0.296428	0.709147	791278
Irx4	-1.13869	-1.27593	0.32646	0.733006	50916
Vsnl1	-1.13839	-1.75288	0.246523	0.663458	26950
Rnf222	-1.13818	-1.98766	0.383134	0.770677	320040
Kcnq5	-1.13781	0.936586	0.0157288	0.167976	226922
Gm11236	-1.13669	-0.715539	0.275821	0.689444	100862015
Vmn2r39	-1.13649	-1.37699	0.248465	0.665309	545909
Zfp541	-1.13625	-0.067252	0.181657	0.596514	666528
Crispld2	-1.13614	0.951962	0.0224684	0.212087	78892
Gm16712	-1.13591	-1.95249	0.33384	0.73924	100504333
Ucp1	-1.13585	-0.843819	0.085637	0.438556	22227
Vegfa	-1.13564	9.45823	2.44686e-08	4.89177e-06	22339
Gm16513	-1.13521	0.317234	0.304594	0.714915	100041253
Dnase1l3	-1.13484	1.43158	0.0473897	0.325161	13421
Trim9	-1.13415	-0.194907	0.15312	0.559323	94090
Blk	-1.13372	-0.23722	0.123168	0.517552	12143
Fgfr1	-1.13278	6.63259	3.76707e-06	0.000320156	14182
Aox3	-1.13276	-0.133552	0.189479	0.605435	71724
Robo4	-1.1327	0.276507	0.0452787	0.317938	74144
Nxph3	-1.13144	-1.38962	0.22679	0.645068	104079
Dmrt2	-1.13133	-0.865073	0.14024	0.540052	226049
Mfsd4b2	-1.13089	-1.43194	0.161424	0.56968	72045
Adcy10	-1.13038	0.738801	0.0393646	0.296456	271639
Rps15a-ps2	-1.13006	-1.53367	0.297856	0.709598	434460
Gm16630	-1.12994	-0.962787	0.246851	0.6637	100503622
Sla2	-1.12972	-0.777538	0.0866358	0.440943	77799
Pcdhb14	-1.12961	0.445256	0.0243751	0.222922	93885
Glrp1	-1.12932	0.226981	0.0254507	0.228884	14659
Olfr1274	-1.12907	-1.53351	0.151099	0.55791	258330
Zfp583	-1.128	0.113642	0.104927	0.483116	213011
Mpped1	-1.12794	-1.21946	0.367999	0.759239	223726
3110006O06Rik	-1.12788	-1.0234	0.228915	0.646916	73093
Msn	-1.12778	9.62258	2.74754e-05	0.00157841	17698
Gm3383	-1.12759	-0.222989	0.0928404	0.454807	100041515
Rdh8	-1.12753	-1.09919	0.230638	0.6497	235033
Gm3149	-1.12612	-0.804899	0.331657	0.737787	100041119
Hoxa10	-1.12607	-1.55678	0.213481	0.63069	15395
Camk2a	-1.12579	0.231335	0.126537	0.521492	12322
Pitpnm3	-1.12532	6.31656	3.20503e-07	4.30033e-05	327958
Gm5069	-1.12495	-0.571644	0.125301	0.519753	277333
Olfr48	-1.12478	-1.90771	0.235661	0.654675	18347
Gm3239	-1.12478	-0.901917	0.130388	0.526566	100041262
Prdm12	-1.12473	-0.718865	0.261835	0.677017	381359
Slc28a2b	-1.12411	-0.286232	0.129897	0.525794	381417
Mug2	-1.12369	-0.25165	0.255865	0.670835	17837
Acan	-1.12346	4.69791	0.0904718	0.45105	11595
Gm7736	-1.1228	-0.386387	0.110743	0.495031	665662
Tnnt3	-1.12264	-0.559811	0.209453	0.626812	21957
Apba1	-1.12229	3.232	0.00189792	0.0384042	319924
Dpysl3	-1.12216	5.50971	0.00183102	0.0374292	22240
Skida1	-1.12206	0.128492	0.0327422	0.265658	72668
Flt3	-1.12193	-0.186191	0.204211	0.62206	14255
1700003M07Rik	-1.12148	-1.00163	0.331884	0.737882	72225
Tex38	-1.12126	-1.77529	0.261055	0.676826	75173
Tchhl1	-1.12113	-0.76802	0.121088	0.515223	71325
Gm10674	-1.12095	1.44903	0.112226	0.497419	547103
G630071F17Rik	-1.12087	-1.12378	0.13061	0.526566	328963
Adgrl4	-1.12018	0.425	0.03406	0.272687	170757
Tmem255b	-1.1195	-1.11694	0.139511	0.539012	272465
1700073E17Rik	-1.11934	-0.966759	0.328738	0.735466	381827
Fxyd2	-1.11915	-1.25222	0.227074	0.645273	11936
Wnt3	-1.11856	-1.0513	0.108599	0.490204	22415
Htr2c	-1.11844	-1.10662	0.200869	0.617622	15560
Npy1r	-1.11707	-0.307151	0.0478533	0.326402	18166
Jakmip3	-1.1167	-0.571862	0.33161	0.737787	74004
6330410L21Rik	-1.1164	-1.51576	0.350342	0.748645	319224
Gm20560	-1.11625	-1.19127	0.304651	0.714915	330354
Mbl2	-1.11624	-0.867839	0.254997	0.669688	17195
Hmgcll1	-1.11605	4.03567	3.63144e-06	0.00031472	208982
Fgf10	-1.1156	-1.80824	0.238351	0.656714	14165
Ccdc102a	-1.11476	3.56179	4.07211e-05	0.00214801	234582
Smok3b	-1.11441	-0.464468	0.200613	0.617098	622474
Enpp1	-1.11434	6.16944	1.48e-09	5.0244e-07	18605
Asb12	-1.114	-2.02957	0.298529	0.709816	70392
4930558J18Rik	-1.11355	-1.22568	0.15463	0.560583	75323
Prss56	-1.11345	-0.831397	0.275528	0.689444	69453
Cngb3	-1.11249	-1.17179	0.237835	0.656197	30952
Galnt1	-1.1115	7.46698	9.38063e-06	0.000667393	14423
Gm4557	-1.11126	-1.7482	0.326136	0.732868	100043625
Slc38a1	-1.11121	5.22276	4.07901e-08	7.41342e-06	105727
Chp2	-1.11116	-1.24861	0.29715	0.709266	70261
Sp110	-1.11106	2.37846	0.0932723	0.455646	109032
Grk1	-1.11105	-0.0458173	0.154731	0.560699	24013
Cxcl14	-1.11033	-0.185115	0.100681	0.47315	57266
Pla2g5	-1.11027	-1.27366	0.174071	0.585605	18784
Slc35f4	-1.1099	-1.504	0.240875	0.659985	75288
Glipr2	-1.10899	1.96095	0.000881095	0.0220461	384009
Vmn2r1	-1.10819	-1.01077	0.112404	0.497419	56544
Gm15847	-1.10782	-1.34361	0.117646	0.507377	667127
Mir2137	-1.10766	-1.11381	0.100146	0.472534	100316779
8030442B05Rik	-1.10709	-0.574335	0.0696357	0.397191	77543
Fn3k	-1.10691	-0.45136	0.14158	0.541822	63828
Pdgfrb	-1.10623	1.68315	0.0671356	0.390394	18596
Clec4f	-1.10604	-1.05881	0.260781	0.676399	51811
Prph2	-1.10584	-1.16003	0.104564	0.482223	19133
Dbn1	-1.10572	7.20056	6.14639e-05	0.00294673	56320
Nuak1	-1.1057	5.12017	6.95111e-05	0.00326825	77976
Mcpt9	-1.10552	-0.65335	0.146424	0.55035	17232
Slc36a3	-1.1051	-0.956424	0.208195	0.625312	215332
Ccn5	-1.10485	-0.67578	0.115607	0.503306	22403
Prss44	-1.10457	-1.67015	0.170606	0.581248	73336
Orm3	-1.10456	-1.79989	0.154797	0.560735	18407
Col8a2	-1.10422	0.613019	0.0611839	0.375441	329941
Gm2163	-1.10402	0.840788	0.19255	0.60973	100039331
Ces4a	-1.10396	-0.871736	0.295524	0.708799	234677
Gm6370	-1.10368	-2.20273	0.448473	0.808521	622924
Dlx6os1	-1.10328	-1.3105	0.358247	0.754458	320038
Six3	-1.10313	-1.11448	0.329403	0.73612	20473
Adamts8	-1.10311	0.129527	0.136219	0.535555	30806
Gm19385	-1.10287	3.07881	0.000271378	0.00908775	100502807
Adamts7	-1.10255	4.45252	3.2018e-05	0.00179804	108153
Scn2b	-1.10179	-0.790819	0.196661	0.613744	72821
Spef2	-1.1015	-0.76457	0.17683	0.589366	320277
1700017N19Rik	-1.1014	-1.11956	0.35127	0.749316	66605
Zdhhc19	-1.10076	-1.01506	0.254054	0.668508	245308
Gulo	-1.10027	3.19341	0.0358859	0.280905	268756
Gm5592	-1.10023	-1.20915	0.367662	0.758966	434172
Spx	-1.09966	-0.847973	0.136262	0.535608	319552
Zfp831	-1.09965	-0.302688	0.1766	0.589119	100043757
Fga	-1.09872	-0.38249	0.0578788	0.363415	14161
Inhbe	-1.09811	-1.12607	0.240977	0.660021	16326
Gm5123	-1.09804	-0.910412	0.170085	0.580858	331391
Lix1l	-1.09791	2.72258	0.00970386	0.122476	280411
Hhla1	-1.09773	-1.49045	0.202226	0.619887	654498
E230016K23Rik	-1.09747	-0.989879	0.281441	0.696444	100504464
Gm14925	-1.09717	-2.09008	0.359253	0.754483	100503808
Ubash3a	-1.09699	-0.587867	0.110783	0.495031	328795
Duxf3	-1.09652	2.23907	0.165265	0.574635	74399
4933438K21Rik	-1.09598	-0.165132	0.20873	0.625627	71270
Fam189a2	-1.09578	3.05015	0.00280397	0.0510162	381217
Ubl4b	-1.09568	-1.86585	0.3526	0.750215	67591
Tekt1	-1.09525	-1.29449	0.228957	0.646916	21689
Gm9159	-1.09475	-1.31265	0.0995192	0.471154	668415
Asgr2	-1.09445	-1.46367	0.159492	0.567675	11890
2410004I01Rik	-1.09434	-1.95006	0.436474	0.804175	69739
Proz	-1.0942	-0.521551	0.0649444	0.384816	66901
Kcnc1	-1.094	-0.117366	0.05614	0.357664	16502
Mylk2	-1.09386	-0.560208	0.232665	0.652495	228785
Gm5861	-1.0935	0.0159828	0.132075	0.528752	545728
Hecw2	-1.09213	0.791316	0.0582863	0.364942	329152
C5ar2	-1.0915	-1.18849	0.244099	0.662211	319430
Clec12b	-1.09148	-1.11883	0.213515	0.63069	71183
Mpz	-1.09144	-0.829861	0.15692	0.56468	17528
Tspo2	-1.09128	-1.19169	0.284869	0.700333	70026
Il23a	-1.09114	4.10466	0.000904835	0.0224462	83430
Serpinb6c	-1.0908	-0.918034	0.154256	0.560196	97848
Cdh22	-1.09074	-0.768272	0.229473	0.647513	104010
Fcgr3	-1.09019	0.332107	0.0860436	0.439608	14131
Olfr91	-1.09019	-1.18983	0.15459	0.560583	258470
Zfp534	-1.09004	-1.11363	0.15859	0.56662	100503584
Albfm1	-1.08991	-1.51041	0.157733	0.565767	622307
Arhgap25	-1.08918	-0.102723	0.163293	0.572228	232201
Ankar	-1.08898	-1.44128	0.27665	0.690192	319695
Tpm1	-1.08888	9.61543	1.04756e-08	2.43521e-06	22003
Tmprss11g	-1.08773	-1.49432	0.253548	0.668218	320454
Ly86	-1.08771	-0.942215	0.314871	0.723954	17084
Frg2f3	-1.08761	-0.679198	0.245708	0.662914	668742
H2-M10.2	-1.08753	-0.570944	0.109197	0.49168	333715
Pdlim3	-1.08744	-1.50192	0.205444	0.623621	53318
Prss47	-1.08734	-1.61886	0.235702	0.654675	218304
Sall3	-1.08724	-0.327741	0.100552	0.473031	20689
Cyp2b19	-1.0872	-0.855311	0.304396	0.714915	13090
F630111L10Rik	-1.08684	-0.0272902	0.0992317	0.470997	320463
4930563E18Rik	-1.08671	-1.606	0.332179	0.738126	75370
Gzmd	-1.08665	-1.14533	0.34013	0.742193	14941
Fbxw23	-1.08648	-1.08828	0.285817	0.70063	635668
Grm5	-1.08633	-0.116872	0.216532	0.634469	108071
Gm20755	-1.08459	-1.86847	0.272395	0.686117	626410
Irf4	-1.08457	-0.166076	0.12209	0.516359	16364
Gm21093	-1.08454	-0.0778682	0.151919	0.558199	100861635
Sptlc3	-1.08438	-1.23029	0.255237	0.670043	228677
Amelx	-1.08408	-1.26223	0.208034	0.625312	11704
Agbl4	-1.08406	-1.53024	0.225343	0.643442	78933
Cped1	-1.08381	0.204555	0.0869111	0.441557	214642
Kdr	-1.08337	1.68903	0.103779	0.480379	16542
Chst1	-1.08314	-1.2391	0.16083	0.569325	76969
Rfx4	-1.08228	-1.19212	0.323657	0.731218	71137
Acsm2	-1.08197	-0.312439	0.228459	0.646356	233799
Gm5755	-1.08194	-0.810613	0.176367	0.588853	436196
Prss27	-1.08155	2.43857	0.000483508	0.0141527	213171
Oacyl	-1.08139	0.244793	0.0869558	0.441591	319888
Myrfl	-1.08075	-0.434205	0.10794	0.489218	237558
Nyap2	-1.08045	-1.08791	0.267329	0.681299	241134
Cd1d1	-1.08015	1.28685	0.00305746	0.054527	12479
Col5a2	-1.07976	3.98622	0.073378	0.408238	12832
Nt5c1b	-1.07964	-1.45583	0.314149	0.723555	70881
Plin1	-1.07956	-1.07195	0.140123	0.540052	103968
Tenm3	-1.07933	0.877346	0.0460192	0.320129	23965
Tmcc2	-1.07916	0.630055	0.0331457	0.267845	68875
Col10a1	-1.07882	1.5416	0.0595569	0.369656	12813
Siglece	-1.07836	-0.901395	0.257227	0.67178	83382
Slc8a3	-1.07815	-0.259188	0.10068	0.47315	110893
Ajap1	-1.07814	-1.02388	0.227697	0.645689	230959
AW121686	-1.07688	-1.39661	0.185625	0.601282	106026
4930455F16Rik	-1.07673	-1.72028	0.237123	0.655519	76397
Sostdc1	-1.07629	-1.14024	0.280562	0.695267	66042
Nkx2-4	-1.07612	-1.50753	0.192965	0.60973	228731
Stmnd1	-1.07611	-1.30682	0.241706	0.660727	380842
Sox10	-1.07598	-0.161577	0.0443694	0.314164	20665
Gm3883	-1.07533	0.18057	0.218062	0.635242	100042519
Krt39	-1.07489	-0.570996	0.202879	0.620651	237934
5330417H12Rik	-1.0745	-1.29673	0.388849	0.774908	76679
Gm5128	-1.07379	-1.62987	0.315121	0.724136	331529
Gzmn	-1.07299	-1.29542	0.436416	0.804175	245839
Tsnaxip1	-1.0728	-0.200029	0.0700252	0.398231	72236
Gm10419	-1.07279	-1.84065	0.264397	0.679238	100503802
Astl	-1.07271	-0.846725	0.164047	0.572859	215095
Anks1b	-1.07198	0.802563	0.0771182	0.418839	77531
Lep	-1.07187	-0.820828	0.293524	0.707919	16846
Rtl3	-1.07172	-1.6561	0.268764	0.681986	213436
Lsp1	-1.0714	2.05844	0.0201143	0.197604	16985
Kcnj15	-1.07092	0.853749	0.010405	0.127896	16516
Csmd3	-1.0706	0.235107	0.204143	0.62206	239420
8430431K14Rik	-1.07037	-1.60169	0.198527	0.615635	78103
Ptprv	-1.07001	-0.0027472	0.211402	0.629253	13924
Pkd1l1	-1.06979	1.37209	0.0535791	0.346428	171395
Map3k20	-1.06937	5.58048	2.16383e-07	3.08995e-05	65964
E330013P04Rik	-1.0689	-0.760206	0.134673	0.532936	107376
Gm10377	-1.06867	-1.10714	0.19296	0.60973	100042055
Sfta3-ps	-1.06851	-1.3675	0.265705	0.679397	104798
Gm10693	-1.0685	-1.04261	0.275547	0.689444	675749
Gm3147	-1.06755	0.836728	0.129151	0.524472	100041115
Gm805	-1.06755	-1.55128	0.230691	0.649758	328136
Prdm14	-1.06676	-1.04661	0.188138	0.604081	383491
Aldh1a3	-1.0666	7.69339	5.42768e-06	0.000430596	56847
Trim71	-1.06641	-0.888001	0.265457	0.679397	636931
Socs2	-1.06631	4.71611	1.97454e-07	2.88139e-05	216233
Insyn2b	-1.06629	-0.70629	0.295829	0.708799	574403
Best2	-1.06609	-1.0602	0.132221	0.528788	212989
Rgs10	-1.06572	0.354092	0.050449	0.33472	67865
Kcnj8	-1.06563	-0.986048	0.287991	0.702049	16523
Gm7347	-1.06512	-0.449086	0.215372	0.632914	664804
Pth1r	-1.06443	0.421729	0.0267091	0.235435	19228
Gm7386	-1.06418	-1.8926	0.245516	0.662776	664877
Gm5737	-1.06394	-1.0237	0.184167	0.599556	436008
Fbln2	-1.06386	9.28746	0.00489368	0.0769139	14115
Gm6460	-1.06358	-0.736331	0.247985	0.66494	623898
Cd19	-1.06357	-1.34702	0.227506	0.645422	12478
Nrp2	-1.06344	6.36459	2.76199e-07	3.80812e-05	18187
Tfpi	-1.06211	0.163574	0.0466259	0.322393	21788
Mcam	-1.06208	3.04777	9.9467e-05	0.00433234	84004
Fam167a	-1.06191	5.73686	1.80545e-06	0.000176071	219148
1110046J04Rik	-1.06177	-0.175091	0.0436964	0.311569	68808
Lhx5	-1.06165	-0.0855672	0.0963613	0.462645	16873
Csmd2	-1.06149	1.37056	0.171572	0.582135	329942
Unc93a	-1.06128	0.129031	0.283489	0.699088	381058
Kcnf1	-1.06088	-0.58119	0.247252	0.664211	382571
Pdgfa	-1.0606	5.76535	6.51849e-10	2.65954e-07	18590
Kcna3	-1.0603	-0.592117	0.0947047	0.458685	16491
Chrna3	-1.06023	-1.06174	0.263259	0.678056	110834
Foxd1	-1.05985	-1.50829	0.2604	0.675817	15229
5430428K19Rik	-1.0597	-2.04392	0.308115	0.718851	71422
Tspan6	-1.05907	2.54635	0.000254187	0.00864235	56496
Hao1	-1.05877	-2.03368	0.43451	0.803529	15112
Odf3l1	-1.05835	-1.18213	0.226403	0.64495	382075
Grid1	-1.05815	-0.271296	0.192427	0.60973	14803
Btbd35f15	-1.05757	-0.799268	0.225343	0.643442	100040698
Gpr171	-1.05754	-2.18576	0.371511	0.762216	229323
Pcdha6	-1.05753	-1.42242	0.251958	0.667645	12937
Ppm1j	-1.05742	4.37321	4.49383e-08	7.9505e-06	71887
Gm13842	-1.057	-2.31042	0.470684	0.818948	100502934
G630093K05Rik	-1.05652	-2.00229	0.284161	0.699796	619327
A230028O05Rik	-1.05636	-0.411901	0.0666903	0.389119	319487
Hyal4	-1.05634	-1.68344	0.255379	0.670105	77042
Gm14725	-1.0559	-1.98687	0.342664	0.743925	628053
Acvr1c	-1.0554	0.233997	0.0875539	0.442462	269275
Gm6300	-1.05511	-0.777077	0.201418	0.618227	622229
Igfbpl1	-1.05507	-0.44127	0.0927813	0.454628	75426
4930544D05Rik	-1.05461	-1.18793	0.18818	0.604081	668433
Foxb1	-1.05445	-1.49108	0.325293	0.732508	64290
Ccdc39	-1.05436	1.02334	0.0207925	0.202359	51938
Cnga3	-1.05387	-0.771679	0.258874	0.673949	12790
Notum	-1.05386	0.0993863	0.118077	0.508747	77583
Cd70	-1.05337	-1.90313	0.380168	0.769005	21948
AA619741	-1.05326	-1.82775	0.363496	0.756559	241051
Slc12a1	-1.05324	-0.265139	0.221785	0.640937	20495
Adam34	-1.05303	-2.30176	0.461865	0.814969	252866
Pira2	-1.05298	-0.887419	0.117259	0.506318	18725
Ppp1r18	-1.05284	6.39476	1.26172e-07	2.00193e-05	76448
4930432J09Rik	-1.05256	-1.6014	0.309138	0.719778	73877
Chrna10	-1.05233	-0.383705	0.100007	0.472186	504186
Gm19359	-1.05224	-0.900581	0.186684	0.602781	100502768
Nudt11	-1.05189	-0.223923	0.055628	0.355195	58242
Lair1	-1.05142	-0.863325	0.160524	0.568998	52855
Nkx2-2os	-1.051	-0.60568	0.251673	0.667575	100313531
Gabrd	-1.05086	-1.55441	0.212523	0.629353	14403
Grik1	-1.05079	-1.01589	0.221268	0.640359	14805
Gm10032	-1.05015	-1.95607	0.320485	0.729743	791407
Scimp	-1.05005	-1.68791	0.236038	0.654678	327957
Spata25	-1.04976	-1.93393	0.274698	0.688709	75642
Olfr1372-ps1	-1.04881	4.80246	7.68266e-06	0.000568858	257871
Gm21136	-1.04869	-0.426123	0.287787	0.701885	100861686
Sema4f	-1.04849	2.63563	0.000353501	0.0111063	20355
Popdc2	-1.04811	-1.14343	0.207599	0.62517	64082
Fxr1	-1.04801	6.2165	7.59799e-09	1.89947e-06	14359
Dact3	-1.04767	-0.371318	0.114371	0.50096	629378
Olfr692	-1.04729	-1.31834	0.275213	0.689307	258352
Dysf	-1.04675	1.77288	0.0206121	0.201406	26903
Upp2	-1.04603	-1.73275	0.244558	0.662211	76654
Map1b	-1.04584	8.63312	0.000206615	0.00737615	17755
Slc2a7	-1.04515	-1.31103	0.34113	0.74242	435818
Gm3878	-1.04476	-1.24711	0.167418	0.576967	100042513
Arxes1	-1.04469	-1.18109	0.209759	0.627019	76219
Gm14405	-1.0446	-0.0719535	0.085551	0.438556	626877
Cyp4f37	-1.04316	-0.397924	0.334614	0.739264	677156
Gja4	-1.04304	0.0590158	0.080597	0.426624	14612
Dnm3os	-1.04304	-0.57566	0.124743	0.519553	474332
Ppp1r3g	-1.04257	-1.59765	0.356913	0.753954	76487
Dusp22	-1.04228	2.4301	0.000103724	0.00445945	105352
Aox2	-1.04208	0.3159	0.0890284	0.446982	213043
Nav1	-1.04202	6.66789	3.55663e-08	6.64525e-06	215690
Rhox11	-1.0419	-1.98338	0.323088	0.731194	194738
Acsl6	-1.04175	3.10313	0.00293635	0.0528448	216739
Gm14151	-1.04152	-0.387084	0.300437	0.711652	433486
Rfpl4	-1.04147	-1.52466	0.139423	0.538929	192658
Gria4	-1.04135	-0.20935	0.218077	0.635242	14802
Lmod1	-1.04117	-0.0632438	0.0355536	0.279596	93689
Btnl6	-1.04102	-0.892883	0.261129	0.676931	624681
Gm16440	-1.04094	-1.84222	0.315351	0.724223	544998
Fndc4	-1.0408	1.66102	0.000943084	0.0232194	64339
Spi1	-1.04079	-1.09	0.322576	0.730517	20375
Naalad2	-1.04043	-0.113208	0.0956656	0.460411	72560
Cacna2d3	-1.04015	0.405882	0.225876	0.644458	12294
Cyp11b1	-1.03974	-0.888703	0.163715	0.572603	110115
Mei1	-1.03928	0.256041	0.290111	0.704129	74369
Trav6d-6	-1.0388	-0.587843	0.309587	0.720038	100042444
Trav6-6	-1.0388	-0.587843	0.309587	0.720038	100126465
Apbb2	-1.03854	6.79372	4.67816e-06	0.00038647	11787
Pcdhb17	-1.03833	1.77373	0.00176504	0.0366044	93888
Armcx4	-1.0377	1.53807	0.00452223	0.0727341	100503043
Olfr1414	-1.03757	-1.45765	0.413842	0.789718	259041
Kcnv2	-1.03747	-0.974922	0.181189	0.596072	240595
Acod1	-1.03744	-1.14359	0.16765	0.576978	16365
Mmp27	-1.03728	-1.60276	0.333449	0.739144	234911
Gm2921	-1.03725	-1.86734	0.262058	0.677128	100040711
Drp2	-1.0371	-0.150937	0.155845	0.56324	13497
Fam166b	-1.03688	-0.86635	0.125987	0.520412	329831
Chrnb1	-1.03632	5.34087	2.15732e-09	6.84591e-07	11443
A230107N01Rik	-1.03595	-0.957989	0.155716	0.563046	320919
Cdkn1c	-1.03557	3.47395	0.000175207	0.0065431	12577
Arl9	-1.03513	-1.48885	0.186439	0.602729	384185
4932416K20Rik	-1.03465	-0.572117	0.314711	0.72394	442809
Phf11a	-1.03441	-1.02639	0.242998	0.661328	219131
4932441J04Rik	-1.03436	-1.91605	0.25999	0.675292	319216
Fbxo40	-1.03395	-1.31279	0.245621	0.662776	207215
Mir1942	-1.03375	-1.47258	0.139574	0.539012	100316774
Art3	-1.03363	-1.17144	0.153544	0.559703	109979
AU016765	-1.03353	-1.32485	0.293494	0.707919	100043582
Hesx1	-1.03337	-1.42038	0.174315	0.585993	15209
Fyn	-1.03335	3.95464	2.70595e-06	0.000249297	14360
Gm6498	-1.03332	0.18356	0.0532096	0.344596	624367
Klhl30	-1.03327	0.70118	0.0923538	0.454623	70788
Gm19691	-1.03323	2.45428	0.000449359	0.0133884	100503437
Clec12a	-1.03295	-1.60699	0.244494	0.662211	232413
Kcns2	-1.03267	-1.11301	0.302284	0.713255	16539
Slc12a4	-1.03241	5.36841	2.96823e-06	0.000269731	20498
Gm5591	-1.0324	-0.317443	0.265682	0.679397	434171
Nwd1	-1.03212	0.109194	0.141347	0.541417	319555
Adamts2	-1.03206	2.82049	0.00921982	0.117703	216725
Pcdhb2	-1.03188	-0.92341	0.221611	0.640792	93873
Cacng1	-1.03137	-1.06776	0.2091	0.626198	12299
Spo11	-1.03123	-1.35403	0.274144	0.688243	26972
Aldh3b3	-1.03117	-0.790486	0.128858	0.523921	73458
4933429K18Rik	-1.03117	-1.46004	0.193462	0.609937	71232
Hand2	-1.03114	-1.05782	0.274597	0.688674	15111
Rnf125	-1.03108	3.01216	0.00021921	0.0076885	67664
Spdye4c	-1.03092	-1.11735	0.153031	0.559323	241634
Gm19424	-1.03092	-0.999379	0.238836	0.657415	100502871
Prtn3	-1.03069	-1.33452	0.177366	0.589987	19152
Rp1l1	-1.02999	-0.0158097	0.20556	0.623621	271209
Prrt1	-1.02994	-1.48817	0.34561	0.745405	260297
Ldc1	-1.0296	-0.916489	0.216208	0.634375	332942
Ralyl	-1.02933	-0.939888	0.115009	0.50202	76897
5430427M07Rik	-1.02928	-1.53142	0.179425	0.593346	71349
Eldr	-1.02837	-0.706352	0.172613	0.58373	72735
Gpc1	-1.02825	5.67491	0.00016138	0.00613368	14733
Mdga2	-1.02822	-0.608598	0.23497	0.654068	320772
Mroh8	-1.02785	0.0479899	0.130858	0.526566	629499
Myh1	-1.02771	-0.0515101	0.244414	0.662211	17879
Gm19689	-1.02763	-1.51354	0.354702	0.751827	100503434
Aldh8a1	-1.02732	-0.777354	0.165468	0.574847	237320
Gldc	-1.02708	3.14891	0.0201643	0.197804	104174
Cilp2	-1.02699	-0.182865	0.101495	0.474084	68709
Adgrl1	-1.0268	4.21689	0.0017799	0.036798	330814
Mmrn1	-1.02646	-0.721787	0.392322	0.777257	70945
Art4	-1.026	-1.94541	0.293029	0.707604	109978
Grip1	-1.02599	2.19277	0.00492429	0.0770999	74053
Ms4a6b	-1.02552	-1.58873	0.424766	0.79699	69774
Abcb5	-1.02535	-0.216084	0.338972	0.741534	77706
C8a	-1.02518	-1.25948	0.333265	0.739144	230558
Mc4r	-1.02471	-1.33259	0.225292	0.643442	17202
Siglec15	-1.02438	-0.588628	0.240576	0.659663	620235
Cd69	-1.02431	-1.60664	0.411149	0.788157	12515
Abcd2	-1.02422	-1.18202	0.270892	0.684559	26874
Gpr156	-1.02404	-0.224388	0.224329	0.643164	239845
Olfml2b	-1.02401	3.09799	0.000410294	0.0124094	320078
a	-1.02386	-1.08801	0.174454	0.586045	50518
Prss46	-1.02321	-1.51229	0.186116	0.602128	74306
Egfl6	-1.02303	3.21092	0.00778906	0.105599	54156
Gpr179	-1.02258	1.12481	0.133793	0.530188	217143
Tnnt2	-1.02195	5.25425	4.0531e-06	0.000341897	21956
Gm13238	-1.02178	1.24327	0.00529048	0.0812344	236069
Cenpt	-1.02175	3.60164	3.00466e-06	0.000271806	320394
Serpinb9f	-1.02156	-1.15393	0.372017	0.762728	20709
Il6	-1.02151	-0.279411	0.0870222	0.441757	16193
Sirpb1c	-1.0215	-1.32431	0.284009	0.699632	100038947
Gm10400	-1.0214	-1.26457	0.24648	0.663458	100093700
Adamts20	-1.02106	0.622866	0.215338	0.632908	223838
Glra1	-1.02096	-0.878211	0.132794	0.529148	14654
Saa1	-1.02078	-2.07242	0.312171	0.721578	20208
Sall4	-1.0203	-0.526651	0.40099	0.782669	99377
Ctsw	-1.01987	2.00106	0.0078369	0.10579	13041
Gm5795	-1.01977	-0.657799	0.322864	0.730832	544990
Camkv	-1.01961	0.588411	0.0622275	0.378246	235604
Sox5os3	-1.01945	-1.71311	0.313567	0.723214	66760
Lactbl1	-1.01921	-1.04334	0.17532	0.587497	242707
Tmem53	-1.01918	-0.0651962	0.0391497	0.296234	68777
Mup7	-1.01916	-1.04071	0.248134	0.66494	100041658
1520401A03Rik	-1.01893	0.0470727	0.0552536	0.353482	320309
Bpifb9a	-1.01882	-0.678541	0.258678	0.673722	71425
Gm17758	-1.01858	-1.58269	0.162511	0.570971	675713
Gm21663	-1.01852	-0.166488	0.184966	0.601271	100862349
Gm12830	-1.01819	-1.17807	0.410447	0.787742	433746
Spta1	-1.01804	0.656024	0.186816	0.602781	20739
Vegfc	-1.01753	3.3507	0.0057614	0.086473	22341
Cyp3a57	-1.01724	-1.54465	0.344388	0.744669	622127
C630031E19Rik	-1.01702	-0.933191	0.253555	0.668218	328075
Gm19510	-1.01673	-1.41155	0.301216	0.712484	100503021
Gm16063	-1.01666	-1.84736	0.359627	0.754483	330183
Dipk1a	-1.01643	2.30669	0.000458856	0.0135833	67266
Ifitm10	-1.01638	2.13194	0.00592126	0.0878826	320802
Bhlhe22	-1.0158	-1.12143	0.326783	0.733555	59058
Fxyd5	-1.01562	4.41073	0.000291264	0.00956153	18301
Cyp4a10	-1.01519	-0.793501	0.268577	0.681986	13117
Gm17434	-1.01471	-1.40285	0.243158	0.66148	100503803
Fbxw7as1	-1.01469	-1.12024	0.103913	0.480555	654362
Myh3	-1.01465	0.763307	0.116442	0.50508	17883
Ahcy	-1.01453	5.37535	0.000442793	0.013252	269378
Nkx6-1	-1.01446	1.54555	0.051211	0.337112	18096
Cdh5	-1.01412	1.97604	0.0713323	0.403365	12562
Gm10125	-1.01396	-0.971005	0.213831	0.630982	791318
Tdrd9	-1.01355	-0.303009	0.177413	0.589987	74691
Rgsl1	-1.013	-0.420167	0.294449	0.707919	240816
Prelid3a	-1.0124	0.188635	0.0628796	0.379801	225655
Slc47a1	-1.01236	-0.619126	0.217687	0.634838	67473
Scn1a	-1.0121	-0.544383	0.244389	0.662211	20265
Enam	-1.01206	-0.46252	0.258	0.672834	13801
Pak7	-1.01197	-0.962104	0.23769	0.656052	241656
4930488L21Rik	-1.01165	-1.0281	0.336854	0.740507	75809
Dmrt1	-1.0115	-1.65883	0.318825	0.728203	50796
Gm19551	-1.01141	4.72132	0.0426208	0.308611	100503094
Rad54b	-1.01135	1.90967	0.00187038	0.0380007	623474
Vrtn	-1.01131	-1.48021	0.409486	0.787385	432677
Foxl1	-1.01057	-1.44188	0.392783	0.777655	14241
Spag8	-1.01042	-0.858446	0.121208	0.515385	433700
Vcam1	-1.01036	6.12082	0.0448292	0.315795	22329
Klf12	-1.01028	4.1314	5.3884e-05	0.00264995	16597
Cacng4	-1.01025	-1.83316	0.338298	0.741097	54377
Zfp57	-1.0099	4.35509	6.50488e-08	1.0973e-05	22715
2700099C18Rik	-1.00942	0.870616	0.0122699	0.142368	77022
Fgf2	-1.00935	-0.90236	0.15079	0.55791	14173
Ctsk	-1.00914	0.515805	0.043998	0.312694	13038
Csmd1	-1.00896	0.949354	0.143969	0.54512	94109
Nol4	-1.00883	0.181245	0.085826	0.439057	319211
Gm11738	-1.00863	-1.71613	0.304762	0.715016	100503797
2900079G21Rik	-1.00858	-0.611697	0.369926	0.761242	620760
Slc9c1	-1.00797	-0.366354	0.266054	0.67965	208169
Gm5434	-1.00789	-1.56002	0.167589	0.576967	432649
Cngb1	-1.00776	0.698824	0.155634	0.562892	333329
1700093K21Rik	-1.00687	-1.12306	0.347223	0.746266	67358
Ntrk1	-1.00683	-0.346648	0.181751	0.596646	18211
Gm11538	-1.00681	-1.69467	0.370607	0.761693	432593
Slitrk1	-1.00667	-1.10853	0.214089	0.631427	76965
Cpeb1	-1.00664	2.37765	0.000954129	0.0233762	12877
Gpr87	-1.0065	-1.7827	0.326147	0.732868	84111
Rspo4	-1.00473	-0.576238	0.187674	0.603891	228770
Olfr286	-1.00471	-1.90438	0.426499	0.79792	629524
Gpr151	-1.0047	-0.635797	0.186792	0.602781	240239
Gcg	-1.00459	5.22537	0.180751	0.595318	14526
Gins3	-1.00456	1.07611	0.00738771	0.10217	78833
Rbfox1	-1.00445	0.198965	0.163686	0.572601	268859
Flnc	-1.00428	6.69776	0.0456438	0.31923	68794
Ttc34	-1.00424	-0.898699	0.400716	0.782565	242800
Arhgap22	-1.00405	3.02438	9.06743e-05	0.00404924	239027
Cacna1e	-1.00384	1.1203	0.196638	0.613744	12290
Cntn1	-1.00383	0.0626731	0.263724	0.678643	12805
Macrod2os2	-1.00349	-1.50058	0.355615	0.752721	100038667
Smok2b	-1.00319	-0.702902	0.398963	0.781505	236574
Zfp488	-1.00279	-1.02317	0.235898	0.654678	382867
Batf3	-1.00254	-0.885044	0.17752	0.590022	381319
Arhgef15	-1.00245	0.246935	0.189808	0.60569	442801
P2ry13	-1.00232	-0.693833	0.195311	0.61264	74191
Slc26a5	-1.00231	-0.913025	0.244392	0.662211	80979
Csf2rb2	-1.00191	0.411684	0.100323	0.472585	12984
4932414N04Rik	-1.00174	-1.10495	0.343757	0.744183	75721
Aqp4	-1.0015	-0.522565	0.167207	0.576917	11829
Fsip2	-1.0013	0.153585	0.258133	0.672985	241516
Ankrd1	-1.00114	5.84347	0.00372035	0.0629249	107765
Sh3rf3	-1.00104	-0.167439	0.191367	0.608741	237353
Mageb3	-1.00063	-0.906471	0.165812	0.574847	17147
Slc24a3	-1.00059	0.321374	0.153605	0.559703	94249
Lrrc17	-1.00045	-1.79434	0.444711	0.807744	74511
Dcn	-1.00042	1.90236	0.176733	0.58928	13179
Bbs12	-1.00028	1.17129	0.00662623	0.0948258	241950
Fam126a	-0.999938	4.87622	6.48868e-06	0.000498929	84652
1700024B05Rik	-0.999705	-1.6686	0.27594	0.689444	100503856
Vmn1r132	-0.999638	-0.80394	0.262763	0.677827	100043604
Zmat4	-0.999547	-0.940924	0.366581	0.75852	320158
Sgcg	-0.999533	-1.00395	0.211184	0.62874	24053
Teddm1b	-0.999463	-0.792755	0.30404	0.714536	433365
Kif3c	-0.999457	5.03132	6.39342e-06	0.000495415	16570
[truncated: 17,570 more rows]
