# Supplementary material for: Mutant SF3B1 promotes malignancy in PDAC
Source: eLife. 2023 Oct 12;12:e80683. doi: 10.7554/eLife.80683 (PMC10629822; doi:10.7554/eLife.80683)
Supplement: Supplementary file 2. [file elife-80683-supp2.xlsx]

## Sheet: Exon skip
Ensembl	genename	chr	evpos 0	evpos 1	evpos 2	evpos 3	evpos 4	evpos 5	delta psi	std KPC-K700E	std KPC	pval	fdr	distance
ENSMUSG00000025903.14	Lypla1	chr1	4828583	4828649	4830267	4830315	4832310	4832381	0.00692633	0.00768479	0.00391187	0.245413	0.896772	0
ENSMUSG00000025903.14	Lypla1	chr1	4837000	4837074	4839386	4839488	4840955	4841132	0.0980452	0.134772	0.00847466	0.299122	0.896772	0
ENSMUSG00000033793.12	Atp6v1h	chr1	5083163	5083278	5084416	5084563	5089008	5089111	0.0160119	0.0434846	0.0112149	0.574631	0.946848	0
ENSMUSG00000033793.12	Atp6v1h	chr1	5098028	5098133	5101069	5101123	5117389	5117487	0.0090329	0.0116134	0.00637033	0.315853	0.896772	0
ENSMUSG00000025907.14	Rb1cc1	chr1	6228001	6228049	6229958	6230073	6233960	6234010	0.0705825	0.0516586	0.0348228	0.127119	0.896772	0
ENSMUSG00000025907.14	Rb1cc1	chr1	6263023	6263264	6264541	6264590	6265573	6265621	0.00257403	0.0210453	0.0199631	0.896857	0.999593	0
ENSMUSG00000033740.17	St18	chr1	6737579	6737657	6752295	6752368	6752993	6753036	1.11022e-16	0.0505076	1.11022e-16	0.983327	0.999593	0
ENSMUSG00000033740.17	St18	chr1	6752993	6753036	6753555	6753602	6768897	6768952	0.0175124	0.0870376	0.0515193	0.810036	0.999593	0
ENSMUSG00000033740.17	St18	chr1	6768897	6768952	6770943	6770974	6795385	6795425	0.00980449	0.132049	0.0648912	0.886089	0.999593	0
ENSMUSG00000033740.17	St18	chr1	6819933	6820145	6827775	6828021	6833562	6833598	0	0.0333087	0	0.98926	0.999593	0
ENSMUSG00000051285.17	Pcmtd1	chr1	7089165	7089216	7120193	7120599	7147636	7147739	0.0609221	0.0322538	0.0892534	0.460965	0.930278	0
ENSMUSG00000051285.17	Pcmtd1	chr1	7089165	7089216	7120193	7120615	7147636	7147739	0.186229	0.0968988	0.0520899	0.0423988	0.896772	0
ENSMUSG00000051285.17	Pcmtd1	chr1	7147636	7147739	7155079	7155271	7160891	7161063	0.0061987	0.0161298	0.013279	0.660976	0.964521	0
ENSMUSG00000025915.14	Sgk3	chr1	9798207	9798246	9827012	9827119	9865130	9865348	0.0375386	0.224494	0.172661	0.868468	0.999593	0
ENSMUSG00000056763.16	Cspp1	chr1	10045075	10045184	10047423	10047526	10058719	10058823	0.00683279	0.0163617	0.006958	0.5521	0.943411	0
ENSMUSG00000056763.16	Cspp1	chr1	10058719	10058823	10059823	10059847	10064332	10064413	0.0619813	0.0365707	0.0960769	0.462977	0.930278	0
ENSMUSG00000056763.16	Cspp1	chr1	10066425	10066820	10074859	10074946	10077171	10077242	0.00698074	0.0448104	0.0327599	0.844231	0.999593	0
ENSMUSG00000056763.16	Cspp1	chr1	10066425	10066820	10077171	10077242	10082252	10082346	0.191453	0.234521	0.147524	0.275515	0.896772	0
ENSMUSG00000056763.16	Cspp1	chr1	10083500	10083558	10085746	10085952	10088050	10088184	0.0589127	0.0544706	0.0594777	0.330042	0.900193	0
ENSMUSG00000056763.16	Cspp1	chr1	10095865	10096013	10104211	10104364	10108368	10108481	0.121109	0.0366146	0.0869506	0.165372	0.896772	0
ENSMUSG00000056763.16	Cspp1	chr1	10095865	10096013	10108368	10108481	10112392	10112542	0.0260014	0.04221	0.0565685	0.618696	0.953696	0
ENSMUSG00000056763.16	Cspp1	chr1	10113602	10113707	10116017	10116084	10116613	10116731	0.0377687	0.0637295	0.0234594	0.39374	0.920539	0
ENSMUSG00000056763.16	Cspp1	chr1	10113602	10113707	10116613	10116731	10126339	10126479	0.21875	0.16238	0.176777	0.254561	0.896772	0
ENSMUSG00000016918.15	Sulf1	chr1	12848330	12848454	12850759	12850793	12858811	12861192	0.0411765	0.0727607	0.0166378	0.405184	0.922474	0
ENSMUSG00000025925.14	Terf1	chr1	15813040	15813162	15815885	15815972	15818933	15819083	0.0793651	0.0830328	0.0159617	0.198661	0.896772	0
ENSMUSG00000025925.14	Terf1	chr1	15831506	15831566	15833400	15833489	15838181	15838288	0.011291	0.117282	0.033237	0.843743	0.999593	0
ENSMUSG00000025921.7	Rdh10	chr1	16106281	16106306	16107794	16108030	16128164	16128263	0.00321016	0.00160476	0.000979133	0.0394174	0.896772	0
ENSMUSG00000025921.7	Rdh10	chr1	16106281	16106306	16107838	16108030	16128164	16128263	0.110939	0.136601	0.0455638	0.274478	0.896772	0
ENSMUSG00000025921.7	Rdh10	chr1	16107794	16108030	16117673	16117823	16128164	16128263	0.000947313	0.00160723	0.0004309	0.392408	0.919447	0
ENSMUSG00000025921.7	Rdh10	chr1	16107794	16108030	16117673	16128263	16129195	16129341	0.0142276	0.0105613	0.0459907	0.719116	0.980814	0
ENSMUSG00000025921.7	Rdh10	chr1	16107838	16108030	16128164	16128263	16129195	16129341	0.0178256	0.0172104	0.0115073	0.225351	0.896772	0
ENSMUSG00000025921.7	Rdh10	chr1	16107838	16108030	16128164	16128310	16129195	16129341	0.0232008	0.0172221	0.0749962	0.726671	0.982767	0
ENSMUSG00000025921.7	Rdh10	chr1	16107838	16108030	16129195	16129341	16131074	16131206	0.0307018	0.0227901	0.0992431	0.692384	0.972152	0
ENSMUSG00000025921.7	Rdh10	chr1	16129195	16129341	16131074	16131206	16131293	16132547	0.00141148	0.00231182	0.00126467	0.420955	0.927519	0
ENSMUSG00000025921.7	Rdh10	chr1	16129195	16129341	16131108	16131206	16131293	16132547	0.0324074	0.0240563	0.0261891	0.231173	0.896772	0
ENSMUSG00000025940.6	Tmem70	chr1	16665235	16665505	16665707	16665867	16667667	16667773	0.0134847	0.00515491	0.0232792	0.501839	0.930962	0
ENSMUSG00000025934.15	Gsta3	chr1	21240628	21240659	21244937	21245020	21249750	21249858	0.0267369	0.0360354	0.0392703	0.480009	0.930278	0
ENSMUSG00000025934.15	Gsta3	chr1	21240628	21240659	21244937	21245032	21249750	21249858	0.0284105	0.0393576	0.0171206	0.331905	0.900193	0
ENSMUSG00000025934.15	Gsta3	chr1	21240628	21240659	21249750	21249858	21257330	21257382	0.0224099	0.0103277	0.0187114	0.227852	0.896772	0
ENSMUSG00000025934.15	Gsta3	chr1	21249750	21249858	21254683	21254823	21257330	21257382	0.00651607	0.019799	0.0131012	0.6722	0.96656	0
ENSMUSG00000025934.15	Gsta3	chr1	21260047	21260189	21262792	21262920	21264842	21264846	0.0979831	0.197688	0.0791823	0.446973	0.930278	0
ENSMUSG00000025934.15	Gsta3	chr1	21260047	21260189	21262792	21262924	21264842	21264846	0.00822744	0.00403653	0.0198785	0.623591	0.954493	0
ENSMUSG00000025934.15	Gsta3	chr1	21260047	21260189	21262792	21263229	21264842	21264846	0.0734848	0.0836649	0.0593847	0.302303	0.896772	0
ENSMUSG00000025934.15	Gsta3	chr1	21260047	21260189	21262792	21264752	21264842	21264846	0	0.0697488	0	0.966465	0.999593	0
ENSMUSG00000073725.8	Lmbrd1	chr1	24692940	24693001	24704820	24706044	24711511	24711600	2.41519e-05	0.0130174	0.0179014	0.996861	0.999593	0
ENSMUSG00000026131.20	Dst	chr1	34121249	34122392	34135089	34135256	34152201	34152314	0.00283532	0.0220176	0.0139675	0.864391	0.999593	0
ENSMUSG00000026131.20	Dst	chr1	34135089	34135256	34152201	34152314	34152412	34152519	0.0493311	0.0628983	0	0.270041	0.896772	0
ENSMUSG00000026131.20	Dst	chr1	34172182	34172345	34173001	34173085	34174114	34174222	0.00498328	0.0160694	0.00796543	0.663469	0.965216	0
ENSMUSG00000026131.20	Dst	chr1	34174696	34174795	34177795	34180498	34184015	34184144	0.00608246	0.0142479	0.00701895	0.562125	0.944677	0
ENSMUSG00000026131.20	Dst	chr1	34174696	34174795	34177795	34180498	34184018	34184144	0.249132	0.252067	0.112861	0.178453	0.896772	0
ENSMUSG00000026131.20	Dst	chr1	34177795	34180498	34181134	34181804	34184015	34184144	0.273624	0.183387	0.221122	0.260559	0.896772	0
ENSMUSG00000026131.20	Dst	chr1	34177795	34180498	34181134	34181804	34184018	34184144	0.233333	0.173205	0.188562	0.218666	0.896772	0
ENSMUSG00000026131.20	Dst	chr1	34177795	34180498	34181134	34183528	34184015	34184144	0	0	0.0889772	0.965114	0.999593	0
ENSMUSG00000026131.20	Dst	chr1	34184018	34184144	34185961	34186050	34186818	34186951	0.000574534	0.0160803	0.00436526	0.96101	0.999593	0
ENSMUSG00000026131.20	Dst	chr1	34195827	34196061	34196873	34196966	34197200	34197353	0.0129477	0.0141971	0.017501	0.435685	0.930278	0
ENSMUSG00000026131.20	Dst	chr1	34218334	34218576	34219395	34219525	34223803	34224003	0.0144916	0.0201298	0.00455463	0.305379	0.896772	0
ENSMUSG00000026131.20	Dst	chr1	34249478	34249638	34249803	34250130	34250609	34250669	0.00411568	0.0113206	0.00188848	0.576614	0.946848	0
ENSMUSG00000026131.20	Dst	chr1	34257835	34257940	34259091	34259197	34260163	34260367	0.00132755	0.00911606	0.00363732	0.834728	0.999593	0
ENSMUSG00000026131.20	Dst	chr1	34295461	34295536	34296741	34296759	34299720	34299838	0.0212874	0.0407959	0.0017995	0.423155	0.928841	0
ENSMUSG00000026131.20	Dst	chr1	34295461	34295536	34299720	34299838	34302829	34303032	0.00186966	0.135984	0.00151091	0.934781	0.999593	0
ENSMUSG00000026131.20	Dst	chr1	34299720	34299838	34301860	34301932	34302829	34303032	0.0184057	0.00857451	0.0167858	0.257789	0.896772	0
ENSMUSG00000026131.20	Dst	chr1	34302829	34303032	34303420	34303531	34306527	34306651	0.331075	0.127252	0.0577413	0.0190164	0.896772	0
ENSMUSG00000026127.13	Imp4	chr1	34443562	34443695	34443768	34443923	34443996	34444091	0.00121301	0.0161874	0.00778033	0.919439	0.999593	0
ENSMUSG00000026126.15	Ptpn18	chr1	34459791	34459916	34462701	34462810	34463465	34463504	0.0629735	0.0927003	0.0508903	0.364277	0.90987	0
ENSMUSG00000026126.15	Ptpn18	chr1	34462701	34462810	34463106	34463183	34463268	34463364	0.0182912	0.0256164	0.0192214	0.406766	0.922474	0
ENSMUSG00000026126.15	Ptpn18	chr1	34462701	34462810	34463106	34463188	34463268	34463364	0.206597	0.153359	0.166956	0.220006	0.896772	0
ENSMUSG00000026126.15	Ptpn18	chr1	34462701	34462810	34463106	34463364	34463465	34463504	0.000286933	0.0257924	0.0266271	0.991409	0.999593	0
ENSMUSG00000026126.15	Ptpn18	chr1	34462701	34462810	34463268	34463364	34463465	34463504	0.115956	0.194295	0.126378	0.436024	0.930278	0
ENSMUSG00000026126.15	Ptpn18	chr1	34463465	34463504	34468292	34468361	34469839	34469902	0.0974465	0.0232994	0.013064	0.00222412	0.896772	0
ENSMUSG00000026123.11	Plekhb2	chr1	34849991	34850063	34861872	34861917	34863005	34863158	0.00564467	0.00663331	0.00730362	0.429858	0.930278	0
ENSMUSG00000026123.11	Plekhb2	chr1	34849991	34850130	34861872	34861917	34863005	34863158	0.388889	0	0.437445	0.355235	0.905807	0
ENSMUSG00000037447.16	Arid5a	chr1	36307778	36307836	36314255	36314301	36316208	36316327	0.0239425	0.00335669	0.0191913	0.215302	0.896772	0
ENSMUSG00000037447.16	Arid5a	chr1	36307778	36307836	36314255	36316327	36318083	36318132	0.178039	0.100852	0.14193	0.187525	0.896772	0
ENSMUSG00000037447.16	Arid5a	chr1	36307778	36307836	36316208	36316327	36317609	36317662	0.00560224	0.0509427	0.0336718	0.881908	0.999593	0
ENSMUSG00000037447.16	Arid5a	chr1	36307778	36307836	36316208	36316327	36318083	36318132	0.0683917	0.26244	0.0444091	0.635765	0.959244	0
ENSMUSG00000037447.16	Arid5a	chr1	36307778	36307836	36316211	36316327	36317609	36317662	0.00560224	0.0509427	0.0336718	0.881908	0.999593	0
ENSMUSG00000037447.16	Arid5a	chr1	36307778	36307836	36316211	36316327	36318083	36318132	0.110443	0.231455	0.0579353	0.459759	0.930278	0
ENSMUSG00000037447.16	Arid5a	chr1	36307778	36307836	36317609	36317662	36318083	36318132	0.0403846	0.0099926	0.0498519	0.368408	0.910985	0
ENSMUSG00000037447.16	Arid5a	chr1	36316211	36316327	36317203	36317324	36317609	36317662	0.00232446	0.0291443	0.0220087	0.920082	0.999593	0
ENSMUSG00000037447.16	Arid5a	chr1	36316211	36316327	36317203	36317324	36318083	36318132	0.076318	0.091988	0.00983566	0.236962	0.896772	0
ENSMUSG00000037447.16	Arid5a	chr1	36316211	36316327	36317203	36317662	36318083	36318132	0.12427	0.175284	0.0719539	0.306577	0.896772	0
ENSMUSG00000037447.16	Arid5a	chr1	36316211	36316327	36317609	36317662	36318083	36318132	0.0887814	0.145398	0.0913716	0.40198	0.922474	0
ENSMUSG00000037447.16	Arid5a	chr1	36317203	36317324	36317609	36317662	36318083	36318132	0.0603758	0.0382218	0.010499	0.0700111	0.896772	0
ENSMUSG00000037447.16	Arid5a	chr1	36318083	36318181	36318487	36318653	36318991	36319203	0.00259354	0.0317066	0.0285844	0.926905	0.999593	0
ENSMUSG00000037447.16	Arid5a	chr1	36318083	36318181	36318518	36318653	36318991	36319203	0.0487773	0.274609	0.039418	0.672024	0.966548	0
ENSMUSG00000001138.13	Cnnm3	chr1	36521700	36521839	36524033	36524132	36525165	36528237	0.0311318	0.0169809	0.0578918	0.534536	0.940089	0
ENSMUSG00000061518.11	Cox5b	chr1	36692210	36692284	36692450	36692550	36693196	36693386	0.00101729	0.0044129	0.00190732	0.739732	0.98635	0
ENSMUSG00000026113.17	Inpp4a	chr1	37372315	37372419	37374271	37374289	37377577	37377761	0.0636644	0.0691413	0.0699793	0.373757	0.910985	0
ENSMUSG00000026113.17	Inpp4a	chr1	37372315	37372419	37374274	37374289	37377577	37377761	0.0292008	0.0760324	0.0578853	0.63484	0.958781	0
ENSMUSG00000026113.17	Inpp4a	chr1	37379921	37380060	37383338	37383371	37387697	37387870	0.0483721	0.072486	0.153688	0.761525	0.994888	0
ENSMUSG00000026113.17	Inpp4a	chr1	37379921	37380177	37383338	37383371	37387697	37387870	0.112461	0.121841	0.0873158	0.308327	0.896772	0
ENSMUSG00000026087.11	Mrpl30	chr1	37890532	37890584	37891816	37892172	37892942	37893023	0.00408786	0.00415904	0	0.187188	0.896772	0
ENSMUSG00000026087.11	Mrpl30	chr1	37890532	37890584	37892942	37893023	37893938	37893984	0.0109795	0.078083	0.0309707	0.816294	0.999593	0
ENSMUSG00000026087.11	Mrpl30	chr1	37893938	37894015	37895329	37895410	37897687	37897834	0.00943435	0.00982757	0.0122049	0.417482	0.926516	0
ENSMUSG00000026083.12	Eif5b	chr1	38036063	38036273	38037202	38037310	38037546	38037657	0.00790094	0.0104367	0.00326232	0.290403	0.896772	0
ENSMUSG00000026077.15	Npas2	chr1	39193944	39194009	39250949	39251090	39263318	39263375	0.00519747	0.0288195	0.0237683	0.837161	0.999593	0
ENSMUSG00000026077.15	Npas2	chr1	39263321	39263375	39287467	39287616	39292686	39292778	0.0205657	0.0522944	0.0438516	0.653862	0.963468	0
ENSMUSG00000026077.15	Npas2	chr1	39347490	39347681	39348431	39348524	39359648	39359823	0.0683019	0.0702769	0	0.191539	0.896772	0
ENSMUSG00000003135.15	Cnot11	chr1	39535801	39536337	39537415	39537580	39539872	39540075	0.0927953	0.105217	0.0753443	0.315615	0.896772	0
ENSMUSG00000003135.15	Cnot11	chr1	39537415	39537580	39538208	39538423	39539872	39540075	0.214613	0.144505	0.0869163	0.0833068	0.896772	0
ENSMUSG00000003135.15	Cnot11	chr1	39537415	39537580	39538270	39538423	39539872	39540075	0.00871048	0.0498206	0.0513998	0.859358	0.999593	0
ENSMUSG00000026074.15	Map4k4	chr1	39901508	39901574	39962177	39962234	39973926	39974052	0.00233282	0.000755694	0.00391613	0.489118	0.930962	0
ENSMUSG00000026074.15	Map4k4	chr1	39901508	39901574	39962177	39962239	39973926	39974052	0	0	0.31427	0.909486	0.999593	0
ENSMUSG00000026074.15	Map4k4	chr1	39973926	39974052	39976706	39976817	39980559	39980640	0.000121257	0.00719974	0.00570708	0.983525	0.999593	0
ENSMUSG00000026074.15	Map4k4	chr1	39983138	39983269	39983882	39983936	39985181	39985260	0.0536229	0.0398047	0.0269401	0.134306	0.896772	0
ENSMUSG00000026074.15	Map4k4	chr1	39983138	39983269	39983882	39983937	39985181	39985260	0.00480807	0.0061039	0.00101977	0.266812	0.896772	0
ENSMUSG00000026074.15	Map4k4	chr1	39983138	39983269	39985181	39985260	39986624	39986800	0.145833	0.108253	0.117851	0.245825	0.896772	0
ENSMUSG00000026074.15	Map4k4	chr1	39983882	39983937	39985181	39985260	39986624	39986800	0.00174789	0.00307922	0.000626868	0.403436	0.922474	0
ENSMUSG00000026074.15	Map4k4	chr1	39986624	39986800	39988969	39989042	39990088	39990278	0.00104058	0.00778696	0.0056264	0.868341	0.999593	0
ENSMUSG00000026074.15	Map4k4	chr1	39986624	39986800	39988969	39989453	39990088	39990278	0.0890992	0.214637	0.0360741	0.55631	0.943411	0
ENSMUSG00000026074.15	Map4k4	chr1	39997020	39997182	39999887	39999974	40000530	40000554	0.00168385	0.0198277	0.00772232	0.895309	0.999593	0
ENSMUSG00000026074.15	Map4k4	chr1	39997020	39997182	39999887	39999974	40000623	40000749	0.00204294	0.0128524	0.0220008	0.910237	0.999593	0
ENSMUSG00000026074.15	Map4k4	chr1	39997020	39997182	39999956	39999974	40000530	40000554	0.181034	0.257324	0	0.295192	0.896772	0
ENSMUSG00000026074.15	Map4k4	chr1	39997020	39997182	39999956	39999974	40000623	40000749	0.169355	0.217742	0.0684297	0.268163	0.896772	0
ENSMUSG00000026074.15	Map4k4	chr1	40000710	40000749	40001429	40001591	40003756	40003987	0.00956794	0.0643937	0.0739517	0.892359	0.999593	0
ENSMUSG00000026074.15	Map4k4	chr1	40000710	40000749	40001429	40001591	40003762	40003987	0.230086	0.131983	0.0990698	0.0767438	0.896772	0
ENSMUSG00000026074.15	Map4k4	chr1	40000710	40000749	40001429	40001591	40004806	40004910	0.021902	0.0161807	0.00766938	0.10403	0.896772	0
ENSMUSG00000026074.15	Map4k4	chr1	40000710	40000749	40001429	40001594	40003756	40003987	0.00502593	0.0183447	0.0127407	0.735006	0.984846	0
ENSMUSG00000026074.15	Map4k4	chr1	40000710	40000749	40001429	40001594	40004806	40004910	0.000663406	0.00306232	0.000781534	0.741581	0.987218	0
ENSMUSG00000026074.15	Map4k4	chr1	40000676	40000749	40001429	40003987	40004806	40004910	0.0405656	0.0125769	0.0274269	0.16304	0.896772	0
ENSMUSG00000026074.15	Map4k4	chr1	40000710	40000749	40003756	40003987	40004806	40004910	0.00255991	0.0219555	0.0137718	0.884893	0.999593	0
ENSMUSG00000026074.15	Map4k4	chr1	40000710	40000749	40003762	40003987	40004806	40004910	0.000279207	0.00588178	0.00141445	0.937974	0.999593	0
ENSMUSG00000026074.15	Map4k4	chr1	40001429	40001591	40003756	40003987	40004806	40004910	0.129451	0.0960532	0.0502248	0.110938	0.896772	0
ENSMUSG00000026074.15	Map4k4	chr1	40001429	40001591	40003762	40003987	40004806	40004910	0.0874615	0.136815	0.0503786	0.367576	0.910985	0
ENSMUSG00000026074.15	Map4k4	chr1	40004806	40004913	40006670	40006822	40007432	40007530	0.00258532	0.00572263	0.0083287	0.72514	0.982211	0
ENSMUSG00000026074.15	Map4k4	chr1	40004806	40004913	40006673	40006822	40007432	40007530	0.014435	0.0633677	0.0721538	0.828867	0.999593	0
ENSMUSG00000026074.15	Map4k4	chr1	40007432	40007530	40008330	40008339	40009687	40009863	0.0231188	0.0458019	0.0501515	0.629821	0.95677	0
ENSMUSG00000026074.15	Map4k4	chr1	40010556	40010677	40011649	40011841	40014105	40014223	0.00305096	0.0256475	0.0358491	0.918738	0.999593	0
ENSMUSG00000026074.15	Map4k4	chr1	40010556	40010677	40011649	40011841	40014169	40014223	0.113989	0.0596491	0.097047	0.233622	0.896772	0
ENSMUSG00000026074.15	Map4k4	chr1	40010556	40010677	40014105	40014223	40014526	40014697	0.0244073	0.0174955	0.0299935	0.379088	0.912876	0
ENSMUSG00000026074.15	Map4k4	chr1	40010556	40010677	40014169	40014223	40014526	40014697	1.11022e-16	0	0.0136083	0.996255	0.999593	0
ENSMUSG00000026074.15	Map4k4	chr1	40019543	40019678	40021083	40021184	40022704	40022854	0.0123846	0.00625289	0.00669632	0.105406	0.896772	0
ENSMUSG00000026074.15	Map4k4	chr1	40021083	40021184	40022704	40022854	40023359	40023373	0.00286287	0.00666173	0.00139057	0.517003	0.933552	0
ENSMUSG00000026072.12	Il1r1	chr1	40266656	40266881	40271735	40271921	40276097	40276177	0.0695828	0.185669	0.189222	0.712111	0.978451	0
ENSMUSG00000026072.12	Il1r1	chr1	40266656	40266881	40271735	40271921	40282232	40282296	0.0141035	0.0227249	0.0385324	0.683163	0.970237	0
ENSMUSG00000026072.12	Il1r1	chr1	40266656	40266881	40276097	40276177	40282232	40282296	0.00804619	0.0704985	0.0726924	0.907889	0.999593	0
ENSMUSG00000026072.12	Il1r1	chr1	40271735	40271921	40276097	40276177	40282232	40282296	0.0153199	0.0710148	0.0123803	0.757724	0.993481	0
ENSMUSG00000026072.12	Il1r1	chr1	40276101	40276177	40277121	40277331	40282232	40282296	0.0452816	0.0204252	0.121829	0.675627	0.967105	0
ENSMUSG00000070942.8	Il1rl2	chr1	40356818	40356962	40363191	40363353	40365026	40365471	0.116667	0.217945	0.0942809	0.438102	0.930278	0
ENSMUSG00000026070.15	Il18r1	chr1	40465551	40465781	40466160	40466269	40471728	40471814	0.0415907	0.0499638	0.10312	0.656762	0.963995	0
ENSMUSG00000026070.15	Il18r1	chr1	40465551	40465781	40466160	40466357	40471728	40471814	0.039301	0.0440446	0.0970539	0.653315	0.963464	0
ENSMUSG00000026070.15	Il18r1	chr1	40465675	40465810	40466160	40466269	40471728	40471814	0.038055	0.110602	0.0519525	0.653766	0.963468	0
ENSMUSG00000026070.15	Il18r1	chr1	40465675	40465810	40466160	40466357	40471728	40471814	0.038055	0.110602	0.0519525	0.653766	0.963468	0
ENSMUSG00000026068.11	Il18rap	chr1	40516396	40516535	40524215	40524382	40524793	40525115	0.0864186	0.158583	0.0701975	0.432381	0.930278	0
ENSMUSG00000026068.11	Il18rap	chr1	40525203	40525387	40531475	40531626	40537057	40537123	0.0320897	0.129564	0.0746519	0.721251	0.981403	0
ENSMUSG00000026068.11	Il18rap	chr1	40541886	40542038	40542989	40543127	40547766	40547903	0.0614247	0.103963	0.0272166	0.384072	0.915023	0
ENSMUSG00000026065.8	Slc9a4	chr1	40602852	40603070	40607008	40607211	40607748	40607835	0.011613	0.0217409	0.0471405	0.762877	0.995001	0
ENSMUSG00000026065.8	Slc9a4	chr1	40610316	40610387	40612122	40612284	40619039	40619136	0.0217806	0.0316052	0	0.319449	0.897575	0
ENSMUSG00000026065.8	Slc9a4	chr1	40623392	40623524	40624213	40624301	40629236	40630725	0.0666945	0.0897744	0.13373	0.571905	0.946564	0
ENSMUSG00000026065.8	Slc9a4	chr1	40623392	40623524	40624254	40624301	40629236	40630725	0.184424	0.27917	0.234819	0.499641	0.930962	0
ENSMUSG00000066877.11	Nck2	chr1	43509620	43509783	43512962	43513726	43533551	43533632	0.0133316	0.00480384	0.00591944	0.0608896	0.896772	0
ENSMUSG00000066877.11	Nck2	chr1	43509620	43509783	43512962	43513726	43533554	43533632	0.046748	0.0633677	0.0642126	0.459954	0.930278	0
ENSMUSG00000066877.11	Nck2	chr1	43509620	43509783	43513419	43513726	43533551	43533632	0.00685082	0	0.00527091	0.207216	0.896772	0
ENSMUSG00000041763.14	Tpp2	chr1	43934044	43934253	43936708	43936856	43940109	43940238	0.00264574	0.00875805	0.00482756	0.685113	0.97121	0
ENSMUSG00000041763.14	Tpp2	chr1	43972555	43972687	43973443	43973520	43975415	43975522	0.00679865	0.00807013	0.00138242	0.241547	0.896772	0
ENSMUSG00000041763.14	Tpp2	chr1	43978734	43978835	43980293	43980404	43981729	43981867	0.576854	0.0835211	0.233084	0.0825165	0.896772	0
ENSMUSG00000041763.14	Tpp2	chr1	43978734	43978835	43980307	43980404	43981729	43981867	0.0161733	0.00841325	0.0176605	0.325631	0.898287	0
ENSMUSG00000041763.14	Tpp2	chr1	43983513	43983592	43985395	43985454	43990510	43990584	0.00474281	0.0103098	0.0151253	0.724082	0.98183	0
ENSMUSG00000041763.14	Tpp2	chr1	43983513	43983592	43985415	43985454	43990510	43990584	0.0528787	0.0624963	0.0836178	0.494704	0.930962	0
ENSMUSG00000056870.9	Gulp1	chr1	44689143	44689215	44708616	44708678	44744473	44744545	0.00857843	0.0241082	0.00693242	0.591513	0.948315	0
ENSMUSG00000026043.18	Col3a1	chr1	45337240	45337339	45337425	45337533	45337957	45338011	0.00852874	0.00676582	0.0109605	0.398018	0.922474	0
ENSMUSG00000025995.16	Wdr75	chr1	45802038	45802129	45803876	45804001	45805376	45805447	0.013428	0.0138196	0.0302737	0.602577	0.950077	0
ENSMUSG00000041144.12	Dnah7b	chr1	46081434	46081497	46083704	46083813	46085554	46085702	0.22697	0.208293	0.183419	0.228619	0.896772	0
ENSMUSG00000041144.12	Dnah7b	chr1	46081434	46081497	46083704	46083813	46097997	46098085	0.164101	0.165356	0.0720082	0.186497	0.896772	0
ENSMUSG00000041144.12	Dnah7b	chr1	46081434	46081497	46085554	46085702	46097997	46098085	0	0.0162821	0	0.992586	0.999593	0
ENSMUSG00000041144.12	Dnah7b	chr1	46083704	46083813	46085554	46085702	46097997	46098085	0.052484	0.0821488	0.177823	0.762647	0.995001	0
ENSMUSG00000041144.12	Dnah7b	chr1	46099417	46099598	46109264	46109340	46116168	46116294	0.0479167	0.0933836	0.0673435	0.532852	0.9391	0
ENSMUSG00000041144.12	Dnah7b	chr1	46109264	46109340	46116168	46116294	46119259	46119379	0.0587859	0.0332365	0.0551783	0.275287	0.896772	0
ENSMUSG00000041144.12	Dnah7b	chr1	46134501	46134726	46137411	46137558	46139505	46140191	0.207377	0.168232	0.0543928	0.132668	0.896772	0
ENSMUSG00000041144.12	Dnah7b	chr1	46141977	46142164	46144660	46144730	46175286	46178717	0.0604197	0.0533922	0.0282843	0.165771	0.896772	0
ENSMUSG00000041144.12	Dnah7b	chr1	46182340	46182481	46187154	46187367	46188575	46188685	0.207407	0.219181	0.16761	0.285066	0.896772	0
ENSMUSG00000041144.12	Dnah7b	chr1	46188575	46188685	46190896	46191048	46191650	46191819	0.0302469	0.112263	0.0244432	0.713354	0.97868	0
ENSMUSG00000041144.12	Dnah7b	chr1	46217076	46217208	46219320	46219545	46221578	46221776	0.0159946	0.0791148	0.0346291	0.757162	0.993249	0
ENSMUSG00000041144.12	Dnah7b	chr1	46223071	46223227	46224608	46224777	46225765	46225892	0	0.094591	0	0.961154	0.999593	0
ENSMUSG00000026104.14	Stat1	chr1	52132543	52132633	52135602	52135681	52136878	52136970	0.0240956	0.0265008	0.00994352	0.225353	0.896772	0
ENSMUSG00000026096.14	Osgepl1	chr1	53321079	53321210	53321495	53321567	53323166	53323270	0.0964023	0.299693	0.0779048	0.713117	0.97868	0
ENSMUSG00000025981.13	Coq10b	chr1	55052769	55052990	55061274	55061424	55064180	55064373	0.00562592	0.0220955	0.0131466	0.732979	0.984789	0
ENSMUSG00000025979.13	Mob4	chr1	55131325	55131359	55136676	55136739	55145123	55145224	0.00256207	0.00824422	0.00864119	0.75689	0.993168	0
ENSMUSG00000025979.13	Mob4	chr1	55136676	55136739	55145123	55145224	55148318	55148361	0.00527191	0.0242036	0.00279358	0.726817	0.982802	0
ENSMUSG00000025979.13	Mob4	chr1	55136676	55136739	55145123	55145224	55148547	55148634	0	0.25713	0	0.899853	0.999593	0
ENSMUSG00000025979.13	Mob4	chr1	55145123	55145224	55148318	55148361	55148547	55148634	0.00536002	0.0268306	0.0402418	0.884439	0.999593	0
ENSMUSG00000025971.6	Maip1	chr1	57406327	57407222	57409911	57409983	57411722	57411849	0.0139357	0.0194766	0.00772794	0.323039	0.897987	0
ENSMUSG00000038305.15	Spats2l	chr1	57799304	57799354	57832052	57832137	57855463	57855524	0.0151242	0.0141538	0.0066395	0.175093	0.896772	0
ENSMUSG00000038305.15	Spats2l	chr1	57885702	57885949	57900633	57900840	57902088	57902109	0.0368003	0.19366	0.0869343	0.732099	0.984738	0
ENSMUSG00000051223.14	Bzw1	chr1	58393131	58393216	58394201	58394275	58397675	58397852	0.000944519	0.00590472	0.00348543	0.830586	0.999593	0
ENSMUSG00000026036.17	Nif3l1	chr1	58455596	58455735	58457779	58457863	58461140	58461384	0.0265645	0.0707444	0.130946	0.794277	0.999593	0
ENSMUSG00000026032.8	Ndufb3	chr1	58586383	58586670	58591089	58591249	58595648	58595964	0.010607	0.00558726	0.0146404	0.416395	0.926168	0
ENSMUSG00000026031.15	Cflar	chr1	58711559	58711592	58713295	58713659	58726305	58726349	0.0686275	0.0509427	0.0554594	0.238605	0.896772	0
ENSMUSG00000026031.15	Cflar	chr1	58711559	58711592	58713570	58713659	58726305	58726349	0.0301405	0.00569754	0.0382384	0.381637	0.914093	0
ENSMUSG00000026031.15	Cflar	chr1	58713570	58713659	58726224	58726240	58726381	58726732	0.102657	0.0188266	0.123798	0.356017	0.905807	0
ENSMUSG00000026031.15	Cflar	chr1	58726595	58726732	58729055	58729161	58731151	58731246	0.00287753	0.0452985	0.0363471	0.936922	0.999593	0
ENSMUSG00000026031.15	Cflar	chr1	58726381	58726732	58731151	58731287	58735657	58735712	0.0905303	0.0462936	0.0373253	0.0629074	0.896772	0
ENSMUSG00000026031.15	Cflar	chr1	58731151	58731287	58732252	58732326	58735657	58735712	0.0110519	0.0327442	0.0268917	0.696177	0.973015	0
ENSMUSG00000026029.14	Casp8	chr1	58823914	58824247	58827206	58827312	58828872	58829011	0.0383716	0.0374086	0.0286216	0.251684	0.896772	0
ENSMUSG00000026029.14	Casp8	chr1	58823914	58824247	58827206	58828167	58828872	58829011	0.115196	0.0778701	0.116291	0.319136	0.897575	0
ENSMUSG00000026029.14	Casp8	chr1	58823914	58824247	58827869	58828167	58828872	58829011	0.00623487	0.0185577	0.0239697	0.774908	0.999322	0
ENSMUSG00000026029.14	Casp8	chr1	58823914	58825922	58827206	58827312	58828872	58829011	0.0951754	0.0706494	0.0769134	0.241848	0.896772	0
ENSMUSG00000026029.14	Casp8	chr1	58827206	58827312	58827869	58828167	58828872	58829011	0.002986	0.00353308	0.000529074	0.240128	0.896772	0
ENSMUSG00000026029.14	Casp8	chr1	58829095	58829149	58831605	58831667	58833632	58833774	0.00348817	0.028727	0.0204797	0.876685	0.999593	0
ENSMUSG00000026027.13	Stradb	chr1	58985288	58985388	58988505	58988627	58989689	58989798	0.0875	0.0216506	0.0707107	0.224954	0.896772	0
ENSMUSG00000026027.13	Stradb	chr1	58991057	58991136	58992203	58992375	58992650	58992755	0.107973	0.0512793	0.0864067	0.222632	0.896772	0
ENSMUSG00000026020.9	Nop58	chr1	59685053	59685226	59688569	59688619	59690485	59690562	0.000722977	0.00352136	0.00430973	0.85468	0.999593	0
ENSMUSG00000026020.9	Nop58	chr1	59692336	59692389	59692551	59692728	59695977	59696099	0.00783121	0.00833503	0.00280399	0.207119	0.896772	0
ENSMUSG00000026020.9	Nop58	chr1	59698415	59698459	59700884	59700949	59702812	59702947	0.0112011	0.0143503	0.0182446	0.508551	0.931544	0
ENSMUSG00000026020.9	Nop58	chr1	59704623	59704750	59705592	59705756	59706632	59706767	0.000109373	0.00460577	0.00626196	0.983635	0.999593	0
ENSMUSG00000026020.9	Nop58	chr1	59707029	59707064	59709002	59709136	59710494	59710652	0.00241873	0.00429069	0.00209603	0.443383	0.930278	0
ENSMUSG00000026020.9	Nop58	chr1	59707002	59707064	59710494	59710652	59711270	59711510	0	0.0151523	0	0.993003	0.999593	0
ENSMUSG00000041040.12	Fam117b	chr1	59949052	59949204	59952934	59953024	59958321	59958435	0.00400467	0.00471398	0.00284103	0.290779	0.896772	0
ENSMUSG00000041040.12	Fam117b	chr1	59958321	59958435	59968953	59969097	59970485	59970711	0.0271978	0.0391083	0.0233369	0.375961	0.911817	0
ENSMUSG00000041040.12	Fam117b	chr1	59970679	59970711	59974882	59975003	59981408	59981515	0.0581869	0.031721	0.044401	0.199723	0.896772	0
ENSMUSG00000026017.13	Carf	chr1	60098263	60098307	60102626	60102784	60105310	60105434	0.0830741	0.0943689	0.0274008	0.235873	0.896772	0
ENSMUSG00000026017.13	Carf	chr1	60105343	60105427	60108082	60108200	60109221	60109449	0.0060049	0.180116	0.00485269	0.897244	0.999593	0
ENSMUSG00000026017.13	Carf	chr1	60105343	60105427	60108082	60108200	60109326	60109449	0.132546	0.190923	0.152017	0.408405	0.922474	0
ENSMUSG00000026017.13	Carf	chr1	60105310	60105434	60108082	60108200	60109221	60109449	0	0.216634	0	0.922707	0.999593	0
ENSMUSG00000026017.13	Carf	chr1	60105310	60105434	60108082	60108200	60109326	60109449	0.00701754	0.101072	0.0452112	0.945267	0.999593	0
ENSMUSG00000026017.13	Carf	chr1	60125919	60126034	60127988	60128073	60131843	60131873	0.08125	0.0854675	0	0.199546	0.896772	0
ENSMUSG00000026017.13	Carf	chr1	60131843	60132033	60136263	60136384	60139199	60139343	0.0685364	0.111551	0.0589256	0.412684	0.924025	0
ENSMUSG00000026017.13	Carf	chr1	60141447	60141568	60143993	60144156	60146108	60146172	0.113772	0.126583	0.0556734	0.231088	0.896772	0
ENSMUSG00000073664.11	Nbeal1	chr1	60200863	60200991	60206333	60206416	60222066	60222373	0.0402608	0.0410056	0.0153984	0.195257	0.896772	0
ENSMUSG00000073664.11	Nbeal1	chr1	60206333	60206416	60215160	60215308	60217195	60217281	0.012941	0.0130736	0.0218041	0.506435	0.930962	0
ENSMUSG00000073664.11	Nbeal1	chr1	60206333	60206416	60217195	60217281	60222066	60222373	0.0143101	0.0705205	0.128293	0.869193	0.999593	0
ENSMUSG00000073664.11	Nbeal1	chr1	60217195	60217281	60218909	60219021	60222066	60222373	0.0206051	0.0130026	0.00213305	0.0684525	0.896772	0
ENSMUSG00000073664.11	Nbeal1	chr1	60224624	60224731	60228621	60228708	60230601	60230685	0.0763952	0.0698436	0.0413329	0.182115	0.896772	0
ENSMUSG00000073664.11	Nbeal1	chr1	60224624	60224731	60228641	60228708	60230601	60230685	0.160711	0.0807305	0	0.036631	0.896772	0
ENSMUSG00000073664.11	Nbeal1	chr1	60257429	60257589	60258649	60258738	60260232	60260793	0.0240031	0.0356278	0.00420897	0.329856	0.900193	0
ENSMUSG00000073664.11	Nbeal1	chr1	60270271	60270429	60272132	60272257	60277124	60277251	0.000103661	0.0208315	0.0239591	0.995002	0.999593	0
ENSMUSG00000073664.11	Nbeal1	chr1	60279698	60279800	60281246	60281342	60281824	60281949	0.0545594	0.0502462	0.104688	0.543016	0.941949	0
ENSMUSG00000049439.13	Cyp20a1	chr1	60352120	60352170	60352908	60353075	60354513	60354656	0.0270375	0.0070568	0.00714249	0.0121441	0.896772	0
ENSMUSG00000049439.13	Cyp20a1	chr1	60363189	60363357	60366648	60366727	60371220	60371336	0.00285631	0.0288661	0.0298573	0.920188	0.999593	0
ENSMUSG00000026782.15	Abi2	chr1	60443984	60444082	60447259	60447406	60448077	60448202	0.0291783	0.061859	0.00924323	0.473984	0.930278	0
ENSMUSG00000026782.15	Abi2	chr1	60453603	60453762	60464528	60464615	60470665	60470839	0.0637175	0.135612	0.122013	0.616748	0.952419	0
ENSMUSG00000052062.14	Pard3b	chr1	62076384	62076494	62144846	62144935	62153932	62154019	0.0434461	0.0889576	0.0500036	0.50728	0.931365	0
ENSMUSG00000025969.15	Nrp2	chr1	62718929	62719107	62738288	62738470	62744174	62744405	0.000755677	0.0393648	0.0251263	0.974099	0.999593	0
ENSMUSG00000025969.15	Nrp2	chr1	62786280	62786301	62812533	62812584	62815332	62818695	0.0292857	0.0815952	0.0389569	0.637303	0.959282	0
ENSMUSG00000025969.15	Nrp2	chr1	62786280	62786316	62812533	62812584	62815332	62818695	0.0307292	0.0892999	0.0768065	0.705748	0.976529	0
ENSMUSG00000025967.16	Eef1b2	chr1	63177129	63177291	63177722	63177876	63178438	63178565	0.21443	0.0998928	0.151414	0.18534	0.896772	0
ENSMUSG00000025967.16	Eef1b2	chr1	63177129	63177291	63177753	63177876	63178438	63178565	0.00251274	0.00135007	0.00374574	0.445856	0.930278	0
ENSMUSG00000025967.16	Eef1b2	chr1	63177753	63177876	63178027	63178264	63178438	63178565	0.000444157	0.000457495	0.000586087	0.423094	0.928799	0
ENSMUSG00000025962.15	Fastkd2	chr1	63735462	63735571	63735844	63735968	63737778	63737918	0.0694444	0.129729	0.0561196	0.444997	0.930278	0
ENSMUSG00000025958.14	Creb1	chr1	64532893	64533020	64550848	64550970	64558502	64558649	0.032444	0.0386034	0.0226153	0.288376	0.896772	0
ENSMUSG00000025958.14	Creb1	chr1	64558502	64558649	64559726	64559768	64561752	64561865	0.0872141	0.0647396	0.0704796	0.24066	0.896772	0
ENSMUSG00000025958.14	Creb1	chr1	64558502	64558649	64559726	64559768	64566216	64566317	0.0742495	0.0755556	0.0371384	0.212465	0.896772	0
ENSMUSG00000025958.14	Creb1	chr1	64558502	64558649	64561752	64561865	64566216	64566317	0.00653835	0.0110677	0.0160424	0.651646	0.963096	0
ENSMUSG00000025958.14	Creb1	chr1	64559726	64559768	64561752	64561865	64566216	64566317	0.0340351	0.302747	0.0275045	0.989962	0.999593	0
ENSMUSG00000025958.14	Creb1	chr1	64570168	64570276	64574072	64574114	64576178	64576329	0.0897436	0.16765	0.0725238	0.477207	0.930278	0
ENSMUSG00000025958.14	Creb1	chr1	64570168	64570276	64574072	64574255	64576178	64576329	0.00669409	0.0575361	0.0465651	0.887932	0.999593	0
ENSMUSG00000025958.14	Creb1	chr1	64574072	64574255	64575195	64575259	64576178	64576329	0.00057366	0.0210498	0.0163893	0.970462	0.999593	0
ENSMUSG00000070871.10	Ccnyl1	chr1	64700968	64701043	64702345	64702380	64708377	64708478	0.0831235	0.139468	0.0599003	0.407455	0.922474	0
ENSMUSG00000070871.10	Ccnyl1	chr1	64700968	64701043	64702345	64702380	64713110	64713162	0.200926	0.111423	0.162373	0.241485	0.896772	0
ENSMUSG00000070871.10	Ccnyl1	chr1	64700968	64701043	64708377	64708478	64713110	64713162	0.131944	0.104929	0.106627	0.252054	0.896772	0
ENSMUSG00000070871.10	Ccnyl1	chr1	64702345	64702380	64708377	64708478	64711417	64711453	0.153253	0.165881	0.0461477	0.207297	0.896772	0
ENSMUSG00000070871.10	Ccnyl1	chr1	64702345	64702380	64708377	64708478	64713110	64713162	0.0767331	0.22058	0.0483602	0.542809	0.941949	0
ENSMUSG00000070871.10	Ccnyl1	chr1	64702345	64702380	64711417	64711453	64713110	64713162	0.0670322	0.0565403	0.0489925	0.228891	0.896772	0
ENSMUSG00000070871.10	Ccnyl1	chr1	64708377	64708478	64711417	64711453	64713110	64713162	0.0479385	0.068086	0.0468295	0.400259	0.922474	0
ENSMUSG00000025949.16	Pikfyve	chr1	65192144	65192294	65192530	65192566	65195655	65195774	0.0511578	0.0672213	0.0386959	0.341944	0.901782	0
ENSMUSG00000025949.16	Pikfyve	chr1	65192144	65192294	65192533	65192566	65195655	65195774	0.112034	0.0461643	0.0384494	0.038577	0.896772	0
ENSMUSG00000025949.16	Pikfyve	chr1	65195655	65195774	65196611	65196783	65202715	65202923	0.0653243	0.065653	0.018241	0.186812	0.896772	0
ENSMUSG00000025949.16	Pikfyve	chr1	65223504	65223652	65224161	65224329	65230793	65230853	0.0563985	0.0889397	0.108727	0.565442	0.945441	0
ENSMUSG00000025949.16	Pikfyve	chr1	65262879	65262975	65264346	65264430	65265248	65265346	0.00599952	0.0453731	0.0133061	0.82947	0.999593	0
ENSMUSG00000015222.18	Map2	chr1	66175315	66175495	66193118	66193181	66251661	66251712	0.0206973	0.0460992	0.0643181	0.707128	0.976914	0
ENSMUSG00000015222.18	Map2	chr1	66362202	66362280	66380488	66380773	66399388	66399502	0.0310798	0.00541266	0.0244339	0.210736	0.896772	0
ENSMUSG00000015222.18	Map2	chr1	66425196	66425528	66431526	66431619	66433513	66433595	0.0445702	0.040423	0.103935	0.601579	0.950077	0
ENSMUSG00000026005.15	Rpe	chr1	66700906	66701017	66701616	66701636	66706445	66706525	0.0311669	0.183443	0.111469	0.865557	0.999593	0
ENSMUSG00000026005.15	Rpe	chr1	66700906	66701017	66701616	66701648	66706445	66706525	0.054046	0.165572	0.141848	0.720471	0.981342	0
ENSMUSG00000026005.15	Rpe	chr1	66700830	66701028	66701616	66701636	66706445	66706525	0.0227315	0.0154631	0.0288988	0.391625	0.918824	0
ENSMUSG00000026005.15	Rpe	chr1	66700830	66701028	66701616	66701648	66706445	66706525	0.0241587	0.0154621	0.0144938	0.141819	0.896772	0
ENSMUSG00000026005.15	Rpe	chr1	66701616	66701636	66706445	66706525	66714576	66714716	0.0336538	0.0249815	0.0271964	0.230833	0.896772	0
ENSMUSG00000026005.15	Rpe	chr1	66706445	66706525	66714576	66714716	66715112	66715150	0.010453	0.0127037	0.0108798	0.373525	0.910985	0
ENSMUSG00000026005.15	Rpe	chr1	66714576	66714716	66715112	66715247	66715958	66716045	0.00384255	0.0111706	0.00783554	0.671546	0.966548	0
ENSMUSG00000026192.13	Atic	chr1	71557496	71557623	71559225	71559302	71560888	71563198	0.0182153	0	0.0221432	0.365315	0.91039	0
ENSMUSG00000026192.13	Atic	chr1	71564405	71564557	71564810	71564967	71567813	71567939	0.00871315	0.0101031	0.00196419	0.233093	0.896772	0
ENSMUSG00000099707.6	Gm8883	chr1	71888618	71888714	71889631	71889735	71890303	71890587	0	0	0.0712655	0.967275	0.999593	0
ENSMUSG00000026187.9	Xrcc5	chr1	72326215	72326354	72329925	72330038	72334635	72334698	0.0589921	0	0.0394511	0.171393	0.896772	0
ENSMUSG00000046330.10	Rpl37a	chr1	72712141	72712224	72713181	72713339	72713501	72713596	0.000845456	0.0011177	0	0.281339	0.896772	0
ENSMUSG00000006304.14	Arpc2	chr1	74236817	74236899	74246079	74246114	74248131	74248244	0.00415995	0.00516723	0.00174831	0.26831	0.896772	0
ENSMUSG00000006304.14	Arpc2	chr1	74248131	74248244	74251253	74251299	74254827	74255014	0.00354925	0.00485935	0.0064679	0.549401	0.943134	0
ENSMUSG00000006304.14	Arpc2	chr1	74248131	74248244	74251253	74253845	74254827	74255014	0.325758	0.408459	0.471405	0.448273	0.930278	0
ENSMUSG00000006304.14	Arpc2	chr1	74262458	74262585	74263742	74263843	74264352	74264453	0.000370439	0.00122527	0.00288198	0.876152	0.999593	0
ENSMUSG00000026175.12	Vil1	chr1	74409375	74409436	74414222	74414304	74415068	74415154	0.00984418	0.0068985	0.00155067	0.0861221	0.896772	0
ENSMUSG00000026175.12	Vil1	chr1	74415068	74415154	74415965	74416040	74418359	74418370	0.00492824	0.00890835	0.00357125	0.435121	0.930278	0
ENSMUSG00000026175.12	Vil1	chr1	74430616	74430685	74431075	74431138	74432290	74432431	0.00264626	0.00300867	0	0.224856	0.896772	0
ENSMUSG00000033257.14	Ttll4	chr1	74661816	74661889	74672843	74673010	74678897	74678931	0.0664746	0.0705252	0.113468	0.518554	0.934396	0
ENSMUSG00000033257.14	Ttll4	chr1	74661816	74662007	74672843	74673010	74678897	74678931	0.135041	0.100242	0.22712	0.541792	0.941552	0
ENSMUSG00000033257.14	Ttll4	chr1	74687203	74687395	74687477	74687560	74687722	74687851	0.0012441	0.0444116	0.0191847	0.957346	0.999593	0
ENSMUSG00000033257.14	Ttll4	chr1	74690072	74690106	74690693	74690889	74695707	74695810	0.0173637	0.0158161	0.0140718	0.260925	0.896772	0
ENSMUSG00000026199.17	Ankzf1	chr1	75192159	75192622	75194177	75194284	75194840	75194943	0.0831155	0.0670843	0.0671674	0.237736	0.896772	0
ENSMUSG00000026199.17	Ankzf1	chr1	75192191	75192677	75194177	75194284	75194840	75194943	0.0147439	0.13493	0.0302815	0.82524	0.999593	0
ENSMUSG00000026201.12	Stk16	chr1	75212002	75212144	75212599	75212733	75213053	75213137	0.166667	0.123718	0.134687	0.221512	0.896772	0
ENSMUSG00000026203.16	Dnajb2	chr1	75237454	75237564	75239279	75239333	75239507	75239630	0.0329873	0.0877219	0.195113	0.882331	0.999593	0
ENSMUSG00000026203.16	Dnajb2	chr1	75243457	75243661	75244562	75244590	75244793	75244804	0	0.141999	0	0.920321	0.999593	0
ENSMUSG00000033021.16	Gmppa	chr1	75435967	75436011	75436114	75436312	75436777	75436838	0.0347773	0.0777977	0.0732296	0.63218	0.957795	0
ENSMUSG00000033021.16	Gmppa	chr1	75435981	75436011	75436145	75436312	75436777	75436838	0.00755162	0.0436106	0.0399041	0.854268	0.999593	0
ENSMUSG00000026213.15	Stk11ip	chr1	75527968	75528118	75528308	75528393	75528910	75529261	0.00657647	0.0106479	0.00921154	0.4987	0.930962	0
ENSMUSG00000026213.15	Stk11ip	chr1	75534171	75534253	75534403	75534474	75535177	75535425	0.0341287	0.0488307	0	0.314441	0.896772	0
ENSMUSG00000006576.16	Slc4a3	chr1	75546532	75546613	75546771	75546921	75547232	75547398	0.0103217	0.0377635	0.00301119	0.660328	0.964488	0
ENSMUSG00000006576.16	Slc4a3	chr1	75546532	75546613	75546814	75546921	75547232	75547398	0.0321352	0.0674956	0.00522357	0.462172	0.930278	0
ENSMUSG00000006576.16	Slc4a3	chr1	75546814	75546921	75547232	75547398	75547943	75548011	0.0375579	0.0979488	0.0836656	0.675145	0.967105	0
ENSMUSG00000006576.16	Slc4a3	chr1	75546814	75546921	75547232	75547532	75547943	75548011	0.0962753	0.210326	0.0595338	0.474513	0.930278	0
ENSMUSG00000006576.16	Slc4a3	chr1	75552152	75552252	75552622	75552807	75553255	75553481	0.00818182	0.0173205	0.025713	0.716838	0.979649	0
ENSMUSG00000006576.16	Slc4a3	chr1	75553623	75553842	75554159	75554308	75554501	75554696	0.0470035	0	0.0358482	0.205571	0.896772	0
ENSMUSG00000032883.15	Acsl3	chr1	78657882	78658103	78681592	78682010	78688236	78688414	0.00235826	0.0215028	0.0207973	0.90795	0.999593	0
ENSMUSG00000032883.15	Acsl3	chr1	78694264	78694346	78696080	78696204	78696428	78696500	0.00229992	0.0154604	0.00833954	0.841525	0.999593	0
ENSMUSG00000032883.15	Acsl3	chr1	78701268	78701460	78703485	78703600	78705233	78705391	0.00222794	0.00718172	0.00676657	0.740951	0.986968	0
ENSMUSG00000026142.15	Rhbdd1	chr1	82368291	82368380	82370333	82370390	82377560	82377704	0.00387197	0.0222058	0.0126552	0.811513	0.999593	0
ENSMUSG00000026142.15	Rhbdd1	chr1	82377560	82377704	82378965	82379031	82442862	82445366	0.045517	0.0457504	0	0.183188	0.896772	0
ENSMUSG00000026150.14	Mff	chr1	82727227	82727336	82728066	82728238	82729215	82729436	0.00269399	0.00840609	0.00553354	0.685307	0.97121	0
ENSMUSG00000026150.14	Mff	chr1	82729215	82729436	82731112	82731282	82735418	82735507	0.0132552	0.0113636	0.0244528	0.532013	0.93859	0
ENSMUSG00000026150.14	Mff	chr1	82735419	82735507	82741817	82741976	82747082	82747142	0.036059	0.0713574	0.0739966	0.611765	0.951398	0
ENSMUSG00000026150.14	Mff	chr1	82735419	82735507	82741817	82741976	82750519	82750604	0.0498157	0.0534678	0.0176756	0.214582	0.896772	0
ENSMUSG00000026150.14	Mff	chr1	82735415	82735507	82747082	82747142	82750519	82750581	0.0298151	0.032487	0.0645005	0.587372	0.948071	0
ENSMUSG00000026150.14	Mff	chr1	82741817	82741976	82745523	82745556	82747082	82747142	0.00163167	0.163508	0.0825515	0.930655	0.999593	0
ENSMUSG00000026150.14	Mff	chr1	82741817	82741976	82747082	82747142	82750519	82750581	0.0854017	0.0997335	0.108064	0.427264	0.930278	0
ENSMUSG00000026159.13	Agfg1	chr1	82839733	82839889	82858355	82858449	82870684	82870800	0.00325948	0.0338376	0.0195676	0.903722	0.999593	0
ENSMUSG00000026159.13	Agfg1	chr1	82875287	82875450	82876170	82876324	82880007	82880122	0.0265125	0.0160375	0.0286676	0.326248	0.898978	0
ENSMUSG00000026159.13	Agfg1	chr1	82876170	82876324	82880007	82880127	82882227	82882437	0.0417716	0.0234973	0.0287161	0.170812	0.896772	0
ENSMUSG00000026159.13	Agfg1	chr1	82886113	82886187	82886374	82886467	82893423	82893582	0.029265	0.159446	0.0507983	0.742068	0.987262	0
ENSMUSG00000036707.16	Cab39	chr1	85793778	85793821	85795356	85795473	85818356	85818513	0.0205813	0.0102774	0.00161215	0.0373453	0.896772	0
ENSMUSG00000036707.16	Cab39	chr1	85793778	85793821	85795360	85795473	85818356	85818513	0.00537304	0.00690715	0.00602766	0.402588	0.922474	0
ENSMUSG00000036707.16	Cab39	chr1	85842197	85842366	85844592	85844652	85847409	85847475	0.00550887	0.019245	0.00792277	0.676878	0.967561	0
ENSMUSG00000026223.15	Itm2c	chr1	85905273	85905402	85906421	85906532	85907007	85907158	0.00897885	0.00773796	0.00202272	0.135956	0.896772	0
ENSMUSG00000026229.17	Psmd1	chr1	86070582	86070626	86071420	86071523	86071613	86071660	0.00275256	0.000638662	0.000745594	0.0140653	0.896772	0
ENSMUSG00000026229.17	Psmd1	chr1	86075798	86076004	86077355	86077499	86078567	86078794	0.0139624	0	0.015586	0.333341	0.900193	0
ENSMUSG00000062590.13	Armc9	chr1	86213052	86213105	86218847	86218898	86244565	86244670	0.0965706	0	0.02909	0.0398348	0.896772	0
ENSMUSG00000062590.13	Armc9	chr1	86244565	86244670	86252276	86252392	86257225	86257362	0.147613	0.119326	0.0453609	0.116559	0.896772	0
ENSMUSG00000026238.14	Ptma	chr1	86526932	86526950	86527848	86528012	86528774	86528856	0.0276486	0.0487496	0.016755	0.426235	0.930278	0
ENSMUSG00000026238.14	Ptma	chr1	86526931	86526950	86527848	86528856	86529172	86529244	5.96657e-05	9.89731e-05	6.09662e-05	0.442745	0.930278	0
ENSMUSG00000026238.14	Ptma	chr1	86526932	86526950	86528774	86528856	86529172	86529244	4.69971e-06	0.00044255	0.000285473	0.988911	0.999593	0
ENSMUSG00000026238.14	Ptma	chr1	86529172	86529244	86529455	86529552	86529730	86529745	0.0078514	0.00598872	0.0018764	0.10484	0.896772	0
ENSMUSG00000026238.14	Ptma	chr1	86529172	86529244	86529455	86529552	86529964	86530371	0.153282	0.188919	0.0802505	0.273268	0.896772	0
ENSMUSG00000026238.14	Ptma	chr1	86529172	86529244	86529730	86529804	86529964	86530371	0.0427815	0.0795443	0.0688797	0.551148	0.943411	0
ENSMUSG00000026238.14	Ptma	chr1	86529455	86529552	86529730	86529804	86529964	86530371	0.00194345	0.00262418	0.00173105	0.364084	0.909703	0
ENSMUSG00000026240.12	Cops7b	chr1	86589163	86589341	86592290	86592366	86596750	86596839	0.024699	0	0.0199193	0.222201	0.896772	0
ENSMUSG00000026240.12	Cops7b	chr1	86592290	86592366	86596750	86596839	86599002	86599205	0.0296675	0.0644694	0.0631165	0.634411	0.958755	0
ENSMUSG00000053333.15	Dis3l2	chr1	86744680	86744828	86745340	86745498	86754226	86754280	0.0516874	0.0252578	0.0306439	0.126208	0.896772	0
ENSMUSG00000053333.15	Dis3l2	chr1	86760287	86760389	86791415	86791457	86812511	86812589	0.0747038	0.120499	0.0595705	0.383896	0.914938	0
ENSMUSG00000053333.15	Dis3l2	chr1	86760287	86760389	86791415	86791457	86821221	86821450	0.0768939	0.108606	0.0784106	0.398168	0.922474	0
ENSMUSG00000053333.15	Dis3l2	chr1	86760287	86760389	86812511	86812589	86821221	86821450	0.231435	0.105983	0.0896421	0.0449794	0.896772	0
ENSMUSG00000053333.15	Dis3l2	chr1	86791415	86791457	86812511	86812589	86821221	86821450	0.0972222	0.181621	0.0785674	0.436168	0.930278	0
ENSMUSG00000053333.15	Dis3l2	chr1	86812511	86812589	86813654	86813714	86821221	86821450	0.0504808	0.102824	0.0362619	0.488094	0.930962	0
ENSMUSG00000026254.17	Eif4e2	chr1	87213978	87214019	87214345	87214495	87219580	87219695	0.00558416	0.028737	0.0455386	0.874795	0.999593	0
ENSMUSG00000026254.17	Eif4e2	chr1	87226096	87226233	87232402	87232481	87237845	87237901	0.0527778	0.136708	0.0361264	0.590693	0.948299	0
ENSMUSG00000048000.15	Gigyf2	chr1	87327065	87327092	87334269	87334334	87354403	87354486	0.0299033	0.00338772	0.00553095	0.00666254	0.896772	0
ENSMUSG00000048000.15	Gigyf2	chr1	87354445	87354486	87354980	87355158	87364103	87364233	0.0655136	0.0670102	0	0.188152	0.896772	0
ENSMUSG00000048000.15	Gigyf2	chr1	87365183	87365279	87373996	87374111	87378971	87379002	0.01045	0.019744	0.0457272	0.793722	0.999593	0
ENSMUSG00000048000.15	Gigyf2	chr1	87365183	87365279	87373996	87374111	87403666	87403846	0.155997	0.113606	0.136101	0.26398	0.896772	0
ENSMUSG00000048000.15	Gigyf2	chr1	87411707	87411867	87416817	87416984	87419087	87419179	0.0368512	0.0268134	0.00373832	0.0959616	0.896772	0
ENSMUSG00000048000.15	Gigyf2	chr1	87440716	87440922	87442010	87442165	87443644	87443826	0.00718022	0.0246357	0.0234237	0.756532	0.992821	0
ENSMUSG00000026289.15	Atg16l1	chr1	87774144	87774231	87774812	87774869	87775756	87775859	0.0247513	0.09891	0.0632234	0.718457	0.980689	0
ENSMUSG00000070738.10	Dgkd	chr1	87918558	87918721	87921572	87921681	87924071	87924211	0.048887	0.0585018	0.0622496	0.427404	0.930278	0
ENSMUSG00000070738.10	Dgkd	chr1	87927684	87927810	87929740	87929837	87931931	87932042	0.00392063	0.00201697	0.00415838	0.313864	0.896772	0
ENSMUSG00000070738.10	Dgkd	chr1	87934396	87934501	87935256	87935451	87936283	87936418	0.0754902	0.327132	0.0453954	0.832908	0.999593	0
ENSMUSG00000070738.10	Dgkd	chr1	87934396	87934501	87935337	87935451	87936283	87936418	0.0381975	0.0262242	0.0224067	0.147057	0.896772	0
ENSMUSG00000070738.10	Dgkd	chr1	87940176	87940306	87941368	87941499	87942382	87944490	0.0123859	0.0657953	0.042722	0.79664	0.999593	0
ENSMUSG00000090124.7	Ugt1a7c	chr1	88215043	88215175	88215794	88215882	88216137	88216357	0.0166418	0.020673	0.0196419	0.407994	0.922474	0
ENSMUSG00000036206.12	Sh3bp4	chr1	89107257	89107336	89112743	89112859	89137558	89137803	0.00121236	0.00709857	0.00408142	0.820505	0.999593	0
ENSMUSG00000036206.12	Sh3bp4	chr1	89107257	89107336	89137558	89137803	89143549	89145906	0.0146488	0.0290034	0.00954409	0.468596	0.930278	0
ENSMUSG00000055013.16	Agap1	chr1	89609495	89609583	89610283	89610295	89627760	89627846	0.00385645	0.00837094	0.00232561	0.497248	0.930962	0
ENSMUSG00000055013.16	Agap1	chr1	89725960	89726065	89743727	89743896	89766305	89766464	0.00566436	0	0.00402081	0.184561	0.896772	0
ENSMUSG00000055013.16	Agap1	chr1	89743836	89743896	89766305	89766464	89789162	89789324	0.138671	0.0526019	0.0234673	0.0149579	0.896772	0
ENSMUSG00000055013.16	Agap1	chr1	89789162	89789324	89823856	89823934	89834433	89834588	0.0495722	0.0162283	0.0147236	0.0207508	0.896772	0
ENSMUSG00000044337.5	Ackr3	chr1	90204005	90204087	90209587	90209870	90213794	90213833	0.0489011	0.0291727	0	0.0620322	0.896772	0
ENSMUSG00000034432.11	Cops8	chr1	90603527	90603627	90604374	90604445	90605463	90605512	0.000580373	0.00683203	0.00294516	0.903864	0.999593	0
ENSMUSG00000026303.6	Mlph	chr1	90915084	90915253	90921844	90921978	90927982	90928204	0.00203246	0.0065053	0.00445421	0.696729	0.973015	0
ENSMUSG00000026303.6	Mlph	chr1	90915084	90915253	90921844	90922043	90927982	90928204	0.107647	0.0810804	0.107589	0.311647	0.896772	0
ENSMUSG00000026303.6	Mlph	chr1	90930089	90930193	90931493	90931616	90933316	90933521	0.00217273	0.00703498	0.0125708	0.837488	0.999593	0
ENSMUSG00000026303.6	Mlph	chr1	90930089	90930193	90931496	90931616	90933316	90933521	0.0583333	0.075	0.0235702	0.282825	0.896772	0
ENSMUSG00000026303.6	Mlph	chr1	90931496	90931616	90933316	90933521	90935312	90935452	0.0414083	0.0313888	0.00320683	0.108533	0.896772	0
ENSMUSG00000026303.6	Mlph	chr1	90931496	90931616	90933326	90933521	90935312	90935452	5.55112e-17	0.247487	5.55112e-17	0.883109	0.999593	0
ENSMUSG00000026303.6	Mlph	chr1	90939719	90939875	90939973	90940096	90941687	90941780	0.00917341	0.00953968	0	0.194178	0.896772	0
ENSMUSG00000026303.6	Mlph	chr1	90941687	90941780	90942871	90942958	90945613	90945714	0.06125	0.153475	0.0494975	0.536459	0.940301	0
ENSMUSG00000026303.6	Mlph	chr1	90942871	90942958	90943694	90943749	90945613	90945714	0.00627479	0.0042126	0.0216078	0.718993	0.980777	0
ENSMUSG00000026303.6	Mlph	chr1	90942871	90942958	90945613	90945714	90948582	90951142	0.210428	0.0254713	0.136901	0.174549	0.896772	0
ENSMUSG00000026305.15	Lrrfip1	chr1	91053585	91053723	91068562	91068649	91105126	91105297	0.010101	0.0324314	0.00816285	0.643105	0.961156	0
ENSMUSG00000026305.15	Lrrfip1	chr1	91068562	91068649	91079030	91079081	91084945	91085005	0.0228052	0.0963191	0.0321577	0.673002	0.966799	0
ENSMUSG00000026305.15	Lrrfip1	chr1	91068562	91068649	91079030	91079081	91100576	91100581	0.0015903	0.00234096	0.00144584	0.391543	0.918824	0
ENSMUSG00000026305.15	Lrrfip1	chr1	91068562	91068649	91084945	91085005	91093559	91093637	0.0646296	0.158353	0.227016	0.776313	0.999526	0
ENSMUSG00000026305.15	Lrrfip1	chr1	91068562	91068649	91084945	91085005	91100576	91100581	0.00600771	0.00375316	0.00741565	0.376524	0.911934	0
ENSMUSG00000026305.15	Lrrfip1	chr1	91068562	91068649	91093559	91093637	91100576	91100581	0.00184219	0.00545533	0.00511487	0.718692	0.98074	0
ENSMUSG00000026305.15	Lrrfip1	chr1	91079030	91079081	91084945	91085005	91100576	91100581	0.0774411	0.0574851	0.151716	0.564606	0.945192	0
ENSMUSG00000026305.15	Lrrfip1	chr1	91084945	91085005	91091601	91091667	91093559	91093637	0.125	0.0927884	0.101015	0.249068	0.896772	0
ENSMUSG00000026305.15	Lrrfip1	chr1	91084945	91085005	91093559	91093637	91100576	91100581	0.0305402	0.0749492	0.0546069	0.639172	0.959738	0
ENSMUSG00000026305.15	Lrrfip1	chr1	91101184	91101310	91103246	91103318	91105126	91105297	0.020483	0.00238449	0.00911677	0.0794189	0.896772	0
ENSMUSG00000026305.15	Lrrfip1	chr1	91107297	91107390	91108579	91108672	91110354	91110447	0.0144434	0.023483	0.0143349	0.429303	0.930278	0
ENSMUSG00000026305.15	Lrrfip1	chr1	91107297	91107390	91108579	91108672	91112155	91112297	0.00102502	0.00390427	0.000236156	0.682462	0.969704	0
ENSMUSG00000026305.15	Lrrfip1	chr1	91107297	91107390	91110354	91110447	91112155	91112297	0.00353264	0.00696005	0.00618967	0.578966	0.946848	0
ENSMUSG00000026305.15	Lrrfip1	chr1	91108579	91108672	91110354	91110447	91112155	91112297	0.159899	0.0548771	0.0981408	0.112097	0.896772	0
ENSMUSG00000026305.15	Lrrfip1	chr1	91112155	91112297	91112652	91112714	91114595	91114852	0.00405551	0.0040089	0.00236896	0.215934	0.896772	0
ENSMUSG00000026305.15	Lrrfip1	chr1	91112155	91112297	91112652	91112814	91114595	91114852	0.000667766	0.000583445	0.00115708	0.5114	0.931723	0
ENSMUSG00000026305.15	Lrrfip1	chr1	91112155	91112297	91119866	91120020	91120140	91120190	0.218676	0.147019	0.0883586	0.0884654	0.896772	0
ENSMUSG00000026305.15	Lrrfip1	chr1	91112155	91112297	91120083	91120190	91122421	91122525	0.00289961	0.0171026	0.00234324	0.795906	0.999593	0
ENSMUSG00000026305.15	Lrrfip1	chr1	91112155	91112297	91120140	91120190	91122421	91122525	0.0386613	0.167052	0.0925442	0.721403	0.981416	0
ENSMUSG00000026305.15	Lrrfip1	chr1	91123077	91123157	91125640	91125745	91128085	91128178	0.0126938	0.0161044	0.0235425	0.54749	0.94303	0
ENSMUSG00000034353.14	Ramp1	chr1	91180045	91180140	91187294	91187392	91196770	91196885	0.0023315	0	0.00198794	0.238907	0.896772	0
ENSMUSG00000034343.14	Ube2f	chr1	91250364	91250437	91253759	91253827	91254214	91254393	0.0191518	0.0241106	0.0252538	0.442719	0.930278	0
ENSMUSG00000034343.14	Ube2f	chr1	91250364	91250437	91253759	91253827	91254259	91254393	0.0311089	0.0452798	0.0493643	0.519736	0.934498	0
ENSMUSG00000034343.14	Ube2f	chr1	91250364	91250437	91253759	91253827	91254262	91254393	0.0394802	0.189662	0.0270377	0.642861	0.961098	0
ENSMUSG00000034343.14	Ube2f	chr1	91250364	91250437	91254214	91254393	91262266	91262296	0.0959726	0.053506	0.0154931	0.0455975	0.896772	0
ENSMUSG00000034343.14	Ube2f	chr1	91250364	91250437	91254259	91254393	91262266	91262296	0.0363627	0.0233178	0.00715373	0.0672019	0.896772	0
ENSMUSG00000034343.14	Ube2f	chr1	91250364	91250437	91254262	91254393	91262266	91262296	0.104531	0.0923644	0.0361341	0.14695	0.896772	0
ENSMUSG00000034343.14	Ube2f	chr1	91254262	91254393	91262266	91262296	91265217	91265237	0.0214073	0.0317781	0.0120256	0.34605	0.902728	0
ENSMUSG00000034343.14	Ube2f	chr1	91262266	91262296	91265217	91265283	91275249	91275317	0.0134196	0.0134463	0	0.182332	0.896772	0
ENSMUSG00000034343.14	Ube2f	chr1	91278260	91278318	91279504	91279537	91283946	91284009	0.00817212	0	0.00270117	0.0507294	0.896772	0
ENSMUSG00000034343.14	Ube2f	chr1	91278260	91278318	91279504	91279537	91285304	91285391	0.0676329	0.0502044	0.0273278	0.116195	0.896772	0
ENSMUSG00000034343.14	Ube2f	chr1	91279504	91279537	91283946	91284009	91285304	91285391	0.0227344	0.0430878	0.0394764	0.576769	0.946848	0
ENSMUSG00000026307.12	Scly	chr1	91298367	91298448	91299403	91299469	91300527	91300640	0.009554	0.0661547	0.0308289	0.859088	0.999593	0
ENSMUSG00000026307.12	Scly	chr1	91308650	91308815	91309796	91309903	91315488	91315525	0.0539217	0.114514	0.0848023	0.587395	0.948071	0
ENSMUSG00000047443.14	Erfe	chr1	91370085	91370342	91370414	91370523	91370624	91370715	0.0864198	0.0213833	0.139675	0.470811	0.930278	0
ENSMUSG00000034292.13	Traf3ip1	chr1	91501004	91501424	91505422	91505494	91507492	91507568	0.0667643	0.108481	0.0300186	0.370506	0.910985	0
ENSMUSG00000026269.14	Rnpepl1	chr1	92915058	92915199	92915813	92915965	92916354	92916471	0.00867428	0.0155644	0.0208497	0.647185	0.962263	0
ENSMUSG00000026269.14	Rnpepl1	chr1	92915058	92915199	92915823	92915965	92916354	92916471	0.0187029	0.143291	0.2026	0.953622	0.999593	0
ENSMUSG00000026269.14	Rnpepl1	chr1	92916804	92916946	92917146	92917260	92917633	92917746	0.0324844	0.0568243	0.0148693	0.403475	0.922474	0
ENSMUSG00000084989.3	Crocc2	chr1	93181072	93181221	93183364	93183471	93184961	93185103	0	0	0.0340207	0.989532	0.999593	0
ENSMUSG00000047793.13	Sned1	chr1	93258965	93259106	93259644	93259779	93261648	93261774	0.0162037	0.0120281	0.0523783	0.699217	0.973939	0
ENSMUSG00000047793.13	Sned1	chr1	93258965	93259106	93259644	93259807	93261648	93261774	0.0118687	0.0590472	0.031427	0.774587	0.999322	0
ENSMUSG00000047793.13	Sned1	chr1	93283201	93283385	93283574	93283687	93284384	93284507	0.0357682	0.077973	0.0706423	0.625646	0.9553	0
ENSMUSG00000047793.13	Sned1	chr1	93283201	93283385	93283588	93283687	93284384	93284507	0	0	0.170103	0.929523	0.999593	0
ENSMUSG00000034107.10	Ano7	chr1	93375134	93375249	93377274	93377332	93380414	93380545	0.00471012	0.0193443	0.0175334	0.790641	0.999593	0
ENSMUSG00000034107.10	Ano7	chr1	93377274	93377332	93380414	93380545	93384810	93384918	0.0181742	0.0245203	0.0578097	0.715137	0.979172	0
ENSMUSG00000034107.10	Ano7	chr1	93377274	93377332	93380435	93380545	93384810	93384918	0	0.12145	0	0.952622	0.999593	0
ENSMUSG00000034107.10	Ano7	chr1	93377274	93377332	93380438	93380545	93384810	93384918	0.0833951	0.0426758	0.0673934	0.225597	0.896772	0
ENSMUSG00000034107.10	Ano7	chr1	93402136	93402227	93402640	93402760	93402949	93403570	0.0151709	0.016221	0	0.203993	0.896772	0
ENSMUSG00000116048.1	Septin2	chr1	93478992	93479068	93489127	93489154	93491156	93491277	0.12208	0.120024	0.0257849	0.173597	0.896772	0
ENSMUSG00000026280.17	Atg4b	chr1	93775132	93775234	93775627	93775700	93778284	93778288	0.0265139	0.00937155	0.0224098	0.229936	0.896772	0
ENSMUSG00000026280.17	Atg4b	chr1	93784411	93784490	93784628	93784667	93784752	93784898	0.0149101	0.0121975	0.0156224	0.326327	0.898978	0
ENSMUSG00000073609.9	D2hgdh	chr1	93829796	93829896	93832595	93832789	93835286	93835455	0.0301174	0.0720822	0.142412	0.822652	0.999593	0
ENSMUSG00000073609.9	D2hgdh	chr1	93829756	93829896	93835286	93835455	93837939	93838066	0.106061	0.198132	0.0857099	0.439672	0.930278	0
ENSMUSG00000094651.2	Gal3st2	chr1	93861345	93861619	93861778	93861957	93872454	93872541	0.031253	0.0514386	0.0695613	0.615973	0.952347	0
ENSMUSG00000094651.2	Gal3st2	chr1	93861345	93861619	93861778	93861957	93873589	93873610	1.11022e-16	0.182863	0	0.921673	0.999593	0
ENSMUSG00000094651.2	Gal3st2	chr1	93861345	93861619	93872454	93872541	93873589	93873610	0.0228497	0.0513683	0.0288402	0.550425	0.943411	0
ENSMUSG00000094651.2	Gal3st2	chr1	93861825	93861957	93872454	93872541	93873589	93873610	0.00117428	0.0496443	0.0167658	0.958041	0.999593	0
ENSMUSG00000101660.1	Gm18666	chr1	93911216	93911359	93914047	93914213	93916511	93916768	0.134105	0.254867	0.108374	0.415952	0.92604	0
ENSMUSG00000093805.7	Gal3st2b	chr1	93928036	93928062	93928221	93928400	93938604	93938691	5.55112e-17	0.103412	5.55112e-17	0.954273	0.999593	0
ENSMUSG00000093805.7	Gal3st2b	chr1	93928036	93928062	93928221	93928400	93939739	93939998	1.11022e-16	0.0294628	1.11022e-16	0.98902	0.999593	0
ENSMUSG00000093805.7	Gal3st2b	chr1	93928036	93928062	93938604	93938691	93939739	93939998	0	0.0556906	0	0.981499	0.999593	0
ENSMUSG00000093805.7	Gal3st2b	chr1	93928221	93928400	93938604	93938691	93939739	93939998	1.11022e-16	0.129301	1.11022e-16	0.955997	0.999593	0
ENSMUSG00000026333.14	Gin1	chr1	97770209	97770255	97775446	97775592	97777325	97777519	0.0322145	0.0512778	0.0386861	0.469295	0.930278	0
ENSMUSG00000026319.13	Relch	chr1	105691905	105692109	105692211	105692303	105692883	105693177	0.0294906	0.0842037	0.0512526	0.664347	0.965435	0
ENSMUSG00000026319.13	Relch	chr1	105719451	105719616	105721267	105721415	105725648	105725805	0.0731313	0.0770336	0.173185	0.640547	0.960452	0
ENSMUSG00000026319.13	Relch	chr1	105735922	105736022	105740434	105740517	105741012	105741095	0.135162	0.0845848	0.129921	0.276686	0.896772	0
ENSMUSG00000026319.13	Relch	chr1	105735922	105736022	105740434	105740517	105741296	105741360	0.163476	0.192643	0.0325107	0.243644	0.896772	0
ENSMUSG00000026319.13	Relch	chr1	105735922	105736022	105740434	105741095	105741296	105741360	0.177071	0.197605	0.0325107	0.221587	0.896772	0
ENSMUSG00000026319.13	Relch	chr1	105735922	105736022	105740434	105741360	105743210	105743349	0.0356383	0.0257332	0	0.0969014	0.896772	0
ENSMUSG00000026319.13	Relch	chr1	105735922	105736022	105741012	105741095	105741296	105741360	0.196741	0.219997	0.0325107	0.220459	0.896772	0
ENSMUSG00000026319.13	Relch	chr1	105735922	105736022	105741012	105741360	105743210	105743349	0.048136	0.0513649	0	0.206383	0.896772	0
ENSMUSG00000026319.13	Relch	chr1	105735922	105736022	105741296	105741360	105743210	105743349	0	0.0169978	0	0.994302	0.999593	0
ENSMUSG00000026319.13	Relch	chr1	105740434	105740517	105741012	105741095	105741296	105741360	0.147062	0.0548229	0.106999	0.17402	0.896772	0
ENSMUSG00000026319.13	Relch	chr1	105746068	105746185	105747354	105747481	105750321	105750410	0.0382976	0.0320012	0	0.128528	0.896772	0
ENSMUSG00000026319.13	Relch	chr1	105750321	105750410	105750972	105751043	105753502	105753525	0.0214139	0.0383454	0.0127073	0.421015	0.927519	0
ENSMUSG00000038866.15	Zcchc2	chr1	106004136	106004176	106006014	106006086	106011701	106011814	0.00620258	0.0127913	0.0247751	0.764827	0.99553	0
ENSMUSG00000038866.15	Zcchc2	chr1	106015998	106016093	106016586	106016687	106018218	106018302	0.00203649	0.0139682	0.014285	0.881582	0.999593	0
ENSMUSG00000038866.15	Zcchc2	chr1	106015998	106016093	106018218	106018302	106019847	106019905	0.145677	0.0646281	0.0450149	0.0315293	0.896772	0
ENSMUSG00000038866.15	Zcchc2	chr1	106019847	106019905	106021725	106021858	106023199	106023258	0.0329689	0.029084	0.0235702	0.223979	0.896772	0
ENSMUSG00000038866.15	Zcchc2	chr1	106023663	106023758	106027387	106027531	106029751	106031233	0.098609	0.07142	0.110947	0.343183	0.902005	0
ENSMUSG00000038866.15	Zcchc2	chr1	106023663	106023758	106027402	106027531	106029751	106031233	0.098609	0.07142	0.110947	0.343183	0.902005	0
ENSMUSG00000067006.12	Serpinb5	chr1	106861202	106861260	106869478	106869608	106870281	106870450	0.00285178	0.0191841	0.00399904	0.805021	0.999593	0
ENSMUSG00000067006.12	Serpinb5	chr1	106861202	106861260	106870281	106870450	106872249	106872387	0.018195	0.0148284	0.0129966	0.212597	0.896772	0
ENSMUSG00000026377.12	Nifk	chr1	118329352	118329564	118330605	118330662	118332343	118332478	0.00658227	0.00694049	0.0184262	0.668068	0.966186	0
ENSMUSG00000064302.13	Clasp1	chr1	118389516	118389521	118389806	118389957	118419439	118419918	0.0138454	0.0143603	0.00860232	0.235355	0.896772	0
ENSMUSG00000064302.13	Clasp1	chr1	118419723	118419918	118459800	118459879	118461186	118461290	0.0160743	0.00211226	0.0119215	0.195253	0.896772	0
ENSMUSG00000064302.13	Clasp1	chr1	118461186	118461290	118462465	118462557	118464527	118464603	0.000277094	0.00724707	0.00417979	0.960358	0.999593	0
ENSMUSG00000064302.13	Clasp1	chr1	118505481	118505541	118506939	118507017	118508814	118508982	0.0479329	0.141824	0.00796179	0.5771	0.946848	0
ENSMUSG00000064302.13	Clasp1	chr1	118508814	118508982	118509513	118509621	118510205	118510376	0	0.0558242	0	0.9815	0.999593	0
ENSMUSG00000064302.13	Clasp1	chr1	118510236	118510376	118512174	118512222	118521826	118521934	0.00602024	0.0332887	0.0172741	0.813841	0.999593	0
ENSMUSG00000064302.13	Clasp1	chr1	118521826	118521934	118523320	118523347	118525296	118525455	0.0179799	0.00782553	0.0161337	0.251619	0.896772	0
ENSMUSG00000064302.13	Clasp1	chr1	118525296	118525455	118536134	118536197	118539265	118539369	0.00131081	0.00470666	0.00569673	0.801904	0.999593	0
ENSMUSG00000064302.13	Clasp1	chr1	118539265	118539369	118541674	118541698	118543101	118543346	0.022353	0.0141341	0.00771229	0.0752339	0.896772	0
ENSMUSG00000064302.13	Clasp1	chr1	118539265	118539369	118541674	118541698	118543104	118543346	0.0276375	0.0205155	0.0464294	0.493446	0.930962	0
ENSMUSG00000064302.13	Clasp1	chr1	118545392	118545456	118546880	118546949	118547655	118547658	0.0131697	0.00921304	0.0114619	0.250395	0.896772	0
ENSMUSG00000064302.13	Clasp1	chr1	118545392	118545456	118547655	118547658	118547864	118548028	0.0113776	0.0177714	0.0146478	0.471556	0.930278	0
ENSMUSG00000026380.10	Tfcp2l1	chr1	118627945	118628102	118632241	118632393	118652300	118652377	0.00295407	0.0120076	0.0096205	0.773162	0.998843	0
ENSMUSG00000026380.10	Tfcp2l1	chr1	118632241	118632393	118637598	118637751	118652300	118652377	0.0178509	0.0213854	0	0.242491	0.896772	0
ENSMUSG00000026380.10	Tfcp2l1	chr1	118653715	118653822	118656347	118656520	118659007	118659118	0	0.230387	0	0.897891	0.999593	0
ENSMUSG00000026380.10	Tfcp2l1	chr1	118653715	118653822	118656367	118656520	118659007	118659118	0.00183549	0.023867	0.0443828	0.968246	0.999593	0
ENSMUSG00000026387.15	Sctr	chr1	120031563	120031671	120031961	120032028	120036334	120036438	0.0169082	0.0376533	0.00683195	0.502813	0.930962	0
ENSMUSG00000026342.10	Slc35f5	chr1	125562499	125562641	125566467	125566611	125568546	125568573	0.01586	0	0.011723	0.195975	0.896772	0
ENSMUSG00000026342.10	Slc35f5	chr1	125570546	125570628	125571369	125571514	125572312	125572503	0.0207808	0.0247798	0.0080353	0.251723	0.896772	0
ENSMUSG00000026342.10	Slc35f5	chr1	125585073	125585233	125587364	125587455	125589810	125589965	0.00984232	0.0271135	0.0387193	0.778824	0.999593	0
ENSMUSG00000026342.10	Slc35f5	chr1	125585073	125585233	125589810	125589965	125591032	125591129	0.0236823	0.206489	0.0191382	0.786549	0.999593	0
ENSMUSG00000026349.14	Ccnt2	chr1	127793357	127793418	127795254	127795317	127797840	127797886	0.0266109	0.0219932	0.0335373	0.390068	0.918267	0
ENSMUSG00000026349.14	Ccnt2	chr1	127795254	127795317	127797632	127797719	127797840	127797886	0.061168	0.0569402	0.054653	0.279432	0.896772	0
ENSMUSG00000026349.14	Ccnt2	chr1	127795254	127795317	127797840	127797886	127799389	127799553	0.0753133	0.160833	0.0248108	0.471785	0.930278	0
ENSMUSG00000026349.14	Ccnt2	chr1	127795254	127795317	127797840	127798196	127799389	127799553	0.0327932	0.0781828	0.0174594	0.522001	0.934498	0
ENSMUSG00000026349.14	Ccnt2	chr1	127799389	127799553	127801605	127801676	127802161	127803293	0.0309518	0.0495769	0.0335294	0.44994	0.930278	0
ENSMUSG00000036104.12	Rab3gap1	chr1	127891017	127891096	127901578	127901698	127903671	127903837	0.00408101	0.0210084	0.0571399	0.918965	0.999593	0
ENSMUSG00000036104.12	Rab3gap1	chr1	127915638	127915720	127918220	127918289	127919567	127919641	0.00679989	0.00202453	0.00291891	0.0578854	0.896772	0
ENSMUSG00000036104.12	Rab3gap1	chr1	127919567	127919641	127924190	127924365	127924727	127924820	0.0106025	0.00435541	0.00617618	0.11629	0.896772	0
ENSMUSG00000036104.12	Rab3gap1	chr1	127927948	127928121	127930389	127930444	127930706	127931078	0.00406362	0.00786271	0.0217	0.815664	0.999593	0
ENSMUSG00000036104.12	Rab3gap1	chr1	127927948	127928121	127930394	127930444	127930706	127931078	0.109424	0.0812264	0.163125	0.448842	0.930278	0
ENSMUSG00000056211.13	R3hdm1	chr1	128153188	128153399	128162201	128162243	128162768	128162858	0.469646	0.0868051	0.139875	0.0115182	0.896772	0
ENSMUSG00000056211.13	R3hdm1	chr1	128153188	128153399	128162768	128162858	128167892	128168007	0.0565062	0.0182219	0.00938112	0.00647398	0.896772	0
ENSMUSG00000056211.13	R3hdm1	chr1	128168978	128169057	128174948	128175008	128175091	128175232	0.00434028	0.0240563	0.0257799	0.858948	0.999593	0
ENSMUSG00000056211.13	R3hdm1	chr1	128175091	128175232	128176823	128176956	128178882	128178991	0.0350869	0.0479978	0.0266848	0.340972	0.901782	0
ENSMUSG00000056211.13	R3hdm1	chr1	128181985	128182164	128184399	128184654	128186757	128186909	0.18959	0.159067	0.115202	0.182809	0.896772	0
ENSMUSG00000056211.13	R3hdm1	chr1	128181985	128182212	128184399	128184654	128186757	128186909	0.0962086	0.0681246	0.0229118	0.0901046	0.896772	0
ENSMUSG00000056211.13	R3hdm1	chr1	128186757	128186909	128190637	128190739	128193459	128193500	0.0210494	0.0655278	0.0836786	0.769305	0.997559	0
ENSMUSG00000056211.13	R3hdm1	chr1	128193459	128193756	128196151	128196200	128196973	128197097	0.0106602	0.0111565	0	0.196213	0.896772	0
ENSMUSG00000026353.9	Ubxn4	chr1	128252202	128252305	128256154	128256237	128258831	128259003	0.119444	0.0988812	0	0.132545	0.896772	0
ENSMUSG00000026353.9	Ubxn4	chr1	128258831	128259003	128259443	128259537	128260830	128260888	0.0020339	0.0195712	0.0188562	0.913168	0.999593	0
ENSMUSG00000026353.9	Ubxn4	chr1	128258831	128259003	128259443	128259537	128260833	128260888	0.00184966	0.00182629	0.00544455	0.684175	0.971143	0
ENSMUSG00000026353.9	Ubxn4	chr1	128260833	128260888	128261050	128261135	128262792	128262957	0.00192138	0.00276657	0	0.315101	0.896772	0
ENSMUSG00000026353.9	Ubxn4	chr1	128269868	128269971	128272820	128272952	128274801	128275004	0.028239	0.0279017	0.0205708	0.249558	0.896772	0
ENSMUSG00000026353.9	Ubxn4	chr1	128269868	128269971	128274801	128275004	128276956	128277020	0.0890789	0.0658932	0.0459212	0.140346	0.896772	0
ENSMUSG00000042510.7	AA986860	chr1	130732109	130732223	130737501	130737687	130741002	130741183	8.37446e-05	0.0488292	0.0399805	0.997278	0.999593	0
ENSMUSG00000042510.7	AA986860	chr1	130732109	130732223	130741002	130741183	130742328	130742463	0.0125154	0.0738117	0.0523783	0.826692	0.999593	0
ENSMUSG00000026427.16	Eif2d	chr1	131154228	131154419	131155167	131155251	131155632	131155723	0.00900032	0.00907179	0	0.18424	0.896772	0
ENSMUSG00000026427.16	Eif2d	chr1	131163519	131163565	131164402	131164506	131164619	131164769	0.0915072	0.17109	0.0635058	0.437292	0.930278	0
ENSMUSG00000026427.16	Eif2d	chr1	131163519	131163565	131164402	131164769	131165119	131165209	0.0780177	0.0511019	0.0475665	0.144178	0.896772	0
ENSMUSG00000026427.16	Eif2d	chr1	131163519	131163565	131164619	131164769	131165119	131165209	0.0510417	0.108748	0.0412479	0.478656	0.930278	0
ENSMUSG00000026427.16	Eif2d	chr1	131164402	131164506	131164619	131164769	131165119	131165209	0.00422931	0.0184064	0.0151535	0.789898	0.999593	0
ENSMUSG00000004552.16	Ctse	chr1	131668036	131668236	131670685	131670808	131672203	131672345	0.00158079	0	0.00111828	0.183625	0.896772	0
ENSMUSG00000004552.16	Ctse	chr1	131672241	131672345	131672444	131672543	131674780	131674880	0.000724848	0.000581149	8.57485e-05	0.117995	0.896772	0
ENSMUSG00000042268.10	Slc26a9	chr1	131744037	131744113	131750298	131750415	131750579	131750722	0.0135364	0.0608934	0.0519097	0.808631	0.999593	0
ENSMUSG00000042268.10	Slc26a9	chr1	131744037	131744314	131750298	131750415	131750579	131750722	0.0616069	0.190294	0.11748	0.628505	0.956416	0
ENSMUSG00000042268.10	Slc26a9	chr1	131750579	131750722	131751848	131752685	131752843	131752983	0.00194808	0.00819322	0.00872971	0.813528	0.999593	0
ENSMUSG00000042268.10	Slc26a9	chr1	131750579	131750722	131751933	131752685	131752843	131752983	0.0257127	0.0079845	0.0173296	0.158572	0.896772	0
ENSMUSG00000042268.10	Slc26a9	chr1	131753826	131754002	131755371	131755536	131756104	131756341	0.0708695	0.0684049	0.0917933	0.410432	0.92256	0
ENSMUSG00000042268.10	Slc26a9	chr1	131753826	131754002	131755371	131755536	131756188	131756341	0.00586359	0.00825076	0.0595682	0.918294	0.999593	0
ENSMUSG00000042268.10	Slc26a9	chr1	131753826	131754002	131755371	131755536	131756256	131756341	0.0777778	0.057735	0.0628539	0.228487	0.896772	0
ENSMUSG00000042268.10	Slc26a9	chr1	131756636	131756719	131757387	131757535	131758470	131758584	0.019862	0.0333937	0.0744323	0.740822	0.986968	0
ENSMUSG00000042268.10	Slc26a9	chr1	131757387	131757535	131758222	131758383	131758470	131758584	0.0457317	0.0547933	0	0.240331	0.896772	0
ENSMUSG00000042268.10	Slc26a9	chr1	131758470	131758584	131758758	131758836	131759397	131759479	0.0101447	0.0246995	0.023919	0.668607	0.966412	0
ENSMUSG00000042268.10	Slc26a9	chr1	131765883	131766026	131767808	131767880	131769200	131771504	0.00856392	0.024845	0.00817464	0.607243	0.950711	0
ENSMUSG00000026434.12	Nucks1	chr1	131928066	131928216	131929612	131929762	131931033	131932679	0.00845579	0.00844903	0.00875329	0.342064	0.901782	0
ENSMUSG00000026434.12	Nucks1	chr1	131928066	131928216	131929615	131929762	131931033	131932679	0.011907	0.0131216	0.012371	0.357554	0.906388	0
ENSMUSG00000026436.15	Elk4	chr1	132019349	132019466	132023552	132023838	132031563	132031694	0.134615	0.181423	0.0543928	0.288023	0.896772	0
ENSMUSG00000079330.9	Lemd1	chr1	132228913	132229036	132232266	132232337	132256696	132257009	0.02435	0.0796035	0.0401187	0.692728	0.972383	0
ENSMUSG00000079330.9	Lemd1	chr1	132228913	132229036	132255354	132255494	132256696	132257009	0.00838077	0.0279363	0.0346621	0.792496	0.999593	0
ENSMUSG00000079330.9	Lemd1	chr1	132228913	132229036	132255420	132255494	132256696	132257009	0.0652778	0	0.0605084	0.261711	0.896772	0
ENSMUSG00000079330.9	Lemd1	chr1	132232266	132232337	132255420	132255494	132256696	132257009	0.0724747	0.0537985	0.0972953	0.409091	0.922474	0
ENSMUSG00000042046.15	Dstyk	chr1	132417603	132417870	132429433	132429576	132434098	132434148	0.0433391	0	0.0318139	0.193274	0.896772	0
ENSMUSG00000042046.15	Dstyk	chr1	132459875	132459990	132462912	132463047	132463323	132464092	0.041939	0	0.0412579	0.289006	0.896772	0
ENSMUSG00000026439.14	Rbbp5	chr1	132484801	132484918	132489587	132489728	132490422	132490501	0.050365	0.0624091	0.0168359	0.259411	0.896772	0
ENSMUSG00000026439.14	Rbbp5	chr1	132490478	132490585	132492552	132492662	132493814	132493934	0.0226103	0.00965022	0.00726704	0.0315338	0.896772	0
ENSMUSG00000026439.14	Rbbp5	chr1	132490478	132490585	132492599	132492662	132493814	132493934	0.19248	0.14288	0.08803	0.115157	0.896772	0
ENSMUSG00000026447.17	Pik3c2b	chr1	133066211	133067229	133070317	133070418	133071173	133071328	0.028126	0.026382	0.0714249	0.633146	0.958052	0
ENSMUSG00000026447.17	Pik3c2b	chr1	133070317	133070418	133071173	133071328	133071601	133071722	0.0152094	0.0432225	0.050321	0.741388	0.98719	0
ENSMUSG00000041757.17	Plekha6	chr1	133164209	133164540	133170012	133170089	133173748	133173806	0.013859	0	0.00986947	0.185458	0.896772	0
ENSMUSG00000041757.17	Plekha6	chr1	133173748	133173806	133256839	133257038	133259008	133259089	0.000701363	0.00528064	0.00331975	0.863836	0.999593	0
ENSMUSG00000041757.17	Plekha6	chr1	133204577	133204777	133255573	133257038	133259008	133259089	0.0781181	0.160658	0.063129	0.513593	0.931813	0
ENSMUSG00000041757.17	Plekha6	chr1	133246105	133246142	133247532	133247679	133259008	133259089	0.0218599	0.0266257	0	0.248211	0.896772	0
ENSMUSG00000041757.17	Plekha6	chr1	133264660	133264733	133266565	133266666	133269999	133270202	0.0542259	0.0301904	0.0168282	0.051855	0.896772	0
ENSMUSG00000041757.17	Plekha6	chr1	133272216	133272691	133273414	133273529	133273857	133274374	0.00158673	0.00661149	0.00727336	0.815985	0.999593	0
ENSMUSG00000041757.17	Plekha6	chr1	133274253	133274374	133274792	133274879	133280338	133280407	0.0641264	0.0303047	0.0407664	0.138436	0.896772	0
ENSMUSG00000041757.17	Plekha6	chr1	133274253	133274374	133274792	133274879	133281782	133281811	0.0901963	0.0258634	0.0220222	0.0110518	0.896772	0
ENSMUSG00000041757.17	Plekha6	chr1	133274253	133274374	133274792	133275865	133280338	133280407	0.00176448	0.0187773	0.0306498	0.954533	0.999593	0
ENSMUSG00000041757.17	Plekha6	chr1	133274253	133274374	133274792	133275865	133281782	133281811	0.0668051	0.0185577	0.109629	0.485976	0.930962	0
ENSMUSG00000041757.17	Plekha6	chr1	133274253	133274374	133280338	133280407	133281782	133281811	0.0271715	0.0433038	0.0770842	0.695249	0.972935	0
ENSMUSG00000041757.17	Plekha6	chr1	133274253	133274374	133281782	133281863	133282116	133282266	0.0598209	0.0150885	0.0796789	0.400184	0.922474	0
ENSMUSG00000041757.17	Plekha6	chr1	133274792	133274879	133275811	133275865	133280338	133280407	0.0189891	0.0307242	0.0308688	0.535005	0.940089	0
ENSMUSG00000041757.17	Plekha6	chr1	133274792	133274879	133275811	133275865	133281782	133281811	0.370384	0.119409	0.299315	0.167269	0.896772	0
ENSMUSG00000041757.17	Plekha6	chr1	133274792	133274879	133280338	133280407	133281782	133281811	0.0761317	0.0330396	0.0117987	0.0228514	0.896772	0
ENSMUSG00000041757.17	Plekha6	chr1	133274792	133274879	133280338	133280458	133281782	133281811	0	0.11134	0	0.935888	0.999593	0
ENSMUSG00000041757.17	Plekha6	chr1	133275811	133275865	133279372	133279453	133280338	133280407	0.0273438	0.00676582	0.0220971	0.213127	0.896772	0
ENSMUSG00000041757.17	Plekha6	chr1	133275811	133275865	133280338	133280407	133281782	133281811	0.233333	0.057735	0.288033	0.377409	0.9123	0
ENSMUSG00000041757.17	Plekha6	chr1	133280338	133280407	133281782	133281863	133282116	133282266	0.00405501	0.0179141	0.00575673	0.731197	0.984646	0
ENSMUSG00000041757.17	Plekha6	chr1	133285249	133285386	133286246	133286396	133287469	133287599	0.0101039	0.0096191	0.0228726	0.607322	0.950711	0
ENSMUSG00000041757.17	Plekha6	chr1	133287773	133287880	133292330	133292528	133293705	133293873	2.77556e-17	0.147196	0	0.923022	0.999593	0
ENSMUSG00000041757.17	Plekha6	chr1	133287773	133287880	133292351	133292528	133293705	133293873	0.0123996	0.00723271	0.00415945	0.0609386	0.896772	0
ENSMUSG00000041757.17	Plekha6	chr1	133293966	133294087	133294562	133294708	133298919	133299043	0.018346	0.046634	0.0112637	0.549409	0.943134	0
ENSMUSG00000041757.17	Plekha6	chr1	133294562	133294708	133298919	133299043	133299708	133299796	0.000439527	0.0281213	0.0328887	0.990424	0.999593	0
ENSMUSG00000041757.17	Plekha6	chr1	133294562	133294708	133298924	133299043	133299708	133299796	0	0.185842	0	0.917174	0.999593	0
ENSMUSG00000026456.18	Cyb5r1	chr1	134406019	134406053	134406408	134406462	134406598	134406671	0.0277778	0.0206197	0.0224478	0.235466	0.896772	0
ENSMUSG00000026456.18	Cyb5r1	chr1	134406312	134406462	134406598	134406671	134407045	134407152	0.0156974	0.020506	0.00523783	0.281657	0.896772	0
ENSMUSG00000026456.18	Cyb5r1	chr1	134407573	134407703	134407816	134408245	134408403	134408487	0.0114875	0.0540434	0.0621475	0.846079	0.999593	0
ENSMUSG00000026456.18	Cyb5r1	chr1	134407573	134407703	134407816	134408257	134408403	134408487	0.0106398	0.0893563	0.0449898	0.903834	0.999593	0
ENSMUSG00000026457.14	Adipor1	chr1	134415563	134415585	134415919	134415989	134422920	134423155	0.000310495	0.00987831	0.00114309	0.954189	0.999593	0
ENSMUSG00000026457.14	Adipor1	chr1	134428163	134428269	134431056	134431250	134431529	134433348	0.00737935	0.0117575	0.00785674	0.438364	0.930278	0
ENSMUSG00000026455.14	Klhl12	chr1	134475787	134475902	134483746	134483853	134485717	134485913	0.00560897	0.0541266	0.0362619	0.888573	0.999593	0
ENSMUSG00000042207.17	Kdm5b	chr1	134599059	134599218	134600633	134600753	134602449	134602608	0.00150638	0.00821241	0.00868948	0.85566	0.999593	0
ENSMUSG00000042207.17	Kdm5b	chr1	134624710	134625196	134627264	134627376	134628597	134628752	0.00563403	0.0343297	0.0269063	0.848991	0.999593	0
ENSMUSG00000026429.9	Ube2t	chr1	134971278	134971355	134971900	134971999	134972105	134972189	0.145833	0.108253	0.117851	0.224242	0.896772	0
ENSMUSG00000026426.10	Arl8a	chr1	135146957	135147100	135151402	135151510	135152470	135152551	0.0015203	0.00865067	0.00759587	0.843783	0.999593	0
ENSMUSG00000026421.14	Csrp1	chr1	135720060	135720193	135729141	135729274	135739399	135739512	0.0576132	0.107627	0.0465585	0.46955	0.930278	0
ENSMUSG00000026421.14	Csrp1	chr1	135729146	135729274	135729905	135739512	135745258	135745427	0.117222	0.12313	0.0525151	0.222778	0.896772	0
ENSMUSG00000026421.14	Csrp1	chr1	135729146	135729274	135739399	135739512	135745258	135745427	0.00268842	0.00919773	0.00509907	0.691852	0.972076	0
ENSMUSG00000026421.14	Csrp1	chr1	135745258	135745427	135746322	135746421	135746719	135746849	0.00065572	0.0019966	0.000702889	0.629402	0.956449	0
ENSMUSG00000026421.14	Csrp1	chr1	135745258	135745427	135746719	135746849	135750564	135750658	0.00107454	0.00205707	0.00211701	0.602676	0.950077	0
ENSMUSG00000041782.14	Lad1	chr1	135818597	135819016	135825624	135825892	135827163	135827181	0.205375	0.0573409	0.132396	0.166044	0.896772	0
ENSMUSG00000041782.14	Lad1	chr1	135818597	135819016	135825754	135825892	135827163	135827175	0.00606327	0.00152328	0.0037738	0.140669	0.896772	0
ENSMUSG00000041782.14	Lad1	chr1	135828015	135828046	135828714	135828819	135829688	135829732	0.00211228	0.00524191	0.00209309	0.562341	0.944677	0
ENSMUSG00000041782.14	Lad1	chr1	135829688	135829732	135829957	135830167	135830899	135830972	0.000880013	0.00286204	0.00172484	0.685224	0.97121	0
ENSMUSG00000041782.14	Lad1	chr1	135830899	135830972	135831082	135831220	135831524	135831611	0.0093335	0.0169848	0.00670561	0.436651	0.930278	0
ENSMUSG00000041782.14	Lad1	chr1	135830899	135830972	135831089	135831220	135831524	135831611	0.194444	0.144338	0.41574	0.644854	0.961783	0
ENSMUSG00000026414.13	Tnnt2	chr1	135836401	135836446	135838147	135838179	135840860	135840912	0.0457516	0.0196078	0.0369729	0.206505	0.896772	0
ENSMUSG00000026414.13	Tnnt2	chr1	135841900	135841911	135842014	135842026	135843784	135843814	0.0445546	0.0760918	0.0729183	0.539571	0.940877	0
ENSMUSG00000026414.13	Tnnt2	chr1	135841900	135841911	135842014	135842026	135845554	135845644	0.363625	0.181618	0.156325	0.0663089	0.896772	0
ENSMUSG00000026414.13	Tnnt2	chr1	135841900	135841911	135843784	135843814	135845554	135845644	0.476855	0.248181	0.073973	0.0638847	0.896772	0
ENSMUSG00000026414.13	Tnnt2	chr1	135842014	135842026	135843784	135843814	135845554	135845644	0.0101042	0.192941	0.0367785	0.863718	0.999593	0
ENSMUSG00000026414.13	Tnnt2	chr1	135845897	135845933	135846721	135846755	135847708	135847772	0.0205767	0.0124794	0.0227965	0.33362	0.900193	0
ENSMUSG00000026414.13	Tnnt2	chr1	135845897	135845933	135846721	135846755	135847711	135847772	0.0601733	0.0972055	0.0136639	0.364939	0.910296	0
ENSMUSG00000026414.13	Tnnt2	chr1	135845897	135845933	135846721	135846979	135847708	135847772	0.310363	0.218258	0.315025	0.322305	0.897673	0
ENSMUSG00000026414.13	Tnnt2	chr1	135845897	135845933	135846724	135846755	135847708	135847772	0.0869426	0.0645382	0.233569	0.689073	0.971503	0
ENSMUSG00000026414.13	Tnnt2	chr1	135845897	135845933	135846724	135846755	135847711	135847772	1.11022e-16	0	0.0544331	0.985922	0.999593	0
ENSMUSG00000026414.13	Tnnt2	chr1	135845897	135845933	135847708	135847772	135847980	135848049	0	0	0.341824	0.898691	0.999593	0
ENSMUSG00000026414.13	Tnnt2	chr1	135847980	135848097	135848788	135848888	135849349	135849459	0.247917	0.245188	0	0.145704	0.896772	0
ENSMUSG00000026414.13	Tnnt2	chr1	135847980	135848097	135848810	135848888	135849349	135849459	0.00759359	0.0203006	0.00596134	0.574884	0.946848	0
ENSMUSG00000026414.13	Tnnt2	chr1	135849349	135849460	135850378	135850387	135850710	135850820	0.00256759	0	0.00274286	0.316379	0.896977	0
ENSMUSG00000026414.13	Tnnt2	chr1	135849349	135849460	135850426	135850504	135850710	135850820	0.00668838	0.00581225	0.00728651	0.343875	0.902056	0
ENSMUSG00000026411.17	Tmem9	chr1	136019657	136019749	136024617	136024726	136027396	136027528	0.00627885	0.00709876	0	0.223252	0.896772	0
ENSMUSG00000041642.18	Kif21b	chr1	136152196	136152415	136152754	136152839	136153192	136153310	0.000793651	0.0096225	0.00673435	0.916804	0.999593	0
ENSMUSG00000041642.18	Kif21b	chr1	136152196	136152415	136152757	136152839	136153192	136153310	0.000658406	0.00593168	0.00391207	0.886261	0.999593	0
ENSMUSG00000041642.18	Kif21b	chr1	136161405	136161571	136161728	136161780	136161963	136162021	0.0853803	0.0863834	0.0502104	0.226814	0.896772	0
ENSMUSG00000041642.18	Kif21b	chr1	136165017	136165131	136167161	136167200	136169186	136169323	0.0145645	0.0625295	0.165204	0.86812	0.999593	0
ENSMUSG00000041642.18	Kif21b	chr1	136172802	136173002	136173471	136173651	136174036	136174205	0.00184493	0.00460652	0.00637033	0.745842	0.988906	0
ENSMUSG00000056268.15	Dennd1b	chr1	139054540	139054621	139059066	139059126	139060274	139060328	0.0200783	0.0647095	0.121157	0.817916	0.999593	0
ENSMUSG00000056268.15	Dennd1b	chr1	139081172	139081273	139085882	139085928	139090453	139090555	0.0298173	0.0498754	0.0200598	0.400193	0.922474	0
ENSMUSG00000056268.15	Dennd1b	chr1	139081172	139081273	139090453	139090555	139101967	139102093	5.55112e-17	0.282843	5.55112e-17	0.871133	0.999593	0
ENSMUSG00000056268.15	Dennd1b	chr1	139090453	139090555	139092554	139093980	139101967	139102093	0.00742764	0.011703	0.0200598	0.671919	0.966548	0
ENSMUSG00000056268.15	Dennd1b	chr1	139133670	139133761	139139380	139139421	139140451	139140520	0.0128095	0.00901437	0.00997678	0.218476	0.896772	0
ENSMUSG00000033964.12	Zbtb41	chr1	139423653	139424267	139429125	139429158	139429228	139429333	0.0128502	0.169179	0.167916	0.937281	0.999593	0
ENSMUSG00000033964.12	Zbtb41	chr1	139441762	139441868	139442808	139442897	139446874	139449183	0.0246416	0.00921304	0.0226616	0.259831	0.896772	0
ENSMUSG00000052726.16	Kcnt2	chr1	140450195	140450304	140484124	140484233	140507699	140507849	0.0534722	0.0396928	0.0432121	0.229148	0.896772	0
ENSMUSG00000052726.16	Kcnt2	chr1	140552959	140553071	140570381	140570483	140573594	140573678	0	0.0385283	0	0.981993	0.999593	0
ENSMUSG00000052726.16	Kcnt2	chr1	140574728	140574857	140578454	140578475	140584018	140584319	0	0.0785674	0	0.96085	0.999593	0
ENSMUSG00000018189.12	Uchl5	chr1	143786129	143786235	143794276	143794402	143794482	143794544	0.00950957	0.00479291	0.0170911	0.515398	0.932727	0
ENSMUSG00000018189.12	Uchl5	chr1	143802134	143802233	143802927	143803077	143806683	143806941	0.0374529	0.0092021	0.0140417	0.0441621	0.896772	0
ENSMUSG00000032487.8	Ptgs2	chr1	150100030	150100275	150100973	150101090	150101212	150101326	0.00388292	0.0160375	0.0076033	0.730832	0.984498	0
ENSMUSG00000006005.18	Tpr	chr1	150395198	150395303	150398599	150398673	150402254	150402351	0.00615225	0.00454788	0.00347779	0.149253	0.896772	0
ENSMUSG00000006005.18	Tpr	chr1	150406461	150406554	150407328	150407409	150407489	150407577	0.00636123	0.0130116	0.0141444	0.637692	0.959303	0
ENSMUSG00000006005.18	Tpr	chr1	150414787	150414814	150416068	150416231	150417381	150417516	0.00307094	0.0172744	0.00509539	0.783945	0.999593	0
ENSMUSG00000006005.18	Tpr	chr1	150446123	150446241	150447511	150447630	150449142	150449238	0.000735363	0.0345155	0.0201024	0.983613	0.999593	0
ENSMUSG00000023150.14	Ivns1abp	chr1	151349375	151349603	151350980	151351109	151351553	151351723	0.00426637	0.000646288	0.0034451	0.219925	0.896772	0
ENSMUSG00000023150.14	Ivns1abp	chr1	151353919	151354093	151354633	151354693	151356128	151356236	0	0	0.0821552	0.975674	0.999593	0
ENSMUSG00000023150.14	Ivns1abp	chr1	151353919	151354093	151354633	151354759	151356128	151356236	0.00324989	0.00527723	0.00520079	0.53102	0.938396	0
ENSMUSG00000023150.14	Ivns1abp	chr1	151354633	151354759	151355166	151355276	151356128	151356236	0.00205462	0.00416105	0.00463297	0.63923	0.959738	0
ENSMUSG00000023150.14	Ivns1abp	chr1	151354633	151354759	151355166	151355311	151355849	151356236	0.0552832	0.130563	0.0446756	0.522639	0.93454	0
ENSMUSG00000023150.14	Ivns1abp	chr1	151354633	151354759	151355166	151355311	151356128	151356236	0.0157677	0.0249955	0.023377	0.510742	0.931723	0
ENSMUSG00000023150.14	Ivns1abp	chr1	151354633	151354759	151355166	151356236	151359621	151359751	0.00279015	0.00708495	0.0050871	0.630021	0.956821	0
ENSMUSG00000023150.14	Ivns1abp	chr1	151354633	151354759	151355166	151356257	151359621	151359751	0.00189394	0.0583231	0.0642824	0.977651	0.999593	0
ENSMUSG00000023150.14	Ivns1abp	chr1	151354633	151354759	151356128	151356236	151359621	151359751	0.00312925	0.00695271	0.00270404	0.518251	0.934263	0
ENSMUSG00000023150.14	Ivns1abp	chr1	151355166	151355311	151355849	151355910	151356128	151356236	0.0425725	0.0425917	0	0.181823	0.896772	0
ENSMUSG00000023150.14	Ivns1abp	chr1	151355166	151355311	151355849	151356041	151356128	151356236	0.00967937	0.182321	0.162553	0.937762	0.999593	0
ENSMUSG00000023150.14	Ivns1abp	chr1	151355166	151355311	151355849	151356236	151359621	151359751	0.0400997	0.076976	0.10334	0.661925	0.964823	0
ENSMUSG00000023150.14	Ivns1abp	chr1	151355166	151355311	151356128	151356236	151359621	151359751	0.0171522	0.07244	0.0281592	0.716151	0.979535	0
ENSMUSG00000023150.14	Ivns1abp	chr1	151356128	151356236	151359621	151359751	151359952	151360005	0.00289502	0.00382756	0.00489245	0.523805	0.93492	0
ENSMUSG00000023150.14	Ivns1abp	chr1	151360931	151361058	151361142	151361274	151361461	151361635	0.009343	0.0248843	0.00735563	0.569894	0.946564	0
ENSMUSG00000053286.11	Trmt1l	chr1	151435727	151435841	151439281	151439393	151439515	151439580	0.018285	0.0167876	0.00467253	0.153611	0.896772	0
ENSMUSG00000053286.11	Trmt1l	chr1	151435727	151435841	151439515	151439580	151440805	151440935	0.00284299	0.0328957	0.0176846	0.899414	0.999593	0
ENSMUSG00000053286.11	Trmt1l	chr1	151449899	151450112	151450323	151450380	151452047	151452238	0.0295347	0.0349138	0.0262677	0.32383	0.898112	0
ENSMUSG00000053286.11	Trmt1l	chr1	151453884	151454051	151454977	151455040	151457462	151457589	0.046396	0.0210299	0.0872971	0.528187	0.937281	0
ENSMUSG00000026483.13	Fam129a	chr1	151571495	151571584	151636403	151636534	151641427	151641559	0.0211406	0.0155137	0.00851936	0.109976	0.896772	0
ENSMUSG00000026483.13	Fam129a	chr1	151705986	151706097	151709096	151709204	151715659	151715771	0.00386293	0.0158034	0.0183664	0.819869	0.999593	0
ENSMUSG00000026483.13	Fam129a	chr1	151709096	151709204	151714507	151714662	151715659	151715771	0.00499075	0.00875458	0.00386397	0.43045	0.930278	0
ENSMUSG00000043019.12	Edem3	chr1	151804277	151804443	151804664	151804819	151805849	151805946	0.00151888	0.0108458	0.0130043	0.899441	0.999593	0
ENSMUSG00000008475.13	Arpc5	chr1	152768860	152768933	152771363	152771540	152774259	152774277	0.00200214	0.00527005	0.00406517	0.652516	0.963174	0
ENSMUSG00000066800.11	Rnasel	chr1	153752851	153752947	153753606	153755213	153755950	153756036	0.0474444	0.0457267	0.106157	0.588608	0.948071	0
ENSMUSG00000066800.11	Rnasel	chr1	153752851	153752947	153753634	153755213	153755950	153756036	0.0647115	0.0622871	0.284836	0.697475	0.973147	0
ENSMUSG00000066800.11	Rnasel	chr1	153752851	153752947	153753697	153755213	153755950	153756036	0.0583333	0.178536	0.0471405	0.573931	0.946802	0
ENSMUSG00000066800.11	Rnasel	chr1	153752851	153752947	153753721	153755213	153755950	153756036	0.0163743	0.111869	0.0132324	0.764438	0.99541	0
ENSMUSG00000026473.16	Glul	chr1	153907019	153907147	153907285	153907485	153907863	153908182	0.0147464	0.0121147	0.00698377	0.147352	0.896772	0
ENSMUSG00000026473.16	Glul	chr1	153907019	153907147	153907297	153907485	153907863	153908182	0	0.234549	0	0.87325	0.999593	0
ENSMUSG00000026473.16	Glul	chr1	153907019	153907147	153907405	153907485	153907863	153908182	0	0.118993	0	0.946876	0.999593	0
ENSMUSG00000026470.14	Stx6	chr1	155177853	155177948	155181183	155181355	155187777	155187840	0.00254804	0.00507792	0.00447801	0.583608	0.947765	0
ENSMUSG00000033701.13	Acbd6	chr1	155564656	155564721	155567584	155567681	155601453	155601536	0.020692	0.0196875	0	0.167596	0.896772	0
ENSMUSG00000033701.13	Acbd6	chr1	155601453	155601536	155615866	155615972	155624868	155624958	0.0342131	0.111745	0.042855	0.641098	0.960718	0
ENSMUSG00000033701.13	Acbd6	chr1	155624868	155624958	155677203	155677234	155686948	155687095	0.0844017	0.0924686	0	0.214413	0.896772	0
ENSMUSG00000050565.16	Tor1aip2	chr1	156035725	156035920	156041074	156041134	156051293	156051623	0.0956928	0.0264037	0.0567865	0.132704	0.896772	0
ENSMUSG00000050565.16	Tor1aip2	chr1	156035725	156035920	156041074	156041134	156059410	156059542	0.0181875	0.0135007	0.0479263	0.657212	0.963995	0
ENSMUSG00000050565.16	Tor1aip2	chr1	156035725	156035920	156051293	156051623	156059410	156059542	0	0	0.0989425	0.971088	0.999593	0
ENSMUSG00000050565.16	Tor1aip2	chr1	156035771	156036091	156041074	156041134	156051278	156051623	0	0.0214868	0	0.99309	0.999593	0
ENSMUSG00000050565.16	Tor1aip2	chr1	156035771	156036091	156041074	156041134	156051293	156051623	0.0627703	0.252535	0.0552734	0.651334	0.96305	0
ENSMUSG00000050565.16	Tor1aip2	chr1	156035771	156036091	156041074	156041134	156059410	156059542	0.0103865	0.136055	0.0386245	0.864588	0.999593	0
ENSMUSG00000050565.16	Tor1aip2	chr1	156035771	156036091	156051293	156051623	156059410	156059542	0.0670677	0.0669818	0.076972	0.377973	0.912558	0
ENSMUSG00000050565.16	Tor1aip2	chr1	156040916	156041002	156041074	156041134	156051278	156051623	0	0.0376003	0	0.982303	0.999593	0
ENSMUSG00000050565.16	Tor1aip2	chr1	156040916	156041002	156041074	156041134	156051293	156051623	0.0316978	0.0572051	0.0509448	0.549523	0.943134	0
ENSMUSG00000050565.16	Tor1aip2	chr1	156040916	156041002	156041074	156041134	156059410	156059542	0.0354266	0.219735	0.0387834	0.88473	0.999593	0
ENSMUSG00000050565.16	Tor1aip2	chr1	156040916	156041002	156051278	156051623	156059410	156059542	0.801774	0.0553999	0.031427	1.73521e-05	0.227444	0
ENSMUSG00000050565.16	Tor1aip2	chr1	156040916	156041002	156051293	156051623	156059410	156059542	0.0573145	0.0278535	0.0263991	0.0765185	0.896772	0
ENSMUSG00000050565.16	Tor1aip2	chr1	156041074	156041134	156051278	156051623	156059410	156059542	0.797866	0.0974438	0	0.000366652	0.584562	0
ENSMUSG00000050565.16	Tor1aip2	chr1	156041074	156041134	156051293	156051623	156059410	156059542	0.0430433	0.0412182	0.0250526	0.210377	0.896772	0
ENSMUSG00000050565.16	Tor1aip2	chr1	156051293	156051623	156059410	156059587	156061587	156062169	0.00289185	0.0114959	0.00529668	0.719961	0.981273	0
ENSMUSG00000050565.16	Tor1aip2	chr1	156062046	156062169	156062543	156062643	156063592	156063694	0.00347992	0.0104201	0.00222873	0.613096	0.951573	0
ENSMUSG00000026596.13	Abl2	chr1	156559067	156559205	156620838	156620901	156622484	156622655	0.109647	0.0401194	0.0925482	0.240312	0.896772	0
ENSMUSG00000026596.13	Abl2	chr1	156615922	156616058	156620838	156620901	156622484	156622655	0.00645462	0.0395442	0.0621908	0.893784	0.999593	0
ENSMUSG00000026596.13	Abl2	chr1	156622484	156622655	156625287	156625583	156629852	156629993	0.0443856	0.026056	0.0105337	0.0556912	0.896772	0
ENSMUSG00000033488.11	Cryzl2	chr1	157461951	157462049	157464408	157464467	157464964	157465030	0.00500977	0.0256077	0.0214874	0.821293	0.999593	0
ENSMUSG00000033488.11	Cryzl2	chr1	157467165	157467247	157470615	157470797	157472187	157472416	0.0171795	0.0477204	0.042855	0.693034	0.972394	0
ENSMUSG00000033488.11	Cryzl2	chr1	157467165	157467247	157470615	157470797	157488442	157488583	0.116667	0.05	0.0942809	0.195431	0.896772	0
ENSMUSG00000033488.11	Cryzl2	chr1	157467165	157467247	157472187	157472416	157488442	157488583	0	0.0795495	0	0.95988	0.999593	0
ENSMUSG00000026589.14	Sec16b	chr1	157526146	157526224	157526600	157526681	157529163	157529504	0.0502161	0.0380177	0.0268157	0.141143	0.896772	0
ENSMUSG00000026589.14	Sec16b	chr1	157529163	157529504	157531279	157531392	157532045	157532173	0.00805322	0.0309295	0.0138648	0.706634	0.97675	0
ENSMUSG00000026589.14	Sec16b	chr1	157529163	157529504	157531279	157531392	157532052	157532173	0.00447196	0.0303869	0.0184865	0.842247	0.999593	0
ENSMUSG00000040782.12	Cop1	chr1	159239561	159239621	159244588	159244686	159249201	159249266	0.00318183	0.0113831	0.0108367	0.767074	0.99632	0
ENSMUSG00000040782.12	Cop1	chr1	159244588	159244686	159244799	159244840	159249201	159249266	0.00830421	0.0135703	0.00152606	0.368502	0.910985	0
ENSMUSG00000040782.12	Cop1	chr1	159252547	159252616	159258646	159258742	159266756	159266816	0.0410219	0.0629536	0.0216805	0.368137	0.910985	0
ENSMUSG00000040782.12	Cop1	chr1	159252547	159252616	159266756	159266816	159278088	159278146	0.0777778	0.057735	0.0628539	0.243477	0.896772	0
ENSMUSG00000040782.12	Cop1	chr1	159266756	159266816	159268108	159268185	159278088	159278146	0.0070747	0.00808879	0.0014285	0.227639	0.896772	0
ENSMUSG00000040782.12	Cop1	chr1	159268108	159268185	159278088	159278146	159284547	159284662	0.00413861	0.00153008	0.0038337	0.262461	0.896772	0
ENSMUSG00000040782.12	Cop1	chr1	159284547	159284662	159288904	159289040	159306572	159306598	0.0222223	0.0177228	0	0.119152	0.896772	0
ENSMUSG00000040782.12	Cop1	chr1	159308882	159308964	159319723	159319840	159324916	159325027	0.0104683	0.0145827	0	0.302585	0.896772	0
ENSMUSG00000040782.12	Cop1	chr1	159308882	159308964	159319747	159319840	159324916	159325027	0.1875	0.139183	0.151523	0.221878	0.896772	0
ENSMUSG00000090394.8	4930523C07Rik	chr1	160044446	160044753	160044932	160045025	160070699	160070803	0.00978749	0.00555093	0.00320683	0.0557048	0.896772	0
ENSMUSG00000090394.8	4930523C07Rik	chr1	160044446	160044753	160070122	160070232	160070699	160070803	0.00335357	0.0107049	0.00861393	0.716413	0.979649	0
ENSMUSG00000090394.8	4930523C07Rik	chr1	160044446	160044753	160070699	160070803	160075030	160075715	0.00411177	0.0385311	0.0556566	0.925287	0.999593	0
ENSMUSG00000090394.8	4930523C07Rik	chr1	160070699	160070803	160071426	160072381	160075030	160080208	0.0132343	0.0194603	0.0281051	0.604775	0.950077	0
ENSMUSG00000090394.8	4930523C07Rik	chr1	160070699	160070803	160071426	160072616	160075030	160075715	0.0220278	0.0304688	0	0.297021	0.896772	0
ENSMUSG00000058267.13	Mrps14	chr1	160195214	160195311	160195447	160195545	160196945	160197104	0.00506803	0.00563056	0	0.216594	0.896772	0
ENSMUSG00000040423.11	Rc3h1	chr1	160955858	160955979	160959400	160959553	160962270	160962484	0.00291463	0.00127991	0.00447584	0.456209	0.930278	0
ENSMUSG00000040423.11	Rc3h1	chr1	160959400	160959553	160962270	160962484	160963478	160963569	0.0187862	0.0348938	0.00512396	0.422045	0.927824	0
ENSMUSG00000053332.13	Gas5	chr1	161036819	161036852	161037123	161037164	161037287	161037315	0.0208867	0.0416142	0.0193296	0.492275	0.930962	0
ENSMUSG00000053332.13	Gas5	chr1	161036819	161036852	161037123	161037315	161037504	161037547	0.0124865	0.0175805	0.018101	0.486152	0.930962	0
ENSMUSG00000053332.13	Gas5	chr1	161036819	161036852	161037287	161037315	161037504	161037547	0.00995317	0.0196048	0.0174818	0.581992	0.947381	0
ENSMUSG00000026708.16	Cenpl	chr1	161078328	161078480	161079867	161080010	161082907	161083381	0.0583333	0	0.0656167	0.331007	0.900193	0
ENSMUSG00000026585.13	Kifap3	chr1	163793948	163794103	163795984	163796040	163797251	163797393	0.00442271	0.0376314	0.0173372	0.859723	0.999593	0
ENSMUSG00000026585.13	Kifap3	chr1	163888205	163888305	163912071	163912137	163915724	163917109	0.0179641	0.057973	0.00789003	0.656476	0.963995	0
ENSMUSG00000026584.14	Scyl3	chr1	163934692	163934817	163936417	163936531	163938739	163938796	0.0376385	0.0818755	0.0199785	0.487228	0.930962	0
ENSMUSG00000026584.14	Scyl3	chr1	163938739	163938796	163939880	163939983	163941020	163941218	0.0530303	0.0393648	0.042855	0.237356	0.896772	0
ENSMUSG00000026579.8	F5	chr1	164209462	164209618	164211747	164211892	164214374	164214526	0.00686191	0.0113951	0.0190082	0.676997	0.967561	0
ENSMUSG00000026575.15	Nme7	chr1	164308096	164308250	164312852	164312938	164328292	164328400	0.0102789	0.0763416	0.0861946	0.8946	0.999593	0
ENSMUSG00000026575.15	Nme7	chr1	164308096	164308250	164312855	164312938	164328292	164328400	0.0225643	0.096441	0.119292	0.828246	0.999593	0
ENSMUSG00000000544.14	Gpa33	chr1	166130466	166130604	166146638	166146793	166152567	166152784	0.0147278	0.0111412	0.0202621	0.421258	0.927519	0
ENSMUSG00000040612.13	Ildr2	chr1	166270498	166270618	166294590	166294737	166303501	166303615	0	0.0288675	0	0.982021	0.999593	0
ENSMUSG00000026563.13	Tada1	chr1	166379338	166379476	166380781	166380873	166382126	166382218	0.00109127	0.00412393	0.00491046	0.809222	0.999593	0
ENSMUSG00000052428.10	Tmco1	chr1	167314136	167314166	167316242	167316289	167319261	167319329	0.0203137	0.0242487	0.0485269	0.622978	0.954271	0
ENSMUSG00000026687.14	Aldh9a1	chr1	167352519	167352665	167353916	167354038	167354426	167354488	0.00362595	0.0150752	0.034493	0.91072	0.999593	0
ENSMUSG00000026687.14	Aldh9a1	chr1	167354426	167354556	167355671	167355806	167356529	167356726	0.0185106	0.0204251	0.042855	0.611741	0.951398	0
ENSMUSG00000102418.1	Sh2d1b1	chr1	170277319	170277509	170277592	170277734	170279783	170279847	0.109927	0.161695	0.0508437	0.337891	0.901782	0
ENSMUSG00000102418.1	Sh2d1b1	chr1	170277319	170277509	170279783	170279847	170283134	170283297	0.0145833	0.176887	0.0345272	0.961611	0.999593	0
ENSMUSG00000026649.14	Cfap126	chr1	171125269	171125350	171125706	171125893	171126033	171126036	0.035	0.00866025	0.0432049	0.368668	0.910985	0
ENSMUSG00000052423.14	B4galt3	chr1	171270342	171270414	171270582	171270689	171271202	171271360	0.000567033	0.00956993	0.0060872	0.941559	0.999593	0
ENSMUSG00000052423.14	B4galt3	chr1	171270342	171270414	171270991	171271105	171271202	171271360	0.0135765	0.00515491	0.00743324	0.102214	0.896772	0
ENSMUSG00000013973.12	Dedd	chr1	171329407	171329526	171331233	171331285	171338251	171338339	0.0219647	0.0532942	0.0455185	0.638573	0.959582	0
ENSMUSG00000013973.12	Dedd	chr1	171329407	171329526	171331252	171331285	171338251	171338339	0.0128138	0.154317	0.0956637	0.877168	0.999593	0
ENSMUSG00000013973.12	Dedd	chr1	171329609	171329692	171331252	171331285	171338251	171338339	0.210167	0.0379836	0.186578	0.232189	0.896772	0
ENSMUSG00000013973.12	Dedd	chr1	171338251	171338640	171338822	171338930	171340192	171340225	0.0148748	0.0210699	0.0171548	0.428954	0.930278	0
ENSMUSG00000006411.12	Nectin4	chr1	171385662	171385738	171386159	171386234	171386580	171388285	0.016039	0.0718542	0.109799	0.84576	0.999593	0
ENSMUSG00000026553.17	Copa	chr1	172087551	172087665	172089096	172089170	172090938	172091019	0.000283602	0.0109392	0.012529	0.979891	0.999593	0
ENSMUSG00000026553.17	Copa	chr1	172092244	172092354	172097673	172097783	172099667	172099767	0.00168723	0.00303747	0.00190338	0.479637	0.930278	0
ENSMUSG00000026553.17	Copa	chr1	172104173	172104259	172104411	172104552	172105185	172105252	0.00117015	0.00489278	0.0123035	0.90307	0.999593	0
ENSMUSG00000026553.17	Copa	chr1	172106116	172106192	172108311	172108394	172109785	172109925	0.00294865	0.0110944	0.00453127	0.702712	0.975015	0
ENSMUSG00000026553.17	Copa	chr1	172113333	172113429	172114744	172114833	172115022	172115146	0.00268994	0.00788118	0.00606964	0.684884	0.97121	0
ENSMUSG00000026554.15	Dcaf8	chr1	172148139	172148168	172149248	172149321	172165847	172165918	0.00439523	0.00195491	0.00404093	0.259812	0.896772	0
ENSMUSG00000026554.15	Dcaf8	chr1	172149248	172149321	172165847	172165918	172172328	172172981	0.00341277	0.00491746	0.00660493	0.570723	0.946564	0
ENSMUSG00000026554.15	Dcaf8	chr1	172172328	172172981	172173170	172173292	172173942	172174083	0.00644043	0.0073211	0	0.224534	0.896772	0
ENSMUSG00000026554.15	Dcaf8	chr1	172175486	172175577	172179183	172179315	172179906	172180017	0.00142406	0.00511413	0.00236265	0.695248	0.972935	0
ENSMUSG00000026554.15	Dcaf8	chr1	172175486	172175577	172179906	172180017	172186295	172186368	0.000239912	0.00419528	0.00558839	0.961051	0.999593	0
ENSMUSG00000026554.15	Dcaf8	chr1	172186295	172186368	172186854	172186912	172187352	172187460	0.0190627	0.0199352	0.0226799	0.390128	0.918267	0
ENSMUSG00000026554.15	Dcaf8	chr1	172186295	172186368	172187352	172189069	172192517	172192571	0.102343	0.0447944	0.181309	0.502982	0.930962	0
ENSMUSG00000026554.15	Dcaf8	chr1	172187380	172187460	172188938	172189069	172192517	172192571	0.000711606	0.0097856	0.00899627	0.937382	0.999593	0
ENSMUSG00000026554.15	Dcaf8	chr1	172188944	172189069	172190843	172191079	172192517	172192571	0.00348697	0.00680978	0.00303728	0.476737	0.930278	0
ENSMUSG00000037995.15	Igsf9	chr1	172482230	172482260	172484280	172484970	172489512	172489593	0.00315126	0.0309295	0.0207973	0.893336	0.999593	0
ENSMUSG00000037995.15	Igsf9	chr1	172484463	172484546	172484781	172484970	172489512	172489665	0.0136639	0.0125301	0.0126562	0.297998	0.896772	0
ENSMUSG00000037995.15	Igsf9	chr1	172493486	172493627	172493851	172494214	172494405	172494556	0.222568	0.139009	0.101925	0.0948727	0.896772	0
ENSMUSG00000037995.15	Igsf9	chr1	172493486	172493627	172494084	172494214	172494405	172494556	0.0472767	0.395695	0.327157	0.844899	0.999593	0
ENSMUSG00000037995.15	Igsf9	chr1	172493486	172493627	172494097	172494214	172494405	172494556	0.0275987	0.0393287	0.026558	0.390303	0.918443	0
ENSMUSG00000037995.15	Igsf9	chr1	172494477	172494556	172494752	172494876	172495107	172495283	0.00118998	0.0141971	0.00841141	0.913796	0.999593	0
ENSMUSG00000037995.15	Igsf9	chr1	172496179	172496327	172496597	172496640	172496885	172497746	0.0112744	0.0124969	0	0.216406	0.896772	0
ENSMUSG00000026547.15	Tagln2	chr1	172500244	172500332	172502098	172502237	172505119	172505223	0.00137357	0.00231146	0.00152387	0.458928	0.930278	0
ENSMUSG00000026547.15	Tagln2	chr1	172500244	172500332	172504277	172504350	172505119	172505327	8.3604e-05	0.000301541	0.000364441	0.802305	0.999593	0
ENSMUSG00000026547.15	Tagln2	chr1	172501251	172501314	172502098	172502237	172505119	172505327	0.0546875	0.0234375	0.0796722	0.437991	0.930278	0
ENSMUSG00000026547.15	Tagln2	chr1	172505138	172505327	172505760	172505935	172506185	172506288	0.000698558	0.00430003	0.00122786	0.80354	0.999593	0
ENSMUSG00000026547.15	Tagln2	chr1	172505138	172505327	172505874	172505935	172506185	172506288	0.150538	0.193548	0.0608264	0.26913	0.896772	0
ENSMUSG00000026546.16	Cfap45	chr1	172521138	172521181	172527789	172527915	172529809	172529952	0.103704	0.07698	0.0419026	0.118772	0.896772	0
ENSMUSG00000037860.15	Aim2	chr1	173420597	173420686	173427758	173427898	173452827	173452948	0.0806944	0.0708811	0.065211	0.249761	0.896772	0
ENSMUSG00000037860.15	Aim2	chr1	173452827	173452948	173454223	173454313	173455333	173455595	0.0266667	0	0.0215499	0.224125	0.896772	0
ENSMUSG00000037860.15	Aim2	chr1	173455353	173455615	173459697	173459849	173461906	173462007	0.0163757	0.0281445	0.0109193	0.410537	0.92256	0
ENSMUSG00000037860.15	Aim2	chr1	173461906	173462320	173462755	173462870	173463858	173464047	0.0958536	0.1034	0	0.196424	0.896772	0
ENSMUSG00000037860.15	Aim2	chr1	173461906	173462320	173463858	173464047	173464970	173466032	0.046875	0.0115986	0.0378807	0.221427	0.896772	0
ENSMUSG00000026504.17	Sdccag8	chr1	176814659	176815055	176824738	176824904	176831056	176831182	0.0777778	0.057735	0.0628539	0.22602	0.896772	0
ENSMUSG00000026504.17	Sdccag8	chr1	176814659	176815055	176824751	176824904	176831056	176831182	0.0777778	0.057735	0.0628539	0.22602	0.896772	0
ENSMUSG00000026504.17	Sdccag8	chr1	176824751	176824904	176826198	176826284	176831056	176831182	0	0.146969	0	0.949678	0.999593	0
ENSMUSG00000026504.17	Sdccag8	chr1	176826198	176826284	176828869	176828983	176831056	176831182	0.120738	0.0484497	0.0293631	0.0184194	0.896772	0
ENSMUSG00000026504.17	Sdccag8	chr1	176853763	176853902	176866408	176866458	176868211	176868364	0.00258415	0.0185383	0.00347163	0.837549	0.999593	0
ENSMUSG00000026504.17	Sdccag8	chr1	176853763	176853902	176866408	176866531	176868211	176868364	0.00736693	0.00807712	0	0.211907	0.896772	0
ENSMUSG00000026504.17	Sdccag8	chr1	176853763	176853902	176868211	176868364	176874563	176874698	0.00653065	0.0329139	0.0189628	0.797298	0.999593	0
ENSMUSG00000026504.17	Sdccag8	chr1	176868211	176868364	176872052	176872260	176874563	176874698	0.0104087	0.0142362	0.0164518	0.506224	0.930962	0
ENSMUSG00000026504.17	Sdccag8	chr1	176868211	176868364	176872134	176872260	176874563	176874698	0.0353846	0.0359816	0	0.186715	0.896772	0
ENSMUSG00000063659.11	Zbtb18	chr1	177442543	177442595	177443223	177443341	177447088	177447096	0.0709574	0.0648891	0.0982923	0.437407	0.930278	0
ENSMUSG00000063659.11	Zbtb18	chr1	177442543	177442595	177443223	177444092	177447088	177447096	0.0123018	0.0700995	0.0529029	0.816597	0.999593	0
ENSMUSG00000063659.11	Zbtb18	chr1	177443223	177443341	177443984	177444092	177447088	177447096	0.157602	0.0681817	0.0756435	0.0872811	0.896772	0
ENSMUSG00000015962.5	1700016C15Rik	chr1	177740994	177741090	177743253	177743426	177752915	177753035	0	0.166372	0	0.93274	0.999593	0
ENSMUSG00000026502.13	Desi2	chr1	178187846	178187957	178198217	178198290	178237911	178237984	0.060844	0.0428026	0.00725238	0.0846682	0.896772	0
ENSMUSG00000026500.6	Cox20	chr1	178321744	178321859	178321941	178322005	178322480	178322693	0.0586261	0.0648202	0.0158672	0.216652	0.896772	0
ENSMUSG00000026500.6	Cox20	chr1	178321744	178321859	178321945	178322005	178322480	178322693	0.0338285	0.198111	0.288219	0.840275	0.999593	0
ENSMUSG00000038936.13	Sccpdh	chr1	179681432	179681552	179681650	179681707	179684204	179684316	0	0.0123712	0.014285	0.999224	0.999815	0
ENSMUSG00000026490.18	Cdc42bpa	chr1	179961109	179961287	179970881	179970954	179999361	179999453	0.00662416	0.00863915	0.0105371	0.505548	0.930962	0
ENSMUSG00000026490.18	Cdc42bpa	chr1	179999361	179999453	180024644	180024802	180031504	180031588	0.00431083	0.0100193	0.00716333	0.601133	0.95003	0
ENSMUSG00000026490.18	Cdc42bpa	chr1	180036828	180036924	180040051	180040200	180061789	180061883	0.0117709	0.0172268	0.00610688	0.3379	0.901782	0
ENSMUSG00000026490.18	Cdc42bpa	chr1	180067150	180067399	180069296	180069376	180072344	180072511	0.0113999	0.00229107	0.0179925	0.464752	0.930278	0
ENSMUSG00000026490.18	Cdc42bpa	chr1	180084482	180084505	180093943	180094186	180094380	180094491	0.0124563	0.0530567	0.0498288	0.804302	0.999593	0
ENSMUSG00000026490.18	Cdc42bpa	chr1	180094380	180094491	180101024	180101272	180109153	180109278	0.00393939	0.0393648	0.0377124	0.916881	0.999593	0
ENSMUSG00000026490.18	Cdc42bpa	chr1	180101143	180101272	180104586	180104631	180106046	180106152	0.00321117	0.00668313	0.00495503	0.565955	0.945622	0
ENSMUSG00000026490.18	Cdc42bpa	chr1	180101143	180101272	180106046	180106152	180109153	180109278	0.00641677	0.0121238	0.0124619	0.597591	0.949629	0
ENSMUSG00000026490.18	Cdc42bpa	chr1	180101143	180101272	180109153	180109278	180111263	180111369	0.105911	0.118098	0	0.221717	0.896772	0
ENSMUSG00000026490.18	Cdc42bpa	chr1	180109264	180109278	180111202	180111453	180111744	180111891	0.100962	0.0249815	0.0815892	0.202226	0.896772	0
ENSMUSG00000026490.18	Cdc42bpa	chr1	180109264	180109278	180111263	180111369	180111744	180111891	0.0207163	0.0073424	0.0124149	0.124111	0.896772	0
ENSMUSG00000026490.18	Cdc42bpa	chr1	180117666	180117743	180134296	180134380	180136651	180136757	0.00278984	0.0267843	0.0106131	0.872783	0.999593	0
ENSMUSG00000026490.18	Cdc42bpa	chr1	180137729	180137866	180138431	180138571	180139722	180139804	0.0065249	0.0141196	0.00585317	0.514534	0.932361	0
ENSMUSG00000026490.18	Cdc42bpa	chr1	180150134	180150258	180151159	180151277	180159605	180159723	0.0323632	0.0227901	0.0269768	0.242134	0.896772	0
ENSMUSG00000026490.18	Cdc42bpa	chr1	180151159	180151277	180155794	180155980	180159605	180159723	0.00545355	0.0235123	0.0181309	0.78455	0.999593	0
ENSMUSG00000026496.11	Parp1	chr1	180588358	180588427	180588649	180588782	180589397	180589593	0.0324658	0.0124323	0.0249197	0.197456	0.896772	0
ENSMUSG00000058729.13	Lin9	chr1	180641365	180641397	180641849	180641992	180648300	180648333	0.031746	0.0412393	0.0785674	0.647835	0.962263	0
ENSMUSG00000058729.13	Lin9	chr1	180641365	180641397	180641916	180641992	180648300	180648333	0.132047	0.0801875	0.0445484	0.0641753	0.896772	0
ENSMUSG00000026499.5	Acbd3	chr1	180736695	180736850	180738462	180738637	180745070	180745257	0.0127112	0.0233074	0.00967007	0.442034	0.930278	0
ENSMUSG00000038806.7	Sde2	chr1	180851126	180851292	180855802	180855920	180858122	180858234	0.00568463	0.0147924	0.0131682	0.674573	0.967105	0
ENSMUSG00000038806.7	Sde2	chr1	180858122	180858234	180859900	180860070	180861097	180861218	0.0140615	0.00156889	0.0131042	0.268239	0.896772	0
ENSMUSG00000026519.16	Tmem63a	chr1	180946565	180946765	180948812	180948892	180952131	180952172	0.00331007	0.00596604	0.0117851	0.739244	0.98627	0
ENSMUSG00000026519.16	Tmem63a	chr1	180952131	180952195	180952980	180953018	180954807	180954872	0.00569184	0.0168706	0.0218243	0.771833	0.998181	0
ENSMUSG00000026519.16	Tmem63a	chr1	180957976	180958047	180960425	180960506	180960734	180960841	0.0138415	0.0089405	0.00433614	0.0740881	0.896772	0
ENSMUSG00000062169.13	Cnih4	chr1	181155858	181155971	181162074	181162215	181166180	181168994	0.0054553	0.00927868	0.00306107	0.399485	0.922474	0
ENSMUSG00000026511.7	Srp9	chr1	182124749	182124975	182128683	182128752	182131335	182131919	0.00855098	0.0124178	0.00562324	0.347605	0.903606	0
ENSMUSG00000026510.10	Trp53bp2	chr1	182435351	182435434	182436873	182436999	182440836	182441011	0.0686275	0.0975478	0	0.3038	0.896772	0
ENSMUSG00000026510.10	Trp53bp2	chr1	182435351	182435434	182436897	182436999	182440836	182441011	0.00759217	0.0176366	0.0130501	0.606195	0.95036	0
ENSMUSG00000026510.10	Trp53bp2	chr1	182435351	182435434	182440836	182441011	182441621	182441803	0.092803	0.0229628	0.149992	0.470536	0.930278	0
ENSMUSG00000026510.10	Trp53bp2	chr1	182442132	182442297	182442632	182442861	182444324	182444432	0.0106761	0.00437387	0.0186695	0.504614	0.930962	0
ENSMUSG00000038599.14	Capn8	chr1	182599541	182599625	182602028	182602114	182603646	182603721	0.0162626	0.0797724	0.0131422	0.72589	0.982418	0
ENSMUSG00000038576.15	Susd4	chr1	182765005	182765188	182833062	182833275	182853956	182854040	0	0.0255155	0	0.991778	0.999593	0
ENSMUSG00000079164.8	Tlr5	chr1	182954827	182954882	182957945	182958069	182969013	182969141	0.0887626	0.0498619	0.071731	0.205319	0.896772	0
ENSMUSG00000042901.10	Aida	chr1	183297569	183297628	183304677	183304747	183306423	183306477	0.000927103	0.00715723	0.00453274	0.865383	0.999593	0
ENSMUSG00000042901.10	Aida	chr1	183306430	183306477	183306884	183306939	183313660	183313724	0.00925632	0.0152575	0.025036	0.669932	0.966508	0
ENSMUSG00000042901.10	Aida	chr1	183316579	183316702	183318811	183318934	183322283	183322312	0.0366266	0.0334219	0.0160342	0.167656	0.896772	0
ENSMUSG00000042901.10	Aida	chr1	183318811	183318934	183320070	183320341	183322283	183322312	0.0115642	0.0167774	0.00530451	0.330765	0.900193	0
ENSMUSG00000072258.10	Taf1a	chr1	183404326	183404485	183405895	183405962	183406543	183406635	0.0979288	0.0964454	0.243561	0.693615	0.972529	0
ENSMUSG00000039384.8	Dusp10	chr1	184036800	184037652	184068851	184069223	184074257	184075636	0.00170736	0.00658574	0.00779181	0.811785	0.999593	0
ENSMUSG00000039318.12	Rab3gap2	chr1	185221844	185221909	185232960	185233084	185234120	185234202	0.00975531	0.0253294	0.0048797	0.555807	0.943411	0
ENSMUSG00000039318.12	Rab3gap2	chr1	185221844	185221909	185232964	185233084	185234120	185234202	0.0168761	0.168154	0.0911834	0.929505	0.999593	0
ENSMUSG00000039318.12	Rab3gap2	chr1	185221844	185221909	185233037	185233084	185234120	185234202	0.118035	0.0876184	0.0953868	0.224791	0.896772	0
ENSMUSG00000039318.12	Rab3gap2	chr1	185258497	185258625	185259313	185259527	185260404	185260498	0.1875	0.139183	0.151523	0.221878	0.896772	0
ENSMUSG00000039318.12	Rab3gap2	chr1	185262678	185262839	185263630	185263859	185266900	185267014	0.0486146	0.0101526	0.0417908	0.237852	0.896772	0
ENSMUSG00000039318.12	Rab3gap2	chr1	185278147	185278366	185281650	185281740	185282297	185282510	0.0605107	0.0769501	0.029859	0.284073	0.896772	0
ENSMUSG00000039318.12	Rab3gap2	chr1	185282322	185282510	185283381	185283540	185283846	185284048	0.013569	0.0135939	0	0.182283	0.896772	0
ENSMUSG00000026617.16	Bpnt1	chr1	185332206	185332263	185338105	185338232	185341222	185341327	0.00207145	0.0284793	0.00977158	0.921128	0.999593	0
ENSMUSG00000026617.16	Bpnt1	chr1	185348743	185348835	185349836	185349881	185352181	185352379	0.0355346	0.0473766	0.0435595	0.434213	0.930278	0
ENSMUSG00000026615.14	Eprs	chr1	185369576	185369676	185370888	185371045	185379544	185379737	0.0954545	0.104743	0	0.220352	0.896772	0
ENSMUSG00000026615.14	Eprs	chr1	185370994	185371045	185372917	185373057	185374117	185374212	0.00111272	0.0184927	0.00912829	0.936794	0.999593	0
ENSMUSG00000026615.14	Eprs	chr1	185370994	185371045	185372917	185373057	185379544	185379737	0.0236111	0.0175267	0.136309	0.883936	0.999593	0
ENSMUSG00000026615.14	Eprs	chr1	185370888	185371045	185374117	185374180	185379544	185379737	0.0260784	0.11838	0.168125	0.890235	0.999593	0
ENSMUSG00000026615.14	Eprs	chr1	185370994	185371045	185374117	185374212	185379544	185379737	0.0387364	0.197119	0.146285	0.840836	0.999593	0
ENSMUSG00000026615.14	Eprs	chr1	185370888	185371045	185378774	185378901	185379544	185379737	0.0734595	0.0545295	0.0362619	0.125231	0.896772	0
ENSMUSG00000026615.14	Eprs	chr1	185372917	185373057	185374117	185374212	185379544	185379737	0.0378853	0.014586	0.0513701	0.406047	0.922474	0
ENSMUSG00000026615.14	Eprs	chr1	185374117	185374212	185378774	185378901	185379544	185379737	0.0258178	0.0146225	0.0252668	0.2832	0.896772	0
ENSMUSG00000026615.14	Eprs	chr1	185387058	185387118	185394349	185394473	185396029	185396166	0	0.124803	0	0.9564	0.999593	0
ENSMUSG00000026615.14	Eprs	chr1	185387058	185387118	185394362	185394473	185396029	185396166	0.00166113	0.00521343	0.0071066	0.794009	0.999593	0
ENSMUSG00000039210.16	Gpatch2	chr1	187226179	187226219	187229598	187229660	187230783	187230845	0.00585367	0.0255276	0.0148863	0.750998	0.99125	0
ENSMUSG00000039210.16	Gpatch2	chr1	187226179	187226219	187230783	187230845	187233130	187233313	4.28972e-05	0.0213138	0.042855	0.993086	0.999593	0
ENSMUSG00000039210.16	Gpatch2	chr1	187304329	187304397	187316523	187316563	187322283	187322354	0.0609538	0.0943387	0.118565	0.570368	0.946564	0
ENSMUSG00000039210.16	Gpatch2	chr1	187304329	187304397	187322283	187322354	187341486	187341575	0.0264897	0.154122	0.272724	0.858549	0.999593	0
ENSMUSG00000026604.17	Ptpn14	chr1	189728606	189728664	189786635	189786948	189798511	189798681	0.00585491	0.0546189	0.0387987	0.887842	0.999593	0
ENSMUSG00000026604.17	Ptpn14	chr1	189786671	189786948	189798511	189798681	189822588	189822686	0.0125487	0.0224115	0.0320966	0.65949	0.964321	0
ENSMUSG00000026604.17	Ptpn14	chr1	189833317	189833405	189836151	189836218	189836340	189836429	0.00314697	0.00362891	0	0.229866	0.896772	0
ENSMUSG00000026604.17	Ptpn14	chr1	189833317	189833405	189836340	189836429	189839471	189839559	0.0175292	0.0293943	0.00707619	0.383077	0.914938	0
ENSMUSG00000026604.17	Ptpn14	chr1	189833317	189833405	189836345	189836429	189839471	189839559	0.201567	0.149625	0.0815688	0.128598	0.896772	0
ENSMUSG00000026604.17	Ptpn14	chr1	189863203	189863438	189865371	189865535	189869926	189870068	0.000809822	0.0223972	0.017142	0.963266	0.999593	0
ENSMUSG00000026634.16	Angel2	chr1	190928491	190928758	190932866	190933192	190937443	190937477	0.0905376	0.0375877	0.0347225	0.0472877	0.896772	0
ENSMUSG00000026634.16	Angel2	chr1	190928850	190928904	190932866	190933192	190937443	190937477	0.135449	0.161961	0	0.254505	0.896772	0
ENSMUSG00000026634.16	Angel2	chr1	190937443	190937700	190939086	190939156	190940873	190941295	0.0238696	0.0175546	0.0240816	0.305194	0.896772	0
ENSMUSG00000026634.16	Angel2	chr1	190940873	190941295	190942120	190942247	190942829	190942887	0.108546	0.0660932	0.0225613	0.0628338	0.896772	0
ENSMUSG00000037461.10	Ints7	chr1	191575775	191575951	191582398	191582528	191583178	191583325	0.0363689	0.0546147	0.0144573	0.334794	0.901257	0
ENSMUSG00000037461.10	Ints7	chr1	191575775	191575951	191583178	191583325	191586523	191586661	0.170006	0.167472	0.127948	0.277867	0.896772	0
ENSMUSG00000037461.10	Ints7	chr1	191596886	191597009	191602244	191602362	191604806	191604941	0.0288616	0.0530085	0.0243785	0.44826	0.930278	0
ENSMUSG00000026623.16	Lpgat1	chr1	191718026	191718205	191718428	191718597	191719353	191719398	0.0776553	0.130128	0.0566888	0.428241	0.930278	0
ENSMUSG00000026623.16	Lpgat1	chr1	191718026	191718205	191718428	191718597	191719357	191719618	0.170525	0.202565	0.0872971	0.266676	0.896772	0
ENSMUSG00000026623.16	Lpgat1	chr1	191719357	191719618	191749539	191749658	191755931	191756027	0.00654719	0.005192	0.0134984	0.569309	0.946564	0
ENSMUSG00000026638.15	Irf6	chr1	193153153	193153299	193157215	193157392	193161612	193161817	0.00454676	0.00725938	0.00364019	0.399791	0.922474	0
ENSMUSG00000026638.15	Irf6	chr1	193153153	193153299	193157277	193157392	193161612	193161817	0	0.353553	0	0.849529	0.999593	0
ENSMUSG00000026639.18	Lamb3	chr1	193301992	193302141	193303487	193303547	193304435	193304590	0.00957571	0.0262693	0.00306022	0.571606	0.946564	0
ENSMUSG00000026639.18	Lamb3	chr1	193321052	193321126	193323736	193323928	193325559	193325623	0.0017899	0.00307101	0.00503877	0.683189	0.970237	0
ENSMUSG00000026639.18	Lamb3	chr1	193325888	193326073	193327893	193328014	193328634	193328823	0.000263462	0.00804952	0.0128822	0.982912	0.999593	0
ENSMUSG00000026639.18	Lamb3	chr1	193334415	193334633	193334848	193335046	193335356	193335501	0.00247073	0.00346566	0.000391298	0.305402	0.896772	0
ENSMUSG00000026639.18	Lamb3	chr1	193334415	193334633	193334946	193335046	193335356	193335501	0	0.0835343	0	0.97058	0.999593	0
ENSMUSG00000026639.18	Lamb3	chr1	193335356	193335501	193338805	193339013	193339388	193339467	0.000800605	0.00103055	0	0.271142	0.896772	0
ENSMUSG00000026639.18	Lamb3	chr1	193339388	193339486	193339884	193340072	193340747	193340901	0.388889	0.166667	0.31427	0.16438	0.896772	0
ENSMUSG00000026639.18	Lamb3	chr1	193339495	193339530	193339884	193340061	193340747	193340901	0.000723126	0.00403077	0.00155043	0.791244	0.999593	0
ENSMUSG00000026639.18	Lamb3	chr1	193339388	193339530	193339884	193340072	193340747	193340901	0.175	0.129904	0.141421	0.220309	0.896772	0
ENSMUSG00000026639.18	Lamb3	chr1	193339388	193339530	193339890	193340061	193340747	193340901	0.155556	0.11547	0.332592	0.634243	0.95863	0
ENSMUSG00000026640.12	Plxna2	chr1	194807501	194807671	194810061	194810274	194810856	194811007	0.0397089	0.0805605	0.0096205	0.454856	0.930278	0
ENSMUSG00000033845.13	Mrpl15	chr1	4782567	4782733	4783950	4784105	4785572	4785692	0.0630787	0.0542831	0.0183411	0.135661	0.896772	0
ENSMUSG00000045210.8	Vcpip1	chr1	9718621	9725350	9736965	9737052	9745449	9748382	0.00738573	0.00941332	0.0181309	0.634862	0.958781	0
ENSMUSG00000025917.9	Cops5	chr1	10030598	10030710	10032338	10032424	10033257	10033323	0.00953737	0	0.0066208	0.179089	0.896772	0
ENSMUSG00000067851.11	Arfgef1	chr1	10138689	10138996	10140466	10140584	10141558	10141697	0.0343358	0.0294003	0	0.136844	0.896772	0
ENSMUSG00000067851.11	Arfgef1	chr1	10144717	10144804	10147402	10147535	10151800	10151873	0.0416591	0.338633	0.0336657	0.98426	0.999593	0
ENSMUSG00000067851.11	Arfgef1	chr1	10144717	10144857	10147402	10147535	10151800	10151873	0.00102029	0.0153473	0.0111245	0.936754	0.999593	0
ENSMUSG00000067851.11	Arfgef1	chr1	10160962	10161003	10163696	10163787	10172833	10172984	0.00544678	0.00566104	0.011445	0.581403	0.947381	0
ENSMUSG00000067851.11	Arfgef1	chr1	10163696	10163787	10172833	10172984	10173193	10173352	0.0095266	0.00647865	0	0.0842898	0.896772	0
ENSMUSG00000067851.11	Arfgef1	chr1	10204807	10204909	10209635	10209701	10213043	10213223	0.042042	0.0785387	0.0339751	0.448885	0.930278	0
ENSMUSG00000067851.11	Arfgef1	chr1	10215836	10215993	10216528	10216559	10232370	10232449	0.000131399	0.00546587	0.00117144	0.971716	0.999593	0
ENSMUSG00000025938.16	Slco5a1	chr1	12894426	12894625	12921037	12921202	12938988	12939200	0.0860043	0.0638416	0.157135	0.555114	0.943411	0
ENSMUSG00000005886.14	Ncoa2	chr1	13150689	13150918	13152378	13152456	13152796	13153075	0.029548	0.0304373	0.0128784	0.206045	0.896772	0
ENSMUSG00000005886.14	Ncoa2	chr1	13150689	13150918	13152796	13153075	13156369	13156535	0.023569	0.161023	0.0190466	0.767509	0.996531	0
ENSMUSG00000005886.14	Ncoa2	chr1	13162072	13162288	13164895	13165102	13166895	13167106	0.0341446	0.0402757	0.117681	0.703061	0.975015	0
ENSMUSG00000005886.14	Ncoa2	chr1	13224608	13224713	13285968	13286025	13299662	13299722	0.0315568	0.0483658	0.0833211	0.656069	0.963886	0
ENSMUSG00000005886.14	Ncoa2	chr1	13285968	13286025	13299662	13299722	13373937	13374029	0.0695853	0.0571938	0.0135483	0.121026	0.896772	0
ENSMUSG00000025935.10	Tram1	chr1	13579449	13579566	13579689	13579811	13581022	13581086	0.00340208	0.00398263	0	0.235682	0.896772	0
ENSMUSG00000025935.10	Tram1	chr1	13581022	13581086	13582464	13582633	13589599	13589875	0.0115151	0.0141828	0	0.253257	0.896772	0
ENSMUSG00000025937.6	Lactb2	chr1	13623329	13626904	13627355	13627437	13630064	13630213	0.0312232	0.0244237	0.0293544	0.28539	0.896772	0
ENSMUSG00000025932.14	Eya1	chr1	14283120	14283198	14302769	14302897	14304424	14304474	1.11022e-16	0.16727	1.11022e-16	0.941209	0.999593	0
ENSMUSG00000025920.19	Stau2	chr1	16228815	16229866	16231002	16231091	16345703	16346011	1.11022e-16	0.223297	0	0.91553	0.999593	0
ENSMUSG00000025920.19	Stau2	chr1	16463034	16463194	16486019	16486150	16509341	16509408	0.0761858	0.13325	0.0621334	0.469966	0.930278	0
ENSMUSG00000025920.19	Stau2	chr1	16463034	16463194	16486019	16486165	16509341	16509408	0.448086	0.0981064	0.0176662	0.0014571	0.896772	0
ENSMUSG00000025939.19	Ube2w	chr1	16585275	16585352	16597950	16598053	16602261	16602353	0.0416667	0.0309295	0.0336718	0.236486	0.896772	0
ENSMUSG00000025939.19	Ube2w	chr1	16585275	16585431	16597950	16598053	16602261	16602353	0.0267811	0.0930683	0.00786886	0.630261	0.956967	0
ENSMUSG00000079658.9	Eloc	chr1	16643471	16643478	16645685	16645829	16647954	16648007	0.00285475	0.0270008	0.0244633	0.906879	0.999593	0
ENSMUSG00000079658.9	Eloc	chr1	16645685	16645829	16646987	16647053	16647954	16648007	0.000555981	0.0131921	0.00879928	0.953449	0.999593	0
ENSMUSG00000043760.16	Pkhd1	chr1	20211836	20211991	20219523	20219646	20220038	20220126	0.00529616	0.0132176	0.0403687	0.888562	0.999593	0
ENSMUSG00000043760.16	Pkhd1	chr1	20350412	20350545	20351315	20351419	20358839	20358974	0.0174998	0.0486862	0.0488154	0.709017	0.977691	0
ENSMUSG00000043760.16	Pkhd1	chr1	20391464	20391622	20392011	20392219	20414220	20414433	0.00336602	0.0774465	0.095313	0.961737	0.999593	0
ENSMUSG00000043760.16	Pkhd1	chr1	20450220	20450377	20502941	20503092	20508892	20509112	0.0301929	0.0648207	0.0620708	0.625305	0.955137	0
ENSMUSG00000043760.16	Pkhd1	chr1	20502941	20503092	20508892	20509112	20520153	20520297	0.0585395	0.0991803	0.0331864	0.39533	0.922092	0
ENSMUSG00000043760.16	Pkhd1	chr1	20534535	20534731	20535645	20535755	20537272	20537408	0.00249147	0.0411413	0.00782821	0.946985	0.999593	0
ENSMUSG00000043760.16	Pkhd1	chr1	20534535	20534731	20535649	20535755	20537272	20537408	0.0140132	0.014802	0.0218658	0.481117	0.930511	0
ENSMUSG00000043760.16	Pkhd1	chr1	20547349	20547544	20548090	20548196	20549685	20549808	0.000679206	0.071364	0.0408248	0.976308	0.999593	0
ENSMUSG00000043760.16	Pkhd1	chr1	20559420	20559548	20559861	20559933	20562359	20562502	0.0195039	0.037967	0.0126566	0.467039	0.930278	0
ENSMUSG00000043760.16	Pkhd1	chr1	20585646	20585711	20586823	20586838	20588484	20588563	0.222096	0.0845893	0.179481	0.238031	0.896772	0
ENSMUSG00000043760.16	Pkhd1	chr1	20585646	20585711	20586823	20586898	20588484	20588563	0.00266161	0.00354152	0.0109206	0.765469	0.995659	0
ENSMUSG00000043760.16	Pkhd1	chr1	20593910	20593968	20608318	20608427	20612701	20612843	0.00854189	0.0371019	0.0297964	0.784335	0.999593	0
ENSMUSG00000043760.16	Pkhd1	chr1	20613394	20613472	20615268	20615405	20617910	20618040	0.0143475	0.0189277	0	0.281365	0.896772	0
ENSMUSG00000043760.16	Pkhd1	chr1	20615268	20615405	20617544	20617788	20617910	20618040	0.00223966	0.0222265	0.0221492	0.916559	0.999593	0
ENSMUSG00000041779.5	Tram2	chr1	21013401	21013511	21037396	21037460	21078993	21079229	0.0638673	0.0516665	0.116757	0.516299	0.933084	0
ENSMUSG00000026155.13	Smap1	chr1	23866216	23866297	23871437	23871518	23876373	23876449	0.00318263	0.00318392	0	0.181818	0.896772	0
ENSMUSG00000026155.13	Smap1	chr1	23877708	23877794	23891859	23891993	23922037	23922166	0.0143034	0.0115302	0.00242992	0.118797	0.896772	0
ENSMUSG00000026153.15	Fam135a	chr1	24014778	24014892	24020674	24020785	24021853	24022005	0.0105664	0.0109727	0	0.194047	0.896772	0
ENSMUSG00000026153.15	Fam135a	chr1	24028721	24029940	24030741	24030896	24032662	24032736	0.119896	0.0997144	0.0855395	0.202598	0.896772	0
ENSMUSG00000026153.15	Fam135a	chr1	24028199	24030528	24030741	24030896	24032662	24032736	0.0819139	0.0965845	0.0252294	0.231045	0.896772	0
ENSMUSG00000026153.15	Fam135a	chr1	24032662	24032736	24042948	24043024	24044113	24044269	0.00838251	0.0332091	0.00877395	0.71785	0.980221	0
ENSMUSG00000026153.15	Fam135a	chr1	24032662	24032736	24044113	24044269	24046357	24046407	0.00689803	0.0307816	0.0164003	0.753985	0.992105	0
ENSMUSG00000026153.15	Fam135a	chr1	24046357	24046407	24049129	24049207	24053182	24053336	0.0195603	0.0371094	0.0215581	0.485187	0.930962	0
ENSMUSG00000026153.15	Fam135a	chr1	24086519	24086611	24098630	24098719	24100060	24100182	0.0122953	0.0271059	0.01275	0.521522	0.934498	0
ENSMUSG00000048874.15	Phf3	chr1	30802341	30805942	30806168	30806364	30808722	30808812	0.011523	0	0.00833203	0.189703	0.896772	0
ENSMUSG00000048874.15	Phf3	chr1	30811903	30811967	30813016	30813152	30813959	30814091	0.0435662	0.0416329	0	0.170547	0.896772	0
ENSMUSG00000048874.15	Phf3	chr1	30824227	30824519	30829842	30831559	30837104	30837266	0.0189807	0.0356944	0.0207004	0.493766	0.930962	0
ENSMUSG00000048874.15	Phf3	chr1	30824209	30824519	30830800	30831559	30837104	30837266	0.18479	0.166853	0.105284	0.186857	0.896772	0
ENSMUSG00000042215.8	Bag2	chr1	33746801	33747016	33748216	33748326	33757578	33757741	0.111177	0.138889	0.0156421	0.251799	0.896772	0
ENSMUSG00000042197.13	Zfp451	chr1	33761544	33762209	33764513	33764569	33765843	33765909	0.0400073	0.0212261	0.0251109	0.139336	0.896772	0
ENSMUSG00000042197.13	Zfp451	chr1	33765843	33765909	33769720	33769907	33770768	33770899	0.116434	0.107933	0	0.160904	0.896772	0
ENSMUSG00000042197.13	Zfp451	chr1	33770768	33770899	33772892	33773033	33776268	33777863	0.224334	0	0.0960347	0.0888178	0.896772	0
ENSMUSG00000042197.13	Zfp451	chr1	33779188	33779191	33779895	33780049	33782067	33782194	0.00308642	0.144338	0.0629509	0.987115	0.999593	0
ENSMUSG00000042197.13	Zfp451	chr1	33783040	33783191	33783852	33783964	33786406	33786532	0.115711	0.0815565	0	0.0927691	0.896772	0
ENSMUSG00000042197.13	Zfp451	chr1	33783852	33783964	33786406	33786532	33805338	33805389	0.0503233	0.0674947	0.0283992	0.310298	0.896772	0
ENSMUSG00000042197.13	Zfp451	chr1	33786453	33786532	33801368	33803613	33805338	33805389	0.00791132	0.022734	0.0869374	0.942684	0.999593	0
ENSMUSG00000042197.13	Zfp451	chr1	33786453	33786532	33801720	33803613	33805338	33805389	0.0147487	0	0.0130574	0.25022	0.896772	0
ENSMUSG00000042197.13	Zfp451	chr1	33805338	33805419	33810411	33810644	33813726	33813810	0.00387991	0.00784704	0.00575887	0.550598	0.943411	0
ENSMUSG00000037503.12	Fam168b	chr1	34819866	34820009	34824019	34824055	34828766	34828847	0.0185206	0.0113774	0.0132677	0.182631	0.896772	0
ENSMUSG00000037503.12	Fam168b	chr1	34819866	34820009	34828766	34828847	34836732	34836813	0.0077809	0.00509673	0.0100855	0.394329	0.920912	0
ENSMUSG00000037503.12	Fam168b	chr1	34819866	34820009	34836732	34836813	34842827	34843013	1.11022e-16	0	0.163299	0.954615	0.999593	0
ENSMUSG00000037503.12	Fam168b	chr1	34828766	34828847	34836732	34836813	34842827	34842964	0.0104382	0.00748631	0.00516136	0.124398	0.896772	0
ENSMUSG00000037503.12	Fam168b	chr1	34836732	34836813	34837606	34837669	34842827	34842964	0.00206451	0.00503961	0.00564446	0.697991	0.973174	0
ENSMUSG00000037503.12	Fam168b	chr1	34836732	34836813	34837606	34837680	34842827	34842964	0.00155039	0.00398173	0.00287204	0.633753	0.958373	0
ENSMUSG00000037470.14	Uggt1	chr1	36176232	36176327	36176775	36176799	36177517	36177588	0.0984501	0.0684082	0.029283	0.0889976	0.896772	0
ENSMUSG00000037470.14	Uggt1	chr1	36202778	36202878	36207941	36208042	36209985	36210030	0.00724915	0.00852153	0	0.237356	0.896772	0
ENSMUSG00000047180.8	Neurl3	chr1	36268655	36268709	36268982	36269101	36269212	36269701	0.00101781	0.0101315	0.00826256	0.905161	0.999593	0
ENSMUSG00000010453.12	Kansl3	chr1	36335729	36336294	36337461	36337651	36343250	36343384	0.029212	0.163414	0.0236068	0.838894	0.999593	0
ENSMUSG00000010453.12	Kansl3	chr1	36335729	36336294	36337604	36337651	36343250	36343384	0.0390865	0.150884	0.0780252	0.758717	0.993986	0
ENSMUSG00000010453.12	Kansl3	chr1	36345837	36346029	36347216	36347294	36348524	36348681	0.00239577	0.0164819	0.012847	0.859772	0.999593	0
ENSMUSG00000010453.12	Kansl3	chr1	36348817	36349018	36349401	36349465	36351632	36351790	0.00073518	0.00669346	0.0068471	0.91099	0.999593	0
ENSMUSG00000010453.12	Kansl3	chr1	36351632	36351790	36351925	36352000	36353593	36353665	0.0267104	0.0168499	0.00506173	0.066428	0.896772	0
ENSMUSG00000010453.12	Kansl3	chr1	36353771	36353873	36354097	36354161	36354648	36354780	0.0922181	0.0684542	0.0554594	0.163541	0.896772	0
ENSMUSG00000010453.12	Kansl3	chr1	36353771	36353873	36354097	36354214	36354648	36354780	0.00260073	0.0111029	0.00538748	0.741071	0.986996	0
ENSMUSG00000001143.13	Lman2l	chr1	36428299	36428461	36429422	36429455	36438749	36438832	0.00750751	0.0351091	0.0392837	0.838494	0.999593	0
ENSMUSG00000001143.13	Lman2l	chr1	36428391	36428461	36438749	36438832	36439608	36439668	0.0165146	0.111915	0.0291606	0.791831	0.999593	0
ENSMUSG00000026121.13	Sema4c	chr1	36554251	36554400	36555931	36556077	36558015	36558250	0.0875	0.0649519	0.0707107	0.227863	0.896772	0
ENSMUSG00000026121.13	Sema4c	chr1	36554251	36554400	36555931	36556080	36558015	36558250	0.115	0.246596	0.0548591	0.468776	0.930278	0
ENSMUSG00000026121.13	Sema4c	chr1	36555931	36556077	36556802	36556929	36558015	36558063	0.0388889	0.0288675	0.0831479	0.596608	0.949438	0
ENSMUSG00000026121.13	Sema4c	chr1	36555931	36556080	36556802	36557085	36558015	36558250	0.12963	0.166667	0.0523783	0.270286	0.896772	0
ENSMUSG00000037351.9	Actr1b	chr1	36702481	36702600	36706544	36706648	36706869	36706945	0.00326686	0.00422564	0.00667408	0.579598	0.946848	0
ENSMUSG00000037351.9	Actr1b	chr1	36702481	36702600	36706869	36706945	36709805	36709919	0.00472763	0.00350935	0.0862153	0.919811	0.999593	0
ENSMUSG00000037351.9	Actr1b	chr1	36706869	36706945	36708190	36708255	36709805	36709919	0.010114	0.00508692	0.00881513	0.241568	0.896772	0
ENSMUSG00000026116.11	Tmem131	chr1	36815454	36815521	36815886	36815996	36816108	36816247	0.0121368	0.0065608	0.011744	0.280267	0.896772	0
ENSMUSG00000026116.11	Tmem131	chr1	36823066	36823153	36824404	36824588	36824715	36824781	0.0104217	0	0.0112073	0.318124	0.897575	0
ENSMUSG00000026112.7	Coa5	chr1	37417083	37420627	37428341	37428425	37429868	37430103	0.00908936	0.00172515	0.00748455	0.225192	0.896772	0
ENSMUSG00000026110.15	Mgat4a	chr1	37444806	37444919	37449095	37449162	37450328	37450392	0.0529013	0.0309864	0	0.0597556	0.896772	0
ENSMUSG00000026110.15	Mgat4a	chr1	37444806	37444919	37450328	37450392	37452230	37452424	0	0.102062	0	0.965847	0.999593	0
ENSMUSG00000026110.15	Mgat4a	chr1	37444806	37444919	37450328	37450407	37452230	37452424	0	0.102062	0	0.965847	0.999593	0
ENSMUSG00000026110.15	Mgat4a	chr1	37449095	37449162	37450328	37450392	37452230	37452424	0.0291402	0.0793376	0.0754247	0.698554	0.973303	0
ENSMUSG00000026110.15	Mgat4a	chr1	37449095	37449162	37450328	37450407	37452230	37452424	0.00217037	0.00609292	0.00592962	0.710463	0.978231	0
ENSMUSG00000026110.15	Mgat4a	chr1	37452521	37452629	37454743	37454874	37456589	37456704	0.004515	0.00806632	0.00653432	0.523028	0.93456	0
ENSMUSG00000026090.16	2010300C02Rik	chr1	37623760	37626068	37628216	37628426	37631320	37631482	0.0330303	0.0218531	0.0236215	0.19019	0.896772	0
ENSMUSG00000026090.16	2010300C02Rik	chr1	37644560	37644640	37676341	37676779	37719569	37719610	0.00476892	0.00870605	0.009729	0.606281	0.95036	0
ENSMUSG00000026088.15	Mitd1	chr1	37879264	37879363	37879559	37879620	37880932	37881048	0.0477802	0.0619911	0.0193061	0.280549	0.896772	0
ENSMUSG00000058407.12	Txndc9	chr1	37987639	37987779	37990202	37990457	37993991	37994110	0.000497009	0.00410439	0.00264834	0.875251	0.999593	0
ENSMUSG00000026082.11	Rev1	chr1	38074314	38074443	38074898	38075023	38079289	38079398	0.108472	0.0900127	0.0876583	0.231715	0.896772	0
ENSMUSG00000026082.11	Rev1	chr1	38079289	38079398	38081158	38081358	38083703	38083783	0.177383	0.167747	0.0707107	0.153993	0.896772	0
ENSMUSG00000026082.11	Rev1	chr1	38108403	38108467	38121132	38121209	38129461	38129662	0.00959809	0.0117482	0	0.251108	0.896772	0
ENSMUSG00000026082.11	Rev1	chr1	38108403	38108467	38128251	38128315	38129461	38129662	0.00812888	0.0264408	0.0129324	0.675412	0.967105	0
ENSMUSG00000026082.11	Rev1	chr1	38108403	38108467	38128305	38128315	38129461	38129662	0.037035	0.0429838	0.0606532	0.512634	0.931723	0
ENSMUSG00000048234.13	Rnf149	chr1	39555604	39555670	39558314	39558411	39560692	39560775	0.00810034	0.0818599	0.112928	0.922103	0.999593	0
ENSMUSG00000041945.12	Mfsd9	chr1	40786166	40786210	40787529	40787617	40790484	40790657	0.0108059	0.0142751	0.0269374	0.63985	0.960009	0
ENSMUSG00000070939.9	Tgfbrap1	chr1	43059890	43060221	43062516	43062599	43067473	43067628	0.0192168	0.0846638	0.0473141	0.744566	0.988399	0
ENSMUSG00000070939.9	Tgfbrap1	chr1	43071495	43071655	43075250	43075952	43092380	43092447	0.0536329	0.0620237	0.0291249	0.258722	0.896772	0
ENSMUSG00000070939.9	Tgfbrap1	chr1	43075615	43075952	43079726	43079826	43092380	43092447	0.0445187	0.0348794	0.0481031	0.329374	0.900193	0
ENSMUSG00000008136.14	Fhl2	chr1	43131763	43131821	43137008	43138343	43141697	43141872	0.00326437	0.00515009	0.00156094	0.364954	0.910296	0
ENSMUSG00000008136.14	Fhl2	chr1	43141697	43141872	43153075	43153254	43163701	43163961	0.0106991	0.0210121	0.0329654	0.715389	0.979244	0
ENSMUSG00000057363.12	Uxs1	chr1	43780117	43780169	43790463	43790550	43797244	43797305	0.0640783	0.0475658	0.0517831	0.228452	0.896772	0
ENSMUSG00000057363.12	Uxs1	chr1	43780117	43780169	43790463	43790644	43797244	43797305	0.0178502	0.0574712	0.00927119	0.622035	0.954271	0
ENSMUSG00000057363.12	Uxs1	chr1	43797244	43797305	43802531	43802624	43805352	43805396	0.00537672	0.0158932	0.00514885	0.619655	0.954009	0
ENSMUSG00000057363.12	Uxs1	chr1	43805625	43805674	43807349	43807377	43827614	43827741	0.00282604	0.00936244	0.00211905	0.643515	0.961179	0
ENSMUSG00000057363.12	Uxs1	chr1	43807349	43807377	43816875	43816964	43827614	43827741	0.000526736	0.00282093	0.00155836	0.800562	0.999593	0
ENSMUSG00000026049.11	Tex30	chr1	44088507	44088527	44091182	44091212	44091360	44091591	0.0622537	0.075607	0	0.243911	0.896772	0
ENSMUSG00000025986.6	Slc39a10	chr1	46811985	46812176	46818062	46818143	46819064	46819433	0.0284639	0.0483176	0.025713	0.429594	0.930278	0
ENSMUSG00000026107.11	Nabp1	chr1	51472328	51472380	51473005	51473081	51474533	51474605	0.0907305	0.0224739	0.0435796	0.0867629	0.896772	0
ENSMUSG00000018417.14	Myo1b	chr1	51755642	51755770	51755876	51755921	51757104	51757257	0.00368379	0.00698408	0.0109121	0.701148	0.974774	0
ENSMUSG00000018417.14	Myo1b	chr1	51763889	51763964	51766821	51766908	51769003	51769090	0.0745818	0.0917411	0.0903616	0.407128	0.922474	0
ENSMUSG00000018417.14	Myo1b	chr1	51763889	51763964	51766821	51768736	51769003	51769090	0.0255005	0.0329376	0.0264579	0.381509	0.914093	0
ENSMUSG00000018417.14	Myo1b	chr1	51766821	51766908	51768649	51768736	51769003	51769090	0.0271006	0.00305662	0.012382	0.0834445	0.896772	0
ENSMUSG00000018417.14	Myo1b	chr1	51774311	51774405	51776203	51776340	51778320	51778547	0.0461188	0.0985349	0.0372696	0.514738	0.932361	0
ENSMUSG00000018417.14	Myo1b	chr1	51774311	51774405	51776203	51776404	51778320	51778547	0.00753722	0.00685937	0.00479394	0.207639	0.896772	0
ENSMUSG00000026103.14	Gls	chr1	52199854	52199887	52200617	52200651	52204345	52204516	0.00819497	0.0733737	0.142392	0.90495	0.999593	0
ENSMUSG00000026103.14	Gls	chr1	52199854	52199887	52204345	52204516	52207300	52207359	0.000932503	0.0245364	0.0267535	0.972078	0.999593	0
ENSMUSG00000026103.14	Gls	chr1	52215564	52215694	52219487	52219609	52219942	52220039	0.0406574	0.0317802	0.0180135	0.12866	0.896772	0
ENSMUSG00000002881.14	Nab1	chr1	52464784	52464947	52466889	52466979	52489920	52490736	0.0486111	0.0360844	0.103935	0.571304	0.946564	0
ENSMUSG00000026102.9	Inpp1	chr1	52794469	52794670	52797040	52797101	52799284	52799488	0.0111542	0.0906306	0.0546194	0.888871	0.999593	0
ENSMUSG00000026098.13	Pms1	chr1	53281946	53282092	53290378	53290423	53296885	53296967	0.0245635	0.0720984	0.0650213	0.711385	0.978451	0
ENSMUSG00000026094.14	Stk17b	chr1	53761148	53761161	53762588	53762637	53764031	53764158	0.0260114	0.0509985	0.0485137	0.594471	0.948449	0
ENSMUSG00000026094.14	Stk17b	chr1	53771609	53771822	53776516	53776679	53785073	53785157	0.0499108	0.0396327	0.047558	0.293168	0.896772	0
ENSMUSG00000041303.7	Gtf3c3	chr1	54420395	54420499	54423500	54423573	54424008	54424054	0.0447776	0.0644127	0.0325107	0.355582	0.905807	0
ENSMUSG00000073678.4	Pgap1	chr1	54530853	54530959	54532021	54532088	54533418	54533469	0.00580225	0.00809639	0.00272488	0.315739	0.896772	0
ENSMUSG00000025982.13	Sf3b1	chr1	55014482	55014562	55014868	55014924	55016375	55016490	0.00699338	0.0128955	0.0182266	0.665826	0.965627	0
ENSMUSG00000025982.13	Sf3b1	chr1	55014868	55014924	55016128	55016182	55016375	55016490	0.00223349	0.0182428	0.0185874	0.900659	0.999593	0
ENSMUSG00000025980.14	Hspd1	chr1	55080101	55080347	55081072	55081172	55081659	55081828	0.000455894	0.00385145	0.00378943	0.901799	0.999593	0
ENSMUSG00000025980.14	Hspd1	chr1	55080101	55080347	55081072	55081189	55081659	55081828	0.291667	0.216506	0.235702	0.265723	0.896772	0
ENSMUSG00000025978.14	Rftn2	chr1	55211149	55211261	55214119	55214303	55226120	55226782	0	0	0.125615	0.965969	0.999593	0
ENSMUSG00000038331.15	Satb2	chr1	56898990	56899117	56948078	56948255	56969652	56969880	0.0583333	0.0829156	0	0.313099	0.896772	0
ENSMUSG00000048495.16	Tyw5	chr1	57391448	57391536	57393349	57394091	57396726	57396796	0.0555556	0.123718	0.0224478	0.490758	0.930962	0
ENSMUSG00000048495.16	Tyw5	chr1	57393349	57393487	57393584	57393694	57394046	57394091	0.0144033	0	0.0162017	0.334416	0.900823	0
ENSMUSG00000048495.16	Tyw5	chr1	57393349	57393487	57393669	57393694	57394046	57394091	0.0277778	0	0.0312461	0.333352	0.900193	0
ENSMUSG00000054770.16	Kctd18	chr1	57961900	57961995	57963067	57963261	57965328	57965540	0.0555556	0.136775	0.0673435	0.563669	0.945192	0
ENSMUSG00000026034.17	Clk1	chr1	58414371	58414501	58414589	58414684	58417012	58417179	0.0101693	0.014645	0	0.315846	0.896772	0
ENSMUSG00000026034.17	Clk1	chr1	58414614	58414684	58417012	58417179	58417266	58417383	0.00461675	0.0193216	0.00894014	0.732147	0.984738	0
ENSMUSG00000026034.17	Clk1	chr1	58419666	58419733	58420120	58420208	58421082	58421239	0.0600812	0.117046	0.120359	0.597379	0.949622	0
ENSMUSG00000026034.17	Clk1	chr1	58419666	58419733	58420120	58420211	58421082	58421239	0.00387816	0.0258185	0.00680317	0.825273	0.999593	0
ENSMUSG00000026035.15	Ppil3	chr1	58442524	58442599	58444588	58444639	58445145	58445176	0.0289457	0.0140899	0.0138778	0.0819547	0.896772	0
ENSMUSG00000026037.14	Orc2	chr1	58483697	58483703	58492856	58492888	58493660	58493750	0.0242528	0.0354684	0	0.322698	0.897844	0
ENSMUSG00000026037.14	Orc2	chr1	58497375	58497465	58500240	58500384	58501322	58501416	0.0107869	0.00817005	0.0219258	0.563325	0.945192	0
ENSMUSG00000026037.14	Orc2	chr1	58501322	58501426	58501841	58501884	58504771	58504925	0.0537334	0.108087	0.0804455	0.566174	0.945622	0
ENSMUSG00000026037.14	Orc2	chr1	58501322	58501426	58501841	58501890	58504771	58504925	0.0173986	0.030878	0.0256941	0.52821	0.937281	0
ENSMUSG00000038174.14	Fam126b	chr1	58529082	58530259	58534484	58534652	58535389	58535549	0.167524	0.0594941	0.173541	0.282506	0.896772	0
ENSMUSG00000038174.14	Fam126b	chr1	58552186	58552329	58557271	58557373	58557976	58558057	0.0163354	0.0844903	0.0236214	0.751395	0.991285	0
ENSMUSG00000038174.14	Fam126b	chr1	58557976	58558057	58562639	58562787	58565856	58565954	0.0174503	0.0329468	0.00785674	0.4367	0.930278	0
ENSMUSG00000038174.14	Fam126b	chr1	58557976	58558057	58565767	58565954	58586211	58586264	0.0777778	0.057735	0.0628539	0.228487	0.896772	0
ENSMUSG00000038174.14	Fam126b	chr1	58557976	58558057	58565856	58565954	58586211	58586264	0.0231992	0.0276974	0	0.243767	0.896772	0
ENSMUSG00000026028.12	Trak2	chr1	58903503	58904182	58906705	58906811	58908522	58908789	0.0167722	0	0.0118604	0.18352	0.896772	0
ENSMUSG00000026028.12	Trak2	chr1	58921679	58921889	58922603	58922682	58923521	58923638	0.0165057	0.0336706	0.0153719	0.499367	0.930962	0
ENSMUSG00000026028.12	Trak2	chr1	58926662	58926727	58935745	58935829	58946246	58946337	0	0.253508	0	0.876276	0.999593	0
ENSMUSG00000026028.12	Trak2	chr1	58926662	58926727	58935745	58935940	58946246	58946337	0.0933228	0.0551851	0.00847847	0.0594719	0.896772	0
ENSMUSG00000026028.12	Trak2	chr1	58926662	58926727	58935745	58935957	58946246	58946337	0	0.0544331	0	0.967051	0.999593	0
ENSMUSG00000026024.14	Als2	chr1	59215650	59216021	59217926	59218081	59220374	59220452	0.0110991	0.0184352	0.0263405	0.635788	0.959244	0
ENSMUSG00000026021.15	Sumo1	chr1	59642417	59642489	59644516	59644594	59655457	59655532	0.0017864	0.00533437	0.00172412	0.618445	0.953627	0
ENSMUSG00000026021.15	Sumo1	chr1	59655457	59655532	59667190	59667263	59670679	59670739	0.00134267	0.000853227	0.00259548	0.545073	0.942381	0
ENSMUSG00000026014.15	Raph1	chr1	60483235	60483340	60488199	60490321	60493537	60493680	0.536592	0.106531	0.217534	0.0757791	0.896772	0
ENSMUSG00000026014.15	Raph1	chr1	60488199	60490321	60491459	60491535	60493537	60493680	0.00376826	0.0105782	0.0075461	0.663567	0.965279	0
ENSMUSG00000026014.15	Raph1	chr1	60500554	60500620	60501755	60501877	60502824	60502984	0.00341466	0.0226398	0.0245227	0.882224	0.999593	0
ENSMUSG00000026014.15	Raph1	chr1	60500554	60500620	60501755	60501900	60502824	60502984	0.17716	0.133654	0.143167	0.253184	0.896772	0
ENSMUSG00000026014.15	Raph1	chr1	60501755	60501877	60502824	60502984	60503517	60503595	0.00809562	0.0144822	0.0271964	0.732266	0.984754	0
ENSMUSG00000026014.15	Raph1	chr1	60503517	60503595	60510416	60510491	60518979	60519060	0.0121528	0.0090211	0.00982093	0.235149	0.896772	0
ENSMUSG00000026014.15	Raph1	chr1	60503517	60503595	60518979	60519060	60525591	60526097	0.00437468	0.0192331	0.0200973	0.819477	0.999593	0
ENSMUSG00000040865.15	Ino80d	chr1	63085667	63086398	63092022	63092064	63093284	63093440	0.00635919	0.00413847	0.00318788	0.111784	0.896772	0
ENSMUSG00000025968.16	Ndufs1	chr1	63147289	63147424	63148395	63148571	63149956	63150111	0.0292519	0.0311217	0	0.202563	0.896772	0
ENSMUSG00000025968.16	Ndufs1	chr1	63164729	63164895	63166290	63166367	63169228	63169336	0	0.0480292	0	0.984353	0.999593	0
ENSMUSG00000025968.16	Ndufs1	chr1	63166290	63166367	63169228	63169336	63170049	63170141	0.00461634	0.00518578	0.0107627	0.616358	0.952402	0
ENSMUSG00000025968.16	Ndufs1	chr1	63170852	63170914	63172153	63172257	63175636	63175688	0	0.22845	0	0.904415	0.999593	0
ENSMUSG00000025968.16	Ndufs1	chr1	63170852	63170914	63172153	63172257	63176427	63176524	0.0137185	0.128965	0.00851067	0.928486	0.999593	0
ENSMUSG00000025968.16	Ndufs1	chr1	63170852	63170914	63172153	63172257	63176585	63176667	0.0776201	0.0602983	0.0298594	0.11818	0.896772	0
ENSMUSG00000025968.16	Ndufs1	chr1	63170852	63170914	63175636	63175688	63176427	63176524	0.0114958	0.0114973	0	0.181731	0.896772	0
ENSMUSG00000025968.16	Ndufs1	chr1	63170848	63170914	63175636	63176331	63176427	63176524	0.0266608	0.0174552	0	0.0767454	0.896772	0
ENSMUSG00000025968.16	Ndufs1	chr1	63172153	63172257	63175636	63175688	63176427	63176524	0.108333	0.0268055	0.0809057	0.176346	0.896772	0
ENSMUSG00000025959.13	Klf7	chr1	64079102	64079334	64120899	64121139	64122201	64122282	0	0.116646	0	0.956431	0.999593	0
ENSMUSG00000051344.13	Plekhm3	chr1	64819935	64820093	64861186	64861250	64883128	64883322	0.027904	0.0957483	0.0605497	0.696593	0.973015	0
ENSMUSG00000051344.13	Plekhm3	chr1	64861186	64861250	64883128	64883322	64892751	64892897	0.0159982	0.038207	0.00857099	0.525808	0.936305	0
ENSMUSG00000026004.15	Kansl1l	chr1	66719362	66721006	66721804	66721973	66723262	66723375	0.0164853	0.015576	0.0243347	0.456839	0.930278	0
ENSMUSG00000026004.15	Kansl1l	chr1	66726686	66726805	66728443	66728575	66735636	66735744	0.0524739	0.102521	0.0888378	0.577283	0.946848	0
ENSMUSG00000026004.15	Kansl1l	chr1	66726686	66726805	66728443	66730471	66735636	66735744	0.175962	0.114367	0	0.0730918	0.896772	0
ENSMUSG00000026004.15	Kansl1l	chr1	66726686	66726805	66734236	66734319	66735636	66735744	0.0448718	0.0111029	0.0725238	0.477841	0.930278	0
ENSMUSG00000026004.15	Kansl1l	chr1	66726686	66726808	66728443	66728575	66735636	66735744	0.0953457	0.0601353	0.0692349	0.178489	0.896772	0
ENSMUSG00000026004.15	Kansl1l	chr1	66726686	66726808	66728443	66730471	66735636	66735744	0.0273254	0.0198632	0	0.0963456	0.896772	0
ENSMUSG00000026004.15	Kansl1l	chr1	66801048	66802168	66807524	66807604	66817373	66817546	0.0625286	0.0550447	0.0370459	0.186123	0.896772	0
ENSMUSG00000026003.5	Acadl	chr1	66857398	66857554	66862269	66862888	66863172	66863277	0.00350557	0.00371709	0	0.200753	0.896772	0
ENSMUSG00000026000.16	Lancl1	chr1	67009227	67009374	67009910	67010046	67020857	67021065	0.0445359	0.0221889	0.0669359	0.447332	0.930278	0
ENSMUSG00000062209.15	Erbb4	chr1	68290242	68290317	68290438	68290483	68298286	68298441	1.38778e-17	0.114627	1.38778e-17	0.93447	0.999593	0
ENSMUSG00000025997.13	Ikzf2	chr1	69538767	69539492	69542226	69542370	69548598	69548736	0.0209633	0.0585152	0.0181309	0.588256	0.948071	0
ENSMUSG00000025997.13	Ikzf2	chr1	69684123	69684172	69685693	69685797	69687040	69687140	0.0223958	0.111019	0.11997	0.83439	0.999593	0
ENSMUSG00000026196.7	Bard1	chr1	71047639	71047772	71053612	71053721	71065478	71065651	0.0179487	0.0629643	0.0632248	0.771677	0.998103	0
ENSMUSG00000026193.15	Fn1	chr1	71586860	71586943	71588368	71590204	71590766	71590831	0.0116667	0.0165831	0	0.30896	0.896772	0
ENSMUSG00000026193.15	Fn1	chr1	71586911	71586943	71590097	71590204	71590766	71590831	0.000790625	0.00111347	0.000461553	0.330017	0.900193	0
ENSMUSG00000026193.15	Fn1	chr1	71590767	71590892	71590982	71591121	71593070	71593231	1.34009e-05	9.53195e-05	4.13472e-05	0.83936	0.999593	0
ENSMUSG00000026193.15	Fn1	chr1	71590852	71590892	71591619	71593235	71595663	71595802	0.00108661	0.00281177	0.000759106	0.563471	0.945192	0
ENSMUSG00000026193.15	Fn1	chr1	71590852	71590892	71591619	71593235	71598373	71598463	0.00179393	0.00446405	0.00110788	0.547097	0.94303	0
ENSMUSG00000026193.15	Fn1	chr1	71590852	71590892	71593070	71593231	71595663	71595802	0.0335174	0.0326293	0.0131	0.178931	0.896772	0
ENSMUSG00000026193.15	Fn1	chr1	71590852	71590892	71593070	71593235	71595663	71595802	0.00295044	0.00110018	0.00184255	0.136157	0.896772	0
ENSMUSG00000026193.15	Fn1	chr1	71590767	71590892	71593070	71593235	71595697	71595802	0	0	0.268488	0.919536	0.999593	0
ENSMUSG00000026193.15	Fn1	chr1	71590852	71590892	71593070	71593235	71597280	71597387	0.0328167	0.408329	0.0962048	0.934979	0.999593	0
ENSMUSG00000026193.15	Fn1	chr1	71590852	71590892	71593070	71593235	71598373	71598463	0.033191	0.014716	0.00750227	0.0233955	0.896772	0
ENSMUSG00000026193.15	Fn1	chr1	71590852	71590892	71593070	71593510	71595663	71595802	0.00421161	0.0485145	0.0225132	0.881467	0.999593	0
ENSMUSG00000026193.15	Fn1	chr1	71590852	71590892	71593070	71593510	71597280	71597387	0.0894097	0.0663695	0.170196	0.572426	0.946564	0
ENSMUSG00000026193.15	Fn1	chr1	71590852	71590892	71595663	71595802	71597280	71597387	0.0206132	0.0137029	0.0123083	0.146891	0.896772	0
ENSMUSG00000026193.15	Fn1	chr1	71590767	71590892	71595697	71595802	71597280	71597387	0.120292	0.0892936	0.257195	0.623869	0.954493	0
ENSMUSG00000026193.15	Fn1	chr1	71590767	71590892	71595697	71595932	71597280	71597387	0.0577257	0.0428502	0.123423	0.603384	0.950077	0
ENSMUSG00000026193.15	Fn1	chr1	71590852	71590892	71597280	71597387	71598373	71598463	0.0344932	0.0214363	0.024639	0.178199	0.896772	0
ENSMUSG00000026193.15	Fn1	chr1	71590852	71590892	71597280	71597672	71598373	71598463	0.0344932	0.0214363	0.024639	0.178199	0.896772	0
ENSMUSG00000026193.15	Fn1	chr1	71590852	71590892	71597280	71597747	71598373	71598463	0.0344932	0.0214363	0.024639	0.178199	0.896772	0
ENSMUSG00000026193.15	Fn1	chr1	71590767	71590892	71597280	71598463	71599214	71599394	0.0360082	0.0267292	0.0622067	0.509235	0.931695	0
ENSMUSG00000026193.15	Fn1	chr1	71590767	71590892	71598373	71598463	71599214	71599394	0.0212845	0.0338835	0.00221057	0.357093	0.906027	0
ENSMUSG00000026193.15	Fn1	chr1	71590767	71590892	71598373	71598597	71599214	71599394	0.00589301	0.0533246	0.0554594	0.913075	0.999593	0
ENSMUSG00000026193.15	Fn1	chr1	71590767	71590892	71598373	71598961	71599214	71599394	0.037037	0.0274929	0.0149652	0.114172	0.896772	0
ENSMUSG00000026193.15	Fn1	chr1	71593195	71593235	71595663	71595802	71597280	71597387	1.79998e-06	0.00123262	0.00044932	0.997948	0.999593	0
ENSMUSG00000026193.15	Fn1	chr1	71593070	71593235	71595697	71595802	71597280	71597387	0.131422	0.0904011	0.204589	0.513312	0.931723	0
ENSMUSG00000026193.15	Fn1	chr1	71593070	71593235	71595697	71595932	71597280	71597387	0.0692708	0.0296875	0.139948	0.57553	0.946848	0
ENSMUSG00000026193.15	Fn1	chr1	71593195	71593235	71597280	71597387	71598373	71598463	0.117026	0.309081	0.0426837	0.690701	0.971878	0
ENSMUSG00000026193.15	Fn1	chr1	71593195	71593235	71597280	71597672	71598373	71598463	0.117026	0.309081	0.0426837	0.690701	0.971878	0
ENSMUSG00000026193.15	Fn1	chr1	71593195	71593235	71597280	71597747	71598373	71598463	0.117026	0.309081	0.0426837	0.690701	0.971878	0
ENSMUSG00000026193.15	Fn1	chr1	71593195	71593510	71595663	71595802	71597280	71597387	0.0717986	0.0177655	0.0585325	0.219727	0.896772	0
ENSMUSG00000026193.15	Fn1	chr1	71593195	71593557	71595663	71595802	71597280	71597387	1.11022e-16	0	0.222681	0.935471	0.999593	0
ENSMUSG00000026193.15	Fn1	chr1	71597280	71597387	71597641	71597696	71598373	71598463	0.14601	0.0236678	0.0223544	0.00105143	0.861104	0
ENSMUSG00000026193.15	Fn1	chr1	71597280	71597387	71597641	71597747	71598373	71598463	0.0563996	0.0178766	0.0078378	0.00711377	0.896772	0
ENSMUSG00000026193.15	Fn1	chr1	71600386	71600466	71601200	71601288	71602309	71602341	0.00047572	0.00119582	0.000525399	0.573931	0.946802	0
ENSMUSG00000026193.15	Fn1	chr1	71600386	71600466	71602309	71602341	71604969	71605083	1.11022e-16	0	0.230749	0.932742	0.999593	0
ENSMUSG00000026193.15	Fn1	chr1	71600386	71600466	71602309	71602497	71604969	71605083	0.0388889	0.0166667	0.0785674	0.55274	0.943411	0
ENSMUSG00000026193.15	Fn1	chr1	71600386	71600466	71602309	71602528	71604969	71605083	0	0	0.408248	0.863218	0.999593	0
ENSMUSG00000026193.15	Fn1	chr1	71600386	71600466	71602309	71602629	71604969	71605083	0.0243056	0.0180422	0.0785674	0.695423	0.972935	0
ENSMUSG00000026193.15	Fn1	chr1	71602309	71602341	71603659	71603929	71604969	71605083	0.0395608	0.0694741	0.0143194	0.396531	0.922474	0
ENSMUSG00000026193.15	Fn1	chr1	71602309	71602497	71603659	71603929	71604969	71605083	0.0746446	0.016184	0.0139787	0.00309459	0.896772	0
ENSMUSG00000026193.15	Fn1	chr1	71602309	71602528	71603659	71603929	71604969	71605083	1.11022e-16	0	0.249485	0.926279	0.999593	0
ENSMUSG00000026193.15	Fn1	chr1	71602309	71602629	71603659	71603929	71604969	71605083	0.199807	0.089837	0.0695307	0.0413712	0.896772	0
ENSMUSG00000026193.15	Fn1	chr1	71612467	71612650	71613762	71613852	71615359	71615425	0.000910914	0.00351239	0.00367762	0.79532	0.999593	0
ENSMUSG00000026193.15	Fn1	chr1	71612467	71612650	71613762	71613858	71615359	71615551	0.000572505	0.00266792	0.000988268	0.750446	0.99102	0
ENSMUSG00000026193.15	Fn1	chr1	71612467	71612650	71613762	71614035	71615359	71615425	0.00852918	0.00859157	0.00409587	0.203776	0.896772	0
ENSMUSG00000026193.15	Fn1	chr1	71612467	71612650	71613941	71614035	71615359	71615425	0.000136749	0.000336451	8.13187e-05	0.541556	0.941452	0
ENSMUSG00000026193.15	Fn1	chr1	71637357	71637395	71638456	71638585	71640291	71640360	3.48809e-06	0.000854679	5.47072e-05	0.995085	0.999593	0
ENSMUSG00000026193.15	Fn1	chr1	71637357	71637395	71638456	71638622	71640291	71640360	0.0469735	0.025538	0.135789	0.700937	0.974774	0
ENSMUSG00000026193.15	Fn1	chr1	71645642	71645702	71648008	71648146	71649193	71649325	0.000778266	0.000565924	0.000876761	0.345277	0.902233	0
ENSMUSG00000026193.15	Fn1	chr1	71645642	71645702	71648008	71648146	71650561	71650699	1.11022e-16	0	0.0571548	0.981796	0.999593	0
ENSMUSG00000026193.15	Fn1	chr1	71645642	71645702	71649193	71649325	71650561	71650699	0.0577652	0.0428795	0.0253695	0.115476	0.896772	0
ENSMUSG00000026193.15	Fn1	chr1	71648086	71648146	71649193	71649325	71650561	71650699	0.000202185	7.5874e-05	0.000175629	0.239564	0.896772	0
ENSMUSG00000026193.15	Fn1	chr1	71649193	71649325	71650561	71650698	71651520	71651649	0.014881	0.0463942	0.0589256	0.783971	0.999593	0
ENSMUSG00000026193.15	Fn1	chr1	71649278	71649325	71650561	71650699	71651520	71651649	0.00351944	0.00283888	0.000989587	0.119859	0.896772	0
ENSMUSG00000026193.15	Fn1	chr1	71649193	71649325	71650561	71650699	71652831	71652995	0.42948	0.181025	0.168102	0.0397413	0.896772	0
ENSMUSG00000026193.15	Fn1	chr1	71649193	71649325	71650565	71650699	71651520	71651594	0.0858176	0.0463942	0.0299971	0.0520017	0.896772	0
ENSMUSG00000026193.15	Fn1	chr1	71649193	71649325	71650565	71650699	71652831	71652996	0.231206	0.0720145	0.284862	0.35441	0.905807	0
ENSMUSG00000026193.15	Fn1	chr1	71649193	71649325	71651520	71651649	71652633	71652922	0.254274	0.0629164	0.410968	0.462889	0.930278	0
ENSMUSG00000026193.15	Fn1	chr1	71649193	71649325	71651520	71651649	71652831	71652922	0.0204529	0.116895	0.210462	0.867129	0.999593	0
ENSMUSG00000026193.15	Fn1	chr1	71650565	71650699	71651520	71651649	71652831	71652996	0.00125859	0.000919069	0.000172292	0.0956345	0.896772	0
ENSMUSG00000055322.16	Tns1	chr1	73920957	73921089	73921766	73921853	73924705	73925769	0.00681568	0.0068191	0.0152066	0.599552	0.94996	0
ENSMUSG00000055322.16	Tns1	chr1	73927911	73928110	73937224	73937317	73952420	73953950	0.0734266	0.0545051	0.190744	0.613107	0.951573	0
ENSMUSG00000055322.16	Tns1	chr1	73937302	73937317	73940977	73942106	73952420	73953950	0.00593114	0.0578389	0.0134162	0.889887	0.999593	0
ENSMUSG00000055322.16	Tns1	chr1	73992204	73992222	73993162	73993213	73995200	73995372	0.00914465	0.00466785	0.0218243	0.613333	0.951625	0
ENSMUSG00000006301.17	Tmbim1	chr1	74289870	74289924	74290751	74290847	74291199	74291228	0.00304877	0.0063593	0.00308108	0.509149	0.931695	0
ENSMUSG00000006301.17	Tmbim1	chr1	74291694	74291734	74292456	74292507	74292834	74292888	0.0272134	0.0237245	0.0043885	0.140216	0.896772	0
ENSMUSG00000006301.17	Tmbim1	chr1	74292834	74292888	74293004	74293069	74293907	74294002	0.0222607	0.00840255	0.0118359	0.0949802	0.896772	0
ENSMUSG00000033364.13	Usp37	chr1	74456078	74456220	74459914	74459980	74461565	74461730	0.130819	0.129866	0.117165	0.284024	0.896772	0
ENSMUSG00000033364.13	Usp37	chr1	74495717	74495853	74495936	74495969	74499955	74500100	0.00890309	0.0162889	0.00812766	0.460348	0.930278	0
ENSMUSG00000026135.17	Zfp142	chr1	74578122	74578287	74579324	74579400	74585383	74585663	0.122807	0	0.13814	0.326405	0.899032	0
ENSMUSG00000026135.17	Zfp142	chr1	74578122	74578287	74579324	74579406	74585383	74585663	0.0265069	0.0765166	0.0662447	0.707629	0.976938	0
ENSMUSG00000026135.17	Zfp142	chr1	74578122	74578287	74579324	74579449	74585383	74585663	0.195207	0.208356	0.110023	0.213843	0.896772	0
ENSMUSG00000026135.17	Zfp142	chr1	74578122	74578287	74579324	74579618	74585383	74585697	0.0875178	0.142122	0.0355499	0.394288	0.920891	0
ENSMUSG00000026135.17	Zfp142	chr1	74578122	74578287	74579324	74579676	74585383	74585663	0.180821	0.186697	0.271472	0.477579	0.930278	0
ENSMUSG00000026135.17	Zfp142	chr1	74578122	74578287	74579324	74579927	74585383	74585663	0.0685927	0.132636	0.0511359	0.431578	0.930278	0
ENSMUSG00000026171.12	Rnf25	chr1	74594559	74594694	74595208	74595298	74595630	74595768	0.11689	0.0418453	0.046737	0.0495676	0.896772	0
ENSMUSG00000026171.12	Rnf25	chr1	74594559	74594694	74595208	74595301	74595630	74595768	0.052863	0.0146784	0.0216991	0.05417	0.896772	0
ENSMUSG00000026171.12	Rnf25	chr1	74598732	74598792	74599065	74599140	74601324	74601345	0.00535587	0.026511	0.0140718	0.777929	0.999593	0
ENSMUSG00000026162.7	Nhej1	chr1	74967138	74967768	74968168	74968275	74968794	74968912	0	0.159126	0	0.942534	0.999593	0
ENSMUSG00000033159.14	Cnppd1	chr1	75141415	75141503	75141699	75141769	75142057	75142560	0.065778	0.0551094	0	0.128502	0.896772	0
ENSMUSG00000033159.14	Cnppd1	chr1	75141415	75141503	75142057	75142560	75142642	75142711	0.0454154	0.0391028	0.0304132	0.203994	0.896772	0
ENSMUSG00000033124.16	Atg9a	chr1	75190302	75190434	75190822	75190877	75191823	75191923	0.0706522	0	0.0523171	0.197026	0.896772	0
ENSMUSG00000033124.16	Atg9a	chr1	75190302	75190434	75190822	75190880	75191823	75191923	0.056713	0.0140328	0.0472131	0.227062	0.896772	0
ENSMUSG00000026200.13	Glb1l	chr1	75202049	75202090	75202186	75202308	75202407	75202466	0.0972222	0.181621	0.0785674	0.440971	0.930278	0
ENSMUSG00000026200.13	Glb1l	chr1	75202407	75202466	75202574	75202749	75202846	75202890	0.0729167	0.0541266	0.0589256	0.23896	0.896772	0
ENSMUSG00000026202.13	Tuba4a	chr1	75215611	75216593	75216826	75216975	75217211	75217434	0.00244605	0.00512571	0.00262621	0.516444	0.933084	0
ENSMUSG00000026204.15	Ptprn	chr1	75253011	75253159	75253259	75253460	75253922	75254141	0.0121539	0	0.00306064	0.0304692	0.896772	0
ENSMUSG00000026204.15	Ptprn	chr1	75253922	75254141	75254584	75254649	75254778	75254858	0.0415638	0	0.0425324	0.302974	0.896772	0
ENSMUSG00000026204.15	Ptprn	chr1	75257292	75257424	75257944	75258637	75260570	75260667	0.0370048	0.0158592	0.0133636	0.0401666	0.896772	0
ENSMUSG00000026204.15	Ptprn	chr1	75258582	75258637	75260570	75260667	75262026	75262140	0.00208333	0.000892857	0.00420897	0.557804	0.943542	0
ENSMUSG00000026204.15	Ptprn	chr1	75260570	75260667	75262026	75262140	75262322	75262373	0.0489041	0.052151	0.0356038	0.261951	0.896772	0
ENSMUSG00000026209.15	Dnpep	chr1	75315983	75316070	75316329	75316443	75316540	75316629	0.00760431	0.0104907	0.0122762	0.514647	0.932361	0
ENSMUSG00000032997.16	Chpf	chr1	75477797	75477818	75478269	75478412	75478791	75479114	0.0243144	0.0411849	0.0178061	0.413855	0.924668	0
ENSMUSG00000026211.17	Obsl1	chr1	75491357	75491457	75492066	75492342	75492505	75492631	0.102564	0.0761341	0.107045	0.306306	0.896772	0
ENSMUSG00000026211.17	Obsl1	chr1	75492869	75493145	75493784	75494057	75497007	75497280	0.0347222	0.0257746	0.0682724	0.545908	0.942381	0
ENSMUSG00000026235.14	Epha4	chr1	77506547	77507211	77511682	77511750	77514940	77515079	0.0270126	0.0524356	0.0296035	0.489745	0.930962	0
ENSMUSG00000026245.16	Farsb	chr1	78458564	78458657	78462046	78462114	78462305	78462386	0.00867042	0.0123865	0	0.31128	0.896772	0
ENSMUSG00000026245.16	Farsb	chr1	78472569	78472634	78476189	78476305	78478192	78478262	0.00888872	0.00815587	0.00943321	0.339323	0.901782	0
ENSMUSG00000026245.16	Farsb	chr1	78479956	78480111	78482307	78482363	78488784	78488795	0.00439441	0.0165466	0.0079663	0.706687	0.97675	0
ENSMUSG00000054702.14	Ap1s3	chr1	79609185	79609202	79612900	79613092	79614202	79614340	0.031602	0.0563133	0.159704	0.871949	0.999593	0
ENSMUSG00000054702.14	Ap1s3	chr1	79614202	79614340	79623681	79623790	79625106	79625285	0.00990623	0.0569754	0.0325107	0.807319	0.999593	0
ENSMUSG00000073643.11	Wdfy1	chr1	79706243	79706352	79707451	79707582	79709092	79709194	0.0291634	0.0295872	0	0.187615	0.896772	0
ENSMUSG00000073643.11	Wdfy1	chr1	79719162	79719274	79722213	79722268	79724644	79724757	0.0278097	0.0416562	0.0546585	0.583011	0.947536	0
ENSMUSG00000073643.11	Wdfy1	chr1	79726604	79726716	79729655	79729710	79733799	79733873	0.0589283	0.128478	0.0537332	0.495532	0.930962	0
ENSMUSG00000073643.11	Wdfy1	chr1	79726604	79726716	79733799	79733873	79740061	79740129	0.0761461	0.0634315	0.0615353	0.250524	0.896772	0
ENSMUSG00000026249.10	Serpine2	chr1	79810553	79810751	79816727	79816955	79821276	79821322	0.00432099	0.00185185	0.00872971	0.557502	0.943542	0
ENSMUSG00000004364.14	Cul3	chr1	80267241	80267287	80269209	80269355	80271523	80271710	0.00315254	0.00142908	0.00314049	0.289478	0.896772	0
ENSMUSG00000004364.14	Cul3	chr1	80288830	80288858	80290081	80290242	80304079	80304193	0.00333472	0.00813169	0.000985602	0.53029	0.938241	0
ENSMUSG00000004364.14	Cul3	chr1	80304081	80304193	80321784	80321912	80322858	80323056	0.000550256	0.0130659	0.0105542	0.958568	0.999593	0
ENSMUSG00000004364.14	Cul3	chr1	80304081	80304193	80321784	80321930	80322858	80323056	0.00555969	0.00850207	0.0106744	0.572844	0.946564	0
ENSMUSG00000004364.14	Cul3	chr1	80304079	80304193	80321784	80321936	80322858	80323056	0.0172231	0.0102916	0.00788962	0.0895588	0.896772	0
ENSMUSG00000026149.2	Tm4sf20	chr1	82757401	82757711	82760167	82760319	82763926	82763992	0.0172588	0.0581608	0.0186298	0.6499	0.962632	0
ENSMUSG00000026219.14	Trip12	chr1	84742186	84742338	84743093	84743221	84743819	84744019	0.00353207	0.00483338	0	0.295159	0.896772	0
ENSMUSG00000026219.14	Trip12	chr1	84754402	84754478	84757416	84757535	84757721	84757950	0.00576359	0	0.004178	0.190378	0.896772	0
ENSMUSG00000026219.14	Trip12	chr1	84768582	84768731	84773116	84773200	84776316	84776412	0.00336717	0.00614361	0.00364723	0.477981	0.930278	0
ENSMUSG00000026219.14	Trip12	chr1	84776316	84776412	84777423	84777489	84782826	84782963	0.139949	0.107173	0.108334	0.229154	0.896772	0
ENSMUSG00000026219.14	Trip12	chr1	84776316	84776412	84777423	84777507	84782826	84782963	0.0578973	0.0354106	0.0420003	0.190073	0.896772	0
ENSMUSG00000026219.14	Trip12	chr1	84793537	84793584	84793671	84793694	84793770	84794327	0.0291667	0.0649519	0.0117851	0.505916	0.930962	0
ENSMUSG00000026219.14	Trip12	chr1	84794230	84794327	84795689	84795815	84814822	84814969	0.0405133	0.0218236	0.00761393	0.0430357	0.896772	0
ENSMUSG00000026234.12	Ncl	chr1	86353731	86353855	86355019	86355144	86356051	86356193	0.000725998	0.00246043	0.00109572	0.675122	0.967105	0
ENSMUSG00000026239.14	Pde6d	chr1	86543519	86543583	86545701	86545807	86546656	86546782	0.0964362	0.155652	0.112067	0.446801	0.930278	0
ENSMUSG00000026259.14	Ngef	chr1	87476833	87477744	87479010	87479207	87479836	87479916	0.362222	0.0917109	0.182409	0.114115	0.896772	0
ENSMUSG00000026259.14	Ngef	chr1	87476833	87477744	87479102	87479207	87479836	87479916	0.057431	0.00408503	0.0632906	0.330233	0.900193	0
ENSMUSG00000026259.14	Ngef	chr1	87476833	87477744	87479836	87479916	87480586	87480742	0.192476	0.142877	0.155544	0.220176	0.896772	0
ENSMUSG00000026259.14	Ngef	chr1	87484598	87484673	87486155	87486285	87487798	87487951	0.0677967	0.111436	0.110749	0.541829	0.94156	0
ENSMUSG00000005501.14	Usp40	chr1	87967509	87967598	87968395	87968449	87974076	87974134	0.00933106	0.0904842	0.0744812	0.898809	0.999593	0
ENSMUSG00000005501.14	Usp40	chr1	87967509	87967598	87968395	87968449	87975807	87975898	5.55112e-17	0.253685	5.55112e-17	0.883416	0.999593	0
ENSMUSG00000005501.14	Usp40	chr1	87967509	87967598	87974076	87974134	87975807	87975898	0.00833333	0.0859372	0.00673435	0.912429	0.999593	0
ENSMUSG00000005501.14	Usp40	chr1	87968395	87968449	87974076	87974134	87975807	87975898	0.0865164	0.0726527	0.0323507	0.135041	0.896772	0
ENSMUSG00000005501.14	Usp40	chr1	88002408	88002522	88004246	88004314	88007224	88007442	0.0430727	0.0695477	0.00499406	0.353226	0.905528	0
ENSMUSG00000005501.14	Usp40	chr1	88004246	88004314	88007224	88007442	88008437	88008528	0.0218139	0.0552782	0.014285	0.549233	0.943134	0
ENSMUSG00000044783.16	Hjurp	chr1	88266348	88266658	88267947	88268026	88269320	88269392	1.34669e-05	0.00636783	0.00518027	0.997533	0.999593	0
ENSMUSG00000026309.14	Ilkap	chr1	91378465	91378585	91381850	91381972	91384564	91384573	0.0344697	0.0249354	0.10623	0.71883	0.980771	0
ENSMUSG00000026309.14	Ilkap	chr1	91381850	91381972	91383303	91383391	91384564	91384573	0.0214015	0.014897	0.018653	0.252756	0.896772	0
ENSMUSG00000026309.14	Ilkap	chr1	91381850	91381972	91384564	91384658	91385239	91385346	0.114828	0.189415	0.118379	0.430345	0.930278	0
ENSMUSG00000026309.14	Ilkap	chr1	91385343	91385346	91387214	91388464	91390606	91390663	0.00787013	0.0145449	0.017762	0.631063	0.957369	0
ENSMUSG00000026309.14	Ilkap	chr1	91387214	91387341	91388344	91388446	91390606	91390663	0.0114565	0.0201181	0.0254813	0.626703	0.955698	0
ENSMUSG00000026309.14	Ilkap	chr1	91387214	91387341	91388344	91388464	91390606	91390663	0.00900113	0.00993994	0.00688182	0.285056	0.896772	0
ENSMUSG00000026309.14	Ilkap	chr1	91387214	91387341	91388354	91388446	91390606	91390663	0.0259999	0.0263562	0.0261891	0.334403	0.900823	0
ENSMUSG00000026309.14	Ilkap	chr1	91387214	91387341	91388354	91388464	91390606	91390663	0.0259999	0.0263562	0.0261891	0.334403	0.900823	0
ENSMUSG00000026309.14	Ilkap	chr1	91390606	91390663	91390983	91391031	91391131	91391197	0.0105651	0.0155915	0.0118017	0.432702	0.930278	0
ENSMUSG00000026309.14	Ilkap	chr1	91390606	91390663	91390983	91391197	91398650	91398700	0.0178753	0.287004	0.363245	0.921157	0.999593	0
ENSMUSG00000026309.14	Ilkap	chr1	91390606	91390663	91391108	91391192	91398650	91398700	0.129957	0.104244	0.192854	0.449527	0.930278	0
ENSMUSG00000026309.14	Ilkap	chr1	91390606	91390663	91391108	91391197	91398650	91398700	0.0270592	0.0769577	0.143617	0.844865	0.999593	0
ENSMUSG00000026309.14	Ilkap	chr1	91390606	91390663	91391131	91391197	91398650	91398700	0.0350484	0.0448343	0.0374242	0.389265	0.917652	0
ENSMUSG00000055866.9	Per2	chr1	91419374	91419525	91420405	91420598	91421367	91421554	0.0193888	0.0247824	0	0.269394	0.896772	0
ENSMUSG00000026313.16	Hdac4	chr1	91933655	91933797	91934601	91934686	91947417	91947536	0.0648148	0.0481125	0.0523783	0.229325	0.896772	0
ENSMUSG00000026313.16	Hdac4	chr1	91934601	91934686	91945899	91946033	91947417	91947536	0.108568	0.116907	0.0636536	0.237078	0.896772	0
ENSMUSG00000026313.16	Hdac4	chr1	91947417	91947536	91953545	91953802	91955289	91955387	0.0797414	0.102252	0	0.262345	0.896772	0
ENSMUSG00000026313.16	Hdac4	chr1	91987544	91987657	91991482	91991614	91996056	91996178	0.0413814	0.12179	0.0399947	0.597283	0.949574	0
ENSMUSG00000026313.16	Hdac4	chr1	92030143	92030196	92048834	92048889	92054900	92054972	0.020876	0.0140172	0	0.0812922	0.896772	0
ENSMUSG00000026313.16	Hdac4	chr1	92030143	92030196	92054900	92054972	92148255	92148393	0.00765662	0.0377568	0.0148978	0.75839	0.993823	0
ENSMUSG00000026313.16	Hdac4	chr1	92054900	92054972	92091731	92091818	92148255	92148393	0.0170635	0	0.0136198	0.217697	0.896772	0
ENSMUSG00000026313.16	Hdac4	chr1	92054900	92054972	92141519	92141581	92148255	92148393	0.0375921	0.0297104	0.00535687	0.112707	0.896772	0
ENSMUSG00000026260.12	Ndufa10	chr1	92467414	92467467	92469862	92470093	92470816	92470862	0	0.120073	0	0.959452	0.999593	0
ENSMUSG00000026260.12	Ndufa10	chr1	92469862	92470078	92470816	92470985	92473662	92473747	0.00799304	0.00548117	0.0157792	0.552264	0.943411	0
ENSMUSG00000073616.10	Cops9	chr1	92637144	92637403	92639686	92639759	92641879	92641985	0.00832151	0.0109006	0.0277369	0.71575	0.979505	0
ENSMUSG00000034159.12	Mab21l4	chr1	93152916	93153273	93154486	93154596	93155978	93156178	0.0462963	0.0114554	0.0748261	0.477947	0.930278	0
ENSMUSG00000034159.12	Mab21l4	chr1	93152916	93153273	93154486	93154640	93155978	93156178	0.00785344	0.0651158	0.0482941	0.891833	0.999593	0
ENSMUSG00000034088.15	Hdlbp	chr1	93413826	93413931	93414811	93414966	93416500	93416639	0.0021462	0.0195787	0.0116736	0.880535	0.999593	0
ENSMUSG00000034088.15	Hdlbp	chr1	93421342	93421429	93423263	93423377	93423769	93423874	0.000864523	0.00104881	0	0.24871	0.896772	0
ENSMUSG00000034088.15	Hdlbp	chr1	93428147	93428252	93429377	93429485	93430097	93430304	0.00723827	0.00854468	0.00248478	0.244164	0.896772	0
ENSMUSG00000034088.15	Hdlbp	chr1	93428147	93428252	93429424	93429485	93430097	93430304	0.210769	0.258375	0.0964246	0.265901	0.896772	0
ENSMUSG00000034088.15	Hdlbp	chr1	93429424	93429485	93430097	93430301	93430954	93431170	0.0626485	0.105262	0.0972284	0.532065	0.93859	0
ENSMUSG00000034088.15	Hdlbp	chr1	93429424	93429485	93430097	93430304	93430954	93431154	0.00299123	0.000817957	0.00617371	0.564125	0.945192	0
ENSMUSG00000034088.15	Hdlbp	chr1	93440297	93440781	93442185	93442250	93445579	93445649	0.0483424	0.0679813	0.0370809	0.362079	0.908825	0
ENSMUSG00000034088.15	Hdlbp	chr1	93440297	93440781	93442185	93442250	93478206	93478377	0.00663423	0.112062	0.115106	0.949808	0.999593	0
ENSMUSG00000034088.15	Hdlbp	chr1	93440297	93440781	93442185	93442791	93445579	93445649	0.0299145	0.299435	0.0241746	0.753431	0.991986	0
ENSMUSG00000034088.15	Hdlbp	chr1	93440687	93440792	93441740	93441840	93442185	93442250	8.48816e-05	0.00275063	0.00070631	0.963626	0.999593	0
ENSMUSG00000026277.14	Stk25	chr1	93623395	93623532	93624552	93624624	93625033	93625148	0.00115402	0.00468513	0.00776431	0.861663	0.999593	0
ENSMUSG00000026277.14	Stk25	chr1	93623395	93623532	93624552	93624624	93625460	93625606	0.147408	0.0686262	0.245614	0.480476	0.930278	0
ENSMUSG00000026277.14	Stk25	chr1	93623395	93623532	93624552	93625148	93625460	93625606	0.00385256	0.00499106	0.00869998	0.611397	0.951398	0
ENSMUSG00000026277.14	Stk25	chr1	93624552	93624624	93624930	93625148	93625460	93625606	0.271825	0.0991028	0.185921	0.151055	0.896772	0
ENSMUSG00000026277.14	Stk25	chr1	93624552	93624624	93625033	93625148	93625460	93625606	0.000127772	0.0121741	0.0375152	0.988228	0.999593	0
ENSMUSG00000026277.14	Stk25	chr1	93627024	93627133	93627653	93627710	93629033	93629264	0.0134455	0.0186373	0.00902164	0.333328	0.900193	0
ENSMUSG00000026277.14	Stk25	chr1	93627653	93627710	93628262	93628372	93629033	93629264	0.00331433	0.0091347	0.00304039	0.594763	0.948449	0
ENSMUSG00000026277.14	Stk25	chr1	93627653	93627710	93629033	93629264	93635297	93635383	0.00389252	0.00497317	0.00152805	0.276502	0.896772	0
ENSMUSG00000026277.14	Stk25	chr1	93629033	93629264	93634941	93635383	93654018	93654218	0.275434	0.0340383	0.218551	0.182052	0.896772	0
ENSMUSG00000026277.14	Stk25	chr1	93629033	93629264	93635297	93635383	93654018	93654218	0.00205011	0.033763	0.0823127	0.958191	0.999593	0
ENSMUSG00000044768.16	D1Ertd622e	chr1	97645934	97646361	97654599	97654689	97661830	97662074	0.0944716	0.0577795	0.0671928	0.188657	0.896772	0
ENSMUSG00000040648.14	Ppip5k2	chr1	97713003	97713144	97716541	97716604	97717441	97717561	0.156389	0.228939	0.126381	0.380895	0.913754	0
ENSMUSG00000040648.14	Ppip5k2	chr1	97713003	97713144	97716541	97717561	97719833	97719906	0.00910056	0.0366548	0.0293356	0.774601	0.999322	0
ENSMUSG00000040648.14	Ppip5k2	chr1	97713003	97713144	97717441	97717561	97719833	97719906	0.00481826	0.0194071	0.0301606	0.860238	0.999593	0
ENSMUSG00000040648.14	Ppip5k2	chr1	97719833	97719906	97721105	97721279	97723669	97723834	0.0181534	0.0584464	0.0238665	0.680636	0.96882	0
ENSMUSG00000040648.14	Ppip5k2	chr1	97734966	97735108	97740461	97740644	97740823	97740942	0.00931416	0.00765754	0	0.126057	0.896772	0
ENSMUSG00000040648.14	Ppip5k2	chr1	97755923	97755971	97756843	97756934	97759168	97759364	0.0115641	0.0574795	0.0537457	0.82926	0.999593	0
ENSMUSG00000040648.14	Ppip5k2	chr1	97755923	97755971	97759168	97759364	97761424	97761538	0.1409	0.291667	0.128294	0.478378	0.930278	0
ENSMUSG00000026335.16	Pam	chr1	97821980	97821988	97822935	97822989	97825836	97825985	0.043234	0.0902332	0.0252119	0.468925	0.930278	0
ENSMUSG00000026335.16	Pam	chr1	97821980	97821988	97822935	97822989	97831454	97831508	0.083591	0.0680847	0.037285	0.139691	0.896772	0
ENSMUSG00000026335.16	Pam	chr1	97821980	97821988	97825836	97826037	97831454	97831508	0.0618367	0.0449206	0.0662802	0.325663	0.898287	0
ENSMUSG00000026335.16	Pam	chr1	97821980	97821988	97825836	97826040	97831454	97831508	0.0136386	0.143636	0.102613	0.879894	0.999593	0
ENSMUSG00000026335.16	Pam	chr1	97822935	97822989	97825836	97826037	97831454	97831508	0.0449774	0.133132	0.0793455	0.688853	0.971444	0
ENSMUSG00000026335.16	Pam	chr1	97822935	97822989	97825836	97826040	97831454	97831508	0.00923437	0.0360231	0.012921	0.716231	0.979535	0
ENSMUSG00000026335.16	Pam	chr1	97822723	97822992	97825836	97826037	97831454	97831508	0.0828162	0.0638338	0.2046	0.586126	0.948071	0
ENSMUSG00000026335.16	Pam	chr1	97822723	97822992	97825836	97826040	97831454	97831508	0.0828162	0.0638338	0.2046	0.586126	0.948071	0
ENSMUSG00000026335.16	Pam	chr1	97853102	97853232	97864202	97864520	97884125	97884196	0.0305978	0.0742146	0.022561	0.555164	0.943411	0
ENSMUSG00000026335.16	Pam	chr1	97895631	97895708	97895968	97896046	97897207	97897275	1.11022e-16	0.104757	1.11022e-16	0.963982	0.999593	0
ENSMUSG00000026335.16	Pam	chr1	97895631	97895708	97895968	97896049	97897207	97897275	0.00526721	0.012058	0.00438042	0.52513	0.935873	0
ENSMUSG00000047496.6	Rnf152	chr1	105276916	105284954	105355040	105355163	105356342	105356670	0.0476634	0.0504238	0.0637517	0.432752	0.930278	0
ENSMUSG00000056536.14	Pign	chr1	105584988	105585097	105587979	105588071	105589048	105589141	0.0312511	0.0550556	0.0214613	0.412646	0.924025	0
ENSMUSG00000056536.14	Pign	chr1	105657601	105657850	105658886	105659006	105659292	105659366	0.0187255	0.174991	0.122744	0.861867	0.999593	0
ENSMUSG00000056536.14	Pign	chr1	105657601	105657850	105658915	105659006	105659292	105659366	0.00648148	0.0114531	0.00261891	0.406785	0.922474	0
ENSMUSG00000009905.5	Kdsr	chr1	106747770	106747836	106748820	106748938	106753211	106753268	0.00193575	0.00638135	0.00277745	0.666673	0.965918	0
ENSMUSG00000009907.17	Vps4b	chr1	106778968	106779050	106779482	106779572	106779961	106780110	0.00619143	0.00967386	0.0020378	0.354493	0.905807	0
ENSMUSG00000009907.17	Vps4b	chr1	106782665	106782785	106785780	106786028	106786702	106786770	0.00403714	0.00398447	0.0102501	0.642463	0.96101	0
ENSMUSG00000009907.17	Vps4b	chr1	106782665	106782785	106786702	106786770	106789928	106789949	0.007354	0.0199662	0.0153695	0.661544	0.964549	0
ENSMUSG00000038702.6	Dsel	chr1	111863322	111863640	111864094	111864231	111864395	111864880	0.055424	0.0843825	0.028428	0.350907	0.904241	0
ENSMUSG00000026374.14	Tsn	chr1	118300888	118301037	118304690	118304770	118305199	118305315	0.00305771	0.0245007	0.0281289	0.908046	0.999593	0
ENSMUSG00000004451.14	Ralb	chr1	119475894	119476072	119477032	119477180	119477914	119478079	0.000894886	0.00240503	0.00238345	0.701569	0.974792	0
ENSMUSG00000004451.14	Ralb	chr1	119477914	119478123	119483493	119483656	119504576	119504794	0.000538198	0.0152672	0.00120205	0.960284	0.999593	0
ENSMUSG00000026383.14	Epb41l5	chr1	119599004	119599120	119600197	119600237	119605227	119605255	0.00658516	0.0726483	0.0588935	0.910045	0.999593	0
ENSMUSG00000026383.14	Epb41l5	chr1	119617654	119617674	119620166	119620219	119620674	119620719	0.0585422	0.0138934	0.0910722	0.457438	0.930278	0
ENSMUSG00000026383.14	Epb41l5	chr1	119620674	119620719	119621885	119621964	119623925	119623968	0.0365455	0.0260081	0.0652543	0.511562	0.931723	0
ENSMUSG00000026383.14	Epb41l5	chr1	119620674	119620719	119621885	119621987	119623925	119623968	0.075	0.104185	0.0606092	0.37227	0.910985	0
ENSMUSG00000026383.14	Epb41l5	chr1	119633544	119633649	119642476	119642658	119648784	119648934	0.0369769	0.0442914	0	0.245621	0.896772	0
ENSMUSG00000026384.13	Ptpn4	chr1	119678754	119678883	119680048	119680195	119682483	119682545	0.0359907	0.0483529	0	0.289657	0.896772	0
ENSMUSG00000026384.13	Ptpn4	chr1	119721863	119722036	119726032	119726096	119741354	119741436	0.00042735	0.0199852	0.0157135	0.978029	0.999593	0
ENSMUSG00000026384.13	Ptpn4	chr1	119765468	119765481	119765877	119765922	119773048	119773127	0.0573593	0.0871733	0.0107137	0.339901	0.901782	0
ENSMUSG00000026384.13	Ptpn4	chr1	119773057	119773127	119773228	119773271	119783481	119783502	0.00559752	0.0332648	0.0116778	0.79282	0.999593	0
ENSMUSG00000026384.13	Ptpn4	chr1	119773228	119773271	119778951	119779050	119783481	119783502	0.0012896	0.0222801	0.00964163	0.923116	0.999593	0
ENSMUSG00000026384.13	Ptpn4	chr1	119773228	119773271	119783481	119783589	119802322	119802477	0.0964211	0.0324229	0.029163	0.0199539	0.896772	0
ENSMUSG00000026384.13	Ptpn4	chr1	119802322	119802477	119812093	119812141	119836901	119836999	0.0188263	0.019618	0	0.194613	0.896772	0
ENSMUSG00000026341.16	Actr3	chr1	125395067	125395151	125396981	125397232	125397451	125397544	0.0385165	0.0926764	0.0441942	0.556471	0.943411	0
ENSMUSG00000026341.16	Actr3	chr1	125395067	125395151	125396981	125397232	125403392	125403566	0.245517	0.0932199	0.152645	0.120654	0.896772	0
ENSMUSG00000026341.16	Actr3	chr1	125395067	125395151	125397106	125397232	125397451	125397544	0.00146194	0.00266857	0.001491	0.469754	0.930278	0
ENSMUSG00000026341.16	Actr3	chr1	125395067	125395151	125397106	125397232	125403392	125403566	0.245517	0.0932199	0.152645	0.120654	0.896772	0
ENSMUSG00000026341.16	Actr3	chr1	125395067	125395151	125397451	125397544	125403392	125403566	0.00177384	0.0932588	0.128565	0.963778	0.999593	0
ENSMUSG00000026341.16	Actr3	chr1	125397106	125397232	125397451	125397510	125403392	125403566	0.428704	0.184309	0.173222	0.0643151	0.896772	0
ENSMUSG00000026341.16	Actr3	chr1	125397106	125397232	125397451	125397531	125403392	125403566	0.383333	0.370672	0.15489	0.183853	0.896772	0
ENSMUSG00000026341.16	Actr3	chr1	125397106	125397232	125397451	125397544	125403392	125403566	0.004509	0.00356642	0.00318248	0.204363	0.896772	0
ENSMUSG00000026341.16	Actr3	chr1	125411263	125411374	125411710	125411789	125416255	125416380	0.000404862	0.000497859	0.000514574	0.429778	0.930278	0
ENSMUSG00000026341.16	Actr3	chr1	125411263	125411374	125416255	125416380	125418248	125418304	0.000248974	0.000258824	0.000563432	0.605807	0.950197	0
ENSMUSG00000026341.16	Actr3	chr1	125411263	125411374	125416255	125416380	125435284	125435309	0.115006	0.189328	0.0840926	0.379471	0.91323	0
ENSMUSG00000026341.16	Actr3	chr1	125411263	125411374	125418248	125418304	125435284	125435309	0.0570513	0.0344307	0.090468	0.475971	0.930278	0
ENSMUSG00000026341.16	Actr3	chr1	125416255	125416380	125418248	125418304	125435284	125435309	0.00289412	0.00274592	0.00378989	0.41436	0.925004	0
ENSMUSG00000036086.16	Zranb3	chr1	127965130	127965164	127965780	127966333	127967877	127967964	0.0299769	0.022252	0.0114156	0.111869	0.896772	0
ENSMUSG00000086825.1	Gm15675	chr1	130429780	130432225	130434536	130434579	130435671	130435820	0.055483	0.0795387	0.044837	0.385289	0.915695	0
ENSMUSG00000026399.12	Cd55	chr1	130456820	130456906	130458086	130458186	130459581	130459698	0.0168951	0.0277378	0.0387893	0.626093	0.955427	0
ENSMUSG00000026399.12	Cd55	chr1	130459592	130459773	130460071	130460299	130461821	130462007	0.0286996	0.0478319	0.00472466	0.376767	0.911968	0
ENSMUSG00000026399.12	Cd55	chr1	130461821	130462007	130462097	130462324	130462569	130462731	0.00115798	0.00666173	0.00380165	0.816823	0.999593	0
ENSMUSG00000026409.14	Pfkfb2	chr1	130698678	130698743	130699187	130699250	130699980	130700110	0.0041539	0.0195344	0.0218243	0.838564	0.999593	0
ENSMUSG00000026409.14	Pfkfb2	chr1	130702230	130702438	130705376	130705501	130706425	130706482	0.00797785	0.0271266	0.0290992	0.772332	0.99826	0
ENSMUSG00000042349.13	Ikbke	chr1	131259181	131259283	131260005	131260045	131263272	131263349	0.0535617	0.0881763	0.0402129	0.418305	0.926516	0
ENSMUSG00000042349.13	Ikbke	chr1	131265874	131265950	131266492	131266580	131269800	131269887	0.0232017	0.034641	0.0296389	0.453185	0.930278	0
ENSMUSG00000042349.13	Ikbke	chr1	131265874	131265950	131267388	131267757	131269071	131269317	0.102904	0.0518132	0.0869868	0.232929	0.896772	0
ENSMUSG00000042349.13	Ikbke	chr1	131265874	131265950	131267388	131267757	131269800	131269887	0.00517336	0.0543955	0.0307911	0.915053	0.999593	0
ENSMUSG00000042349.13	Ikbke	chr1	131265874	131265950	131269071	131269317	131269800	131269887	0.0525005	0.0744512	0.0817889	0.499962	0.930962	0
ENSMUSG00000042349.13	Ikbke	chr1	131266492	131266580	131267388	131267757	131269800	131269887	0	0	0.0964951	0.968212	0.999593	0
ENSMUSG00000042349.13	Ikbke	chr1	131267557	131267757	131269071	131269317	131269800	131269887	0.198422	0.14729	0.196889	0.312262	0.896772	0
ENSMUSG00000042349.13	Ikbke	chr1	131276467	131276578	131276893	131276966	131278698	131278787	0.0342638	0.0312491	0.0104685	0.150543	0.896772	0
ENSMUSG00000042349.13	Ikbke	chr1	131276467	131276578	131278698	131278787	131279330	131279606	0.0651357	0.0163401	0.0217559	0.0309522	0.896772	0
ENSMUSG00000026425.15	Srgap2	chr1	131289357	131289740	131291595	131291690	131292520	131292845	0.0270212	0.0377118	0.0495475	0.55213	0.943411	0
ENSMUSG00000059149.17	Mfsd4a	chr1	132028452	132028547	132038176	132038973	132040539	132040562	0.0162037	0.0455378	0.0130946	0.605602	0.950084	0
ENSMUSG00000059149.17	Mfsd4a	chr1	132040539	132040660	132041857	132041928	132046305	132046453	0.0226021	0.0137258	0	0.0651154	0.896772	0
ENSMUSG00000059149.17	Mfsd4a	chr1	132052379	132052553	132053548	132053664	132054058	132054177	0.00451142	0.0211639	0.0334211	0.871736	0.999593	0
ENSMUSG00000059149.17	Mfsd4a	chr1	132057715	132057967	132059159	132059270	132067662	132067826	0	0.192117	0	0.896512	0.999593	0
ENSMUSG00000059149.17	Mfsd4a	chr1	132057831	132057967	132059159	132059358	132067662	132067826	0.0627461	0.0844725	0.0463409	0.330286	0.900193	0
ENSMUSG00000026437.11	Cdk18	chr1	132115861	132115952	132116446	132116489	132116595	132116690	0.0072102	0.0161132	0.0359661	0.804635	0.999593	0
ENSMUSG00000026437.11	Cdk18	chr1	132116883	132116981	132117481	132117535	132117749	132117873	0.0994658	0.239526	0.135284	0.540983	0.941342	0
ENSMUSG00000026437.11	Cdk18	chr1	132116883	132116981	132117481	132117602	132117749	132117873	0.0183152	0.0329602	0.026705	0.527514	0.936905	0
ENSMUSG00000026437.11	Cdk18	chr1	132118520	132118583	132118849	132118881	132119099	132119214	0.127137	0.194723	0.102742	0.422876	0.928591	0
ENSMUSG00000026437.11	Cdk18	chr1	132118520	132118583	132118849	132118944	132119099	132119214	0.0290634	0.0137497	0.0318126	0.327622	0.899685	0
ENSMUSG00000026442.14	Nfasc	chr1	132596525	132596648	132600071	132600214	132601970	132602193	0.0335622	0.0430547	0	0.266526	0.896772	0
ENSMUSG00000026442.14	Nfasc	chr1	132621511	132621623	132627871	132627922	132631684	132631855	0.000599176	0.0212957	0.0165405	0.976876	0.999593	0
ENSMUSG00000026442.14	Nfasc	chr1	132636985	132637091	132637863	132637881	132642677	132642858	0.0825336	0.100941	0.0223103	0.258176	0.896772	0
ENSMUSG00000026442.14	Nfasc	chr1	132642677	132642858	132665478	132665587	132741670	132741757	0.00599369	0.065005	0.0658855	0.925126	0.999593	0
ENSMUSG00000054387.13	Mdm4	chr1	132996643	132996709	133001282	133001443	133003790	133003890	0.0190696	0.0360152	0.0163419	0.462107	0.930278	0
ENSMUSG00000054387.13	Mdm4	chr1	132996753	132996835	133001282	133001443	133003790	133003890	0.0592565	0.0911606	0.0799367	0.486474	0.930962	0
ENSMUSG00000054387.13	Mdm4	chr1	133003790	133003890	133004653	133004692	133009136	133009192	0.0723649	0.0184432	0.00887174	0.00308401	0.896772	0
ENSMUSG00000054387.13	Mdm4	chr1	133003790	133003890	133004653	133004721	133009136	133009192	0.0746216	0.0203945	0.0199805	0.0116456	0.896772	0
ENSMUSG00000054387.13	Mdm4	chr1	133003790	133003890	133009136	133009192	133011064	133011144	0.00614474	0.0183115	0.0178198	0.726264	0.982711	0
ENSMUSG00000054387.13	Mdm4	chr1	133009150	133009192	133011064	133011144	133012636	133012711	0.118056	0.0876335	0.0954033	0.22398	0.896772	0
ENSMUSG00000054387.13	Mdm4	chr1	133009150	133009192	133011064	133011198	133012636	133012711	0.00294524	0.0189407	0.0106277	0.830478	0.999593	0
ENSMUSG00000054387.13	Mdm4	chr1	133018776	133018884	133019353	133019431	133025247	133025330	0.00285543	0.00956766	0.0101598	0.767205	0.99632	0
ENSMUSG00000070643.11	Sox13	chr1	133390728	133390840	133393072	133393271	133423875	133423942	0.0001554	0.0174955	0.0145048	0.993133	0.999593	0
ENSMUSG00000090553.8	Snrpe	chr1	133603895	133604076	133606500	133606579	133608896	133608959	0.00254896	0.00921459	0.0119402	0.813747	0.999593	0
ENSMUSG00000026463.17	Atp2b4	chr1	133706310	133706996	133711631	133711822	133715053	133715092	0.0228743	0.0211226	0.027422	0.378688	0.912876	0
ENSMUSG00000026463.17	Atp2b4	chr1	133706310	133706996	133711641	133711822	133715053	133715092	0.0355867	0.0108253	0.0209619	0.117878	0.896772	0
ENSMUSG00000026463.17	Atp2b4	chr1	133735047	133735209	133736615	133736651	133737989	133738118	0.0116909	0.0250791	0.0208205	0.597042	0.949574	0
ENSMUSG00000026463.17	Atp2b4	chr1	133735047	133735209	133736805	133736941	133737989	133738118	0.141414	0.104973	0.0571399	0.0997201	0.896772	0
ENSMUSG00000042305.12	Tmem183a	chr1	134352354	134352435	134352974	134353134	134354660	134354841	0.0148647	0.0453656	0.0198463	0.620554	0.954193	0
ENSMUSG00000042305.12	Tmem183a	chr1	134352354	134352435	134352974	134353137	134354660	134354841	0.00819843	0.040205	0.0446876	0.843405	0.999593	0
ENSMUSG00000073557.12	Ppp1r12b	chr1	134865777	134865960	134870067	134870250	134872267	134872310	0.0482791	0.0349323	0	0.0977263	0.896772	0
ENSMUSG00000073557.12	Ppp1r12b	chr1	134865777	134865960	134872267	134872310	134872806	134872932	0.0291147	0.0168635	0.0235282	0.223869	0.896772	0
ENSMUSG00000073557.12	Ppp1r12b	chr1	134893349	134893509	134896342	134896461	134902377	134902508	0.0245519	0.0216922	0	0.145627	0.896772	0
ENSMUSG00000073557.12	Ppp1r12b	chr1	134896342	134896461	134902377	134902508	134955491	134955851	0.066901	0.0720749	0.0241564	0.21309	0.896772	0
ENSMUSG00000042793.13	Lgr6	chr1	134993868	134994029	134995983	134996109	134997652	134997724	0.133548	0.12881	0.0248233	0.182872	0.896772	0
ENSMUSG00000042793.13	Lgr6	chr1	135000477	135000549	135001699	135001768	135003199	135003271	0.0215825	0.0350507	0.0015594	0.363276	0.908869	0
ENSMUSG00000042793.13	Lgr6	chr1	135072884	135072956	135075226	135075298	135104928	135105276	0.0248895	0	0.0283252	0.340934	0.901782	0
ENSMUSG00000042793.13	Lgr6	chr1	135075226	135075298	135081658	135081770	135104928	135105276	0.0158125	0	0.0146132	0.264345	0.896772	0
ENSMUSG00000003051.13	Elf3	chr1	135254967	135255120	135255326	135256091	135256233	135256323	0.0689394	0.0511742	0.0557114	0.229058	0.896772	0
ENSMUSG00000003051.13	Elf3	chr1	135254967	135255120	135255974	135256091	135256233	135256323	0.000270004	0.00159407	0.00141424	0.850903	0.999593	0
ENSMUSG00000003051.13	Elf3	chr1	135256233	135256323	135256470	135256590	135256778	135256874	0.0140555	0.00612746	0.0139926	0.289739	0.896772	0
ENSMUSG00000003051.13	Elf3	chr1	135256233	135256323	135256470	135256874	135257004	135257226	0.00101093	0.00182238	0.00385765	0.755082	0.992358	0
ENSMUSG00000003051.13	Elf3	chr1	135256233	135256323	135256471	135256590	135256778	135256874	0.00981365	0.0283588	0.00793063	0.61062	0.951398	0
ENSMUSG00000003051.13	Elf3	chr1	135256233	135256323	135256778	135256874	135257004	135257226	0.0495768	0.0428362	0.0400641	0.255325	0.896772	0
ENSMUSG00000041926.15	Rnpep	chr1	135268082	135268196	135271528	135271764	135277388	135277537	0.0285849	0.0388316	0	0.293609	0.896772	0
ENSMUSG00000041926.15	Rnpep	chr1	135271551	135271764	135272361	135272478	135277388	135277537	0.0136012	0.0695748	0.0319625	0.766897	0.99632	0
ENSMUSG00000041879.13	Ipo9	chr1	135385120	135385477	135385926	135386003	135386218	135386320	0.0551501	0.0137152	0.0125894	0.00698499	0.896772	0
ENSMUSG00000041879.13	Ipo9	chr1	135391495	135391644	135391754	135391935	135394135	135394362	0.0342803	0.0526615	0.00997665	0.348897	0.903945	0
ENSMUSG00000041879.13	Ipo9	chr1	135420291	135420353	135425923	135425983	135426930	135427041	0.0108025	0.0721688	0.0372934	0.806153	0.999593	0
ENSMUSG00000041879.13	Ipo9	chr1	135420291	135420353	135425923	135425986	135426930	135427041	0.0279402	0.0911606	0.0349189	0.675491	0.967105	0
ENSMUSG00000041879.13	Ipo9	chr1	135420291	135420353	135426923	135427041	135430267	135430419	0.0110311	0.0198326	0.0138238	0.490207	0.930962	0
ENSMUSG00000041879.13	Ipo9	chr1	135420291	135420353	135426930	135427041	135430267	135430419	0.00524494	0.0234311	0.0352624	0.873454	0.999593	0
ENSMUSG00000009418.16	Nav1	chr1	135455133	135455330	135457860	135457869	135458655	135458777	0.00106698	0.00486531	0.00548145	0.83481	0.999593	0
ENSMUSG00000009418.16	Nav1	chr1	135463721	135463799	135463914	135463938	135464705	135464758	0.0119951	0.0468918	0.0356971	0.763161	0.995001	0
ENSMUSG00000009418.16	Nav1	chr1	135463721	135463799	135464705	135464758	135465838	135466009	0.0558942	0.0350064	0.0442475	0.220873	0.896772	0
ENSMUSG00000009418.16	Nav1	chr1	135464705	135464758	135465838	135466009	135467640	135467673	0.0113931	0.0163219	0.0313913	0.669217	0.966508	0
ENSMUSG00000009418.16	Nav1	chr1	135467640	135467789	135468855	135468894	135469631	135470066	0	0	0.047629	0.985493	0.999593	0
ENSMUSG00000009418.16	Nav1	chr1	135467640	135467789	135468855	135468897	135469631	135470066	0.0286809	0	0.0234627	0.22676	0.896772	0
ENSMUSG00000009418.16	Nav1	chr1	135537196	135537299	135584554	135585355	135602544	135602648	0.0462229	0.0288224	0.0525904	0.340929	0.901782	0
ENSMUSG00000009418.16	Nav1	chr1	135537196	135537299	135584735	135585355	135602544	135602648	0	0	0.0429735	0.979585	0.999593	0
ENSMUSG00000009418.16	Nav1	chr1	135607627	135607904	135659653	135659778	135687918	135688105	0.00568166	0.0564799	0.00705116	0.902805	0.999593	0
ENSMUSG00000009418.16	Nav1	chr1	135658217	135658417	135659653	135659778	135687918	135688105	1.11022e-16	0	0.0340207	0.991314	0.999593	0
ENSMUSG00000009418.16	Nav1	chr1	135659653	135659778	135660179	135660269	135687918	135688105	0.105122	0.0780325	0.0836337	0.231895	0.896772	0
ENSMUSG00000087230.10	Mroh3	chr1	136182717	136182777	136183319	136183422	136184264	136184366	0.00578886	0.101243	0.291323	0.9006	0.999593	0
ENSMUSG00000087230.10	Mroh3	chr1	136182717	136182777	136183319	136184128	136184264	136184366	0.125285	0.157861	0.152293	0.414904	0.925669	0
ENSMUSG00000087230.10	Mroh3	chr1	136183319	136183422	136184058	136184128	136184264	136184366	0.328757	0.155568	0.153914	0.0715896	0.896772	0
ENSMUSG00000087230.10	Mroh3	chr1	136190784	136190813	136190907	136191045	136191511	136191684	0	0	0.074227	0.980558	0.999593	0
ENSMUSG00000087230.10	Mroh3	chr1	136199522	136199611	136200342	136200478	136200940	136201048	0	0.0707107	0	0.976306	0.999593	0
ENSMUSG00000087230.10	Mroh3	chr1	136200940	136201048	136202061	136202098	136206916	136207003	0.0598695	0.217579	0.031313	0.75313	0.991986	0
ENSMUSG00000041605.16	Inava	chr1	136220315	136220341	136220862	136220935	136221071	136221125	0.00512001	0.00699067	0	0.29356	0.896772	0
ENSMUSG00000041570.14	Camsap2	chr1	136273749	136273865	136273954	136274178	136274800	136274873	0.00261466	0.0279945	0.0144841	0.907727	0.999593	0
ENSMUSG00000041570.14	Camsap2	chr1	136283866	136283901	136285008	136285099	136285908	136286002	0.00699389	0.0374808	0.0195265	0.783252	0.999593	0
ENSMUSG00000041570.14	Camsap2	chr1	136283866	136283901	136285908	136286002	136287899	136287993	0.00307992	0.0157231	0.0261891	0.887468	0.999593	0
ENSMUSG00000041570.14	Camsap2	chr1	136293279	136293421	136297741	136297825	136304294	136304456	0.0158143	0.036977	0.0417405	0.686404	0.97121	0
ENSMUSG00000041570.14	Camsap2	chr1	136297741	136297825	136304294	136304456	136324736	136324996	0.00202655	0.00694035	0.00686454	0.762559	0.995001	0
ENSMUSG00000026398.14	Nr5a2	chr1	136948826	136948859	136952101	136952164	136960226	136960380	0.10734	0.116596	0.0822047	0.283944	0.896772	0
ENSMUSG00000026393.10	Nek7	chr1	138484111	138487110	138498339	138498503	138498575	138498689	0.000655725	0.00263113	0.00417172	0.85665	0.999593	0
ENSMUSG00000026393.10	Nek7	chr1	138484111	138487110	138498339	138498689	138515624	138515732	0.034058	0.0222822	0.102479	0.712072	0.978451	0
ENSMUSG00000026393.10	Nek7	chr1	138484111	138487110	138498387	138498503	138498575	138498689	0.00228624	0.00198014	0.00457031	0.562495	0.944741	0
ENSMUSG00000026393.10	Nek7	chr1	138484111	138487110	138498387	138498689	138515624	138515732	0.0218463	0.0687215	0.0947242	0.776555	0.999563	0
ENSMUSG00000026393.10	Nek7	chr1	138484111	138487110	138498575	138498689	138502570	138502665	0.00322535	0.00268112	0.00443761	0.424955	0.930234	0
ENSMUSG00000026393.10	Nek7	chr1	138484111	138487110	138498575	138498689	138515624	138515732	0.0899893	0.143164	0.0902378	0.443175	0.930278	0
ENSMUSG00000026393.10	Nek7	chr1	138484111	138487110	138498575	138498762	138502570	138502665	0.0912393	0.0612473	0.0728278	0.215081	0.896772	0
ENSMUSG00000026393.10	Nek7	chr1	138484111	138487110	138498575	138498762	138515624	138515732	0.0424242	0.0181818	0.0857099	0.569036	0.946564	0
ENSMUSG00000026393.10	Nek7	chr1	138484111	138487110	138502570	138502665	138515624	138515732	0.00669192	0.114016	0.0781622	0.964585	0.999593	0
ENSMUSG00000026393.10	Nek7	chr1	138498575	138498689	138502570	138502665	138515624	138515732	0.00243176	0.0103064	0.0113007	0.819664	0.999593	0
ENSMUSG00000026393.10	Nek7	chr1	138498575	138498762	138502570	138502665	138515624	138515732	0.0299145	0.0222058	0.06396	0.57533	0.946848	0
ENSMUSG00000026365.15	Cfh	chr1	140088657	140088840	140098869	140099046	140100807	140100984	0.0163502	0.0163333	0.0136639	0.281992	0.896772	0
ENSMUSG00000026365.15	Cfh	chr1	140101584	140101758	140102336	140102546	140102707	140102855	0.0662648	0.0261327	0.051534	0.206556	0.896772	0
ENSMUSG00000026365.15	Cfh	chr1	140108757	140108943	140112432	140112606	140118586	140118763	0.0932065	0.116358	0.0376611	0.273614	0.896772	0
ENSMUSG00000026361.9	Cdc73	chr1	143627845	143627881	143635031	143635089	143667624	143667689	0.014571	0.0301346	0.0315196	0.630992	0.957346	0
ENSMUSG00000026361.9	Cdc73	chr1	143671329	143671428	143675159	143675230	143677638	143677855	0.00317674	0.00411805	0.00328135	0.383877	0.914938	0
ENSMUSG00000026361.9	Cdc73	chr1	143671329	143671428	143677638	143677855	143685922	143686011	0.000845713	0.00390495	0.003682	0.817106	0.999593	0
ENSMUSG00000026361.9	Cdc73	chr1	143677638	143677855	143685922	143686011	143691274	143691327	0.00935642	0.00640775	0.0011995	0.0827378	0.896772	0
ENSMUSG00000026361.9	Cdc73	chr1	143691413	143691476	143695392	143695462	143702493	143702624	1.11022e-16	0.217571	1.11022e-16	0.918093	0.999593	0
ENSMUSG00000026361.9	Cdc73	chr1	143695392	143695462	143699216	143699322	143702493	143702624	0.0272062	0.0263475	0	0.173367	0.896772	0
ENSMUSG00000051079.8	Rgs13	chr1	144138666	144139683	144140709	144140876	144167286	144167348	0.0251961	0.0114119	0	0.0320254	0.896772	0
ENSMUSG00000051079.8	Rgs13	chr1	144140709	144140876	144150346	144150375	144167286	144167348	0.0189289	0.0172652	0	0.153363	0.896772	0
ENSMUSG00000051079.8	Rgs13	chr1	144140709	144140876	144167286	144167348	144171416	144171486	0.00457187	0.00296699	0.0277297	0.844908	0.999593	0
ENSMUSG00000051079.8	Rgs13	chr1	144140709	144140876	144167286	144167348	144175825	144175894	5.55112e-17	0.14585	5.55112e-17	0.931797	0.999593	0
ENSMUSG00000051079.8	Rgs13	chr1	144140709	144140876	144171416	144171486	144175825	144175894	0	0.0471405	0	0.976306	0.999593	0
ENSMUSG00000051079.8	Rgs13	chr1	144167286	144167348	144171416	144171486	144175825	144175894	0.0405589	0.0357378	0.014285	0.149736	0.896772	0
ENSMUSG00000056220.14	Pla2g4a	chr1	149902293	149902442	149922054	149922136	149932657	149932756	0.0054625	0.00782237	0.00160342	0.316956	0.89704	0
ENSMUSG00000056220.14	Pla2g4a	chr1	149922054	149922136	149932657	149932756	149961190	149961255	0.0172904	0.0223879	0.013279	0.3288	0.89975	0
ENSMUSG00000006010.14	Odr4	chr1	150380311	150380377	150381498	150381594	150382267	150382408	0.00971945	0.0295236	0.0103605	0.624608	0.954643	0
ENSMUSG00000052748.14	Swt1	chr1	151384316	151384504	151388619	151388768	151391435	151391574	0.0479798	0.0755759	0.0771185	0.530632	0.938396	0
ENSMUSG00000052748.14	Swt1	chr1	151397205	151397351	151401079	151401173	151402954	151403027	0.0634549	0.0442959	0.164437	0.624732	0.954718	0
ENSMUSG00000026484.13	Rnf2	chr1	151473071	151473344	151476139	151476355	151476871	151477032	0.00419541	0.0297672	0.00333549	0.815849	0.999593	0
ENSMUSG00000014980.14	Tsen15	chr1	152383344	152383397	152383698	152383780	152386458	152386688	0.0179426	0.0191761	0	0.203898	0.896772	0
ENSMUSG00000042772.15	Smg7	chr1	152841512	152841593	152843229	152843379	152844035	152844398	0.00540359	0.052738	0.00890782	0.842049	0.999593	0
ENSMUSG00000042772.15	Smg7	chr1	152848733	152848843	152848994	152849016	152849874	152849994	0.0364583	0.353898	0.357521	0.909983	0.999593	0
ENSMUSG00000042772.15	Smg7	chr1	152860449	152860521	152860762	152860865	152861680	152861852	0.00666677	0.0449479	0.00454542	0.786801	0.999593	0
ENSMUSG00000042772.15	Smg7	chr1	152866580	152866713	152867683	152867739	152868251	152868369	0.0116414	0.0124489	0	0.203286	0.896772	0
ENSMUSG00000042772.15	Smg7	chr1	152866580	152866713	152867683	152867767	152868251	152868369	0.015841	0.00774184	0.011719	0.1872	0.896772	0
ENSMUSG00000026479.13	Lamc2	chr1	153127053	153127164	153128648	153128748	153128956	153129156	0.000593373	0.000509893	0.000589289	0.311721	0.896772	0
ENSMUSG00000026479.13	Lamc2	chr1	153133598	153133748	153134097	153134197	153134776	153134814	0.000270562	0.000384124	0.00057351	0.597273	0.949574	0
ENSMUSG00000026479.13	Lamc2	chr1	153134776	153134856	153136583	153136903	153139725	153139858	0.215526	0.196122	0.0870858	0.1683	0.896772	0
ENSMUSG00000026479.13	Lamc2	chr1	153134776	153134856	153136697	153136903	153139725	153139858	0.245262	0.29121	0.124646	0.290037	0.896772	0
ENSMUSG00000026479.13	Lamc2	chr1	153136697	153136903	153137190	153137353	153139725	153139858	0.00564376	0.00744939	0.00164049	0.284681	0.896772	0
ENSMUSG00000026479.13	Lamc2	chr1	153158851	153158987	153166103	153166307	153185908	153186047	0.0138288	0	0.00107159	0.00295074	0.896772	0
ENSMUSG00000026479.13	Lamc2	chr1	153158851	153158987	153166118	153166307	153185908	153186047	0.0104201	0.0239954	0.0135026	0.56784	0.946564	0
ENSMUSG00000042699.11	Dhx9	chr1	153475662	153475709	153476423	153476562	153478040	153478139	0.0877111	0.0606317	0.0694822	0.218939	0.896772	0
ENSMUSG00000042699.11	Dhx9	chr1	153478865	153478981	153481131	153481249	153482741	153482882	0.00218861	0.009174	0.00439538	0.736072	0.984935	0
ENSMUSG00000042699.11	Dhx9	chr1	153482741	153482882	153483739	153483872	153487532	153487608	0.000992834	0.00534584	0.00576894	0.855446	0.999593	0
ENSMUSG00000033722.9	BC034090	chr1	155221334	155221587	155223274	155223431	155224910	155225174	0.0607639	0.0712229	0.0491046	0.311613	0.896772	0
ENSMUSG00000026469.14	Xpr1	chr1	155332116	155332386	155340292	155340397	155345552	155345654	0.00693604	0.00907218	0.00501494	0.32428	0.898112	0
ENSMUSG00000026469.14	Xpr1	chr1	155332162	155332386	155345552	155345654	155384610	155384662	0.000211465	0.0119178	0.0100299	0.984642	0.999593	0
ENSMUSG00000033684.14	Qsox1	chr1	155783469	155783525	155786793	155786923	155789297	155789432	0.013913	0.00515025	0.0213578	0.453023	0.930278	0
ENSMUSG00000033684.14	Qsox1	chr1	155794545	155794648	155795350	155795395	155803696	155803797	0.0569444	0.0245351	0.0460181	0.224294	0.896772	0
ENSMUSG00000033684.14	Qsox1	chr1	155794545	155794648	155795350	155795396	155803696	155803797	0.00315065	0.0156558	0.0140383	0.823863	0.999593	0
ENSMUSG00000033671.18	Cep350	chr1	155863327	155863611	155866039	155866122	155868670	155868807	0.0188542	0.0229557	0.0326716	0.529342	0.937987	0
ENSMUSG00000033671.18	Cep350	chr1	155868735	155868807	155871908	155872069	155875321	155875466	0.00745057	0.00340955	0.00706667	0.271304	0.896772	0
ENSMUSG00000033671.18	Cep350	chr1	155885906	155886106	155894593	155894754	155897434	155897581	0.00265422	0.00679853	0.00709279	0.6973	0.973111	0
ENSMUSG00000033671.18	Cep350	chr1	155959719	155959831	155961143	155961187	155962474	155962560	0.0385845	0.0158742	0.0260086	0.15862	0.896772	0
ENSMUSG00000033671.18	Cep350	chr1	155959719	155959831	155961143	155961190	155962474	155962560	0.0658926	0.0347288	0.0603539	0.259167	0.896772	0
ENSMUSG00000026466.16	Tor1aip1	chr1	156007571	156007709	156013317	156013374	156017510	156017579	0.00153616	0.0136916	0.0165594	0.918031	0.999593	0
ENSMUSG00000026466.16	Tor1aip1	chr1	156031413	156031473	156032614	156032686	156033725	156033800	0.000166179	0.00307537	0.00274605	0.951956	0.999593	0
ENSMUSG00000026600.12	Soat1	chr1	156457945	156458004	156466657	156466794	156474147	156474197	0.0570246	0.0902789	0.0982093	0.53796	0.940518	0
ENSMUSG00000026600.12	Soat1	chr1	156457945	156458004	156466657	156466798	156474147	156474197	0.119526	0.114153	0.0530923	0.177172	0.896772	0
ENSMUSG00000026600.12	Soat1	chr1	156457945	156458004	156466680	156466798	156474147	156474197	0.0328513	0.0197471	0.0163615	0.103265	0.896772	0
ENSMUSG00000060519.11	Tor3a	chr1	156666691	156666777	156669370	156669636	156673529	156673646	0.0106168	0.0113951	0.0122667	0.383909	0.914938	0
ENSMUSG00000033557.17	Fam20b	chr1	156690476	156690648	156698726	156698836	156702398	156702485	0.0262295	0.0302592	0.00399495	0.230446	0.896772	0
ENSMUSG00000033557.17	Fam20b	chr1	156702398	156702485	156703237	156703282	156705667	156706167	0.0041904	0.0136025	0.00518027	0.656342	0.963993	0
ENSMUSG00000033557.17	Fam20b	chr1	156705667	156706167	156716887	156716980	156718865	156719072	0.0264854	0.0433565	0.0253589	0.441152	0.930278	0
ENSMUSG00000033557.17	Fam20b	chr1	156705667	156706167	156716941	156716980	156718865	156719072	0.00413454	0.0237518	0.0135461	0.820832	0.999593	0
ENSMUSG00000026594.14	Ralgps2	chr1	156811444	156811536	156813437	156813543	156817740	156817833	0.0298723	0.0428316	0.0681262	0.629517	0.956488	0
ENSMUSG00000026594.14	Ralgps2	chr1	156819812	156819918	156821386	156821464	156823990	156824045	0.0362454	0.0642491	0.0493462	0.5039	0.930962	0
ENSMUSG00000026594.14	Ralgps2	chr1	156887946	156888030	156892907	156893012	156900585	156900636	0.00860381	0.0207842	0.0177497	0.643853	0.961373	0
ENSMUSG00000026594.14	Ralgps2	chr1	156887946	156888030	156898000	156898121	156900585	156900636	0.0102321	0.0130856	0	0.267578	0.896772	0
ENSMUSG00000026594.14	Ralgps2	chr1	156900597	156900636	156901785	156901890	156907638	156907718	0.00741441	0.012134	0.00670429	0.420649	0.927519	0
ENSMUSG00000070565.11	Rasal2	chr1	157147629	157147832	157149772	157149907	157156905	157157767	0.00278054	0.0108934	0.00496215	0.715547	0.97932	0
ENSMUSG00000070565.11	Rasal2	chr1	157177645	157177744	157179098	157179252	157192746	157192856	0.0331633	0	0.0350398	0.314099	0.896772	0
ENSMUSG00000070565.11	Rasal2	chr1	157230038	157230145	157286730	157286854	157299136	157299264	0.0247248	0.0280716	0.00798991	0.229804	0.896772	0
ENSMUSG00000026721.16	Rabgap1l	chr1	160226659	160226682	160231795	160231867	160236625	160236709	0.0001039	0.015438	0.00194893	0.996369	0.999593	0
ENSMUSG00000026721.16	Rabgap1l	chr1	160307175	160307398	160307619	160307911	160308977	160309171	0.158951	0.072652	0.128451	0.19054	0.896772	0
ENSMUSG00000026721.16	Rabgap1l	chr1	160702357	160702460	160710146	160710213	160722132	160722243	0.0399254	0.0131216	0.00572553	0.00742022	0.896772	0
ENSMUSG00000026721.16	Rabgap1l	chr1	160740751	160740799	160740883	160740931	160792735	160792938	0.06875	0.0350269	0	0.0446092	0.896772	0
ENSMUSG00000043467.19	Zbtb37	chr1	161019483	161020406	161029641	161029741	161031804	161032761	0.0165976	0.161331	0.0811009	0.928291	0.999593	0
ENSMUSG00000043467.19	Zbtb37	chr1	161032437	161032761	161034087	161034284	161034777	161034816	0.0540895	0.122244	0.0390828	0.552222	0.943411	0
ENSMUSG00000043467.19	Zbtb37	chr1	161031804	161032764	161034087	161034284	161034777	161034816	0.00648148	0.129666	0.00523783	0.990894	0.999593	0
ENSMUSG00000026709.10	Dars2	chr1	161046776	161046929	161049937	161050000	161051330	161051438	0.0996972	0.0583017	0.077689	0.214803	0.896772	0
ENSMUSG00000026701.15	Prdx6	chr1	161244195	161244342	161247256	161247413	161251021	161251166	0.000272909	0.0248913	0.00623666	0.993856	0.999593	0
ENSMUSG00000026701.15	Prdx6	chr1	161247256	161247413	161249358	161249469	161251021	161251166	0.00250463	0.0030461	0.00162806	0.2891	0.896772	0
ENSMUSG00000040297.12	Suco	chr1	161816113	161818809	161819091	161819163	161820394	161820447	0.0272593	0.00435189	0.0164347	0.134492	0.896772	0
ENSMUSG00000040297.12	Suco	chr1	161820394	161820447	161827299	161827393	161827656	161827748	0.0514706	0.038207	0.0415945	0.227863	0.896772	0
ENSMUSG00000040297.12	Suco	chr1	161820394	161820447	161827299	161827397	161827656	161827748	0.0285948	0.177201	0.0231081	0.883577	0.999593	0
ENSMUSG00000040297.12	Suco	chr1	161820394	161820450	161827299	161827393	161827656	161827748	0.021686	0	0.0153404	0.183608	0.896772	0
ENSMUSG00000040297.12	Suco	chr1	161820394	161820450	161827299	161827397	161827656	161827748	0.00638275	0.0287584	0.0168222	0.776316	0.999526	0
ENSMUSG00000040297.12	Suco	chr1	161845302	161845358	161845559	161845580	161847204	161847310	0.167883	0.070644	0.00962142	0.026366	0.896772	0
ENSMUSG00000026694.19	Eef1aknmt	chr1	162537118	162537331	162538831	162538999	162542257	162542453	0.00670498	0.0149315	0.00270922	0.497501	0.930962	0
ENSMUSG00000040225.15	Prrc2c	chr1	162680759	162680896	162681220	162681333	162682317	162682521	0.0117922	0.0153374	0.00316107	0.278364	0.896772	0
ENSMUSG00000040225.15	Prrc2c	chr1	162680759	162680896	162681220	162681357	162682317	162682521	0.142917	0.128799	0.0577471	0.144326	0.896772	0
ENSMUSG00000040225.15	Prrc2c	chr1	162684054	162684256	162688115	162688217	162691140	162691233	0.00399842	0.013393	0.0135991	0.761003	0.994888	0
ENSMUSG00000040225.15	Prrc2c	chr1	162684054	162684256	162688115	162688217	162692372	162692617	0.0572917	0.042528	0.0462987	0.228801	0.896772	0
ENSMUSG00000040225.15	Prrc2c	chr1	162684054	162684256	162691140	162691233	162692372	162692617	0.130366	0.111441	0.178073	0.426667	0.930278	0
ENSMUSG00000040225.15	Prrc2c	chr1	162688115	162688217	162691140	162691233	162692372	162692617	0.00901381	0.00811391	0.015852	0.516501	0.933084	0
ENSMUSG00000040225.15	Prrc2c	chr1	162710366	162710829	162713303	162713357	162714242	162714387	0.00384956	0.00945994	0.00672368	0.616832	0.952419	0
ENSMUSG00000040225.15	Prrc2c	chr1	162715585	162715719	162716278	162716361	162718689	162718910	0.00116229	0.0172652	0.00357439	0.911646	0.999593	0
ENSMUSG00000040225.15	Prrc2c	chr1	162720544	162720606	162721429	162721539	162723109	162723281	0.00570681	0.00523355	0.00350919	0.204291	0.896772	0
ENSMUSG00000040225.15	Prrc2c	chr1	162720544	162720606	162721444	162721539	162723109	162723281	0.018577	0.0269516	0.0223325	0.44382	0.930278	0
ENSMUSG00000040225.15	Prrc2c	chr1	162724703	162724869	162730225	162730435	162740324	162740487	2.17149e-05	0.00101659	0.00135721	0.985932	0.999593	0
ENSMUSG00000040225.15	Prrc2c	chr1	162724703	162724869	162732882	162733009	162740324	162740350	0.000581994	0.00196155	0.000778538	0.667207	0.965954	0
ENSMUSG00000040225.15	Prrc2c	chr1	162724703	162724869	162735644	162735691	162740324	162740350	0.000871256	0.00137951	0.000475206	0.370967	0.910985	0
ENSMUSG00000041406.14	BC055324	chr1	163957492	163957597	163959104	163959178	163959287	163959401	0.0625	0.0267857	0.0910539	0.438298	0.930278	0
ENSMUSG00000026577.13	Blzf1	chr1	164302283	164302720	164303847	164303924	164306438	164306516	0.0524947	0.0243022	0.021347	0.0570954	0.896772	0
ENSMUSG00000026577.13	Blzf1	chr1	164302283	164302720	164303903	164303924	164306438	164306516	0.00963702	0.0339553	0.0381345	0.791775	0.999593	0
ENSMUSG00000026576.12	Atp1b1	chr1	164441458	164441641	164442292	164442451	164443194	164443350	0.0003338	0.000212464	0.000757581	0.600253	0.94996	0
ENSMUSG00000040848.11	Sft2d2	chr1	165185007	165185089	165187968	165188054	165188247	165188334	0.00158432	0.0768666	0.0608155	0.972814	0.999593	0
ENSMUSG00000026571.12	Dcaf6	chr1	165333288	165333394	165336744	165336833	165338187	165338344	0.0847927	0.0926743	0.0340706	0.221914	0.896772	0
ENSMUSG00000026571.12	Dcaf6	chr1	165339884	165340023	165346742	165346834	165350883	165351280	0.0132744	0.0135316	0.0069493	0.210411	0.896772	0
ENSMUSG00000026571.12	Dcaf6	chr1	165351960	165352076	165355524	165355612	165357428	165357546	0.00729663	0.0254512	0.000103265	0.670151	0.966508	0
ENSMUSG00000026571.12	Dcaf6	chr1	165351960	165352076	165357428	165357546	165388657	165388746	0.00078964	0.0162624	0.0140082	0.957139	0.999593	0
ENSMUSG00000026571.12	Dcaf6	chr1	165357428	165357546	165367445	165367505	165371122	165371248	0.0577548	0.181178	0.0750948	0.60259	0.950077	0
ENSMUSG00000026571.12	Dcaf6	chr1	165357428	165357546	165367445	165367505	165388657	165388746	0.012072	0.0344589	0.0317417	0.706707	0.97675	0
ENSMUSG00000026571.12	Dcaf6	chr1	165357428	165357546	165371122	165371248	165388657	165388746	0.0182238	0.0264392	0.0235284	0.461413	0.930278	0
ENSMUSG00000026571.12	Dcaf6	chr1	165367445	165367505	165371122	165371248	165388657	165388746	0.00968885	0.251135	0.300815	0.953238	0.999593	0
ENSMUSG00000026571.12	Dcaf6	chr1	165399653	165399868	165411463	165411599	165420110	165420224	0.019429	0.0339591	0.0190194	0.448059	0.930278	0
ENSMUSG00000026566.15	Mpzl1	chr1	165593653	165593677	165601749	165601855	165604609	165604742	0.207892	0.0351375	0.0486419	0.00709664	0.896772	0
ENSMUSG00000026566.15	Mpzl1	chr1	165593653	165593677	165601749	165601864	165604609	165604742	0.025613	0.0105621	0.00601855	0.0194205	0.896772	0
ENSMUSG00000026566.15	Mpzl1	chr1	165593653	165593677	165604609	165604742	165605608	165605753	0.0079418	0.00489688	0.0129065	0.48031	0.930278	0
ENSMUSG00000026566.15	Mpzl1	chr1	165593653	165593677	165605608	165605822	165608437	165608529	0.013881	0.0355043	0.0527792	0.772246	0.99826	0
ENSMUSG00000026566.15	Mpzl1	chr1	165601815	165601855	165603550	165603901	165604609	165604742	0.0116577	0	0.0048488	0.0761694	0.896772	0
ENSMUSG00000026566.15	Mpzl1	chr1	165601815	165601855	165604609	165604742	165605608	165605753	0.00418452	0.00705232	0.00683444	0.541594	0.941452	0
ENSMUSG00000026565.18	Pou2f1	chr1	165875902	165876048	165876976	165877065	165880129	165880160	0.0556028	0.0713041	0.0871412	0.502036	0.930962	0
ENSMUSG00000026565.18	Pou2f1	chr1	165880129	165880475	165883046	165883118	165891809	165891915	0.075966	0.0921374	0.049679	0.290641	0.896772	0
ENSMUSG00000026565.18	Pou2f1	chr1	165908879	165909006	165911287	165911476	165913226	165913349	0.002135	0.024329	0.0171005	0.909592	0.999593	0
ENSMUSG00000026565.18	Pou2f1	chr1	165913226	165913349	165915109	165915163	165916921	165917022	0.0145822	0.0202877	0.00351794	0.304063	0.896772	0
ENSMUSG00000026565.18	Pou2f1	chr1	165931698	165931727	165937209	165937263	165945901	165946002	0	0.206276	0	0.890736	0.999593	0
ENSMUSG00000026565.18	Pou2f1	chr1	165931698	165931727	165945901	165946002	165952780	165952856	0	0.0964237	0	0.945964	0.999593	0
ENSMUSG00000026565.18	Pou2f1	chr1	165931698	165931727	165945901	165946002	166002561	166002609	0.0109074	0.0280908	0.0294598	0.702073	0.974796	0
ENSMUSG00000026565.18	Pou2f1	chr1	165931698	165931727	165952780	165952856	166002561	166002609	0.0230585	0.0126483	0.0157733	0.163294	0.896772	0
ENSMUSG00000026565.18	Pou2f1	chr1	165931698	165931727	165964780	165964823	166002561	166002609	0.0202498	0.0326978	0.0103605	0.377791	0.912475	0
ENSMUSG00000040596.15	Pogk	chr1	166408398	166408532	166408997	166409232	166409706	166409782	0.0178944	0.085721	0.0691434	0.819981	0.999593	0
ENSMUSG00000040596.15	Pogk	chr1	166408398	166408532	166408997	166409235	166409706	166409782	0.0274351	0.0154647	0.0514259	0.537233	0.940376	0
ENSMUSG00000040596.15	Pogk	chr1	166408398	166408532	166408997	166409331	166409706	166409782	0.0157022	0.0850469	0.0427786	0.775909	0.999526	0
ENSMUSG00000026558.13	Uck2	chr1	167227731	167227780	167229892	167229990	167234691	167234834	0.0178989	0.0138473	0.0108228	0.167503	0.896772	0
ENSMUSG00000026558.13	Uck2	chr1	167229892	167229990	167234691	167234834	167236602	167236699	0.000118613	0.00383197	0.00329654	0.972326	0.999593	0
ENSMUSG00000026688.5	Mgst3	chr1	167371965	167372642	167373298	167373370	167373792	167373865	0.0194722	0.0178452	0.00895072	0.17249	0.896772	0
ENSMUSG00000026688.5	Mgst3	chr1	167371965	167372642	167373327	167373370	167373792	167373865	0.0210779	0.029328	0	0.299165	0.896772	0
ENSMUSG00000052534.15	Pbx1	chr1	168158731	168158824	168183529	168183619	168191277	168191437	0.00503372	0.00676582	0.012643	0.643445	0.961179	0
ENSMUSG00000052534.15	Pbx1	chr1	168183572	168183619	168184955	168185068	168191277	168191437	0.0117703	0.0131244	0.0148822	0.415589	0.925754	0
ENSMUSG00000052534.15	Pbx1	chr1	168195747	168195883	168201896	168201990	168203346	168203537	0.00229687	0.00671338	0.00872971	0.771062	0.998103	0
ENSMUSG00000052534.15	Pbx1	chr1	168195747	168195883	168201896	168202214	168203346	168203537	0.00085121	0.00616412	0.0067605	0.893647	0.999593	0
ENSMUSG00000026683.14	Nuf2	chr1	169525311	169525449	169528735	169528811	169531321	169531411	0.200556	0.117976	0.0392837	0.0657584	0.896772	0
ENSMUSG00000026675.12	Hsd17b7	chr1	169955934	169956033	169959422	169959479	169959686	169959791	0.0226749	0.0403502	0.0502992	0.629383	0.956449	0
ENSMUSG00000026675.12	Hsd17b7	chr1	169961004	169961199	169964390	169964505	169965686	169965723	0.0260367	0.04047	0.014285	0.362527	0.908825	0
ENSMUSG00000026670.15	Uap1	chr1	170143396	170143463	170147995	170148043	170149270	170149459	0.0551395	0.0745278	0.0352415	0.312642	0.896772	0
ENSMUSG00000026670.15	Uap1	chr1	170143396	170143463	170147995	170148046	170149270	170149459	0.0864705	0.0829223	0.0386395	0.188848	0.896772	0
ENSMUSG00000026670.15	Uap1	chr1	170149270	170149459	170150311	170150452	170150942	170151136	0.0022878	0.00657503	0.00213305	0.605494	0.950084	0
ENSMUSG00000026670.15	Uap1	chr1	170150311	170150452	170150942	170151136	170156923	170157096	0.00401116	0.00404603	0	0.184468	0.896772	0
ENSMUSG00000026670.15	Uap1	chr1	170158750	170158926	170161366	170161571	170166625	170166948	0.00472388	0.0112129	0.007323	0.594925	0.948449	0
ENSMUSG00000026670.15	Uap1	chr1	170158750	170158926	170161366	170161586	170166625	170166948	0.204215	0.332435	0.0825151	0.372647	0.910985	0
ENSMUSG00000026670.15	Uap1	chr1	170166625	170166948	170173407	170173473	170174749	170174766	0.00177679	0.00554329	0.0053266	0.735753	0.984846	0
ENSMUSG00000026667.14	Uhmk1	chr1	170193419	170200013	170205114	170205203	170207113	170207212	0.0320011	0.00673455	0.0108964	0.0326159	0.896772	0
ENSMUSG00000026667.14	Uhmk1	chr1	170205114	170205203	170207113	170207212	170207345	170207422	0.012965	0.00451291	0.00239292	0.00965009	0.896772	0
ENSMUSG00000026667.14	Uhmk1	chr1	170207345	170207422	170208654	170208749	170211030	170211222	0.018585	0.0161017	0.0043597	0.138687	0.896772	0
ENSMUSG00000038473.14	Nos1ap	chr1	170390730	170390823	170514614	170514686	170589259	170589297	0.00394965	0.00982355	0.0158617	0.772328	0.99826	0
ENSMUSG00000026659.13	Dusp12	chr1	170880129	170880226	170880572	170880691	170880914	170881028	0.0677751	0.148509	0.1489	0.647321	0.962263	0
ENSMUSG00000026659.13	Dusp12	chr1	170880129	170880226	170880914	170881028	170885066	170885199	0.106061	0.0787296	0.0857099	0.241877	0.896772	0
ENSMUSG00000026656.15	Fcgr2b	chr1	170961195	170961233	170963324	170963465	170965701	170965824	0.059899	0.0503968	0.0802045	0.412158	0.923875	0
ENSMUSG00000026656.15	Fcgr2b	chr1	170961195	170961233	170963408	170963465	170965701	170965824	0.0233333	0.0818535	0.0288033	0.697568	0.973156	0
ENSMUSG00000058076.12	Sdhc	chr1	171138693	171138755	171143557	171143659	171145755	171145812	0.0129131	0.0389225	0.0133606	0.636093	0.959244	0
ENSMUSG00000013593.12	Ndufs2	chr1	171234852	171235087	171235272	171235330	171236356	171236440	0.019313	0.00646088	0.0198751	0.301286	0.896772	0
ENSMUSG00000013593.12	Ndufs2	chr1	171238286	171238372	171238514	171238592	171238709	171238897	0.00191374	0.00222158	0.0011316	0.264286	0.896772	0
ENSMUSG00000062963.10	Ufc1	chr1	171288776	171288971	171289170	171289261	171289517	171289594	0.013253	0.0189512	0.00601943	0.322049	0.897673	0
ENSMUSG00000013997.10	Nit1	chr1	171343693	171343827	171344063	171344167	171344287	171345482	0.00225127	0.0106917	0.00554594	0.769806	0.997939	0
ENSMUSG00000013997.10	Nit1	chr1	171344913	171345000	171345190	171345312	171345567	171345645	0.022814	0.0287726	0	0.261087	0.896772	0
ENSMUSG00000026556.15	Vangl2	chr1	172007910	172008046	172008506	172008643	172009440	172010048	0.0230002	0.0283302	0.0140718	0.287227	0.896772	0
ENSMUSG00000003458.12	Ncstn	chr1	172074914	172075036	172075404	172075528	172081211	172081316	0.00650312	0.00699928	0	0.206072	0.896772	0
ENSMUSG00000003458.12	Ncstn	chr1	172075404	172075528	172075625	172075740	172081211	172081316	0.00542274	0.00453149	0.00498814	0.284035	0.896772	0
ENSMUSG00000013698.12	Pea15a	chr1	172200482	172200581	172204245	172204464	172206596	172206697	0.000576785	0.00208022	0.00282651	0.819303	0.999593	0
ENSMUSG00000013698.12	Pea15a	chr1	172199774	172200617	172204245	172204464	172206596	172206697	0.00342607	0.00449856	0.00138434	0.288312	0.896772	0
ENSMUSG00000102278.1	Gm37145	chr1	172388233	172389519	172390547	172390647	172390876	172390989	0.127525	0.0897339	0.103056	0.216994	0.896772	0
ENSMUSG00000026536.9	Ifi211	chr1	173905472	173905631	173906131	173906322	173907596	173907881	0.0244277	0.0514897	0.0628539	0.67921	0.968429	0
ENSMUSG00000026536.9	Ifi211	chr1	173905472	173905631	173906131	173906328	173907596	173907881	0.00408974	0.00901067	0.0104757	0.676582	0.967561	0
ENSMUSG00000039997.16	Ifi203	chr1	173936517	173936639	173937741	173938026	173942229	173942294	0	0.0785674	0	0.973518	0.999593	0
ENSMUSG00000026535.9	Ifi202b	chr1	173974732	173975146	173977264	173977434	173982673	173982744	0.0387618	0.138493	0.0313243	0.702672	0.975015	0
ENSMUSG00000026535.9	Ifi202b	chr1	173974732	173975146	173977264	173977437	173982673	173982744	0.0675471	0.146889	0.0675015	0.499958	0.930962	0
ENSMUSG00000057335.11	Cep170	chr1	176758396	176758517	176761350	176761500	176769232	176769526	0.0244427	0.105747	0.021411	0.757843	0.993544	0
ENSMUSG00000057335.11	Cep170	chr1	176758396	176758517	176761350	176761500	176769712	176769870	0.0555926	0.0833138	0.0746742	0.482342	0.930861	0
ENSMUSG00000057335.11	Cep170	chr1	176758396	176758517	176769232	176769526	176769712	176769870	0.103467	0.0953588	0.0929731	0.277716	0.896772	0
ENSMUSG00000057335.11	Cep170	chr1	176761350	176761500	176769232	176769526	176769712	176769870	0.0990414	0.069078	0.0792453	0.224947	0.896772	0
ENSMUSG00000057335.11	Cep170	chr1	176774487	176774910	176780219	176780395	176782250	176782300	0	0	0.0445362	0.980558	0.999593	0
ENSMUSG00000057335.11	Cep170	chr1	176774487	176774910	176780260	176780395	176782250	176782300	0.0361147	0.0257542	0.0361867	0.302447	0.896772	0
ENSMUSG00000057335.11	Cep170	chr1	176788466	176788545	176792535	176792625	176793504	176793609	0.0304181	0.0379972	0.00185592	0.260879	0.896772	0
ENSMUSG00000057335.11	Cep170	chr1	176793504	176793649	176806998	176807135	176813533	176813733	0.0972222	0.0721688	0.0785674	0.224242	0.896772	0
ENSMUSG00000057335.11	Cep170	chr1	176793504	176793649	176806998	176807135	176813895	176814067	0.00242106	0.0301226	0.0175917	0.90304	0.999593	0
ENSMUSG00000019699.16	Akt3	chr1	177102961	177103106	177109418	177109478	177109626	177109738	0.0154852	0.0248078	0.0360807	0.63251	0.957992	0
ENSMUSG00000019699.16	Akt3	chr1	177102961	177103106	177109626	177109738	177130970	177131096	0.020166	0.0220558	0.0214275	0.362021	0.908825	0
ENSMUSG00000015961.8	Adss	chr1	177769924	177770516	177771140	177771265	177772071	177772184	0.0194444	0.00833333	0.0392837	0.55544	0.943411	0
ENSMUSG00000015961.8	Adss	chr1	177772071	177772226	177773574	177773701	177775580	177775662	0.0212059	0.0247705	0.0165585	0.302309	0.896772	0
ENSMUSG00000039630.10	Hnrnpu	chr1	178323619	178323713	178323965	178324016	178325242	178325313	0.0117155	0.0408942	0.0725238	0.866763	0.999593	0
ENSMUSG00000039630.10	Hnrnpu	chr1	178325242	178325313	178329221	178329407	178329867	178329939	0.0108025	0.0240563	0.00436486	0.501237	0.930962	0
ENSMUSG00000039630.10	Hnrnpu	chr1	178325242	178325313	178329285	178329407	178329867	178329939	0.0835905	0.160556	0.0406841	0.463985	0.930278	0
ENSMUSG00000039630.10	Hnrnpu	chr1	178335881	178335955	178336046	178336155	178336952	178336975	0.570262	0.284154	0.230421	0.0583503	0.896772	0
ENSMUSG00000039630.10	Hnrnpu	chr1	178335881	178335955	178336046	178336158	178336952	178336966	0.0154491	0.0022888	0	0.00135886	0.881905	0
ENSMUSG00000026492.11	Tfb2m	chr1	179531327	179531464	179532064	179532127	179533632	179533667	0.00234789	0.050125	0.0140002	0.928566	0.999593	0
ENSMUSG00000026492.11	Tfb2m	chr1	179542306	179542457	179544897	179544986	179545821	179545892	0.0360517	0.042092	0.0435367	0.407275	0.922474	0
ENSMUSG00000026492.11	Tfb2m	chr1	179544897	179544986	179545366	179545458	179545821	179545892	0.010788	0.0288066	0.0135982	0.605553	0.950084	0
ENSMUSG00000026491.13	Ahctf1	chr1	179753698	179754072	179754490	179754624	179755448	179755654	0.00983103	0.0116764	0	0.24001	0.896772	0
ENSMUSG00000026491.13	Ahctf1	chr1	179757934	179758029	179758661	179758765	179760261	179760361	0.00103209	0.0147618	0.0105934	0.934079	0.999593	0
ENSMUSG00000026491.13	Ahctf1	chr1	179765877	179766070	179768294	179768402	179768988	179769139	0.0178588	0.0581659	0.0222361	0.647096	0.962263	0
ENSMUSG00000026491.13	Ahctf1	chr1	179769308	179769459	179770588	179770720	179770798	179770918	0.00298132	0.0113446	0.0102479	0.773505	0.99895	0
ENSMUSG00000026491.13	Ahctf1	chr1	179793642	179793823	179795676	179795930	179799210	179799338	0.00741665	0.00275804	0.0127407	0.497855	0.930962	0
ENSMUSG00000026489.13	Coq8a	chr1	180174250	180174325	180178576	180178643	180178882	180178922	0	0.0257393	0	0.991653	0.999593	0
ENSMUSG00000060743.12	H3f3a	chr1	180803130	180803205	180803517	180803631	180810116	180810270	0.000258076	0.00103181	0.00181416	0.866792	0.999593	0
ENSMUSG00000026516.8	Nvl	chr1	181114082	181114301	181117433	181117685	181120354	181120499	0.102831	0.0763324	0.302907	0.7898	0.999593	0
ENSMUSG00000026516.8	Nvl	chr1	181114082	181114301	181117435	181117685	181120354	181120499	0.00383757	0.115105	0.0176576	0.996582	0.999593	0
ENSMUSG00000026516.8	Nvl	chr1	181123866	181123984	181126937	181127039	181129508	181129643	0.000374625	0.0190335	0.0160706	0.9834	0.999593	0
ENSMUSG00000038733.14	Wdr26	chr1	181177674	181177831	181178505	181178716	181181303	181181489	0.0329157	0.0138895	0.00656176	0.0182948	0.896772	0
ENSMUSG00000038733.14	Wdr26	chr1	181177674	181177831	181178505	181180648	181181303	181181489	0.0367179	0.0149835	0.00284267	0.0201892	0.896772	0
ENSMUSG00000038733.14	Wdr26	chr1	181177674	181177831	181180465	181180648	181181303	181181489	0.0013031	0.0053732	0.00474939	0.787173	0.999593	0
ENSMUSG00000038733.14	Wdr26	chr1	181177674	181177831	181180584	181180648	181181303	181181489	0.0187505	0	0.0133931	0.186191	0.896772	0
ENSMUSG00000038733.14	Wdr26	chr1	181177674	181177831	181181303	181181489	181182768	181182898	0.000695251	0.0127488	0.010324	0.950382	0.999593	0
ENSMUSG00000038733.14	Wdr26	chr1	181181303	181181489	181182392	181182566	181182768	181182898	0.00333951	0.00895466	0.0169367	0.820125	0.999593	0
ENSMUSG00000004880.11	Lbr	chr1	181817488	181817569	181818839	181819008	181819863	181819989	0.0459804	0.0127357	0.0754247	0.478097	0.930278	0
ENSMUSG00000022995.16	Enah	chr1	181908297	181908376	181911596	181911659	181913306	181913373	0.0687578	0.0147967	0.044039	0.151874	0.896772	0
ENSMUSG00000022995.16	Enah	chr1	181913306	181913373	181917198	181917247	181918257	181918315	0.00530196	0	0.0040521	0.205552	0.896772	0
ENSMUSG00000022995.16	Enah	chr1	181919558	181919629	181921657	181921768	181923559	181923764	0.0171873	0.0346309	0.0269139	0.564697	0.945192	0
ENSMUSG00000022995.16	Enah	chr1	181919558	181919629	181921657	181921828	181923559	181923764	0.0777778	0.057735	0.0628539	0.243477	0.896772	0
ENSMUSG00000022995.16	Enah	chr1	181919558	181919629	181921657	181921960	181923559	181923764	0.0349749	0.169519	0.0593335	0.804709	0.999593	0
ENSMUSG00000022995.16	Enah	chr1	181919558	181919629	181921657	181922500	181923559	181923764	0.176407	0.284191	0.0214275	0.333174	0.900193	0
ENSMUSG00000022995.16	Enah	chr1	181930677	181930762	181931173	181931185	181956393	181956571	0.000236873	0.00164435	0.0016776	0.883215	0.999593	0
ENSMUSG00000022995.16	Enah	chr1	181930677	181930762	181935659	181935716	181956393	181956571	0.00623223	0.00406557	0.00627581	0.299409	0.896772	0
ENSMUSG00000047539.9	Fbxo28	chr1	182317809	182318005	182326253	182326392	182329873	182329983	0.0174553	0.0088823	0.0190482	0.324063	0.898112	0
ENSMUSG00000026509.15	Capn2	chr1	182467259	182468235	182468339	182468509	182470178	182470237	0.00259924	0.0054516	0.000775336	0.472865	0.930278	0
ENSMUSG00000026509.15	Capn2	chr1	182470213	182470237	182470678	182470795	182472520	182472598	0.00683336	0.00604975	0.000863378	0.144504	0.896772	0
ENSMUSG00000026509.15	Capn2	chr1	182489964	182490048	182490866	182491035	182492061	182492195	0.00249398	0.00721688	0.00494881	0.667079	0.965954	0
ENSMUSG00000030768.12	Disp1	chr1	183098919	183099047	183099916	183100040	183107117	183107147	0.000105021	0.0326969	0.0574884	0.988873	0.999593	0
ENSMUSG00000030768.12	Disp1	chr1	183135457	183135876	183173495	183173623	183202951	183203039	0.00953789	0.115771	0.119591	0.932865	0.999593	0
ENSMUSG00000030768.12	Disp1	chr1	183135457	183135876	183173514	183173623	183202951	183203039	0.0268199	0.0114943	0.0216738	0.209745	0.896772	0
ENSMUSG00000046836.13	Brox	chr1	183281214	183281296	183282485	183282555	183284132	183284222	0.0225168	0.14489	0.157147	0.881045	0.999593	0
ENSMUSG00000046836.13	Brox	chr1	183281214	183281296	183282485	183282571	183284132	183284222	0.0319061	0.068052	0.0145649	0.478404	0.930278	0
ENSMUSG00000046836.13	Brox	chr1	183281214	183281296	183282489	183282555	183284132	183284222	0.145833	0.108253	0.117851	0.221512	0.896772	0
ENSMUSG00000046836.13	Brox	chr1	183285036	183285142	183286125	183286198	183287740	183287836	0.00498972	0.0349704	0.0237186	0.852837	0.999593	0
ENSMUSG00000046836.13	Brox	chr1	183291936	183292003	183292474	183292581	183294333	183294450	0.000568111	0.0267131	0.0129572	0.970179	0.999593	0
ENSMUSG00000046836.13	Brox	chr1	183291936	183292003	183292474	183292625	183294333	183294450	0.0279882	0.0207759	0.0272043	0.290815	0.896772	0
ENSMUSG00000056050.13	Mia3	chr1	183328203	183328345	183329585	183329657	183329745	183329819	0.0098203	0.0359446	0.00462688	0.654369	0.963468	0
ENSMUSG00000056050.13	Mia3	chr1	183328203	183328345	183329745	183329819	183329922	183329991	0.0433679	0.0585141	0.0299985	0.326603	0.899104	0
ENSMUSG00000056050.13	Mia3	chr1	183329922	183329991	183330796	183330934	183331091	183331192	0.0201219	0.0321063	0.0238527	0.45496	0.930278	0
ENSMUSG00000073481.9	Mtarc2	chr1	184822334	184822406	184822488	184822550	184832575	184832716	0.00178626	0.00595206	0.00233369	0.66189	0.964823	0
ENSMUSG00000073481.9	Mtarc2	chr1	184833859	184834028	184841253	184841427	184845545	184845847	0.00128148	0.00191064	0.00205728	0.520973	0.934498	0
ENSMUSG00000039246.8	Lyplal1	chr1	186089443	186089559	186100192	186100362	186114263	186114363	0.0882115	0.0485872	0.13329	0.446772	0.930278	0
ENSMUSG00000039239.14	Tgfb2	chr1	186649734	186649898	186690720	186690804	186704428	186705700	0.0345418	0.0256406	0.0324752	0.278937	0.896772	0
ENSMUSG00000001305.5	Rrp15	chr1	186736162	186736314	186737587	186737685	186739603	186739863	0.0278057	0.0374828	0.0614582	0.604647	0.950077	0
ENSMUSG00000026608.13	Kctd3	chr1	188974286	188974471	188976357	188976559	188978496	188978598	0	0	0.048601	0.98018	0.999593	0
ENSMUSG00000026608.13	Kctd3	chr1	188974286	188974471	188976357	188976707	188978496	188978598	0.194865	0.14465	0.0925292	0.120343	0.896772	0
ENSMUSG00000026608.13	Kctd3	chr1	188974286	188974471	188976370	188976559	188978496	188978598	0.204861	0.247583	0.0959895	0.249414	0.896772	0
ENSMUSG00000026608.13	Kctd3	chr1	188974286	188974471	188976370	188976707	188978496	188978598	0.296105	0.112039	0.228271	0.233192	0.896772	0
ENSMUSG00000026608.13	Kctd3	chr1	188974286	188974471	188976552	188976559	188978496	188978598	0.0151515	0.0112471	0.116803	0.824961	0.999593	0
ENSMUSG00000026608.13	Kctd3	chr1	188974286	188974471	188976552	188976707	188978496	188978598	0.00935829	0.00694673	0.168145	0.985516	0.999593	0
ENSMUSG00000026608.13	Kctd3	chr1	188974286	188974471	188976610	188976707	188978496	188978598	0.0227301	0.0352927	0.0375895	0.533357	0.93956	0
ENSMUSG00000026608.13	Kctd3	chr1	188983009	188983126	188983206	188983294	188987515	188987631	0.0295436	0.0199515	0.043832	0.45303	0.930278	0
ENSMUSG00000026608.13	Kctd3	chr1	188983206	188983294	188987515	188987631	188995741	188995832	0.0817664	0.0496683	0.129887	0.468103	0.930278	0
ENSMUSG00000026608.13	Kctd3	chr1	188987515	188987631	188992562	188992753	188995741	188995832	0.0460099	0.0132592	0.0164871	0.0333718	0.896772	0
ENSMUSG00000026608.13	Kctd3	chr1	188996961	188997042	188997276	188997335	189000252	189000326	0.0154758	0.0393641	0.0223328	0.595798	0.949181	0
ENSMUSG00000026605.14	Cenpf	chr1	189668515	189668638	189671047	189671176	189672508	189672634	0.0351425	0.0570402	0.0512932	0.512698	0.931723	0
ENSMUSG00000026605.14	Cenpf	chr1	189671047	189671176	189672508	189672634	189678938	189679141	0.0150655	0.0630565	0.0401195	0.751227	0.991285	0
ENSMUSG00000026605.14	Cenpf	chr1	189682844	189682951	189683767	189683964	189684944	189685138	0.00401993	0.048611	0.00564337	0.880818	0.999593	0
ENSMUSG00000026603.13	Smyd2	chr1	189888814	189888917	189891399	189891467	189896570	189896695	0.0218663	0.0405103	0.0294738	0.520773	0.934498	0
ENSMUSG00000026603.13	Smyd2	chr1	189897422	189897483	189899817	189899928	189909850	189909914	0.0230712	0.0235985	0.0221693	0.32308	0.897987	0
ENSMUSG00000089872.10	Rps6kc1	chr1	190810073	190810121	190834005	190834098	190844486	190844584	0.0281736	0.0514541	0.0354889	0.497687	0.930962	0
ENSMUSG00000089872.10	Rps6kc1	chr1	190844486	190844602	190871591	190871951	190885333	190885427	0.0130968	0.0416358	0.0314597	0.711922	0.978451	0
ENSMUSG00000089872.10	Rps6kc1	chr1	190885375	190885427	190888648	190888764	190899450	190899571	0.00952381	0.0371154	0.0168359	0.710369	0.978231	0
ENSMUSG00000089872.10	Rps6kc1	chr1	190899450	190899571	190905082	190905118	190911555	190911734	0.00987283	0.0289142	0.0246995	0.698399	0.973174	0
ENSMUSG00000037568.12	Vash2	chr1	190947647	190950256	190954294	190954357	190958613	190958729	0.0304048	0.00941332	0.0326373	0.315507	0.896772	0
ENSMUSG00000066595.9	Flvcr1	chr1	191015357	191015498	191020435	191020562	191021075	191021256	0.0648148	0.0277778	0.0523783	0.20337	0.896772	0
ENSMUSG00000066595.9	Flvcr1	chr1	191015357	191015498	191021075	191021256	191025376	191025967	0.0109954	0.0538709	0.0088856	0.765299	0.995598	0
ENSMUSG00000026628.13	Atf3	chr1	191172374	191172482	191173744	191177340	191183092	191183108	0.200595	0.0892758	0.246687	0.382838	0.914938	0
ENSMUSG00000026628.13	Atf3	chr1	191172374	191172482	191173744	191177344	191183092	191183108	0.200595	0.0892758	0.246687	0.382838	0.914938	0
ENSMUSG00000026628.13	Atf3	chr1	191172450	191172482	191177230	191177340	191183092	191183108	0.0553194	0.154307	0.0181557	0.632451	0.957992	0
ENSMUSG00000026628.13	Atf3	chr1	191172450	191172482	191177230	191177344	191183092	191183108	0.314616	0.0453002	0.351254	0.343563	0.902056	0
ENSMUSG00000026628.13	Atf3	chr1	191172450	191172482	191177230	191177474	191183092	191183108	0.00193718	0.0092494	0.00383148	0.759843	0.994428	0
ENSMUSG00000026628.13	Atf3	chr1	191177230	191177340	191177431	191177474	191183092	191183108	0.00727007	0.0441068	0.018567	0.8276	0.999593	0
ENSMUSG00000026628.13	Atf3	chr1	191177230	191177340	191177446	191177474	191183092	191183108	0.0807728	0.117064	0.0626776	0.347503	0.903606	0
ENSMUSG00000026628.13	Atf3	chr1	191177230	191177344	191177431	191177474	191183092	191183108	0.00550383	0.0251305	0.0260744	0.825781	0.999593	0
ENSMUSG00000026628.13	Atf3	chr1	191177230	191177344	191177446	191177474	191183092	191183108	0.220588	0	0.248131	0.320178	0.897673	0
ENSMUSG00000037499.9	Nenf	chr1	191306788	191307089	191309918	191310022	191311459	191311520	0.0211575	0.0203437	0.0232984	0.356173	0.905807	0
ENSMUSG00000026626.11	Ppp2r5a	chr1	191353873	191353975	191354530	191354658	191354741	191354861	0.0297677	0.0392782	0.00686511	0.282861	0.896772	0
ENSMUSG00000026626.11	Ppp2r5a	chr1	191354804	191354861	191355022	191355073	191356333	191356387	0.00908877	0.0155546	0.00188412	0.387499	0.916881	0
ENSMUSG00000037395.15	Rcor3	chr1	192100906	192101155	192101625	192101867	192108643	192108701	0.210297	0.134673	0.13316	0.141613	0.896772	0
ENSMUSG00000037395.15	Rcor3	chr1	192100906	192101155	192101625	192101867	192116268	192116346	0.123713	0.244216	0.0476564	0.376622	0.911934	0
ENSMUSG00000037395.15	Rcor3	chr1	192100906	192101155	192101751	192101867	192108643	192108701	0.166898	0.0892219	0.134874	0.193399	0.896772	0
ENSMUSG00000037395.15	Rcor3	chr1	192100906	192101155	192101751	192101867	192116268	192116346	0.0214229	0.0849117	0.11894	0.855057	0.999593	0
ENSMUSG00000037395.15	Rcor3	chr1	192100906	192101155	192108643	192108701	192116268	192116346	0.253077	0.15483	0.11392	0.103825	0.896772	0
ENSMUSG00000037395.15	Rcor3	chr1	192100906	192101155	192116268	192116346	192119914	192120133	0.133864	0.102352	0.0277297	0.106188	0.896772	0
ENSMUSG00000037395.15	Rcor3	chr1	192101751	192101867	192102100	192102235	192108643	192108701	0.00623779	0.161303	0.0725752	0.985515	0.999593	0
ENSMUSG00000037395.15	Rcor3	chr1	192101751	192101867	192102100	192102235	192116268	192116346	0.213984	0.197817	0.166616	0.262183	0.896772	0
ENSMUSG00000037395.15	Rcor3	chr1	192101751	192101867	192108643	192108701	192116268	192116346	0.226324	0.164818	0.0424518	0.0934896	0.896772	0
ENSMUSG00000037395.15	Rcor3	chr1	192102100	192102235	192108643	192108701	192116268	192116346	0.0675071	0.0692573	0.151837	0.637633	0.959303	0
ENSMUSG00000037395.15	Rcor3	chr1	192119914	192120133	192120900	192121107	192123538	192123617	0.000329615	0.0304879	0.0415945	0.984575	0.999593	0
ENSMUSG00000037395.15	Rcor3	chr1	192123538	192123617	192124242	192124367	192125865	192126027	0.00621193	0.0295465	0.0164316	0.771575	0.998103	0
ENSMUSG00000037395.15	Rcor3	chr1	192127989	192128028	192129823	192129937	192130382	192130460	0.0329551	0.0481934	0.0706339	0.588521	0.948071	0
ENSMUSG00000037395.15	Rcor3	chr1	192129823	192129937	192130382	192130460	192137432	192137489	0.0848485	0.149931	0.034284	0.403883	0.922474	0
ENSMUSG00000037375.16	Hhat	chr1	192748880	192748948	192759670	192759800	192770979	192770992	0.128206	0.17566	0.048766	0.304203	0.896772	0
ENSMUSG00000016262.14	Sertad4	chr1	192849750	192849866	192850951	192851100	192855442	192855486	0.0303819	0.0641006	0.0183273	0.478739	0.930278	0
ENSMUSG00000016262.14	Sertad4	chr1	192849750	192849866	192850951	192851143	192855442	192855486	0.0128721	0.0151774	0.00223414	0.2387	0.896772	0
ENSMUSG00000016181.9	Utp25	chr1	193107752	193107786	193113756	193113980	193114604	193114717	0.0553419	0.0410807	0.0242651	0.121082	0.896772	0
ENSMUSG00000016181.9	Utp25	chr1	193107752	193107786	193113756	193114002	193114604	193114717	0.0063979	0.0649519	0.0241333	0.869109	0.999593	0
ENSMUSG00000016181.9	Utp25	chr1	193123637	193123808	193128266	193128542	193129490	193129530	0.0546875	0.0405949	0.0441942	0.229983	0.896772	0
ENSMUSG00000016181.9	Utp25	chr1	193123637	193123808	193128266	193128546	193129490	193129530	0.0258241	0.0167552	0.0140718	0.124988	0.896772	0
ENSMUSG00000016481.15	Cr1l	chr1	195098746	195098841	195106817	195106922	195111079	195111155	0.0205589	0.0391614	0.0196419	0.480541	0.930278	0
ENSMUSG00000016481.15	Cr1l	chr1	195103795	195103907	195106817	195106922	195111079	195111155	0.0394484	0.0322642	0.0184533	0.143884	0.896772	0
ENSMUSG00000040624.18	Plekhg1	chr10	3740377	3740540	3740822	3741007	3802739	3802800	0.00788317	0.0183767	0.0288833	0.749109	0.990444	0
ENSMUSG00000040624.18	Plekhg1	chr10	3957890	3958205	3960088	3960285	3963400	3963526	0.0103768	0	0.00746403	0.188127	0.896772	0
ENSMUSG00000061759.15	Armt1	chr10	4434827	4434933	4439491	4439736	4450646	4450809	0.00563326	0.0393648	0.0241746	0.84576	0.999593	0
ENSMUSG00000061759.15	Armt1	chr10	4439491	4439736	4448308	4448423	4450646	4450809	0.01951	0.0404842	0.0340194	0.579747	0.946886	0
ENSMUSG00000019796.12	Lrp11	chr10	7598706	7598848	7602828	7602954	7604173	7604383	0.0146914	0.19245	0.10631	0.961893	0.999593	0
ENSMUSG00000019794.13	Katna1	chr10	7741407	7741565	7743555	7743736	7748775	7748897	0.0129058	0.0125617	0.0057089	0.187933	0.896772	0
ENSMUSG00000019794.13	Katna1	chr10	7760734	7760869	7761242	7761369	7762789	7763064	0.00922058	0.00576788	0.00582978	0.152681	0.896772	0
ENSMUSG00000015757.10	Ppil4	chr10	7801844	7801969	7802060	7802206	7804955	7805022	0.00829217	0.011734	0.00881477	0.408186	0.922474	0
ENSMUSG00000019817.18	Plagl1	chr10	13090840	13091024	13091774	13091812	13105854	13105893	0.0447222	0.0846931	0.0373257	0.47414	0.930278	0
ENSMUSG00000019817.18	Plagl1	chr10	13105854	13105893	13108822	13108908	13112518	13112548	0.0289544	0.117924	0.0233987	0.74546	0.988706	0
ENSMUSG00000015501.10	Hivep2	chr10	13966074	13966220	14004197	14004275	14066582	14066680	0.0161859	0.0463034	0.121099	0.911469	0.999593	0
ENSMUSG00000015501.10	Hivep2	chr10	13966074	13966220	14004200	14004275	14066582	14066680	0.0320041	0.0821568	0.106484	0.731864	0.984738	0
ENSMUSG00000015501.10	Hivep2	chr10	13966074	13966220	14004200	14018109	14066582	14066684	0.0117017	0.0967635	0.0996405	0.904094	0.999593	0
ENSMUSG00000015501.10	Hivep2	chr10	13966074	13966220	14004200	14018113	14066582	14066684	0.0425995	0.108253	0.0281436	0.573016	0.946564	0
ENSMUSG00000015501.10	Hivep2	chr10	13966074	13966220	14066582	14066684	14126451	14126496	0.0184127	0.023094	0.0448957	0.6307	0.957323	0
ENSMUSG00000015501.10	Hivep2	chr10	13966645	13966697	14004197	14004275	14066582	14066680	0.0204168	0.0940698	0.0322515	0.778871	0.999593	0
ENSMUSG00000015501.10	Hivep2	chr10	13966645	13966697	14004200	14004275	14066582	14066680	0.0421179	0.126022	0.0983889	0.683461	0.970431	0
ENSMUSG00000015501.10	Hivep2	chr10	13966645	13966697	14004200	14018109	14066582	14066684	0.000360777	0.172548	0.124863	0.972492	0.999593	0
ENSMUSG00000015501.10	Hivep2	chr10	13966645	13966697	14004200	14018113	14066582	14066684	0.00941851	0.0787296	0.0509627	0.89431	0.999593	0
ENSMUSG00000015501.10	Hivep2	chr10	13967023	13967080	14004200	14004275	14066582	14066680	0.211816	0.157233	0.12623	0.166974	0.896772	0
ENSMUSG00000015501.10	Hivep2	chr10	13967023	13967410	14004200	14004275	14066582	14066680	0.025463	0.0189013	0.0205772	0.236009	0.896772	0
ENSMUSG00000015501.10	Hivep2	chr10	14066582	14066684	14093857	14093912	14117518	14117600	0.0343137	0.0964329	0.0277297	0.617289	0.952895	0
ENSMUSG00000015501.10	Hivep2	chr10	14066582	14066684	14117518	14117600	14126451	14126496	0.070864	0.0468215	0.0615378	0.248535	0.896772	0
ENSMUSG00000015501.10	Hivep2	chr10	14127292	14132798	14133739	14133894	14139384	14139560	0.00226905	0.00416358	0.00660847	0.694172	0.97259	0
ENSMUSG00000015501.10	Hivep2	chr10	14133739	14133894	14139384	14139560	14142240	14142342	0.017248	0.0189295	0.0191907	0.376621	0.911934	0
ENSMUSG00000019854.17	Reps1	chr10	18092844	18093041	18093169	18093323	18093778	18093837	0.01245	0.0243266	0.00929808	0.471448	0.930278	0
ENSMUSG00000019854.17	Reps1	chr10	18096181	18096336	18104153	18104275	18114398	18114486	0.05625	0.0569402	0	0.185825	0.896772	0
ENSMUSG00000019854.17	Reps1	chr10	18104211	18104275	18107667	18107748	18114398	18114486	0.019271	0.1116	0.0999749	0.838895	0.999593	0
ENSMUSG00000019854.17	Reps1	chr10	18104211	18104275	18107670	18107748	18114398	18114486	0.0372352	0.10399	0.0288658	0.549215	0.943134	0
ENSMUSG00000039835.16	Nhsl1	chr10	18319240	18319276	18408410	18408514	18472918	18473071	0.0185207	0.015796	0.00175897	0.133049	0.896772	0
ENSMUSG00000039835.16	Nhsl1	chr10	18408414	18408514	18472918	18473071	18498032	18498078	0.00693013	0.0299394	0.02857	0.806279	0.999593	0
ENSMUSG00000039835.16	Nhsl1	chr10	18511549	18511742	18516028	18516160	18523790	18524289	0.0353586	0.0813485	0.0629022	0.62325	0.954493	0
ENSMUSG00000020009.13	Ifngr1	chr10	19592061	19592197	19597415	19597516	19601319	19601483	0.0556554	0.0609102	0.0334633	0.245177	0.896772	0
ENSMUSG00000020009.13	Ifngr1	chr10	19592061	19592197	19597415	19597530	19601319	19601483	0.00121158	0.00756094	0.00900699	0.882659	0.999593	0
ENSMUSG00000020009.13	Ifngr1	chr10	19597415	19597516	19599038	19599137	19601319	19601403	0.0388803	0.0801695	0.042855	0.524726	0.93571	0
ENSMUSG00000020009.13	Ifngr1	chr10	19597415	19597530	19599038	19599137	19601319	19601403	0.00944846	0.00582301	0.00551122	0.132199	0.896772	0
ENSMUSG00000020009.13	Ifngr1	chr10	19606233	19606420	19607256	19607381	19609136	19609256	0.00618415	0.0092224	0.0111741	0.553775	0.943411	0
ENSMUSG00000071369.11	Map3k5	chr10	20000565	20000705	20019557	20019581	20023607	20023801	0.0308219	0.0073392	0.0339968	0.328587	0.899685	0
ENSMUSG00000071369.11	Map3k5	chr10	20019557	20019581	20023607	20023801	20024884	20025053	0.0212463	0.0167176	0	0.11541	0.896772	0
ENSMUSG00000071369.11	Map3k5	chr10	20029032	20029203	20046371	20046484	20056474	20056634	0.00538782	0.0252179	0.0218212	0.811627	0.999593	0
ENSMUSG00000071369.11	Map3k5	chr10	20058936	20059090	20067828	20067936	20076481	20076531	0.102059	0.0338445	0.00538887	0.0128045	0.896772	0
ENSMUSG00000071369.11	Map3k5	chr10	20058936	20059090	20076481	20076531	20079241	20079337	0	0.185922	0	0.935156	0.999593	0
ENSMUSG00000071369.11	Map3k5	chr10	20111777	20111798	20118144	20118583	20124951	20125137	0.00175439	0.057735	0.0496215	0.976514	0.999593	0
ENSMUSG00000019996.17	Map7	chr10	20250369	20250480	20257183	20257297	20261858	20261983	0.00792162	0.00975926	0	0.254801	0.896772	0
ENSMUSG00000019996.17	Map7	chr10	20250369	20250480	20257183	20257329	20261858	20261983	0	0.111648	0	0.961409	0.999593	0
ENSMUSG00000037608.16	Bclaf1	chr10	20326044	20326099	20327163	20327391	20328101	20328207	0.00870949	0.00823935	0.032167	0.732123	0.984738	0
ENSMUSG00000037608.16	Bclaf1	chr10	20332085	20332261	20332395	20332518	20333391	20333572	0.00363047	0.0123676	0.00919804	0.724371	0.982069	0
ENSMUSG00000037608.16	Bclaf1	chr10	20332085	20332261	20332395	20332557	20333391	20333572	0.00430565	0.0320154	0.0501923	0.933881	0.999593	0
ENSMUSG00000037608.16	Bclaf1	chr10	20332085	20332261	20332395	20332569	20333391	20333572	0.0122106	0.00568424	0.0111221	0.256471	0.896772	0
ENSMUSG00000037608.16	Bclaf1	chr10	20332085	20332261	20332505	20332518	20333391	20333572	0.009317	0.00539244	0.00919804	0.289328	0.896772	0
ENSMUSG00000037608.16	Bclaf1	chr10	20332085	20332261	20332505	20332557	20333391	20333572	0.00673274	0.0111711	0.0100038	0.514257	0.932146	0
ENSMUSG00000037608.16	Bclaf1	chr10	20333391	20333572	20334498	20334645	20339708	20339921	0.0259734	0.0498863	0.0187189	0.445197	0.930278	0
ENSMUSG00000019986.17	Ahi1	chr10	21058152	21058250	21070287	21070329	21072542	21072601	0.0620953	0.0989836	0.0250903	0.367222	0.910985	0
ENSMUSG00000019977.16	Hbs1l	chr10	21299177	21299243	21304529	21304643	21307584	21307778	0.0178348	0.00294473	0.0295709	0.482493	0.930892	0
ENSMUSG00000019977.16	Hbs1l	chr10	21299177	21299243	21307584	21307779	21336966	21336974	0	0	0.231125	0.926233	0.999593	0
ENSMUSG00000019977.16	Hbs1l	chr10	21307584	21307779	21309093	21309314	21336966	21336974	0.0137077	0.0331532	0.0244609	0.61092	0.951398	0
ENSMUSG00000019977.16	Hbs1l	chr10	21307584	21307779	21309098	21309314	21336966	21336974	0.0321704	0.0273508	0.0401156	0.392422	0.919447	0
ENSMUSG00000019977.16	Hbs1l	chr10	21341713	21341979	21342398	21342564	21345076	21345194	0.0672552	0.0311452	0.0100208	0.0286497	0.896772	0
ENSMUSG00000019977.16	Hbs1l	chr10	21347261	21347408	21349311	21349386	21351926	21352044	0.0173392	0	0.0134519	0.210201	0.896772	0
ENSMUSG00000037455.16	Slc18b1	chr10	23805975	23806040	23810788	23810945	23816292	23816429	0.0416667	0.117097	0.0336718	0.579378	0.946848	0
ENSMUSG00000037440.8	Vnn1	chr10	23900584	23900943	23903385	23903556	23904477	23905343	0.0207296	0.0438494	0.0473125	0.648869	0.962263	0
ENSMUSG00000019998.6	Stx7	chr10	24155234	24155384	24177165	24177235	24179116	24179210	0.00267359	0.003591	0.00467852	0.535981	0.940301	0
ENSMUSG00000019998.6	Stx7	chr10	24182768	24182841	24184986	24185069	24187627	24188961	0.0114115	0.0206507	0.0231518	0.604326	0.950077	0
ENSMUSG00000019998.6	Stx7	chr10	24182768	24182841	24184990	24185069	24187627	24188961	0.196065	0.14554	0.254207	0.387454	0.916881	0
ENSMUSG00000020000.7	Moxd1	chr10	24223847	24223867	24241204	24241285	24244239	24244386	0.0117394	0.0181761	0.00708879	0.369083	0.910985	0
ENSMUSG00000020000.7	Moxd1	chr10	24279842	24279945	24281417	24281584	24282562	24282754	0.0227273	0.0340207	0.00714249	0.335562	0.901747	0
ENSMUSG00000019984.16	Med23	chr10	24870663	24870751	24873472	24873597	24874569	24874681	0.0576633	0.104054	0.0408579	0.426151	0.930278	0
ENSMUSG00000019984.16	Med23	chr10	24879672	24879785	24882553	24882649	24888399	24888600	0.0222409	0.0803032	0.0640701	0.754783	0.99225	0
ENSMUSG00000019984.16	Med23	chr10	24879672	24879785	24882553	24882762	24888399	24888600	0.037098	0.0275381	0.0299797	0.23801	0.896772	0
ENSMUSG00000019984.16	Med23	chr10	24882553	24882649	24883203	24883221	24888399	24888600	0.0182861	0.071486	0.0189594	0.73757	0.985476	0
ENSMUSG00000019978.16	Epb41l2	chr10	25359855	25359981	25405651	25405757	25441572	25441634	0.00461803	0.00676582	0.000742812	0.324031	0.898112	0
ENSMUSG00000019978.16	Epb41l2	chr10	25471418	25471637	25473075	25473163	25479008	25479161	0.00511634	0.00622429	0.0079438	0.490845	0.930962	0
ENSMUSG00000019978.16	Epb41l2	chr10	25488951	25489093	25493566	25493629	25495444	25495591	0.0938601	0.124191	0.027936	0.287451	0.896772	0
ENSMUSG00000019978.16	Epb41l2	chr10	25488951	25489093	25495444	25495591	25501577	25501631	0.15113	0.0419268	0.0879384	0.111389	0.896772	0
ENSMUSG00000019978.16	Epb41l2	chr10	25488950	25489093	25495444	25495591	25501823	25501854	0.00195657	0.00377535	0.00103385	0.445261	0.930278	0
ENSMUSG00000019978.16	Epb41l2	chr10	25488950	25489093	25501577	25501631	25501823	25501854	0.00208384	0.005511	0.00328827	0.618831	0.953739	0
ENSMUSG00000019978.16	Epb41l2	chr10	25488950	25489093	25501823	25502138	25506174	25506273	0.0142509	0.0729829	0.0123845	0.740666	0.986958	0
ENSMUSG00000019978.16	Epb41l2	chr10	25488950	25489093	25501823	25502387	25506174	25506273	0	0.0353553	0	0.985478	0.999593	0
ENSMUSG00000019978.16	Epb41l2	chr10	25488950	25489093	25501823	25502387	25507776	25507857	0.125847	0.0934174	0.123568	0.286562	0.896772	0
ENSMUSG00000019978.16	Epb41l2	chr10	25488950	25489093	25506174	25506273	25507776	25507857	0.0662879	0.049206	0.0535687	0.240282	0.896772	0
ENSMUSG00000019978.16	Epb41l2	chr10	25495480	25495591	25501577	25501631	25501823	25501854	0.0563922	0.062675	0.0116927	0.206934	0.896772	0
ENSMUSG00000019978.16	Epb41l2	chr10	25501823	25502138	25506174	25506273	25507776	25507857	0.0954545	0.0956708	0	0.182488	0.896772	0
ENSMUSG00000019978.16	Epb41l2	chr10	25502280	25502387	25504136	25504259	25506174	25506273	0.0162498	0.00645281	0.00272666	0.015458	0.896772	0
ENSMUSG00000019978.16	Epb41l2	chr10	25502280	25502387	25504136	25504259	25507776	25507857	0.304072	0.125422	0.126757	0.0630361	0.896772	0
ENSMUSG00000019978.16	Epb41l2	chr10	25502280	25502387	25505992	25506273	25507776	25507857	2.77556e-17	0	0.0289245	0.98822	0.999593	0
ENSMUSG00000019978.16	Epb41l2	chr10	25502280	25502387	25506010	25506273	25507776	25507857	0.0777778	0.057735	0.031427	0.104249	0.896772	0
ENSMUSG00000019978.16	Epb41l2	chr10	25502280	25502387	25506174	25506273	25507776	25507857	0.125449	0.0550127	0.0763939	0.144065	0.896772	0
ENSMUSG00000019978.16	Epb41l2	chr10	25504136	25504259	25506174	25506273	25507776	25507857	0.0270896	0.0157751	0.00168702	0.0581678	0.896772	0
ENSMUSG00000019978.16	Epb41l2	chr10	25507776	25507857	25512972	25513081	25522296	25522423	0.00525668	0.00825549	0.00238686	0.361273	0.908825	0
ENSMUSG00000039031.16	Arhgap18	chr10	26849874	26850110	26854873	26854937	26860556	26860732	0.00244458	0.0101855	0.0169251	0.869195	0.999593	0
ENSMUSG00000039031.16	Arhgap18	chr10	26869920	26870086	26872672	26872764	26877156	26877234	0.0257913	0.021912	0.0442263	0.506032	0.930962	0
ENSMUSG00000039031.16	Arhgap18	chr10	26878890	26879050	26879709	26879785	26880687	26880770	0.00558558	0.0165541	0.0103039	0.663895	0.96529	0
ENSMUSG00000039031.16	Arhgap18	chr10	26878890	26879050	26880687	26880770	26887780	26887987	0.00834567	0.0224086	0.0148462	0.63546	0.959244	0
ENSMUSG00000039031.16	Arhgap18	chr10	26889731	26889872	26912606	26912731	26916392	26916454	0.0704995	0.0506947	0.102364	0.442205	0.930278	0
ENSMUSG00000019889.10	Ptprk	chr10	28075009	28075177	28206133	28206256	28263500	28263772	1.51971e-05	0.00435159	0.00227497	0.99527	0.999593	0
ENSMUSG00000019889.10	Ptprk	chr10	28263500	28263772	28334475	28334557	28336421	28336537	0.00453289	0.0145959	0.00550706	0.648347	0.962263	0
ENSMUSG00000019889.10	Ptprk	chr10	28472947	28473057	28474577	28474638	28475084	28475286	0.00301418	0.003488	0	0.231134	0.896772	0
ENSMUSG00000019889.10	Ptprk	chr10	28492913	28493187	28496908	28496945	28551620	28551756	0.0280379	0.034858	0	0.259241	0.896772	0
ENSMUSG00000019889.10	Ptprk	chr10	28551620	28551756	28554769	28554799	28560004	28560165	0.00689426	0.00393894	0.00641469	0.266575	0.896772	0
ENSMUSG00000019889.10	Ptprk	chr10	28560150	28560165	28562106	28562142	28566494	28566679	0.0170046	0.0152467	0.00657123	0.156517	0.896772	0
ENSMUSG00000019889.10	Ptprk	chr10	28562106	28562142	28564094	28564106	28566494	28566679	0.125718	0.111164	0.0325107	0.14112	0.896772	0
ENSMUSG00000019889.10	Ptprk	chr10	28569896	28569973	28570173	28570191	28573367	28573404	0.0450877	0.0180754	0	0.0220835	0.896772	0
ENSMUSG00000019889.10	Ptprk	chr10	28585559	28585695	28585922	28586072	28586907	28587081	0.0261847	0.0287885	0.0238961	0.322819	0.897948	0
ENSMUSG00000019889.10	Ptprk	chr10	28585559	28585695	28585922	28586090	28586907	28587081	0.0434641	0.0322637	0.0351243	0.229078	0.896772	0
ENSMUSG00000038916.7	Soga3	chr10	29147334	29147753	29148184	29148409	29150243	29150402	0.061631	0.0557349	0	0.152653	0.896772	0
ENSMUSG00000004360.9	9330159F19Rik	chr10	29222220	29222300	29223333	29223405	29224234	29224537	0	0.0924678	0	0.955756	0.999593	0
ENSMUSG00000000295.13	Hddc2	chr10	31313471	31313483	31313563	31313698	31314514	31314636	0.0251261	0.00448718	0.00806046	0.0294777	0.896772	0
ENSMUSG00000000295.13	Hddc2	chr10	31320267	31320336	31325205	31325275	31326021	31326160	0.0143051	0.0405949	0.0129152	0.609417	0.951011	0
ENSMUSG00000019779.15	Frk	chr10	34483744	34484369	34542408	34542518	34547292	34547414	0.00323722	0.00543905	0.00210059	0.402991	0.922474	0
ENSMUSG00000019779.15	Frk	chr10	34483744	34484369	34547292	34547414	34583897	34584061	0.007487	0.0249698	0.00492585	0.64016	0.960216	0
ENSMUSG00000019777.16	Hdac2	chr10	36985126	36985239	36986306	36986424	36988079	36988154	0.015986	0.0321343	0.0157896	0.501239	0.930962	0
ENSMUSG00000019777.16	Hdac2	chr10	36989149	36989288	36991756	36991898	36993607	36993700	0.0152002	0.011891	0.0152124	0.308201	0.896772	0
ENSMUSG00000019777.16	Hdac2	chr10	36997966	36998097	36998229	36998314	36998413	36998569	0.00498834	0.00364309	0.00375775	0.211324	0.896772	0
ENSMUSG00000019846.11	Lama4	chr10	39010997	39011122	39017320	39017401	39026534	39026749	0.0208333	0.0154647	0.0673435	0.697056	0.973015	0
ENSMUSG00000019846.11	Lama4	chr10	39026534	39026749	39028621	39028696	39030432	39030584	0.0760025	0	0.0373569	0.104666	0.896772	0
ENSMUSG00000019843.14	Fyn	chr10	39395004	39395044	39455065	39455135	39511738	39511859	0.0235098	0.0683759	0.0238453	0.603488	0.950077	0
ENSMUSG00000019843.14	Fyn	chr10	39526780	39526930	39529436	39529601	39532015	39532195	0.0245299	0.0553995	0.042409	0.598063	0.949659	0
ENSMUSG00000019842.6	Traf3ip2	chr10	39612933	39613346	39625849	39626659	39634534	39634724	0.00977122	0.0302837	0.0231425	0.698066	0.973174	0
ENSMUSG00000019842.6	Traf3ip2	chr10	39612933	39613346	39625849	39626923	39634534	39634724	0.252778	0.108333	0.149278	0.0987718	0.896772	0
ENSMUSG00000019842.6	Traf3ip2	chr10	39625849	39626659	39633691	39633761	39634534	39634724	0.004166	0.00717366	0.00211419	0.402716	0.922474	0
ENSMUSG00000019842.6	Traf3ip2	chr10	39639219	39639398	39641305	39641394	39646848	39646965	0	0.0824958	0	0.970548	0.999593	0
ENSMUSG00000019842.6	Traf3ip2	chr10	39641305	39641394	39645707	39645776	39646848	39646965	0.0294434	0.0245825	0.0103039	0.133134	0.896772	0
ENSMUSG00000019841.15	Rev3l	chr10	39732463	39732613	39742690	39742818	39783142	39783332	0.0718118	0.0932031	0.151572	0.566409	0.945622	0
ENSMUSG00000019841.15	Rev3l	chr10	39794863	39795024	39799880	39799977	39804951	39805046	0.0276056	0.0283514	0.0239697	0.295856	0.896772	0
ENSMUSG00000019841.15	Rev3l	chr10	39813970	39814090	39817141	39817379	39820447	39820590	0.00161638	0.0845115	0.097532	0.980491	0.999593	0
ENSMUSG00000019841.15	Rev3l	chr10	39851866	39852073	39854698	39854808	39859106	39859221	0.027451	0.0485071	0.0110919	0.405591	0.922474	0
ENSMUSG00000038481.13	Cdk19	chr10	40349638	40349721	40394324	40394400	40434303	40434414	0.00485818	0.0298051	0.0331742	0.874855	0.999593	0
ENSMUSG00000038481.13	Cdk19	chr10	40436071	40436212	40454014	40454072	40466637	40466769	0.117085	0.0614296	0.0888559	0.203147	0.896772	0
ENSMUSG00000038481.13	Cdk19	chr10	40436071	40436212	40466637	40466769	40475568	40475641	0	0.0707107	0	0.971863	0.999593	0
ENSMUSG00000038481.13	Cdk19	chr10	40444736	40444936	40454014	40454072	40466637	40466769	0	0.00642824	0	0.997738	0.999593	0
ENSMUSG00000038481.13	Cdk19	chr10	40454014	40454072	40466637	40466769	40469578	40469722	0.0340107	0.00721688	0.0293679	0.240607	0.896772	0
ENSMUSG00000038481.13	Cdk19	chr10	40466637	40466769	40469578	40469722	40475568	40475641	0.134491	0.211306	0.108685	0.387479	0.916881	0
ENSMUSG00000038481.13	Cdk19	chr10	40469578	40469722	40469885	40469955	40475568	40475641	0.0142052	0.0206403	0.0228601	0.518095	0.934143	0
ENSMUSG00000038481.13	Cdk19	chr10	40469885	40469955	40475568	40475641	40476156	40476254	0.00585031	0.0131885	0.00391092	0.511076	0.931723	0
ENSMUSG00000038481.13	Cdk19	chr10	40476156	40476254	40476888	40476967	40477701	40477968	0.0148954	0.0105815	0	0.0928859	0.896772	0
ENSMUSG00000063428.8	Ddo	chr10	40631605	40631780	40632937	40633046	40637344	40637521	0.0972945	0.0262577	0.0554594	0.114335	0.896772	0
ENSMUSG00000019823.17	Mical1	chr10	41479398	41479499	41479618	41479774	41480284	41480385	0.0146075	0.0819213	0.0875466	0.860669	0.999593	0
ENSMUSG00000019823.17	Mical1	chr10	41485765	41485879	41486027	41486121	41486371	41486471	0.0327986	0.0230314	0	0.0909262	0.896772	0
ENSMUSG00000078451.5	Ppil6	chr10	41501783	41501931	41502995	41503052	41507423	41507559	0.0875	0.0649519	0.0707107	0.227863	0.896772	0
ENSMUSG00000019818.15	Cd164	chr10	41519500	41519700	41521917	41522007	41524106	41524145	0.0367593	0.161336	0.0839461	0.77953	0.999593	0
ENSMUSG00000019818.15	Cd164	chr10	41519500	41519700	41524106	41524145	41528671	41529046	0	0.118923	0	0.950563	0.999593	0
ENSMUSG00000019818.15	Cd164	chr10	41521919	41522007	41523172	41523244	41524106	41524145	0.00193051	0.00678046	0.00712476	0.776821	0.999593	0
ENSMUSG00000019818.15	Cd164	chr10	41524106	41524145	41526826	41526883	41528671	41529046	0.00229975	0.00992341	0.0057768	0.756008	0.992747	0
ENSMUSG00000019804.12	Snx3	chr10	42502459	42502492	42525953	42526049	42533148	42533273	0.0107487	0.00355901	0.00844924	0.207231	0.896772	0
ENSMUSG00000019802.13	Sec63	chr10	42789299	42789414	42791178	42791291	42794774	42794836	0.000770612	0.00356389	0.00182009	0.763926	0.995254	0
ENSMUSG00000019802.13	Sec63	chr10	42796205	42796264	42797682	42797733	42798746	42798855	0.00210927	0.0114282	0.00521236	0.790552	0.999593	0
ENSMUSG00000019802.13	Sec63	chr10	42796205	42796264	42797682	42797733	42801632	42801727	0.0225009	0.188505	0.0618109	0.917913	0.999593	0
ENSMUSG00000019802.13	Sec63	chr10	42797682	42797733	42798746	42798855	42801632	42801727	0.0183262	0.0171297	0.0192198	0.338935	0.901782	0
ENSMUSG00000019802.13	Sec63	chr10	42806523	42806671	42810842	42810925	42812435	42812495	0.00281494	0.0094551	0.0139221	0.816508	0.999593	0
ENSMUSG00000019802.13	Sec63	chr10	42806523	42806671	42810842	42810925	42812439	42812495	0.07	0.259808	0.0565685	0.633584	0.958361	0
ENSMUSG00000038214.15	Bend3	chr10	43479139	43479372	43492638	43492715	43493641	43493689	0.0203449	0.0255045	0.0254594	0.426588	0.930278	0
ENSMUSG00000047139.9	Cd24a	chr10	43579168	43579322	43582603	43582640	43582891	43583127	0.0624036	0.116545	0.0725632	0.473556	0.930278	0
ENSMUSG00000019864.14	Rtn4ip1	chr10	43910792	43910917	43921386	43921435	43928322	43928459	0.100819	0.088592	0.0778595	0.237955	0.896772	0
ENSMUSG00000019864.14	Rtn4ip1	chr10	43932362	43932546	43935998	43936091	43946420	43947862	0.0198413	0.061859	0.041574	0.696421	0.973015	0
ENSMUSG00000038160.7	Atg5	chr10	44268414	44268584	44274640	44274694	44286031	44286197	0.0182593	0.00959263	0.00713241	0.0591981	0.896772	0
ENSMUSG00000038160.7	Atg5	chr10	44289862	44289990	44294595	44294674	44303566	44303729	0.0349773	0.0341916	0.0496601	0.446019	0.930278	0
ENSMUSG00000038160.7	Atg5	chr10	44303566	44303729	44319459	44319554	44346956	44347074	0.0359925	0.0246914	0.00462934	0.0827567	0.896772	0
ENSMUSG00000019849.11	Prep	chr10	45107771	45107877	45115062	45115254	45120642	45120840	0.00285592	0.0188266	0.0194108	0.878276	0.999593	0
ENSMUSG00000038822.15	Hace1	chr10	45588379	45588434	45589480	45589570	45590267	45590372	0.0296355	0.0709422	0.0626893	0.643547	0.961179	0
ENSMUSG00000038822.15	Hace1	chr10	45618497	45618629	45638320	45638403	45648590	45648647	0.0318152	0.137214	0.0911509	0.788745	0.999593	0
ENSMUSG00000038822.15	Hace1	chr10	45638320	45638403	45639767	45639803	45648590	45648647	0.0580207	0.0169809	0.0287037	0.0797092	0.896772	0
ENSMUSG00000038822.15	Hace1	chr10	45677066	45677263	45686601	45686733	45700576	45700675	0.0226881	0.040062	0.00995216	0.401759	0.922474	0
ENSMUSG00000038774.9	Ascc3	chr10	50592668	50592897	50596036	50596127	50604750	50604882	0.00486466	0.00141971	0.00222286	0.0686203	0.896772	0
ENSMUSG00000038774.9	Ascc3	chr10	50592668	50592897	50604750	50604882	50617711	50618271	0.0634804	0.144941	0.0426067	0.55488	0.943411	0
ENSMUSG00000038774.9	Ascc3	chr10	50604771	50604882	50607919	50608070	50617711	50618271	0.00346572	0.0190204	0.0308023	0.891728	0.999593	0
ENSMUSG00000038774.9	Ascc3	chr10	50617711	50618271	50635032	50635101	50637907	50638028	0.0482822	0.0275595	0.0399774	0.225597	0.896772	0
ENSMUSG00000038774.9	Ascc3	chr10	50699939	50700131	50700431	50700656	50707662	50707782	0.00145685	0.0097856	0.00592962	0.842946	0.999593	0
ENSMUSG00000038774.9	Ascc3	chr10	50700431	50700656	50704536	50704611	50707662	50707782	0.00428485	0.0126942	0.00430506	0.621055	0.954271	0
ENSMUSG00000038774.9	Ascc3	chr10	50707662	50707782	50710879	50711044	50713175	50713262	0.00617338	0.00173205	0.00515774	0.227618	0.896772	0
ENSMUSG00000038774.9	Ascc3	chr10	50735209	50735352	50748463	50748485	50748805	50748943	0.00967255	0.0237182	0.00116029	0.537285	0.940376	0
ENSMUSG00000038774.9	Ascc3	chr10	50748805	50748943	50749034	50749155	50750452	50750585	0.0179596	0.0234502	0.0102111	0.300816	0.896772	0
ENSMUSG00000019900.19	Rfx6	chr10	51711980	51712094	51713466	51713516	51715889	51716049	0.0945583	0.101394	0.118512	0.415516	0.925717	0
ENSMUSG00000019900.19	Rfx6	chr10	51719946	51720056	51721500	51721618	51723000	51723123	0.0803953	0.0198927	0.0787416	0.28581	0.896772	0
ENSMUSG00000019900.19	Rfx6	chr10	51723732	51723939	51724317	51724395	51725366	51725879	0.103835	0.0715205	0	0.0766939	0.896772	0
ENSMUSG00000019891.15	Dcbld1	chr10	52233636	52233835	52261726	52261939	52284102	52284237	0.0122144	0.066237	0.00612321	0.751651	0.991349	0
ENSMUSG00000019891.15	Dcbld1	chr10	52261726	52261939	52284102	52284237	52286347	52286399	0.0179331	0.043362	0.0505123	0.703209	0.975015	0
ENSMUSG00000019891.15	Dcbld1	chr10	52290850	52290923	52304586	52304720	52311399	52311440	0.00516474	0.0507918	0.0385399	0.908451	0.999593	0
ENSMUSG00000019891.15	Dcbld1	chr10	52312813	52312901	52314354	52314404	52317031	52317151	0.000547345	0.0119452	0.00897913	0.954582	0.999593	0
ENSMUSG00000019891.15	Dcbld1	chr10	52314354	52314404	52317031	52317151	52319475	52321376	0.0130417	0.00392772	0.0267843	0.561045	0.944378	0
ENSMUSG00000019878.8	Hsf2	chr10	57486424	57486601	57490857	57490929	57495897	57496006	0.0453255	0.0273543	0.00453274	0.0577705	0.896772	0
ENSMUSG00000019878.8	Hsf2	chr10	57506196	57506302	57509060	57509114	57511443	57511528	0.207241	0.0949494	0.0540804	0.0326304	0.896772	0
ENSMUSG00000038039.13	Gcc2	chr10	58256819	58256904	58257861	58257974	58258240	58258308	0.00217174	0.00664298	0.00976824	0.802753	0.999593	0
ENSMUSG00000038039.13	Gcc2	chr10	58256819	58256904	58257861	58258001	58258240	58258308	0.00301542	0.0218631	0.0184323	0.87205	0.999593	0
ENSMUSG00000038039.13	Gcc2	chr10	58269261	58271706	58272332	58272405	58274735	58274836	0.0561417	0.0418554	0.0616102	0.337055	0.901747	0
ENSMUSG00000038039.13	Gcc2	chr10	58274956	58275034	58276577	58276697	58278786	58278951	0.00498	0.0124877	0.00977861	0.641313	0.960757	0
ENSMUSG00000019920.18	Lims1	chr10	58323465	58323687	58351046	58351100	58399020	58399180	0.00679106	0.00524476	0.00852393	0.388678	0.917405	0
ENSMUSG00000019920.18	Lims1	chr10	58323465	58323687	58351046	58352197	58399020	58399180	0.00118084	0.00555144	0.00620269	0.83875	0.999593	0
ENSMUSG00000019920.18	Lims1	chr10	58399020	58399180	58408069	58408136	58409559	58409680	0.00452941	0.0156192	0.0140021	0.749941	0.990969	0
ENSMUSG00000019920.18	Lims1	chr10	58410052	58410202	58412402	58412553	58413972	58414065	0.0159916	0.0335392	0.0182479	0.521221	0.934498	0
ENSMUSG00000019920.18	Lims1	chr10	58410052	58410202	58412406	58412553	58413972	58414065	0.291667	0.216506	0.235702	0.217802	0.896772	0
ENSMUSG00000003226.7	Ranbp2	chr10	58451986	58452051	58453311	58453423	58454572	58454725	0.0141351	0.00703913	0.0074676	0.0989941	0.896772	0
ENSMUSG00000003226.7	Ranbp2	chr10	58457591	58457784	58460517	58460605	58461835	58462045	0.042153	0.0287151	0.0159748	0.0933195	0.896772	0
ENSMUSG00000003226.7	Ranbp2	chr10	58463818	58464000	58464082	58464258	58464404	58464528	0.00356125	0.00370096	0	0.194213	0.896772	0
ENSMUSG00000003226.7	Ranbp2	chr10	58485679	58485881	58488572	58488674	58490609	58490755	0.0064516	0.00486175	0.00594693	0.276161	0.896772	0
ENSMUSG00000003226.7	Ranbp2	chr10	58488572	58488674	58488901	58488997	58490609	58490755	0.00143045	0.00130433	0.00107137	0.240708	0.896772	0
ENSMUSG00000038010.9	Ccdc138	chr10	58507520	58507641	58509504	58509632	58513078	58513257	0.166026	0.123242	0.134169	0.250579	0.896772	0
ENSMUSG00000019916.14	P4ha1	chr10	59343656	59343794	59348180	59348420	59350403	59350563	0.00982347	0.0199784	0.0102928	0.502498	0.930962	0
ENSMUSG00000019916.14	P4ha1	chr10	59352082	59352259	59354339	59354410	59355349	59355420	0.0280825	0.0282576	0	0.18357	0.896772	0
ENSMUSG00000019916.14	P4ha1	chr10	59352082	59352259	59354339	59354410	59361860	59361960	0.0095658	0.0545533	0.0993884	0.890589	0.999593	0
ENSMUSG00000019916.14	P4ha1	chr10	59352082	59352259	59355349	59355420	59361860	59361960	0.0637831	0.06438	0.0618927	0.319588	0.897575	0
ENSMUSG00000019916.14	P4ha1	chr10	59354339	59354410	59355349	59355420	59361860	59361960	0.0505952	0.05077	0	0.18269	0.896772	0
ENSMUSG00000020109.13	Dnajb12	chr10	59879790	59879810	59890027	59890208	59890839	59890985	0.00289577	0.00776704	0.010437	0.756391	0.992818	0
ENSMUSG00000044475.14	Ascc1	chr10	60007726	60007826	60012461	60012559	60013595	60013774	0.0123444	0.0310979	0.0223526	0.632304	0.957836	0
ENSMUSG00000004207.14	Psap	chr10	60293348	60293474	60294532	60294637	60294964	60295108	0.0643939	0.131494	0.063862	0.488495	0.930962	0
ENSMUSG00000004207.14	Psap	chr10	60293348	60293474	60294532	60294730	60294964	60295108	0.000694132	0.00337573	0.0023485	0.797684	0.999593	0
ENSMUSG00000004207.14	Psap	chr10	60295945	60296002	60297185	60297442	60299097	60299229	0.000628769	0.000692624	0	0.213879	0.896772	0
ENSMUSG00000004207.14	Psap	chr10	60295945	60296002	60297536	60297545	60299097	60299229	0.00633957	0.00792168	0.00112108	0.261113	0.896772	0
ENSMUSG00000020098.7	Pcbd1	chr10	61089358	61089416	61092063	61092195	61092603	61092684	0.00504903	0.0115026	0.00717002	0.570108	0.946564	0
ENSMUSG00000037151.8	Lrrc20	chr10	61475800	61475889	61482335	61482482	61527059	61527209	0.0726375	0.0355836	0.0302964	0.0624983	0.896772	0
ENSMUSG00000037151.8	Lrrc20	chr10	61482335	61482482	61527059	61527209	61548047	61548215	0.0687793	0	0.0618659	0.259233	0.896772	0
ENSMUSG00000020088.10	Sar1a	chr10	61680366	61680413	61682098	61682148	61684879	61684926	0.00782815	0.00823579	0.0193046	0.636823	0.959277	0
ENSMUSG00000020088.10	Sar1a	chr10	61680366	61680413	61684060	61684187	61684879	61684926	0.028153	0.0137439	0.0345421	0.369948	0.910985	0
ENSMUSG00000020088.10	Sar1a	chr10	61680364	61680413	61684233	61684331	61684879	61684953	0.00742857	0	0.0058461	0.213869	0.896772	0
ENSMUSG00000020088.10	Sar1a	chr10	61686374	61686478	61689611	61689687	61689773	61689818	0.000943464	0.00169146	0.000271196	0.40772	0.922474	0
ENSMUSG00000020087.5	Tysnd1	chr10	61696709	61696742	61698297	61698428	61699442	61699628	0.00625	0.0511585	0.0471405	0.893668	0.999593	0
ENSMUSG00000020085.15	Aifm2	chr10	61735457	61735658	61736582	61736758	61738398	61738653	0.0311111	0	0.0251416	0.224446	0.896772	0
ENSMUSG00000020085.15	Aifm2	chr10	61735457	61735658	61736582	61736758	61739027	61739260	1.11022e-16	0.093934	1.11022e-16	0.968626	0.999593	0
ENSMUSG00000020070.18	Rufy2	chr10	62994704	62994770	62995309	62995379	62997880	62997982	0.00704619	0.104012	0.0590894	0.908489	0.999593	0
ENSMUSG00000112129.1	Pbld1	chr10	63060728	63060915	63061296	63061466	63061557	63061701	3.46945e-18	0.0207973	3.46945e-18	0.987138	0.999593	0
ENSMUSG00000020064.9	Herc4	chr10	63245827	63246125	63249953	63250086	63264025	63264185	0.0203477	0.033196	0.0336034	0.539865	0.940877	0
ENSMUSG00000020064.9	Herc4	chr10	63273450	63273672	63274996	63275088	63278334	63278465	0.00590327	0.0151853	0.0432843	0.876213	0.999593	0
ENSMUSG00000020064.9	Herc4	chr10	63283212	63283341	63285651	63285728	63287518	63287578	0.184211	0.136741	0.148865	0.219987	0.896772	0
ENSMUSG00000020064.9	Herc4	chr10	63285651	63285728	63286016	63286141	63287518	63287578	0.0452062	0	0.0524974	0.349244	0.903945	0
ENSMUSG00000020064.9	Herc4	chr10	63287518	63287578	63287897	63288009	63289051	63289217	0.0121958	0.0352855	0.0277297	0.68366	0.970666	0
ENSMUSG00000020064.9	Herc4	chr10	63289051	63289241	63290503	63290676	63299119	63299239	0.013725	0.0341252	0.0265487	0.633384	0.95821	0
ENSMUSG00000020064.9	Herc4	chr10	63290503	63290676	63291179	63291283	63299119	63299239	0.0253089	0.0723096	0.0107261	0.613891	0.951718	0
ENSMUSG00000020064.9	Herc4	chr10	63299119	63299239	63303844	63303868	63306347	63306446	0.00976238	0.0238697	0.0491943	0.795942	0.999593	0
ENSMUSG00000020064.9	Herc4	chr10	63314486	63314569	63315659	63315843	63316699	63316802	0.0543688	0.0408238	0.0601174	0.342839	0.902005	0
ENSMUSG00000037876.17	Jmjd1c	chr10	67096698	67096718	67157906	67158071	67215269	67215375	0.0417995	0.0661193	0.0693047	0.537411	0.940376	0
ENSMUSG00000037876.17	Jmjd1c	chr10	67157906	67158071	67189735	67189849	67215269	67215375	0.0686286	0.119791	0.0277352	0.394221	0.92081	0
ENSMUSG00000037876.17	Jmjd1c	chr10	67185748	67186306	67189735	67189849	67215269	67215375	0.0469907	0.0348816	0.120577	0.62281	0.954271	0
ENSMUSG00000037876.17	Jmjd1c	chr10	67185752	67186311	67189735	67189849	67215269	67215375	0.0440384	0.0592812	0.0648814	0.487708	0.930962	0
ENSMUSG00000037876.17	Jmjd1c	chr10	67185752	67186311	67189735	67199139	67215269	67215375	0.121528	0.15625	0.0491046	0.270758	0.896772	0
ENSMUSG00000037876.17	Jmjd1c	chr10	67215269	67215375	67216982	67217107	67218037	67218181	0.0590581	0.0721808	0.0623629	0.374383	0.910991	0
ENSMUSG00000037876.17	Jmjd1c	chr10	67215269	67215375	67216982	67217107	67218116	67218181	0.0185534	0.0506747	0.0446912	0.685347	0.97121	0
ENSMUSG00000037876.17	Jmjd1c	chr10	67215269	67215375	67216982	67218181	67218276	67218356	0.115648	0.0360013	0.0556603	0.0822549	0.896772	0
ENSMUSG00000037876.17	Jmjd1c	chr10	67215269	67215375	67216982	67218185	67218276	67218356	0.0838882	0.102644	0.0663687	0.328494	0.899685	0
ENSMUSG00000037876.17	Jmjd1c	chr10	67215269	67215375	67218037	67218181	67218276	67218356	0.168622	0.0904196	0.115555	0.168741	0.896772	0
ENSMUSG00000037876.17	Jmjd1c	chr10	67215269	67215375	67218116	67218181	67218276	67218356	0.0509176	0.0688641	0.00812001	0.295453	0.896772	0
ENSMUSG00000037876.17	Jmjd1c	chr10	67240662	67240941	67243771	67243940	67244782	67244873	0.0121017	0.0186917	0.016107	0.477034	0.930278	0
ENSMUSG00000037876.17	Jmjd1c	chr10	67249629	67249806	67252371	67253035	67254451	67254583	0.0119354	0.00463889	0.00452556	0.0411408	0.896772	0
ENSMUSG00000037876.17	Jmjd1c	chr10	67249629	67249806	67252371	67253452	67254451	67254583	0.00779544	0.00463889	0.00559706	0.182052	0.896772	0
ENSMUSG00000037876.17	Jmjd1c	chr10	67249629	67249806	67253229	67253452	67254451	67254583	0.00211343	0.0070723	0.00617309	0.739649	0.986336	0
ENSMUSG00000019944.14	Rhobtb1	chr10	69249624	69249728	69261186	69261245	69266186	69266372	0.0265152	0.0376889	0	0.307552	0.896772	0
ENSMUSG00000069601.14	Ank3	chr10	69398995	69399129	69484228	69484267	69808415	69808517	0.0204425	0.0367454	0.0181309	0.447301	0.930278	0
ENSMUSG00000069601.14	Ank3	chr10	69904197	69904270	69904447	69904510	69920437	69920491	0.12594	0.22058	0.171331	0.513886	0.931993	0
ENSMUSG00000069601.14	Ank3	chr10	69904197	69904270	69904447	69904510	69927694	69927818	0.00745239	0.0606769	0.0772741	0.9042	0.999593	0
ENSMUSG00000069601.14	Ank3	chr10	69904197	69904270	69920437	69920491	69927694	69927818	0.0514981	0.158312	0.0840096	0.692081	0.972076	0
ENSMUSG00000069601.14	Ank3	chr10	69904447	69904510	69920437	69920491	69927694	69927818	0.191758	0.153928	0.173503	0.273212	0.896772	0
ENSMUSG00000069601.14	Ank3	chr10	69950951	69951058	69953439	69953472	69955925	69955952	0.0487512	0.0413343	0.0123256	0.134207	0.896772	0
ENSMUSG00000069601.14	Ank3	chr10	69980322	69980394	69980823	69980850	69982115	69982197	0.00100963	0.011703	0.00812766	0.916337	0.999593	0
ENSMUSG00000069601.14	Ank3	chr10	69980322	69980394	69982115	69982197	69994371	69994446	0.00143053	0.0147618	0.0100299	0.900686	0.999593	0
ENSMUSG00000069601.14	Ank3	chr10	70004609	70004991	70006799	70006853	70015567	70015631	0.00771014	0.00667775	0	0.13895	0.896772	0
ENSMUSG00000048701.13	Ccdc6	chr10	70175046	70175167	70182159	70182260	70187690	70187815	0.00412044	0.0161228	0.00733704	0.714464	0.979046	0
ENSMUSG00000060733.13	Ipmk	chr10	71347842	71348090	71363449	71363535	71372704	71372880	0	0.23098	0	0.912677	0.999593	0
ENSMUSG00000060733.13	Ipmk	chr10	71347842	71348090	71363449	71363535	71372707	71372880	0.101237	0.133368	0.0818119	0.332232	0.900193	0
ENSMUSG00000060733.13	Ipmk	chr10	71363449	71363535	71366008	71366105	71372704	71372880	0.0403613	0.0470658	0.055101	0.448001	0.930278	0
ENSMUSG00000060733.13	Ipmk	chr10	71363449	71363535	71366008	71366105	71372707	71372880	0.0114495	0.0208058	0.0149179	0.505631	0.930962	0
ENSMUSG00000060733.13	Ipmk	chr10	71372707	71372880	71373867	71374053	71376704	71376786	0.0122693	0.0148181	0.00357125	0.251284	0.896772	0
ENSMUSG00000060733.13	Ipmk	chr10	71372707	71372880	71373944	71374053	71376704	71376786	0.00355904	0.00251752	0.00708879	0.557303	0.943411	0
ENSMUSG00000019923.14	Zwint	chr10	72654895	72654977	72655835	72656073	72656237	72656361	0.0276199	0.191874	0.0166612	0.903601	0.999593	0
ENSMUSG00000019923.14	Zwint	chr10	72654895	72654977	72655982	72656073	72656237	72656361	0.00185204	0.0137141	0.0100341	0.867228	0.999593	0
ENSMUSG00000019923.14	Zwint	chr10	72654895	72654977	72655982	72656696	72656816	72656873	0.00421765	0.00352232	0	0.129822	0.896772	0
ENSMUSG00000019923.14	Zwint	chr10	72654895	72654977	72656237	72656696	72656816	72656873	0.0883838	0.16511	0.0714249	0.442261	0.930278	0
ENSMUSG00000040009.6	Gnaz	chr10	74967208	74967382	74978790	74978856	74990933	74991404	0.13356	0.0780965	0.0533228	0.0713566	0.896772	0
ENSMUSG00000009681.10	Bcr	chr10	75145321	75145462	75153885	75154007	75154897	75155066	0.0209663	0.0083019	0.0148968	0.174768	0.896772	0
ENSMUSG00000009681.10	Bcr	chr10	75154897	75155066	75155670	75155715	75157077	75157197	0.0106292	0	0.00516282	0.0996313	0.896772	0
ENSMUSG00000009681.10	Bcr	chr10	75158009	75158085	75159336	75159541	75159785	75159890	0.00461301	0.0190986	0.0238398	0.827859	0.999593	0
ENSMUSG00000009681.10	Bcr	chr10	75160359	75160404	75166044	75166142	75168106	75168238	0.0254748	0.0204184	0.0260259	0.318152	0.897575	0
ENSMUSG00000009681.10	Bcr	chr10	75168106	75168238	75171334	75171942	75175276	75175336	0.0136546	0.0244118	0.00489078	0.413404	0.92455	0
ENSMUSG00000033444.14	Specc1l	chr10	75212094	75212219	75230681	75230871	75241064	75241218	0.00895822	0.00903578	0.00981534	0.360264	0.908292	0
ENSMUSG00000033444.14	Specc1l	chr10	75241064	75241218	75244365	75244487	75245078	75245131	0.0169896	0	0.0134117	0.214413	0.896772	0
ENSMUSG00000033444.14	Specc1l	chr10	75241064	75241218	75245078	75246712	75248436	75248644	0.0111292	0.0169296	0.0033914	0.341786	0.901782	0
ENSMUSG00000033444.14	Specc1l	chr10	75241064	75241218	75245078	75246830	75248436	75248644	0	0.20908	0	0.92336	0.999593	0
ENSMUSG00000033444.14	Specc1l	chr10	75248436	75248644	75257867	75257941	75258967	75259143	0.004822	0.00312124	0	0.0753775	0.896772	0
ENSMUSG00000033444.14	Specc1l	chr10	75263278	75263370	75267498	75267589	75274016	75274100	0.0196336	0.0366955	0.0679881	0.728358	0.983507	0
ENSMUSG00000033444.14	Specc1l	chr10	75263278	75263370	75267498	75267595	75274016	75274100	0.00694444	0.00515491	0.00561196	0.234242	0.896772	0
ENSMUSG00000006345.10	Ggt1	chr10	75574231	75574396	75575949	75576080	75576215	75576255	0.010225	0.0259296	0.0562871	0.819336	0.999593	0
ENSMUSG00000049764.8	Zfp280b	chr10	76032653	76032749	76032952	76033075	76038233	76038388	0.0129507	0.0157035	0.0263487	0.583684	0.947765	0
ENSMUSG00000020260.9	Pofut2	chr10	77260573	77260824	77262436	77262581	77263264	77263375	0.0429391	0.0176715	0.0493267	0.345952	0.902728	0
ENSMUSG00000020260.9	Pofut2	chr10	77264955	77265022	77265835	77265961	77266912	77267093	0.00268871	0.00448395	0.00248108	0.42997	0.930278	0
ENSMUSG00000020260.9	Pofut2	chr10	77264955	77265022	77265835	77266032	77266912	77267093	0.0180843	0.0466053	0.0392837	0.659224	0.964321	0
ENSMUSG00000009291.13	Pttg1ip	chr10	77581821	77581927	77587250	77587303	77592845	77592864	0.0433033	0.175939	0.0399738	0.647042	0.962263	0
ENSMUSG00000009291.13	Pttg1ip	chr10	77587250	77587303	77589633	77589742	77592845	77592864	0.01308	0.0224655	0.0230465	0.562387	0.944677	0
ENSMUSG00000009291.13	Pttg1ip	chr10	77592845	77593017	77593116	77593432	77593863	77593899	0.0187215	0.0442915	0.0143277	0.543267	0.941949	0
ENSMUSG00000020284.16	Cfap410	chr10	77978692	77978781	77979752	77979771	77980500	77980522	0.0182723	0.0410948	0.0174594	0.526246	0.936474	0
ENSMUSG00000000732.9	Icosl	chr10	78071160	78071279	78071737	78072091	78073706	78074000	1.11022e-16	0.181444	0	0.936743	0.999593	0
ENSMUSG00000032763.11	Ilvbl	chr10	78583014	78583129	78583219	78583389	78583463	78584500	0.0243097	0.00883699	0.0240146	0.286335	0.896772	0
ENSMUSG00000020307.15	Cdc34	chr10	79685004	79685102	79685232	79685367	79687848	79688275	0.0315035	0.0234387	0.00799354	0.100381	0.896772	0
ENSMUSG00000023175.15	Bsg	chr10	79704569	79704584	79704922	79709044	79709670	79709827	8.15218e-05	0.000239568	0.000169023	0.674356	0.967105	0
ENSMUSG00000023175.15	Bsg	chr10	79704569	79704584	79708696	79709044	79709670	79709827	0.00350901	0.00169579	0.00119712	0.0423322	0.896772	0
ENSMUSG00000023175.15	Bsg	chr10	79704569	79704584	79708890	79709044	79709670	79709827	0.000526529	0.000724547	0	0.297128	0.896772	0
ENSMUSG00000023175.15	Bsg	chr10	79704569	79704584	79709696	79709827	79710057	79710140	0.0355932	0.132106	0.0287637	0.656936	0.963995	0
ENSMUSG00000023175.15	Bsg	chr10	79704569	79704584	79709737	79709827	79710057	79710140	0	0.353553	0	0.849529	0.999593	0
ENSMUSG00000023175.15	Bsg	chr10	79704569	79704800	79704922	79709044	79709670	79709827	0	0.0282843	0	0.982686	0.999593	0
[truncated: 26,745 more rows]

## Sheet: Alt 5-prime
Ensembl	genename	chr	evpos 0	evpos 1	evpos 2	evpos 3	evpos 4	evpos 5	evpos 6	evpos 7	delta psi	std KPC-K700E	std KPC	pval	fdr	distance
ENSMUSG00000021134.17	Srsf5	chr12	80945531	80945668	80945531	80945672	80946575	80946720	80946575	80946720	0.0795651	0.00482294	0.00507931	3.82522e-05	0.609932	-5
ENSMUSG00000026860.16	Sh3glb2	chr2	30345885	30345939	30345885	30345939	30346356	30346453	30346352	30346453	0.060739	0.0073392	0.00559861	0.000160638	0.929289	-5
ENSMUSG00000094870.8	Zfp131	chr13	119788859	119788961	119788859	119788961	119790148	119790287	119789643	119790287	0.0214289	0.00298539	0.00210647	0.00023259	0.929289	-506
ENSMUSG00000002900.17	Lamb1	chr12	31265296	31265579	31265296	31265601	31266690	31266793	31266690	31266793	0.00360357	0	8.71252e-05	0.000292666	0.929289	-23
ENSMUSG00000079658.9	Eloc	chr1	16647954	16648007	16647954	16648007	16656991	16657038	16656861	16657038	0.118619	0.0189473	0.0118364	0.000420116	0.929289	-131
ENSMUSG00000059208.15	Hnrnpm	chr17	33665491	33665645	33665491	33665645	33666646	33666685	33666493	33666685	0.00814171	0.0011349	0.00095887	0.000448461	0.929289	-154
ENSMUSG00000056608.14	Chd9	chr8	90886414	90887965	90886414	90889806	90890976	90891521	90890976	90891521	0.33661	0.0632644	0.032665	0.00046075	0.929289	-1842
ENSMUSG00000030048.5	Gkn3	chr6	87385466	87385574	87385466	87385574	87387050	87387185	87386045	87387185	0.244414	0.0293252	0.000600131	0.000537753	0.929289	-1006
ENSMUSG00000020079.15	Supv3l1	chr10	62441134	62441246	62441134	62441246	62443394	62443563	62443378	62443563	0.184242	0.0305337	0.0167933	0.000586869	0.929289	-17
ENSMUSG00000016526.8	Dyrk3	chr1	131136259	131136371	131136259	131136371	131138065	131138245	131138079	131138245	0.0188708	0	0.000645649	0.000590229	0.929289	13
ENSMUSG00000026634.16	Angel2	chr1	190928852	190928904	190928852	190929246	190932866	190933192	190932866	190933192	0.186774	0.0323301	0.0236814	0.000857425	0.929289	-343
ENSMUSG00000056608.14	Chd9	chr8	90886414	90888193	90886414	90890672	90890976	90891521	90890976	90891521	0.433822	0.0139353	0.0397072	0.000885471	0.929289	-2480
ENSMUSG00000024299.17	Adamts10	chr17	33530132	33530289	33530132	33530461	33531579	33531797	33531579	33531797	0.0397622	0.00646288	0.00574028	0.00102566	0.929289	-173
ENSMUSG00000042608.15	Stk40	chr4	126118271	126118462	126118271	126118340	126123715	126123835	126123715	126123835	0.24401	0.0570008	0.0269727	0.00121005	0.929289	121
ENSMUSG00000023039.17	Krt7	chr15	101411051	101411241	101411051	101411094	101411428	101411488	101411428	101411488	0.12674	0.0284399	0.0157135	0.00127793	0.929289	146
ENSMUSG00000025135.12	Anapc11	chr11	120598531	120598604	120598531	120598870	120599241	120599368	120599241	120599368	0.282043	0.0611404	0.0165171	0.00136613	0.929289	-267
ENSMUSG00000001036.17	Epn2	chr11	61546748	61546911	61546748	61546911	61579566	61579658	61578417	61579658	0.0751995	0.0119209	0.0118595	0.00140205	0.929289	-1150
ENSMUSG00000042063.11	Zfp386	chr12	116047828	116047866	116047828	116048223	116054721	116054817	116054721	116054817	0.175049	0.0392994	0.0139913	0.00141607	0.929289	-358
ENSMUSG00000086158.2	Ccpg1os	chr9	72979721	72980196	72979721	72980196	72985140	72985376	72983798	72985376	0.0598019	0.0109629	0.00924323	0.0016679	0.929289	-1343
ENSMUSG00000025555.14	Farp1	chr14	121237135	121237231	121237135	121238379	121238627	121238659	121238627	121238659	0.0101926	0.00165182	0	0.00172827	0.929289	-1149
ENSMUSG00000031575.18	Ash2l	chr8	25833750	25833846	25833750	25833846	25834959	25835054	25834887	25835054	0.0109102	0.001773	0	0.00173749	0.929289	-73
ENSMUSG00000000787.12	Ddx3x	chrX	13286033	13286166	13286033	13286844	13287224	13287383	13287224	13287383	0.0334914	0.00589825	0	0.00213257	0.929289	-679
ENSMUSG00000029484.12	Anxa3	chr5	96793384	96793563	96793384	96794341	96797400	96797453	96797400	96797453	0.0122015	0.0027226	0.000863004	0.00218386	0.929289	-779
ENSMUSG00000025261.18	Huwe1	chrX	151923478	151923561	151923478	151923606	151924661	151924761	151924661	151924761	0.13995	0.0220723	0.0243353	0.00218539	0.929289	-46
ENSMUSG00000056608.14	Chd9	chr8	90886414	90889806	90886414	90890672	90890976	90891521	90890976	90891521	0.289207	0.0491663	0.053825	0.00221705	0.929289	-867
ENSMUSG00000026554.15	Dcaf8	chr1	172148141	172148168	172148141	172148338	172149248	172149321	172149248	172149321	0.144389	0.0368456	0.0139862	0.00230056	0.929289	-171
ENSMUSG00000079658.9	Eloc	chr1	16647954	16648007	16647954	16648007	16656821	16656878	16656861	16656878	0.0439026	0.00981208	0.00734022	0.00233769	0.929289	39
ENSMUSG00000047517.12	Dmbt1	chr7	131099119	131100474	131099119	131099319	131101937	131102085	131101937	131102085	0.00340072	0.000608538	0	0.00234707	0.929289	1154
ENSMUSG00000034807.9	Colgalt1	chr8	71621763	71621896	71621763	71622284	71622702	71622830	71622702	71622830	0.0274095	0.0049915	0.000227516	0.00248932	0.929289	-389
ENSMUSG00000063320.11	1190007I07Rik	chr10	82622707	82622824	82622707	82622824	82623093	82623137	82622964	82623137	0.155028	0.0384986	0.0118164	0.00263335	0.929289	-130
ENSMUSG00000029147.11	Ppm1g	chr5	31203571	31203674	31203571	31203674	31204085	31204156	31204029	31204156	0.013027	0.00298369	0.00222446	0.00265068	0.929289	-57
ENSMUSG00000017756.9	Slc12a7	chr13	73763722	73763890	73763722	73764542	73784518	73784613	73784518	73784613	0.0159412	0.00391901	0.00259095	0.00277615	0.929289	-653
ENSMUSG00000039623.13	Ap5z1	chr5	142476693	142476826	142476693	142477111	142477215	142478054	142477215	142478054	0.0778717	0.0145223	0	0.00282648	0.929289	-286
ENSMUSG00000090112.8	Shprh	chr10	11194180	11194369	11194180	11194374	11205180	11205273	11205180	11205273	0.0658944	0.0143866	0.00259607	0.00283353	0.929289	-6
ENSMUSG00000001419.17	Mef2d	chr3	88168251	88168458	88168251	88168344	88168631	88168655	88168631	88168655	0.0746	0.0167909	0.0130256	0.00284689	0.929289	113
ENSMUSG00000078784.8	Rbis	chr3	14606292	14606408	14606292	14606408	14607176	14607293	14606834	14607293	0.0429274	0.00622702	0.00760564	0.00303842	0.929289	-343
ENSMUSG00000020097.14	Sgpl1	chr10	61146257	61146331	61146257	61146331	61147593	61147652	61147615	61147652	0.308743	0.0766896	0.0497399	0.0031001	0.929289	21
ENSMUSG00000030536.10	Iqgap1	chr7	80760814	80760928	80760814	80760928	80762497	80762565	80761235	80762565	0.010921	0.000368521	0.00112221	0.0031629	0.929289	-1263
ENSMUSG00000021282.17	Eif5	chr12	111539800	111539911	111539800	111539882	111540129	111540302	111540129	111540302	0.0122933	0.00269935	0.00229839	0.00332795	0.929289	28
ENSMUSG00000025357.8	Dgka	chr10	128723184	128723249	128723184	128723249	128723518	128723621	128723421	128723621	0.0406797	0.0107581	0.00478292	0.00346728	0.929289	-98
ENSMUSG00000020359.13	Phykpl	chr11	51598275	51598430	51598275	51598740	51599465	51599596	51599465	51599596	0.0471035	0.0115986	0.00855676	0.00357244	0.929289	-311
ENSMUSG00000072501.5	Phf20l1	chr15	66597358	66597447	66597358	66597754	66604026	66604240	66604026	66604240	0.0924852	0.0213287	0.00354726	0.00360933	0.929289	-308
ENSMUSG00000026883.17	Dab2ip	chr2	35692332	35692469	35692332	35692410	35707647	35707704	35707647	35707704	0.113836	0.0233032	0.0213381	0.00378481	0.929289	58
ENSMUSG00000036792.12	Mbd5	chr2	49279474	49279976	49279474	49279783	49298655	49298729	49298655	49298729	0.0850173	0.0223525	0.0147314	0.0037948	0.929289	192
ENSMUSG00000032966.14	Fkbp1a	chr2	151559457	151559616	151559457	151559626	151560620	151560653	151560620	151560653	0.173092	0.0446889	0.0201721	0.00392911	0.929289	-11
ENSMUSG00000025555.14	Farp1	chr14	121035563	121035925	121035563	121036380	121101988	121102182	121101988	121102182	0.0143439	0.0028441	0.0028517	0.00417649	0.929289	-456
ENSMUSG00000057322.12	Rpl38	chr11	114668547	114668626	114668547	114668609	114668780	114668814	114668780	114668814	0.0741461	0.0214535	0.0101359	0.00420969	0.929289	16
ENSMUSG00000056608.14	Chd9	chr8	90886414	90886614	90886414	90889806	90890976	90891521	90890976	90891521	0.346625	0.104772	0.0567358	0.00424991	0.929289	-3193
ENSMUSG00000006276.10	Eps15l1	chr8	72384766	72384924	72384766	72384924	72386860	72387088	72386385	72387088	0.219391	0.0536752	0.00183426	0.00433336	0.929289	-476
ENSMUSG00000054889.10	Dsp	chr13	38191360	38191858	38191360	38193655	38194695	38194744	38194695	38194744	0.108798	0.0295764	0.0190377	0.00441765	0.929289	-1798
ENSMUSG00000026479.13	Lamc2	chr1	153158851	153158987	153158851	153158987	153166118	153166307	153166103	153166307	0.00253989	0	0.000243524	0.00455309	0.929289	-16
ENSMUSG00000046897.17	Zfp740	chr15	102204570	102204883	102204570	102205305	102207770	102207920	102207770	102207920	0.222365	0.0414814	0.0479687	0.00459855	0.929289	-423
ENSMUSG00000049807.16	Arhgap23	chr11	97463383	97463583	97463383	97463701	97464794	97464856	97464794	97464856	0.0277599	0.00698408	0.00549634	0.00466059	0.929289	-119
ENSMUSG00000054452.10	Tle5	chr10	81564094	81564158	81564094	81564717	81564847	81564910	81564847	81564910	0.0040222	0	0.000390012	0.00467807	0.929289	-560
ENSMUSG00000062202.14	Btbd9	chr17	30220098	30220144	30220098	30220144	30220509	30220570	30220344	30220570	0.0919293	0.020457	0	0.00476136	0.929289	-166
ENSMUSG00000028405.9	Aco1	chr4	40143080	40143541	40143080	40143846	40163718	40163845	40163718	40163845	0.0284801	0.00536793	0.00587532	0.00494487	0.929289	-306
ENSMUSG00000024425.4	Ndfip1	chr18	38452304	38452371	38452304	38452429	38456054	38456121	38456054	38456121	0.0065046	0.00110184	0.00129029	0.0049754	0.929289	-59
ENSMUSG00000056608.14	Chd9	chr8	90886414	90887965	90886414	90888193	90890976	90891521	90890976	90891521	0.521494	0.0146751	0.0499795	0.00506027	0.929289	-229
ENSMUSG00000045672.15	Col27a1	chr4	63324430	63324484	63324430	63324550	63324630	63324666	63324630	63324666	0.0676058	0.0175373	0.00254194	0.00517019	0.929289	-67
ENSMUSG00000042790.16	Rnf214	chr9	45866565	45866661	45866565	45866661	45867499	45867632	45866946	45867632	0.193518	0.0475047	0.0423161	0.00519064	0.929289	-554
ENSMUSG00000092341.3	Malat1	chr19	5798035	5799355	5798035	5799355	5799586	5799683	5799497	5799683	0.127215	0.0338088	0.00995925	0.00525964	0.929289	-90
ENSMUSG00000047909.11	Ankrd16	chr2	11783308	11783749	11783308	11783756	11784290	11784452	11784290	11784452	0.148637	0.0384897	0.0108195	0.00541342	0.929289	-8
ENSMUSG00000041237.12	Pklr	chr3	89136578	89136618	89136578	89136637	89137223	89137406	89137223	89137406	0.178566	0.0571389	0.0289634	0.0054321	0.929289	-20
ENSMUSG00000023039.17	Krt7	chr15	101411042	101411177	101411042	101411094	101411428	101411488	101411428	101411488	0.249207	0.0816642	0.0277297	0.00561201	0.929289	82
ENSMUSG00000029833.17	Trim24	chr6	37945520	37945687	37945520	37945789	37949221	37949398	37949221	37949398	0.158099	0.0503887	0.0255338	0.00565598	0.929289	-103
ENSMUSG00000034994.10	Eef2	chr10	81179345	81179374	81179345	81179451	81179543	81179576	81179543	81179576	0.00292774	0.000893943	0.000486531	0.00574483	0.929289	-78
ENSMUSG00000029478.16	Ncor2	chr5	125081129	125081184	125081129	125081184	125084880	125085059	125081387	125085059	0.0100425	0.00272097	0.00061623	0.00579622	0.929289	-3494
ENSMUSG00000022141.7	Nipbl	chr15	8366629	8366729	8366629	8366729	8369463	8369588	8369460	8369588	0.0251609	0.00691989	0.00151574	0.00589048	0.929289	-4
ENSMUSG00000075595.9	Zfp652	chr11	95748999	95749607	95748999	95750147	95752874	95753018	95752874	95753018	0.145692	0.040825	0.0296449	0.00594891	0.929289	-541
ENSMUSG00000048550.17	Thnsl1	chr2	21205786	21205845	21205786	21206058	21209884	21210041	21209884	21210041	0.402001	0.0907384	0.0264008	0.00602004	0.929289	-214
ENSMUSG00000022974.12	Paxbp1	chr16	91034097	91034287	91034097	91034287	91034799	91034892	91034501	91034892	0.12837	0	0.0152581	0.00624928	0.929289	-299
ENSMUSG00000026095.15	Asnsd1	chr1	53346579	53346761	53346579	53346761	53348445	53348558	53347014	53348558	0.108579	0.0329836	0.0201537	0.00634911	0.929289	-1432
ENSMUSG00000056608.14	Chd9	chr8	90886414	90886838	90886414	90889806	90890976	90891521	90890976	90891521	0.0579136	0.0163254	0.00301078	0.00635946	0.929289	-2969
ENSMUSG00000003808.18	Farsa	chr8	84856988	84857176	84856988	84857181	84860905	84860957	84860905	84860957	0.0658705	0	0.0073806	0.00641935	0.929289	-6
ENSMUSG00000036435.13	Exoc1	chr5	76537697	76537857	76537697	76537890	76542050	76542238	76542050	76542238	0.0190385	0.00585152	0.00355014	0.00642823	0.929289	-34
ENSMUSG00000022544.14	Eef2kmt	chr16	5244878	5245385	5244878	5245385	5247476	5247599	5247452	5247599	0.0534435	0.0158118	0.0107563	0.00645327	0.929289	-25
ENSMUSG00000020827.18	Mink1	chr11	70609165	70609254	70609165	70609431	70609553	70609717	70609553	70609717	0.0819044	0.0242586	0.0166521	0.0066653	0.929289	-178
ENSMUSG00000039356.15	Exosc2	chr2	31672471	31672573	31672471	31672586	31674514	31674560	31674514	31674560	0.098984	0.0299124	0.0129845	0.00668411	0.929289	-14
ENSMUSG00000020130.9	Tbc1d15	chr10	115220210	115220408	115220210	115220408	115221582	115221685	115220687	115221685	0.131116	0.0322662	0.0278983	0.00668485	0.929289	-896
ENSMUSG00000005417.17	Mprip	chr11	59744751	59744880	59744751	59744820	59748546	59748636	59748546	59748636	0.0128653	0.0040979	0.00191416	0.00671702	0.929289	59
ENSMUSG00000035545.13	Leng8	chr7	4137065	4137122	4137065	4137157	4138695	4138788	4138695	4138788	0.0196314	0.0063076	0.00325107	0.00677391	0.929289	-36
ENSMUSG00000023048.13	Prr13	chr15	102459174	102459255	102459174	102459581	102460107	102460146	102460107	102460146	0.091432	0.0203017	0.0215654	0.00712426	0.929289	-327
ENSMUSG00000026728.9	Vim	chr2	13575540	13575601	13575540	13576848	13578412	13578508	13578412	13578508	0.00425588	0	0.00051554	0.00722571	0.929289	-1248
ENSMUSG00000021775.11	Nr1d2	chr14	18211778	18211964	18211778	18211964	18214873	18215493	18213782	18215493	0.105858	0.033153	0.00798991	0.00733155	0.929289	-1092
ENSMUSG00000044475.14	Ascc1	chr10	60007726	60007826	60007726	60007830	60012461	60012559	60012461	60012559	0.0249322	0.00394116	0.005421	0.00758675	0.929289	-5
ENSMUSG00000029994.17	Anxa4	chr6	86765761	86765807	86765761	86765807	86793508	86793564	86792992	86793564	0.0158595	0.00491513	0.00338044	0.00785617	0.929289	-517
ENSMUSG00000056608.14	Chd9	chr8	90886414	90886614	90886414	90888193	90890976	90891521	90890976	90891521	0.377261	0.0201804	0.0510583	0.00790591	0.929289	-1580
ENSMUSG00000068921.14	Dap3	chr3	88942774	88942828	88942774	88942828	88950115	88950271	88949867	88950271	0.0689722	0.019538	0.0158209	0.0079193	0.929289	-249
ENSMUSG00000024259.9	Slc25a46	chr18	31600131	31600232	31600131	31600232	31602722	31602783	31602583	31602783	0.0957319	0.0331361	0.0178057	0.00817028	0.929289	-140
ENSMUSG00000054520.15	Sh3bp2	chr5	34556890	34556979	34556890	34557363	34559000	34559649	34559000	34559649	0.0229459	0.00631808	0	0.00820552	0.929289	-385
ENSMUSG00000032525.15	Nktr	chr9	121742639	121742857	121742639	121742787	121743988	121744144	121743988	121744144	0.0683044	0.0200334	0.00363155	0.00843888	0.929289	69
ENSMUSG00000025862.14	Stag2	chrX	42266085	42266275	42266085	42266476	42269380	42269507	42269380	42269507	0.140251	0.0498076	0.0173695	0.00847206	0.929289	-202
ENSMUSG00000041528.15	Rnf123	chr9	108063482	108063681	108063482	108063681	108063920	108064027	108063902	108064027	0.232331	0.0853855	0.028867	0.00860692	0.929289	-19
ENSMUSG00000040714.14	Klc3	chr7	19394500	19394721	19394500	19394721	19394884	19394948	19394802	19394948	0.0650601	0.0229891	0.0100471	0.00865183	0.929289	-83
ENSMUSG00000020523.14	Fam114a2	chr11	57505289	57505357	57505289	57505357	57506836	57506995	57506728	57506995	0.00585071	0	0.000795926	0.00907713	0.929289	-109
ENSMUSG00000025481.12	Urah	chr7	140835296	140835455	140835296	140835304	140835611	140835751	140835611	140835751	0.335581	0.129162	0.0598562	0.00913609	0.929289	150
ENSMUSG00000020747.18	Tmem94	chr11	115777298	115777309	115777298	115777377	115785439	115785559	115785439	115785559	0.00675221	0.00235365	0.000991723	0.00949882	0.929289	-69
ENSMUSG00000020076.7	Ddx50	chr10	62643296	62643372	62643296	62643372	62646971	62647201	62646913	62647201	0.0473155	0.01565	0.0102051	0.00957077	0.929289	-59
ENSMUSG00000015837.15	Sqstm1	chr11	50200166	50200947	50200166	50200947	50202512	50202588	50202288	50202588	0.0491487	0.0146739	0	0.00957185	0.929289	-225
ENSMUSG00000026519.16	Tmem63a	chr1	180942457	180942559	180942457	180942510	180946565	180946714	180946565	180946714	0.130378	0.0432008	0.0167668	0.00997501	0.929289	48
ENSMUSG00000029484.12	Anxa3	chr5	96828153	96828255	96828153	96828259	96828347	96828404	96828347	96828404	0.279405	0.0812494	0.0725013	0.010044	0.929289	-5
ENSMUSG00000024431.15	Nr3c1	chr18	39487159	39487245	39487159	39487245	39489476	39489888	39489439	39489888	0.066763	0.0188266	0.0169975	0.0100719	0.929289	-38
ENSMUSG00000009376.15	Met	chr6	17463826	17464140	17463826	17464248	17487796	17487845	17487796	17487845	0.144091	0.0460823	0.013159	0.0103071	0.929289	-109
ENSMUSG00000033943.15	Mga	chr2	119931710	119931931	119931710	119931934	119932503	119932686	119932503	119932686	0.00716892	0.00215427	0	0.0104272	0.929289	-4
ENSMUSG00000020163.12	Uqcr11	chr10	80404135	80404286	80404135	80404286	80406695	80406795	80406499	80406795	0.005948	0.00212961	0.00112339	0.0105451	0.929289	-197
ENSMUSG00000052137.11	Rbm12b2	chr4	12089662	12089795	12089662	12089727	12092522	12092572	12092522	12092572	0.0769633	0.0270017	0.0132436	0.010579	0.929289	67
ENSMUSG00000041846.15	Ppp4r3a	chr12	101043442	101043585	101043442	101043585	101044489	101044569	101044186	101044569	0.0325729	0.00993656	0.00805872	0.01067	0.929289	-304
ENSMUSG00000045757.6	Zfp764	chr7	127406165	127406279	127406165	127406279	127406457	127406783	127406420	127406783	0.145023	0.0325669	0.0350475	0.0107085	0.929289	-38
ENSMUSG00000060733.13	Ipmk	chr10	71347762	71348086	71347762	71348090	71363449	71363535	71363449	71363535	0.0435323	0.0154737	0.00668659	0.0108205	0.929289	-5
ENSMUSG00000025812.18	Pard3	chr8	127398599	127398750	127398599	127398759	127405374	127405455	127405374	127405455	0.0581139	0.0199619	0.00654534	0.0108403	0.929289	-10
ENSMUSG00000021432.15	Slc35b3	chr13	38955820	38955936	38955820	38955936	38960431	38960480	38960162	38960480	0.0381572	0.0129777	0.00860624	0.0108987	0.929289	-270
ENSMUSG00000042210.17	Abhd14a	chr9	106440793	106440856	106440793	106440856	106443826	106443942	106443805	106443942	0.115509	0.0204478	0.0261891	0.0110235	0.929289	-22
ENSMUSG00000036501.7	Fam13b	chr18	34445531	34445615	34445531	34445615	34448367	34448451	34448025	34448451	0.1093	0.0323345	0.0281595	0.0111737	0.929289	-343
ENSMUSG00000030980.17	Knop1	chr7	118850620	118850689	118850620	118850689	118852888	118853340	118852402	118853340	0.0772125	0.0226949	0.0199834	0.0112848	0.929289	-487
ENSMUSG00000031770.16	Herpud1	chr8	94392173	94392367	94392173	94392524	94393795	94393901	94393795	94393901	0.0322176	0.00991506	0	0.011313	0.929289	-158
ENSMUSG00000028249.15	Sdcbp	chr4	6365708	6365912	6365708	6365921	6377076	6377142	6377076	6377142	0.419952	0.140419	0.089658	0.0113285	0.929289	-10
ENSMUSG00000024807.18	Syvn1	chr19	6046637	6046981	6046637	6047128	6047916	6048065	6047916	6048065	0.0684795	0.024119	0.0152973	0.0116678	0.929289	-148
ENSMUSG00000020288.13	Ahsa2	chr11	23494978	23495064	23494978	23495064	23496765	23496876	23496690	23496876	0.0605452	0.0113977	0.0147238	0.0117651	0.929289	-76
ENSMUSG00000049755.14	Zfp672	chr11	58319323	58319590	58319323	58319590	58322599	58322729	58322568	58322729	0.315885	0.078862	0.0714205	0.0117983	0.929289	-32
ENSMUSG00000062995.12	Ica1	chr6	8758365	8758458	8758365	8758458	8778372	8778439	8778071	8778439	0.0618334	0.00887947	0.0146605	0.0118806	0.929289	-302
ENSMUSG00000090841.2	Myl6	chr10	128490973	128491033	128490973	128491033	128491289	128491347	128491285	128491347	0.19934	0.0746766	0.042855	0.0118846	0.929289	-5
ENSMUSG00000016487.15	Ppfibp1	chr6	146996441	146996482	146996441	146996901	146998166	146998281	146998166	146998281	0.00234018	0.000503657	0.000599441	0.0119887	0.929289	-420
ENSMUSG00000041417.15	Pik3r1	chr13	101687130	101687307	101687130	101687307	101687500	101687643	101687410	101687643	0.00564015	0	0.000886191	0.0120477	0.929289	-91
ENSMUSG00000029647.15	Pan3	chr5	147545605	147545735	147545605	147546016	147546364	147548488	147546364	147548488	0.0286914	0.0108477	0.00491359	0.0121753	0.929289	-282
ENSMUSG00000054469.14	Lclat1	chr17	73107993	73108156	73107993	73108177	73161822	73161991	73161822	73161991	0.137471	0.0449563	0.0352232	0.0122291	0.929289	-22
ENSMUSG00000037253.8	Mex3c	chr18	73573043	73573776	73573043	73573790	73589570	73592575	73589570	73592575	0.00570716	0.0018348	0.000128389	0.0122454	0.929289	-15
ENSMUSG00000056608.14	Chd9	chr8	90886414	90886838	90886414	90888193	90890976	90891521	90890976	90891521	0.394349	0.0511618	0.0759429	0.0125138	0.929289	-1356
ENSMUSG00000001847.14	Rac1	chr5	143517157	143517229	143517157	143517229	143527762	143527811	143527783	143527811	0.00291597	0.000934485	0.000748683	0.0127138	0.929289	20
ENSMUSG00000022837.14	Iqcb1	chr16	36828406	36828439	36828406	36828492	36829003	36829073	36829003	36829073	0.138625	0.0541807	0.0266374	0.0127203	0.929289	-54
ENSMUSG00000041959.14	S100a10	chr3	93555162	93555211	93555162	93555432	93560943	93561095	93560943	93561095	0.00275442	0.00097939	0.00064902	0.0128581	0.929289	-222
ENSMUSG00000062234.14	Gak	chr5	108625029	108625091	108625029	108625091	108629522	108629693	108629437	108629693	0.13217	0.0445219	0.0327917	0.0129004	0.929289	-86
ENSMUSG00000018666.13	Cbx1	chr11	96806615	96806764	96806615	96806794	96807802	96808149	96807802	96808149	0.144165	0.0356717	0.0416177	0.0130555	0.929289	-31
ENSMUSG00000058503.11	Fam133b	chr5	3558660	3558693	3558660	3559159	3559605	3559698	3559605	3559698	0.0258942	0.00752807	0.0069829	0.013255	0.929289	-467
ENSMUSG00000032217.13	Rnf111	chr9	70476249	70476668	70476249	70476668	70503042	70503242	70502939	70503242	0.0543289	0.014489	0.0144192	0.0132763	0.929289	-104
ENSMUSG00000039298.16	Cdk5rap2	chr4	70307194	70307289	70307194	70307289	70315323	70315464	70315318	70315464	0.0728238	0.0254713	0.0180929	0.0133078	0.929289	-6
ENSMUSG00000034994.10	Eef2	chr10	81179345	81179374	81179345	81179455	81179543	81179796	81179543	81179796	0.297598	0.108517	0.049306	0.0137665	0.929289	-82
ENSMUSG00000024180.14	Tmem8	chr17	26117738	26117817	26117738	26118007	26118109	26118429	26118109	26118429	0.0197695	0.00516139	0.00534764	0.0137989	0.929289	-191
ENSMUSG00000026730.12	Pter	chr2	12994749	12994820	12994749	12994890	13000856	13000980	13000856	13000980	0.115291	0.0373547	0	0.0138381	0.929289	-71
ENSMUSG00000027284.16	Cdan1	chr2	120720881	120720989	120720881	120720989	120722656	120722758	120722609	120722758	0.14937	0.0558756	0.0255256	0.0140613	0.929289	-48
ENSMUSG00000054065.12	Pkp3	chr7	141088180	141088384	141088180	141088401	141088480	141088651	141088480	141088651	0.032265	0	0.00554733	0.0146742	0.929289	-18
ENSMUSG00000030881.15	Arfip2	chr7	105637187	105637278	105637187	105637278	105637818	105637902	105637651	105637902	0.0941228	0.0314414	0.00352523	0.0147308	0.929289	-168
ENSMUSG00000025504.14	Eps8l2	chr7	141341892	141341974	141341892	141342110	141342925	141342990	141342925	141342990	0.0207259	0.00772885	0.00493617	0.0147521	0.929289	-137
ENSMUSG00000048550.17	Thnsl1	chr2	21205786	21205989	21205786	21206058	21209884	21210041	21209884	21210041	0.189125	0.0627944	0.007731	0.0148999	0.929289	-70
ENSMUSG00000035248.9	Tut7	chr13	59794446	59794504	59794446	59794504	59797669	59797756	59796819	59797756	0.0854235	0.0328107	0.0163105	0.0150332	0.929289	-851
ENSMUSG00000001248.15	Gramd1a	chr7	31134413	31134517	31134413	31134517	31135707	31135739	31135525	31135739	0.1741	0.0423431	0.0461255	0.0151056	0.929289	-183
ENSMUSG00000025261.18	Huwe1	chrX	151803242	151803382	151803242	151803569	151804445	151804511	151804445	151804511	0.32378	0.11218	0.0451	0.0153344	0.929289	-188
ENSMUSG00000035852.11	Misp	chr10	79822627	79822686	79822627	79822740	79825695	79826103	79825695	79826103	0.113284	0.0394947	0.0292882	0.015462	0.929289	-55
ENSMUSG00000048799.8	Cep120	chr18	53723082	53723305	53723082	53723305	53724353	53724581	53724349	53724581	0.0971566	0.02388	0.0259047	0.0155592	0.929289	-5
ENSMUSG00000029687.16	Ezh2	chr6	47558177	47558294	47558177	47558294	47576562	47576653	47576535	47576653	0.168797	0.0614489	0.0169001	0.0155618	0.929289	-28
ENSMUSG00000039738.16	Slx4	chr16	4001200	4001678	4001200	4001678	4003731	4003770	4003751	4003770	0.0754941	0.0154647	0.0213602	0.0155851	0.929289	19
ENSMUSG00000020390.12	Ube2b	chr11	51986666	51986810	51986666	51986810	51988611	51988673	51986905	51988673	0.0191554	0.00771757	0.00371578	0.0156065	0.929289	-1707
ENSMUSG00000020021.4	Fgd6	chr10	94043301	94045633	94043301	94045813	94074182	94074330	94074182	94074330	0.0216205	0.00857784	0.00422284	0.0157207	0.929289	-181
ENSMUSG00000006169.20	Clint1	chr11	45886430	45886535	45886430	45886539	45887385	45887550	45887385	45887550	0.00113613	0.000160994	0.000282849	0.0158496	0.929289	-5
ENSMUSG00000022538.20	Lsg1	chr16	30569328	30569430	30569328	30569430	30571041	30571241	30571164	30571241	0.0432341	0.016294	0.00413513	0.015879	0.929289	122
ENSMUSG00000054598.13	9130230L23Rik	chr5	66000883	66000977	66000883	66000977	66001266	66001333	66001231	66001333	0.19795	0.0757367	0.0481906	0.0161138	0.929289	-36
ENSMUSG00000023456.16	Tpi1	chr6	124811881	124811967	124811881	124811967	124812413	124812536	124812403	124812536	0.00802288	0.00126086	0.00205961	0.0161555	0.929289	-11
ENSMUSG00000057637.13	Prdm2	chr4	143145389	143145446	143145389	143145446	143162055	143162182	143161663	143162182	0.131634	0.0482972	0	0.0161765	0.929289	-393
ENSMUSG00000021114.9	Atp6v1d	chr12	78857226	78857344	78857226	78857344	78861418	78861495	78860864	78861495	0.0260731	0.0105568	0.00550278	0.0164118	0.929289	-555
ENSMUSG00000040434.16	Large2	chr2	92369934	92369983	92369934	92369983	92370565	92370663	92370176	92370663	0.108898	0.0447834	0.0198926	0.0164544	0.929289	-390
ENSMUSG00000038766.16	Gabpb2	chr3	95216213	95216268	95216213	95216268	95217861	95217916	95217588	95217916	0.159694	0.0242047	0.0389819	0.0165976	0.929289	-274
ENSMUSG00000069727.5	Zfp975	chr7	42665017	42665144	42665017	42665144	42692650	42692718	42692586	42692718	0.099416	0.037104	0	0.0168823	0.929289	-65
ENSMUSG00000020594.14	Pum2	chr12	8674223	8674264	8674223	8674480	8698090	8698159	8698090	8698159	0.00415316	0.00110313	0.00119613	0.0169119	0.929289	-217
ENSMUSG00000046836.13	Brox	chr1	183294776	183294864	183294776	183294864	183297181	183297228	183296902	183297228	0.0661746	0.0187021	0.0195533	0.0169885	0.929289	-280
ENSMUSG00000002763.16	Pex6	chr17	46714013	46714071	46714013	46714213	46714460	46714544	46714460	46714544	0.0363773	0.00982416	0.0103887	0.0173932	0.929289	-143
ENSMUSG00000059669.8	Taf1b	chr12	24498358	24498646	24498358	24498649	24500435	24500534	24500435	24500534	0.0383603	0.014612	0.00992431	0.0174156	0.929289	-4
ENSMUSG00000005936.19	Kctd20	chr17	28961413	28961640	28961413	28961687	28962809	28962912	28962809	28962912	0.0306854	0.0121364	0.00297672	0.0174755	0.929289	-48
ENSMUSG00000058392.13	Rrp1b	chr17	32055104	32055315	32055104	32055333	32055910	32055997	32055910	32055997	0.303253	0.138782	0.0258313	0.0174989	0.929289	-19
ENSMUSG00000085396.7	Firre	chrX	50577870	50578024	50577870	50578024	50580580	50580632	50580338	50580632	0.0841704	0.032387	0.0217056	0.0175452	0.929289	-243
ENSMUSG00000058407.12	Txndc9	chr1	37995632	37995841	37995632	37995841	37997163	37997224	37997108	37997224	0.118226	0.0243293	0.0344303	0.0175822	0.929289	-56
ENSMUSG00000038406.17	Scaf1	chr7	45013479	45013593	45013479	45013593	45014204	45014335	45013717	45014335	0.108543	0.0465465	0.0146172	0.0176588	0.929289	-488
ENSMUSG00000004221.16	Ikbkg	chrX	74433802	74433864	74433802	74434014	74437163	74437170	74437163	74437170	0.0190063	0.00782111	0.00318966	0.0176706	0.929289	-151
ENSMUSG00000022139.17	Mbnl2	chr14	120275729	120275905	120275729	120286579	120324793	120325412	120324793	120325412	0.0164574	0.0067986	0.00364965	0.0178563	0.929289	-10675
ENSMUSG00000022037.15	Clu	chr14	65971731	65971856	65971731	65971852	65973324	65973342	65973324	65973342	0.00134914	0.000554512	0.000302541	0.0182025	0.929289	3
ENSMUSG00000024188.16	Luc7l	chr17	26253973	26254044	26253973	26254388	26255030	26255125	26255030	26255125	0.133792	0.0379077	0.0411369	0.0182468	0.929289	-345
ENSMUSG00000027193.12	Api5	chr2	94411681	94413786	94411681	94413786	94418255	94418392	94418204	94418392	0.056389	0.022193	0.00379262	0.0184357	0.929289	-52
ENSMUSG00000037270.18	4932438A13Rik	chr3	37022383	37022474	37022383	37023032	37026089	37026343	37026089	37026343	0.164456	0.0364736	0.0452477	0.0185743	0.929289	-559
ENSMUSG00000001036.17	Epn2	chr11	61533588	61533681	61533588	61533681	61534577	61534613	61534391	61534613	0.0813335	0	0.0165229	0.0186152	0.929289	-187
ENSMUSG00000049550.17	Clip1	chr5	123627293	123627410	123627293	123627410	123630452	123631169	123630224	123631169	0.107512	0.0208707	0.0318198	0.0188289	0.929289	-229
ENSMUSG00000030536.10	Iqgap1	chr7	80760814	80760928	80760814	80760928	80761048	80761248	80761235	80761248	0.138967	0.00817005	0.0325617	0.0188326	0.929289	186
ENSMUSG00000028416.13	Bag1	chr4	40939076	40939184	40939076	40939184	40941524	40941638	40941496	40941638	0.00908355	0.00358089	0.00238123	0.0190784	0.929289	-29
ENSMUSG00000036528.16	Ppfibp2	chr7	107664652	107664852	107664652	107665112	107681761	107681854	107681761	107681854	0.271167	0.0346868	0.0629887	0.0192208	0.929289	-261
ENSMUSG00000079435.9	Rpl36a	chrX	134585688	134586140	134585688	134586183	134586510	134586578	134586510	134586578	0.0012564	0.000486805	0.000339625	0.0193455	0.929289	-44
ENSMUSG00000066568.12	Lsm14a	chr7	34353813	34353847	34353813	34353847	34357441	34357496	34357433	34357496	0.00326341	0	0.000652009	0.0194114	0.929289	-9
ENSMUSG00000007812.16	Zfp655	chr5	145231756	145231831	145231756	145232117	145233440	145233602	145233440	145233602	0.0259321	0.0105366	0.00200359	0.0197405	0.929289	-287
ENSMUSG00000019066.13	Rab3d	chr9	21914891	21914981	21914891	21914981	21915752	21915943	21915704	21915943	0.037948	0.0159233	0.00457448	0.019793	0.929289	-49
ENSMUSG00000033671.18	Cep350	chr1	155962474	155962560	155962474	155962560	155972848	155972890	155971767	155972890	0.0102081	0.00289334	0.00308108	0.0199094	0.929289	-1082
ENSMUSG00000025266.11	Gnl3l	chrX	151014020	151014089	151014020	151014089	151017204	151017322	151017200	151017322	0.0137353	0.00484923	0.00403843	0.0199189	0.929289	-5
ENSMUSG00000022791.19	Tnk2	chr16	32673198	32673235	32673198	32673280	32675521	32675603	32675521	32675603	0.105047	0.044114	0.0202518	0.0199507	0.929289	-46
ENSMUSG00000073758.10	Sh3d21	chr4	126162452	126162571	126162452	126162571	126162965	126163123	126162801	126163123	0.0456422	0.00928624	0.0133732	0.0199716	0.929289	-165
ENSMUSG00000034771.15	Tle2	chr10	81587091	81587757	81587091	81587800	81587873	81587946	81587873	81587946	0.137817	0.0569754	0.0121239	0.0201895	0.929289	-44
ENSMUSG00000037703.14	Lzts3	chr2	130632841	130635464	130632841	130635464	130635835	130636142	130635772	130636142	0.192842	0.0783507	0.0441358	0.0201965	0.929289	-64
ENSMUSG00000020042.15	Btbd11	chr10	85631087	85632309	85631087	85631181	85633683	85633862	85633683	85633862	0.0369754	0.0111029	0.0114286	0.0202228	0.929289	1127
ENSMUSG00000061904.12	Slc25a3	chr10	91121921	91122043	91121921	91122043	91123557	91123706	91123295	91123706	0.00955476	0.0035059	0.00277232	0.0202566	0.929289	-263
ENSMUSG00000002797.9	Ggct	chr6	54986832	54986968	54986832	54986968	54989499	54989557	54989411	54989557	0.0413457	0.0173251	0.00534464	0.020286	0.929289	-89
ENSMUSG00000040687.16	Madd	chr2	91154644	91154765	91154644	91154765	91155545	91155648	91155012	91155648	0.0168811	0.007172	0.0037686	0.0203117	0.929289	-534
ENSMUSG00000022914.17	Brwd1	chr16	96008719	96009568	96008719	96009568	96009879	96009987	96009819	96009987	0.0120019	0.00511997	0.00171359	0.0203142	0.929289	-61
ENSMUSG00000034612.7	Chst11	chr10	82985497	82985967	82985497	82985982	83092068	83092154	83092068	83092154	0.195489	0.0678596	0.0600578	0.0203165	0.929289	-16
ENSMUSG00000042207.17	Kdm5b	chr1	134560170	134560527	134560170	134560542	134585153	134585231	134585153	134585231	0.00466147	0.00133829	0.00142955	0.0207787	0.929289	-16
ENSMUSG00000068882.13	Ssb	chr2	69867271	69867379	69867271	69867552	69868778	69868850	69868778	69868850	0.00319781	0.000977063	0.000983117	0.0208896	0.929289	-174
ENSMUSG00000037784.14	Dzip1l	chr9	99629577	99629669	99629577	99629962	99632636	99632748	99632636	99632748	0.0601028	0.0262097	0.0127313	0.0209524	0.929289	-294
ENSMUSG00000004698.11	Hdac9	chr12	34431868	34431989	34431868	34431989	34433080	34433222	34433065	34433222	0.0380245	0.01412	0.0112988	0.020982	0.929289	-16
ENSMUSG00000030536.10	Iqgap1	chr7	80720868	80720991	80720868	80720991	80722965	80723128	80722961	80723128	0.00480219	0.00153018	0.00147242	0.021069	0.929289	-5
ENSMUSG00000020680.15	Taf15	chr11	83488924	83488946	83488924	83489045	83497261	83497296	83497261	83497296	0.0591607	0.0234296	0.0164918	0.0212748	0.929289	-100
ENSMUSG00000022142.8	Nup155	chr15	8141228	8141359	8141228	8141364	8142967	8143159	8142967	8143159	0.0383487	0.0152269	0	0.021574	0.929289	-6
ENSMUSG00000040860.16	Crocc	chr4	141020273	141020489	141020273	141020489	141022043	141022124	141021653	141022124	0.268813	0.0968576	0.0826693	0.0217745	0.929289	-391
ENSMUSG00000004677.17	Myo9b	chr8	71338906	71339020	71338906	71339812	71340759	71340799	71340759	71340799	0.0389643	0.0158476	0.0106173	0.0218834	0.929289	-793
ENSMUSG00000028478.18	Clta	chr4	44012685	44013002	44012685	44013008	44018812	44018850	44018812	44018850	0.0106118	0.00428205	0.00294874	0.0219712	0.929289	-7
ENSMUSG00000037692.14	Ahdc1	chr4	133061028	133061088	133061028	133061064	133061375	133061526	133061375	133061526	0.0559584	0.0218373	0	0.0220686	0.929289	23
ENSMUSG00000037646.10	Vps13b	chr15	35371525	35371698	35371525	35371777	35371932	35372098	35371932	35372098	0.0566525	0.0180764	0.0174297	0.0221357	0.929289	-80
ENSMUSG00000022940.17	Pigp	chr16	94370088	94370192	94370088	94370192	94370604	94370694	94370365	94370694	0.172489	0.0489049	0.0569639	0.0223414	0.929289	-240
ENSMUSG00000027540.13	Ptpn1	chr2	167975308	167975521	167975308	167975529	167976424	167979385	167976424	167979385	0.0130655	0.00532245	0.00363164	0.0224117	0.929289	-9
ENSMUSG00000020865.16	Abcc3	chr11	94359828	94359943	94359828	94359943	94361171	94361210	94361010	94361210	0.00577851	0.0025595	0.00101189	0.0225578	0.929289	-162
ENSMUSG00000020986.13	Sec23a	chr12	58997135	58997280	58997135	58997280	58998284	58998338	58998258	58998338	0.014544	0.00633136	0.0035312	0.0226185	0.929289	-27
ENSMUSG00000070319.6	Eif3g	chr9	20898083	20898167	20898083	20898167	20898543	20898606	20898377	20898606	0.00506052	0.00141837	0.00159025	0.0226447	0.929289	-167
ENSMUSG00000043987.18	Cep164	chr9	45776782	45776926	45776782	45776926	45778407	45778530	45778324	45778530	0.0563738	0.0193052	0.0171829	0.0226714	0.929289	-84
ENSMUSG00000027714.11	Exosc9	chr3	36556862	36556969	36556862	36556995	36561102	36561191	36561102	36561191	0.0097924	0.00354928	0.00298843	0.0227058	0.929289	-27
ENSMUSG00000004054.9	Map3k11	chr19	5697557	5697649	5697557	5699942	5700589	5700970	5700589	5700970	0.0199618	0.00671338	0.00628977	0.0227405	0.929289	-2294
ENSMUSG00000031818.12	Cox4i1	chr8	120668307	120668351	120668307	120668355	120669308	120669382	120669308	120669382	0.00122431	0.000537266	0.000164267	0.0229777	0.929289	-5
ENSMUSG00000024792.9	Zfpl1	chr19	6084351	6084461	6084351	6084461	6084863	6084894	6084794	6084894	0.15874	0.0394896	0.0516676	0.0229928	0.929289	-70
ENSMUSG00000048154.17	Kmt2d	chr15	98851394	98851531	98851394	98851531	98851606	98851789	98851602	98851789	0.0292235	0.0124951	0.00750926	0.0229974	0.929289	-5
ENSMUSG00000031505.11	Naxd	chr8	11497567	11497626	11497567	11497740	11502621	11502772	11502621	11502772	0.0951254	0.0380178	0.0269883	0.0231615	0.929289	-115
ENSMUSG00000051339.10	2900026A02Rik	chr5	113193760	113193907	113193760	113193907	113221210	113221236	113221206	113221236	0.0592172	0.0170722	0.0195662	0.0236382	0.929289	-5
ENSMUSG00000029313.18	Aff1	chr5	103754572	103754745	103754572	103775586	103783123	103783244	103783123	103783244	0.27524	0.105704	0.023639	0.0238168	0.929289	-20842
ENSMUSG00000021500.17	Ddx46	chr13	55659019	55659098	55659019	55660469	55660716	55660799	55660716	55660799	0.0908333	0.03451	0.0283341	0.0239496	0.929289	-1372
ENSMUSG00000002015.5	Bcap31	chrX	73686177	73686595	73686177	73686595	73687840	73687936	73687836	73687936	0.00799622	0	0.00178058	0.0240067	0.929289	-5
ENSMUSG00000086316.8	Nbdy	chrX	153723592	153723937	153723592	153724125	153725704	153725841	153725704	153725841	0.0273962	0	0.0062006	0.0240119	0.929289	-189
ENSMUSG00000020776.18	Fbf1	chr11	116165831	116165912	116165831	116165912	116167551	116167765	116167132	116167765	0.217027	0.104554	0.0351253	0.0241248	0.929289	-420
ENSMUSG00000022641.15	Bbx	chr16	50428909	50428981	50428909	50428981	50432241	50432309	50432110	50432309	0.103084	0.0415237	0.0300224	0.0241297	0.929289	-132
ENSMUSG00000038388.14	Mpp6	chr6	50110859	50110888	50110859	50111127	50143718	50143784	50143718	50143784	0.386862	0.060904	0.0963446	0.024196	0.929289	-240
ENSMUSG00000058325.6	Dock1	chr7	134670653	134670833	134670653	134670844	134724329	134724413	134724329	134724413	0.0138931	0.00595138	0.00108977	0.0242227	0.929289	-12
ENSMUSG00000015837.15	Sqstm1	chr11	50200166	50200947	50200166	50200947	50202398	50202429	50202288	50202429	0.0150512	0.00626859	0	0.0247611	0.929289	-111
ENSMUSG00000027366.12	Sppl2a	chr2	126912642	126912745	126912642	126912745	126913531	126913588	126913299	126913588	0.164018	0.065017	0.0515932	0.0250128	0.929289	-233
ENSMUSG00000026600.12	Soat1	chr1	156457945	156458004	156457945	156458004	156466680	156466794	156466657	156466794	0.0277967	0.0098081	0.00897025	0.0250941	0.929289	-24
ENSMUSG00000039834.17	Zfp335	chr2	164895987	164896247	164895987	164896247	164897988	164898083	164897867	164898083	0.0228434	0.010434	0.00513205	0.0254227	0.929289	-122
ENSMUSG00000002280.11	Ciao3	chr17	25781687	25781730	25781687	25781845	25782015	25782055	25782015	25782055	0.106093	0.0484301	0.0255089	0.0255721	0.929289	-116
ENSMUSG00000019254.16	Ppp1r12c	chr7	4485388	4485462	4485388	4485462	4486357	4486432	4486310	4486432	0.0545615	0.0253827	0.0121823	0.0256694	0.929289	-48
ENSMUSG00000024188.16	Luc7l	chr17	26252965	26253091	26252965	26254388	26255030	26255125	26255030	26255125	0.0406984	0.0162885	0.0125503	0.0260311	0.929289	-1298
ENSMUSG00000041225.16	Arhgap12	chr18	6115813	6115850	6115813	6115850	6135803	6135888	6135817	6135888	0.0208701	0.00828411	0.0064887	0.0262639	0.929289	13
ENSMUSG00000020122.16	Egfr	chr11	16887140	16887185	16887140	16887387	16889912	16890054	16889912	16890054	0.0152521	0.00702677	0.00204138	0.0265689	0.929289	-203
ENSMUSG00000099083.7	Atf7	chr15	102593671	102593740	102593671	102593740	102625361	102625438	102625038	102625438	0.138605	0.0610036	0.0333404	0.026674	0.929289	-324
ENSMUSG00000020982.9	Nemf	chr12	69312565	69312666	69312565	69312666	69314415	69314448	69312964	69314448	0.0496127	0.0228884	0.00607553	0.0266783	0.929289	-1452
ENSMUSG00000029062.14	Cdk11b	chr4	155624853	155625654	155624853	155625773	155626773	155626889	155626773	155626889	0.160749	0.0752119	0.0145446	0.0267796	0.929289	-120
ENSMUSG00000018427.8	Ypel2	chr11	86945932	86945976	86945932	86945976	86971808	86972024	86962213	86972024	0.0228938	0.00984726	0	0.0267922	0.929289	-9596
ENSMUSG00000004562.16	Arhgef40	chr14	51987115	51987536	51987115	51987600	51988701	51988768	51988701	51988768	0.0991088	0.042714	0.00721538	0.02688	0.929289	-65
ENSMUSG00000039218.17	Srrm2	chr17	23790531	23790812	23790531	23790945	23792389	23792511	23792389	23792511	0.170701	0.0695328	0	0.0269032	0.929289	-134
ENSMUSG00000043923.8	Ccdc84	chr9	44413136	44413201	44413136	44413201	44413470	44413533	44413442	44413533	0.20449	0.0878769	0.0337633	0.0269379	0.929289	-29
ENSMUSG00000036990.13	Otud4	chr8	79664980	79665017	79664980	79665143	79666715	79666839	79666715	79666839	0.0404931	0.0158146	0.0129306	0.0270738	0.929289	-127
ENSMUSG00000028357.13	Kif12	chr4	63169700	63169792	63169700	63169792	63170430	63170566	63170278	63170566	0.152835	0.0681823	0.0336248	0.027089	0.929289	-153
ENSMUSG00000050002.14	Idnk	chr13	58160151	58160238	58160151	58160780	58163432	58163775	58163432	58163775	0.123993	0.0509427	0.0393254	0.0271733	0.929289	-543
ENSMUSG00000078765.11	U2af1l4	chr7	30563357	30563408	30563357	30563399	30563556	30563619	30563556	30563619	0.156588	0.0657842	0.0452634	0.0272142	0.929289	8
ENSMUSG00000021686.6	Ap3b1	chr13	94542778	94542876	94542778	94542883	94547754	94547867	94547754	94547867	0.0301138	0.00582887	0.00960553	0.0272499	0.929289	-8
ENSMUSG00000028848.13	Gpn2	chr4	133584418	133584800	133584418	133584869	133585909	133586066	133585909	133586066	0.122091	0.0568318	0.0144521	0.0272791	0.929289	-70
ENSMUSG00000034135.15	Sik3	chr9	46123216	46123333	46123216	46124201	46127009	46127073	46127009	46127073	0.022278	0	0.00536106	0.0273046	0.929289	-869
ENSMUSG00000060743.12	H3f3a	chr1	180803130	180803205	180803130	180803205	180810116	180810270	180810108	180810270	0.0111701	0.00523211	0.00250943	0.0276256	0.929289	-9
ENSMUSG00000025145.13	Lrrc45	chr11	120715805	120715934	120715805	120716018	120717055	120717168	120717055	120717168	0.074328	0.0346953	0.00779712	0.0279351	0.929289	-85
ENSMUSG00000037805.15	Rpl10a	chr17	28328966	28329047	28328966	28329280	28329373	28329522	28329373	28329522	0.0229135	0.00584722	0.00766917	0.0279423	0.929289	-234
ENSMUSG00000032038.7	St3gal4	chr9	35055573	35055649	35055573	35055649	35119002	35119065	35117518	35119065	0.196006	0.031591	0.0670258	0.0279488	0.929289	-1485
ENSMUSG00000068284.14	Usf3	chr16	44198903	44199021	44198903	44199167	44200613	44200636	44200613	44200636	0.0380021	0.0176582	0.00981479	0.0280571	0.929289	-147
ENSMUSG00000033735.9	Spr	chr6	85133999	85134288	85133999	85134288	85136822	85136844	85136818	85136844	0.0276421	0.0122156	0	0.028509	0.929289	-5
ENSMUSG00000030720.16	Cln3	chr7	126574993	126575087	126574993	126575087	126575202	126575219	126575185	126575219	0.0861766	0	0.0219415	0.0285309	0.929289	-18
ENSMUSG00000035168.16	Tanc1	chr2	59790775	59790877	59790775	59790898	59791598	59791880	59791598	59791880	0.159523	0.0286422	0.0463552	0.0287487	0.929289	-22
ENSMUSG00000017774.19	Myo1c	chr11	75661733	75661816	75661733	75662127	75662234	75662315	75662234	75662315	0.00475351	0.00224496	0.000662083	0.0288873	0.929289	-312
ENSMUSG00000029304.14	Spp1	chr5	104435120	104435196	104435120	104435248	104436374	104436442	104436374	104436442	0.0237732	0.0110457	0.00231765	0.0289686	0.929289	-53
ENSMUSG00000022864.14	D16Ertd472e	chr16	78575920	78576054	78575920	78576054	78576390	78576657	78576190	78576657	0.326243	0.133558	0.0995915	0.0291644	0.929289	-201
ENSMUSG00000005514.14	Por	chr5	135731549	135731660	135731549	135731661	135732482	135732599	135732482	135732599	0.00254013	0.0011173	0	0.029215	0.929289	-2
ENSMUSG00000026987.16	Baz2b	chr2	59906915	59907051	59906915	59907051	59907543	59907749	59907438	59907749	0.0748682	0.036776	0.0142696	0.0294769	0.929289	-106
ENSMUSG00000041308.6	Sntb2	chr8	106935749	106936308	106935749	106936321	106981125	106981339	106981125	106981339	0.014574	0.00590867	0.00471014	0.029508	0.929289	-14
ENSMUSG00000041035.9	Gm17018	chr19	45571884	45571998	45571884	45572009	45572404	45572538	45572404	45572538	0.139943	0.0657624	0.0273568	0.0295145	0.929289	-12
ENSMUSG00000052752.15	Traf7	chr17	24512246	24512386	24512246	24512386	24512955	24513084	24512790	24513084	0.177388	0	0.0468648	0.0295412	0.929289	-166
ENSMUSG00000020580.10	Rock2	chr12	16953260	16953420	16953260	16953732	16954906	16954967	16954906	16954967	0.022877	0.0105764	0.00616754	0.0296318	0.929289	-313
ENSMUSG00000035545.13	Leng8	chr7	4137065	4137157	4137065	4137151	4138695	4138788	4138695	4138788	0.00750645	0.00360835	0.0016776	0.0296679	0.929289	5
ENSMUSG00000031392.18	Irak1	chrX	74019899	74019965	74019899	74019965	74020407	74020535	74020327	74020535	0.056547	0.026171	0.0066924	0.0297215	0.929289	-81
ENSMUSG00000040813.16	Tex264	chr9	106684946	106684995	106684946	106684995	106685634	106685682	106685243	106685682	0.182969	0.0905803	0.0329055	0.0297358	0.929289	-392
ENSMUSG00000041846.15	Ppp4r3a	chr12	101041876	101042051	101041876	101042051	101042478	101042645	101042454	101042645	0.0201546	0.00799301	0.00662187	0.0298814	0.929289	-25
ENSMUSG00000024365.9	Cyp21a1	chr17	34804043	34804133	34804043	34804133	34804478	34804561	34804197	34804561	0.0567017	0	0.014046	0.0299739	0.929289	-282
ENSMUSG00000031601.16	Cnot7	chr8	40494013	40494115	40494013	40494115	40495804	40495915	40495768	40495915	0.00830882	0.00385471	0.00230553	0.0300554	0.929289	-37
ENSMUSG00000040795.12	Iqcc	chr4	129618491	129618635	129618491	129618635	129619013	129619076	129618873	129619076	0.0664466	0.0118571	0.0220517	0.0303515	0.929289	-141
ENSMUSG00000079435.9	Rpl36a	chrX	134586510	134586578	134586510	134586599	134587450	134587573	134587450	134587573	0.000531184	0.000256372	0.000126183	0.0304113	0.929289	-22
ENSMUSG00000056167.8	Cnot10	chr9	114593436	114593512	114593436	114593512	114597478	114597606	114596604	114597606	0.0564786	0.0244102	0.0176567	0.0304373	0.929289	-875
ENSMUSG00000030750.13	Nsmce1	chr7	125469028	125469145	125469028	125469145	125471151	125471259	125471112	125471259	0.0451808	0.0101665	0.0148718	0.0304803	0.929289	-40
ENSMUSG00000029086.15	Prom1	chr5	44094394	44094768	44094394	44094768	44101933	44101958	44101929	44101958	0.173181	0.0373328	0.0628397	0.0305838	0.929289	-5
ENSMUSG00000056608.14	Chd9	chr8	90886414	90886614	90886414	90886838	90887959	90887965	90887959	90887965	0.150607	0.0665614	0	0.0307533	0.929289	-225
ENSMUSG00000063236.6	1110038F14Rik	chr15	76948528	76949686	76948528	76949690	76950248	76950729	76950248	76950729	0.0130026	0.00637768	0.00235106	0.0308844	0.929289	-5
ENSMUSG00000027575.19	Arfgap1	chr2	180979170	180979227	180979170	180979720	180980397	180980474	180980397	180980474	0.118516	0.056974	0.0293037	0.0310302	0.929289	-494
ENSMUSG00000033382.15	Trappc8	chr18	20845577	20845652	20845577	20845652	20846448	20846579	20846434	20846579	0.0611654	0.020225	0.0217433	0.0310396	0.929289	-15
ENSMUSG00000032584.12	Mst1r	chr9	107913323	107913485	107913323	107913499	107914219	107914381	107914219	107914381	0.11777	0.0553879	0.0290046	0.0310997	0.929289	-15
ENSMUSG00000012405.16	Rpl15	chr14	18270278	18270460	18270278	18270460	18270958	18271029	18270822	18271029	0.032631	0.012008	0.0113757	0.0311721	0.929289	-137
ENSMUSG00000035623.14	Rsf1	chr7	97631408	97631539	97631408	97631619	97636376	97636469	97636376	97636469	0.181717	0.0789329	0.0566558	0.0314123	0.929289	-81
ENSMUSG00000031601.16	Cnot7	chr8	40495804	40495915	40495804	40495915	40500751	40500913	40499294	40500913	0.0368033	0.0181184	0.00612889	0.0315207	0.929289	-1458
ENSMUSG00000039065.11	Atpsckmt	chr15	31602117	31602149	31602117	31603574	31605910	31606188	31605910	31606188	0.163462	0.0744678	0.0271964	0.0315682	0.929289	-1426
ENSMUSG00000037722.8	Gnpnat1	chr14	45384580	45384748	45384580	45384748	45388747	45388783	45388447	45388783	0.0257727	0	0.00675184	0.031791	0.929289	-301
ENSMUSG00000026319.13	Relch	chr1	105746068	105746185	105746068	105747481	105750321	105750410	105750321	105750410	0.180943	0.0878382	0	0.031865	0.929289	-1297
ENSMUSG00000030536.10	Iqgap1	chr7	80760814	80760928	80760814	80760928	80762278	80762565	80761235	80762565	0.426663	0.184186	0.083609	0.0321038	0.929289	-1044
ENSMUSG00000047517.12	Dmbt1	chr7	131086152	131086179	131086152	131087453	131088059	131088080	131088059	131088080	0.00455517	0.00172792	0.00157692	0.0322201	0.929289	-1275
ENSMUSG00000038079.14	Tmem237	chr1	59117974	59118006	59117974	59118006	59119996	59120094	59119951	59120094	0.294325	0.148054	0.0837367	0.0324037	0.929289	-46
ENSMUSG00000066036.14	Ubr4	chr4	139429491	139429636	139429491	139429655	139430123	139430340	139430123	139430340	0.0176307	0.00863641	0.00439713	0.032483	0.929289	-20
ENSMUSG00000035342.14	Lzts2	chr19	45015183	45015313	45015183	45015323	45021386	45021552	45021386	45021552	0.135987	0.00344675	0.0371368	0.0324897	0.929289	-11
ENSMUSG00000087142.7	Gm12454	chr4	43507776	43507963	43507776	43507963	43508584	43508747	43508681	43508747	0.100759	0.0319373	0.0336496	0.0324969	0.929289	96
ENSMUSG00000036980.13	Taf6	chr5	138184331	138184547	138184331	138184547	138187083	138187215	138187062	138187215	0.280449	0.141725	0	0.0325077	0.929289	-22
ENSMUSG00000040940.18	Arhgef1	chr7	24903070	24903128	24903070	24903363	24907715	24907757	24907715	24907757	0.0109662	0.00542797	0.0023966	0.03253	0.929289	-236
ENSMUSG00000032307.16	Ube2q2	chr9	55180472	55180613	55180472	55180623	55183101	55183182	55183101	55183182	0.0266687	0.0124064	0	0.0328002	0.929289	-11
ENSMUSG00000058761.5	Rnf169	chr7	99955466	99955540	99955466	99955540	99979971	99980245	99979912	99980245	0.0211543	0.00657408	0.00741895	0.0329343	0.929289	-60
ENSMUSG00000029817.11	Tra2a	chr6	49252381	49252515	49252381	49252515	49252807	49253108	49252796	49253108	0.215053	0.0972379	0.0621196	0.0329583	0.929289	-12
ENSMUSG00000027006.13	Dnajc10	chr2	80324659	80324687	80324659	80324742	80324994	80325126	80324994	80325126	0.00951683	0.00474462	0.0018335	0.0329775	0.929289	-56
ENSMUSG00000029238.11	Clock	chr5	76303423	76303502	76303423	76303502	76304372	76304548	76304367	76304548	0.0373293	0	0.00976238	0.0329952	0.929289	-6
ENSMUSG00000029484.12	Anxa3	chr5	96794192	96794341	96794192	96796148	96797400	96797453	96797400	96797453	0.114944	0.0531533	0.01159	0.0333395	0.929289	-1808
ENSMUSG00000035671.6	Zswim4	chr8	84226671	84226839	84226671	84226839	84228836	84228942	84228791	84228942	0.0139284	0.00215946	0.00446829	0.0333413	0.929289	-46
ENSMUSG00000035202.8	Lars2	chr9	123367002	123367107	123367002	123367439	123371854	123372103	123371854	123372103	0.0813118	0.0317043	0.029197	0.0334973	0.929289	-333
ENSMUSG00000020964.14	Sel1l	chr12	91831568	91831674	91831568	91831674	91833204	91833222	91833054	91833222	0.0604622	0.0125788	0.0200736	0.0335595	0.929289	-151
ENSMUSG00000044976.17	Wdr72	chr9	74157253	74157449	74157253	74157461	74179513	74179716	74179513	74179716	0.034887	0.0127707	0.0124886	0.0336576	0.929289	-13
ENSMUSG00000042105.18	Inpp5f	chr7	128664248	128664303	128664248	128664305	128667596	128667795	128667596	128667795	0.0611073	0.021685	0.0215752	0.0339331	0.929289	-3
ENSMUSG00000031565.18	Fgfr1	chr8	25563373	25563524	25563373	25564484	25566710	25566907	25566710	25566907	0.0343317	0.0166759	0.00289938	0.03396	0.929289	-961
ENSMUSG00000030516.14	Tjp1	chr7	65340222	65340426	65340222	65340426	65342616	65342719	65340861	65342719	0.00590011	0.00249472	0.00199533	0.0340588	0.929289	-1756
ENSMUSG00000031555.15	Adam9	chr8	24962859	24962903	24962859	24962903	24962984	24963088	24962957	24963088	0.529402	0.215639	0.116387	0.0342456	0.929289	-28
ENSMUSG00000019810.15	Fuca2	chr10	13514754	13514806	13514754	13514863	13515116	13515543	13515116	13515543	0.283625	0.0796731	0.0928342	0.0342473	0.929289	-58
ENSMUSG00000032525.15	Nktr	chr9	121743988	121744144	121743988	121744273	121745900	121745988	121745900	121745988	0.0381705	0.0188456	0.00384576	0.0343044	0.929289	-130
ENSMUSG00000060657.8	Marf1	chr16	14140182	14140372	14140182	14140372	14141684	14141801	14141478	14141801	0.137531	0.0613369	0.0453205	0.0345883	0.929289	-207
ENSMUSG00000005103.12	Wdr1	chr5	38529524	38529669	38529524	38529669	38529936	38530110	38529771	38530110	0.0113493	0.00571024	0.00276541	0.0348328	0.929289	-166
ENSMUSG00000020831.18	0610010K14Rik	chr11	70235205	70235468	70235205	70235468	70236023	70236211	70235996	70236211	0.103456	0.0478745	0.032699	0.0351151	0.929289	-28
ENSMUSG00000042644.9	Itpr3	chr17	27120930	27121374	27120930	27121092	27121459	27122223	27121459	27122223	0.0176797	0	0.00479297	0.0351608	0.929289	281
ENSMUSG00000058301.8	Upf1	chr8	70339742	70339841	70339742	70339841	70340014	70340099	70339981	70340099	0.0998112	0.0221702	0.0331047	0.0353866	0.929289	-34
ENSMUSG00000026004.15	Kansl1l	chr1	66801048	66802168	66801048	66802168	66817409	66817546	66817373	66817546	0.0594268	0.0290565	0.0170719	0.0354387	0.929289	-37
ENSMUSG00000002968.9	Med25	chr7	44891782	44891907	44891782	44891907	44892098	44892144	44892064	44892144	0.0248093	0.011935	0	0.035601	0.929289	-35
ENSMUSG00000029911.14	Ssbp1	chr6	40471525	40471835	40471525	40471825	40472070	40472133	40472070	40472133	0.113116	0.0565957	0.030622	0.0359441	0.929289	9
ENSMUSG00000035325.16	Sec31a	chr5	100408033	100408113	100408033	100408113	100416102	100416166	100415913	100416166	0.0739046	0.0379025	0.00814995	0.0362292	0.929289	-190
ENSMUSG00000035203.16	Epn1	chr7	5080267	5080477	5080267	5080638	5082017	5082121	5082017	5082121	0.0518613	0.0256162	0.0142528	0.0363108	0.929289	-162
ENSMUSG00000031169.13	Porcn	chrX	8201443	8201569	8201443	8201569	8203158	8203289	8203025	8203289	0.0815642	0.0217201	0.0307253	0.0363668	0.929289	-134
ENSMUSG00000024359.10	Hspa9	chr18	34952676	34952735	34952676	34952735	34954169	34954357	34953794	34954357	0.00804816	0.00263676	0.00296767	0.0364989	0.929289	-376
ENSMUSG00000032737.13	Inppl1	chr7	101831558	101831709	101831558	101831709	101831812	101831911	101831801	101831911	0.0239015	0.0096896	0.00856434	0.036571	0.929289	-12
ENSMUSG00000020422.14	Tns3	chr11	8615739	8615851	8615739	8615851	8664478	8664535	8664014	8664535	0.0841461	0.0325505	0.029796	0.0365902	0.929289	-465
ENSMUSG00000025702.15	Marchf8	chr6	116338023	116338486	116338023	116338490	116376692	116376802	116376692	116376802	0.0183497	0.0094085	0.00338746	0.036614	0.929289	-5
ENSMUSG00000047030.15	Spata2	chr2	167485512	167485593	167485512	167485593	167492762	167492845	167492758	167492845	0.120869	0.0447359	0.0428299	0.0366596	0.929289	-5
ENSMUSG00000041605.16	Inava	chr1	136226213	136226268	136226213	136226268	136226779	136226904	136226774	136226904	0.00735353	0.00379688	0.0016322	0.0369283	0.929289	-6
ENSMUSG00000035356.17	Nfkbiz	chr16	55818991	55819022	55818991	55819022	55819566	55819706	55819386	55819706	0.00309465	0.00123185	0.00111989	0.0373278	0.929289	-181
ENSMUSG00000034917.8	Tjp3	chr10	81276267	81276363	81276267	81276363	81277239	81277410	81277195	81277410	0.0102011	0.00194166	0.00351443	0.0374029	0.929289	-45
ENSMUSG00000031816.15	Mthfsd	chr8	121106869	121106973	121106869	121106973	121108287	121108298	121107990	121108298	0.0362845	0.0162869	0.0124054	0.0376128	0.929289	-298
ENSMUSG00000034211.14	Mrps17	chr5	129715533	129715570	129715533	129715549	129715683	129715763	129715683	129715763	0.038725	0.0111852	0.0141861	0.0376896	0.929289	20
ENSMUSG00000027593.15	Raly	chr2	154791132	154791231	154791132	154791548	154821006	154821089	154821006	154821089	0.0326981	0.0144842	0.0112546	0.0378207	0.929289	-318
ENSMUSG00000052033.13	Pfdn4	chr2	170514889	170515846	170514889	170515857	170516549	170516633	170516549	170516633	0.0108437	0.00469293	0.00383747	0.0382704	0.929289	-12
ENSMUSG00000079658.9	Eloc	chr1	16647954	16648007	16647954	16648007	16656911	16657018	16656861	16657018	0.32453	0.041829	0.11917	0.0384532	0.929289	-51
ENSMUSG00000005262.13	Ufd1	chr16	18814829	18814936	18814829	18814962	18815328	18815357	18815328	18815357	0.07945	0.0426602	0.0154732	0.0386974	0.929289	-27
ENSMUSG00000063659.11	Zbtb18	chr1	177442571	177442771	177442571	177442595	177447088	177447096	177447088	177447096	0.130241	0.065532	0.0353553	0.0387476	0.929289	175
ENSMUSG00000015243.4	Abca1	chr4	53071822	53072025	53071822	53072025	53072897	53072970	53072791	53072970	0.0622713	0.0288965	0.0208609	0.0387513	0.929289	-107
ENSMUSG00000069565.12	Dazap1	chr10	80278232	80278281	80278232	80279066	80280928	80281005	80280928	80281005	0.0270339	0.012475	0.00920712	0.0388014	0.929289	-786
ENSMUSG00000085396.7	Firre	chrX	50603438	50603525	50603438	50603525	50606075	50606162	50606007	50606162	0.138055	0.0488628	0.0543688	0.0392001	0.929289	-69
ENSMUSG00000029823.16	Luc7l2	chr6	38554979	38555063	38554979	38555236	38570509	38570604	38570509	38570604	0.422628	0.181126	0.156629	0.0393498	0.929289	-174
ENSMUSG00000001665.11	Gstt3	chr10	75778100	75778188	75778100	75778188	75780846	75781018	75780631	75781018	0.0283651	0.0141677	0	0.0393604	0.929289	-216
ENSMUSG00000041241.12	Mul1	chr4	138436179	138436399	138436179	138436492	138437627	138437715	138437627	138437715	0.342512	0.211923	0.0777772	0.0393731	0.929289	-94
ENSMUSG00000024422.14	Dhx16	chr17	35887935	35888202	35887935	35888231	35888354	35888422	35888354	35888422	0.040399	0	0.0119701	0.0397098	0.929289	-30
ENSMUSG00000003573.15	Homer3	chr8	70291006	70291163	70291006	70291603	70292974	70293469	70292974	70293469	0.0336654	0.0160585	0.011179	0.0397139	0.929289	-441
ENSMUSG00000018677.9	Slc25a39	chr11	102403144	102403535	102403144	102403535	102403790	102403872	102403632	102403872	0.0144926	0.00766047	0.00274246	0.0397209	0.929289	-159
ENSMUSG00000034751.17	Mast4	chr13	102853830	102853919	102853830	102853919	102905976	102906075	102905648	102906075	0.00840774	0.00430893	0.00241943	0.0397484	0.929289	-329
ENSMUSG00000006005.18	Tpr	chr1	150393541	150393750	150393541	150393658	150395198	150395302	150395198	150395302	0.00572964	0.00300152	0.000795077	0.0399174	0.929289	91
ENSMUSG00000000976.13	Heatr6	chr11	83753713	83753941	83753713	83754145	83755709	83755817	83755709	83755817	0.207789	0.0966623	0.0689294	0.0400329	0.929289	-205
ENSMUSG00000079620.13	Muc4	chr16	32750196	32752845	32750196	32753726	32754643	32757124	32754643	32757124	0.155531	0.0806325	0.0474989	0.0401298	0.929289	-882
ENSMUSG00000055839.6	Elob	chr17	23827467	23827573	23827467	23827573	23828746	23828811	23828581	23828811	0.379051	0.123398	0.158018	0.0401893	0.929289	-166
ENSMUSG00000027012.15	Dync1i2	chr2	71211833	71211845	71211833	71212074	71214438	71214555	71214438	71214555	0.11363	0.0130256	0.0357165	0.0401987	0.929289	-230
ENSMUSG00000001248.15	Gramd1a	chr7	31134413	31134517	31134413	31134517	31135688	31135739	31135596	31135739	0.0484886	0.0241271	0.0149189	0.0402713	0.929289	-93
ENSMUSG00000021288.19	Klc1	chr12	111778019	111778107	111778019	111778248	111778598	111778700	111778598	111778700	0.102753	0.0401693	0.0371907	0.0404227	0.929289	-142
ENSMUSG00000019295.8	Tmem129	chr5	33655557	33655797	33655557	33655797	33657271	33657856	33657622	33657856	0.0931494	0.0295744	0.0361377	0.0405188	0.929289	350
ENSMUSG00000026174.9	Cnot9	chr1	74506059	74506214	74506059	74506461	74517069	74517249	74517069	74517249	0.053799	0.0284039	0.0101819	0.0406328	0.929289	-248
ENSMUSG00000063810.7	Alms1	chr6	85608985	85609037	85608985	85610532	85610817	85610936	85610817	85610936	0.0889331	0.0435429	0	0.040682	0.929289	-1496
ENSMUSG00000046311.13	Zfp62	chr11	49203484	49203538	49203484	49204168	49212694	49212776	49212694	49212776	0.047427	0.00988173	0.0167906	0.0407595	0.929289	-631
ENSMUSG00000030557.17	Mef2a	chr7	67316791	67316982	67316791	67316982	67349848	67349921	67348417	67349921	0.0184736	0.00803309	0.00665986	0.0409258	0.929289	-1432
ENSMUSG00000038002.9	Cramp1l	chr17	25013967	25014025	25013967	25014025	25015529	25015782	25015430	25015782	0.037366	0.0198155	0.00633253	0.0413451	0.929289	-100
ENSMUSG00000041375.18	Ccdc9	chr7	16274044	16274416	16274044	16274416	16275255	16275375	16275279	16275375	0.220645	0.0910688	0.0887356	0.0413998	0.929289	23
ENSMUSG00000027889.17	Ampd2	chr3	108077551	108077746	108077551	108077746	108078679	108078809	108078537	108078809	0.0458287	0.0235228	0	0.0416712	0.929289	-143
ENSMUSG00000022974.12	Paxbp1	chr16	91027229	91027329	91027229	91027329	91030415	91030514	91030432	91030514	0.147529	0.0851307	0.022364	0.0417177	0.929289	16
ENSMUSG00000063011.7	Msln	chr17	25749825	25749953	25749825	25749953	25750050	25750173	25750030	25750173	0.0397321	0.00628994	0.0136848	0.0417995	0.929289	-21
ENSMUSG00000029657.15	Hsph1	chr5	149617459	149617710	149617459	149617710	149618745	149618865	149618386	149618865	0.0151616	0.00654978	0.00557125	0.0418755	0.929289	-360
ENSMUSG00000029925.13	Tbxas1	chr6	39080938	39081076	39080938	39083855	39084295	39084585	39084295	39084585	0.0936584	0.0231744	0.0340516	0.0418862	0.929289	-2780
ENSMUSG00000021843.17	Ktn1	chr14	47734154	47734264	47734154	47734270	47736099	47736279	47736099	47736279	0.107841	0.0471643	0.0398048	0.0419349	0.929289	-7
ENSMUSG00000012350.15	Ehf	chr2	103273884	103273953	103273884	103273953	103274057	103274122	103274053	103274122	0.0185162	0.0034871	0.00668326	0.0419716	0.929289	-5
ENSMUSG00000053110.13	Yap1	chr9	7938407	7938538	7938407	7938538	7952952	7953123	7952940	7953123	0.0595762	0.0144338	0.0230919	0.0421203	0.929289	-13
ENSMUSG00000015937.15	Macroh2a1	chr13	56084195	56084285	56084195	56084285	56088255	56088342	56088251	56088342	0.0403822	0.00376889	0.0129668	0.0422888	0.929289	-5
ENSMUSG00000018287.12	Spag7	chr11	70664987	70665076	70664987	70665076	70665296	70665364	70665249	70665364	0.0101574	0.00350492	0.00394921	0.0423729	0.929289	-48
ENSMUSG00000028214.13	Gem	chr4	11705806	11706199	11705806	11706241	11711969	11712174	11711969	11712174	0.155303	0.0665584	0.0566298	0.0424272	0.929289	-43
ENSMUSG00000015357.10	Clpx	chr9	65318662	65318751	65318662	65318817	65320818	65320983	65320818	65320983	0.0505743	0.0179418	0.0201213	0.0426691	0.929289	-67
ENSMUSG00000028249.15	Sdcbp	chr4	6365708	6365759	6365708	6365912	6377076	6377142	6377076	6377142	0.0120712	0.00647062	0.00328465	0.0427876	0.929289	-154
ENSMUSG00000026796.16	Fam129b	chr2	32911340	32911626	32911340	32911446	32912419	32912587	32912419	32912587	0.0175672	0.00927295	0.00168753	0.0427888	0.929289	179
ENSMUSG00000020782.18	Llgl2	chr11	115851007	115851158	115851007	115851230	115852116	115852273	115852116	115852273	0.0248239	0.0135994	0.00603833	0.0428276	0.929289	-73
ENSMUSG00000026259.14	Ngef	chr1	87476833	87477744	87476833	87477744	87479102	87479207	87479010	87479207	0.0554943	0.0289607	0.0164748	0.0428482	0.929289	-93
ENSMUSG00000008348.9	Ubc	chr5	125388233	125388264	125388233	125388264	125389909	125390014	125389696	125390014	0.00597546	0.00208568	0.00232479	0.0429999	0.929289	-214
ENSMUSG00000000823.16	Zfp512b	chr2	181590052	181590181	181590052	181590181	181590859	181590920	181590469	181590920	0.247087	0.124554	0.0395791	0.0433073	0.929289	-391
ENSMUSG00000037876.17	Jmjd1c	chr10	67215269	67215375	67215269	67218181	67218276	67218356	67218276	67218356	0.0250032	0.0130094	0.00769042	0.0433304	0.929289	-2807
ENSMUSG00000030990.18	Pgap2	chr7	102223027	102223150	102223027	102223490	102226270	102226354	102226270	102226354	0.0522604	0.0246335	0.0183893	0.0434015	0.929289	-341
ENSMUSG00000034771.15	Tle2	chr10	81587091	81587284	81587091	81587341	81587552	81587800	81587552	81587800	0.0976682	0.0517224	0.0129152	0.0435962	0.929289	-58
ENSMUSG00000019810.15	Fuca2	chr10	13514706	13514863	13514706	13514874	13515116	13515543	13515116	13515543	0.174838	0.0881529	0.0477258	0.0437365	0.929289	-12
ENSMUSG00000029432.12	Nipsnap2	chr5	129739471	129739609	129739471	129739611	129739717	129739763	129739717	129739763	0.0106204	0.00123015	0.0035836	0.0440792	0.929289	-3
ENSMUSG00000029864.7	Gstk1	chr6	42247733	42247769	42247733	42247827	42249378	42249495	42249378	42249495	0.0348467	0.0189831	0.00771251	0.0441528	0.929289	-59
ENSMUSG00000038346.18	Zfp384	chr6	125030797	125031022	125030797	125031853	125033239	125033318	125033239	125033318	0.147312	0.0783043	0.0187672	0.0444033	0.929289	-832
ENSMUSG00000022114.5	Spry2	chr14	105893567	105893801	105893567	105893801	105896587	105896819	105896424	105896819	0.0247693	0.0136229	0.00566677	0.0445304	0.929289	-164
ENSMUSG00000059939.13	9430015G10Rik	chr4	156109997	156110023	156109997	156110173	156113888	156114001	156113888	156114001	0.195752	0.100859	0.0519759	0.0447106	0.929289	-151
ENSMUSG00000070738.10	Dgkd	chr1	87880367	87880478	87880367	87880429	87881858	87881939	87881858	87881939	0.0153821	0.0066686	0.00585525	0.0447325	0.929289	48
ENSMUSG00000032480.17	Dhx30	chr9	110115490	110115582	110115490	110115582	110116838	110117087	110116677	110117087	0.125314	0.047037	0.0470053	0.0448931	0.929289	-162
ENSMUSG00000036617.17	Etl4	chr2	20785043	20785467	20785043	20785500	20788427	20788541	20788427	20788541	0.0305514	0.0169612	0.00637959	0.0448946	0.929289	-34
ENSMUSG00000027580.17	Helz2	chr2	181229817	181229909	181229817	181229909	181230333	181230450	181230066	181230450	0.159567	0.0820013	0.0109629	0.04502	0.929289	-268
ENSMUSG00000025432.11	Avil	chr10	127003365	127003512	127003365	127003450	127004696	127004771	127004696	127004771	0.0310837	0.0127091	0.0120873	0.0450942	0.929289	61
ENSMUSG00000062937.7	Mtap	chr4	89137512	89137712	89137512	89137524	89148188	89148275	89148188	89148275	0.00566761	0.00109762	0.0020935	0.0451494	0.929289	187
ENSMUSG00000048578.11	Mlec	chr5	115150815	115150994	115150815	115150994	115157802	115157865	115157289	115157865	0.00244449	0.0013395	0.000647237	0.045335	0.929289	-514
ENSMUSG00000026634.16	Angel2	chr1	190928852	190929099	190928852	190929246	190932866	190933192	190932866	190933192	0.284746	0.078308	0.10274	0.0455055	0.929289	-148
ENSMUSG00000052520.7	Cyp2j5	chr4	96659480	96659630	96659480	96659630	96663120	96663274	96663111	96663274	0.0556984	0.028836	0	0.0456659	0.929289	-10
ENSMUSG00000022637.11	Cblb	chr16	52031562	52032075	52031562	52032259	52033008	52033190	52033008	52033190	0.0938972	0.0160375	0.0334269	0.0456973	0.929289	-185
ENSMUSG00000042423.9	Fbrs	chr7	127485039	127485242	127485039	127485397	127485593	127485689	127485593	127485689	0.0604324	0.031269	0.0196419	0.0457821	0.929289	-156
ENSMUSG00000020074.7	Ccar1	chr10	62790920	62791042	62790920	62791042	62792204	62792229	62792141	62792229	0.132252	0.0585255	0.0526401	0.0457898	0.929289	-64
ENSMUSG00000026087.11	Mrpl30	chr1	37890542	37890584	37890542	37892172	37892942	37893023	37892942	37893023	0.016724	0.00418606	0.00653941	0.0458553	0.929289	-1589
ENSMUSG00000024006.17	Stk38	chr17	28979202	28979305	28979202	28979305	28979613	28979760	28979719	28979760	0.170915	0.0456461	0.0690601	0.0458894	0.929289	105
ENSMUSG00000029482.4	Aacs	chr5	125484536	125484657	125484536	125484722	125489782	125489896	125489782	125489896	0.00969724	0.00526554	0.000990346	0.0460037	0.929289	-66
ENSMUSG00000036620.14	Mgat4b	chr11	50232944	50233075	50232944	50233114	50233275	50233383	50233275	50233383	0.00506172	0.00146288	0.00200112	0.0460818	0.929289	-40
ENSMUSG00000035842.10	Ddx11	chr17	66123612	66123692	66123612	66123841	66126172	66126320	66126172	66126320	0.098838	0.0490753	0.0341601	0.046203	0.929289	-150
ENSMUSG00000003810.13	Mast2	chr4	116311213	116311368	116311213	116311368	116311741	116311788	116311678	116311788	0.0243466	0.0135671	0.00512396	0.0463263	0.929289	-64
ENSMUSG00000089832.8	Shkbp1	chr7	27348331	27348448	27348331	27348448	27348537	27348621	27348533	27348621	0.0317495	0.00428725	0.0111265	0.0466388	0.929289	-5
ENSMUSG00000037270.18	4932438A13Rik	chr3	36863120	36863307	36863120	36863348	36864386	36864485	36864386	36864485	0.0305976	0.0119893	0.0121999	0.046642	0.929289	-42
ENSMUSG00000001552.14	Jup	chr11	100386172	100386385	100386172	100386385	100397635	100397749	100397620	100397749	0.216532	0.130621	0.0409825	0.0468205	0.929289	-16
ENSMUSG00000025481.12	Urah	chr7	140835296	140835402	140835296	140835455	140835611	140835751	140835611	140835751	0.203064	0.0599264	0.0885251	0.0470236	0.929289	-54
ENSMUSG00000032786.16	Alas1	chr9	106236439	106236708	106236439	106236708	106238074	106238236	106237968	106238236	0.0192028	0.00535761	0.00769972	0.0470897	0.929289	-107
ENSMUSG00000042302.14	Ehbp1	chr11	22068358	22068506	22068358	22068506	22089584	22089668	22089524	22089668	0.119211	0.060903	0.000489436	0.047124	0.929289	-61
ENSMUSG00000021134.17	Srsf5	chr12	80945533	80945672	80945533	80945798	80946575	80946720	80946575	80946720	0.0797417	0.0348393	0.0300294	0.0472977	0.929289	-127
ENSMUSG00000019897.8	Ccdc59	chr10	105841503	105841573	105841503	105841912	105842541	105842848	105842541	105842848	0.321128	0.137626	0.129821	0.0473136	0.929289	-340
ENSMUSG00000015533.9	Itga2	chr13	114862277	114862413	114862277	114862413	114865310	114865447	114865302	114865447	0.0167004	0.00887591	0.00541844	0.0475229	0.929289	-9
ENSMUSG00000025332.14	Kdm5c	chrX	152267082	152267230	152267082	152268000	152268764	152268941	152268764	152268941	0.0337132	0.0154007	0.0128755	0.0475719	0.929289	-771
ENSMUSG00000041623.17	D11Wsu47e	chr11	113684439	113684810	113684439	113685271	113687773	113688128	113687773	113688128	0.22729	0.111995	0.0834856	0.0476759	0.929289	-462
ENSMUSG00000047879.17	Usp14	chr18	10024533	10024679	10024533	10024679	10029912	10030022	10029763	10030022	0.0528077	0.0288572	0.0164443	0.0476869	0.929289	-150
ENSMUSG00000064284.12	Cdpf1	chr15	85809211	85809324	85809211	85809324	85810901	85810989	85810842	85810989	0.156348	0.0616571	0.0642243	0.0477884	0.929289	-60
ENSMUSG00000001376.17	Vps50	chr6	3592426	3592483	3592426	3592575	3594017	3594114	3594017	3594114	0.0535123	0.0236189	0.0204497	0.0478616	0.929289	-93
ENSMUSG00000015143.15	Actn1	chr12	80209358	80209473	80209358	80209473	80223448	80258784	80221026	80258784	0.356298	0.0666173	0.117666	0.0479175	0.929289	-2423
ENSMUSG00000015363.13	Trabd	chr15	89076123	89076141	89076123	89076698	89080979	89081043	89080979	89081043	0.118856	0.068907	0.0130707	0.047949	0.929289	-558
ENSMUSG00000031818.12	Cox4i1	chr8	120668221	120668355	120668221	120668375	120669308	120669382	120669308	120669382	0.00761297	0.0034311	0.0029242	0.0480424	0.929289	-21
ENSMUSG00000022098.10	Bmp1	chr14	70486146	70486930	70486146	70486930	70490019	70490200	70488469	70490200	0.0379607	0.021459	0.00916576	0.0481272	0.929289	-1551
ENSMUSG00000035168.16	Tanc1	chr2	59646768	59646872	59646768	59647153	59699347	59699427	59699347	59699427	0.0294476	0.0159268	0.00245534	0.0482226	0.929289	-282
ENSMUSG00000018920.11	Cxcl16	chr11	70454746	70454786	70454746	70454786	70454866	70454906	70454826	70454906	0.180245	0.0963569	0.0521342	0.0482331	0.929289	-41
ENSMUSG00000056153.15	Socs6	chr18	88870764	88870918	88870764	88870918	88887212	88887333	88887208	88887333	0.108361	0.0290773	0.0415219	0.0482422	0.929289	-5
ENSMUSG00000051079.8	Rgs13	chr1	144175825	144175894	144175825	144175894	144177260	144177275	144177115	144177275	0.112551	0.0431905	0.0466315	0.0482742	0.929289	-146
ENSMUSG00000042308.14	Setd1a	chr7	127777148	127777255	127777148	127777347	127778112	127778277	127778112	127778277	0.215469	0.11082	0.0719534	0.0483269	0.929289	-93
ENSMUSG00000029478.16	Ncor2	chr5	125097946	125097999	125097946	125097999	125102651	125102696	125102642	125102696	0.00417902	0.000972057	0.00163103	0.0484955	0.929289	-10
ENSMUSG00000003382.18	Etv3	chr3	87529223	87529339	87529223	87529350	87535510	87540142	87535510	87540142	0.0280337	0.0155161	0.00779457	0.0484974	0.929289	-12
ENSMUSG00000049580.12	Tsku	chr7	98352332	98353130	98352332	98353130	98361241	98361288	98361067	98361288	0.169432	0.0656195	0.0715035	0.0485104	0.929289	-175
ENSMUSG00000020097.14	Sgpl1	chr10	61146257	61146331	61146257	61146331	61147615	61147652	61147584	61147652	0.0988429	0.0542001	0.0215512	0.04852	0.929289	-32
ENSMUSG00000058392.13	Rrp1b	chr17	32055104	32055124	32055104	32055333	32055910	32055997	32055910	32055997	0.0514355	0.0297604	0.0100471	0.0486014	0.929289	-210
ENSMUSG00000037369.17	Kdm6a	chrX	18162574	18163172	18162574	18163447	18199157	18199266	18199157	18199266	0.0107488	0.00391762	0.00436508	0.0486048	0.929289	-276
ENSMUSG00000025209.5	Twnk	chr19	45006557	45008128	45006557	45008375	45009279	45009520	45009279	45009520	0.0352539	0	0.0113451	0.0486512	0.929289	-248
ENSMUSG00000072946.12	Ptgr2	chr12	84285405	84285533	84285405	84285476	84292283	84292368	84292283	84292368	0.0384529	0.0207515	0.00220418	0.0487356	0.929289	56
ENSMUSG00000021188.14	Trip11	chr12	101890577	101890618	101890577	101890618	101893430	101893640	101893568	101893640	0.0168355	0.00883382	0.00571207	0.0488994	0.929289	137
ENSMUSG00000031229.16	Atrx	chrX	105851036	105851270	105851036	105851270	105851964	105852067	105851960	105852067	0.00380749	0.00212894	0.000454537	0.0489568	0.929289	-5
ENSMUSG00000022407.10	Adsl	chr15	80948516	80948645	80948516	80948700	80952196	80952288	80952196	80952288	0.0238789	0.0110083	0.00913747	0.0489648	0.929289	-56
ENSMUSG00000015143.15	Actn1	chr12	80209358	80209473	80209358	80209473	80229450	80229563	80223448	80229563	0.210228	0.0805605	0.0911769	0.0490956	0.929289	-6003
ENSMUSG00000084786.9	Ubl5	chr9	20644820	20644976	20644820	20644893	20645192	20645259	20645192	20645259	0.0211393	0.0120678	0.00404267	0.049205	0.929289	82
ENSMUSG00000054808.15	Actn4	chr7	28907013	28907064	28907013	28907064	28911489	28911575	28911269	28911575	0.0037037	0.00203424	0.000242492	0.0493449	0.929289	-221
ENSMUSG00000022791.19	Tnk2	chr16	32675521	32675716	32675521	32677360	32677893	32677985	32677893	32677985	0.0383578	0.0106842	0.015175	0.0493752	0.929289	-1645
ENSMUSG00000029994.17	Anxa4	chr6	86774948	86775048	86774948	86775048	86793508	86793564	86792992	86793564	0.0709523	0.0326469	0.0269374	0.0494367	0.929289	-517
ENSMUSG00000036160.13	Surf6	chr2	26899728	26899932	26899728	26899932	26902693	26902790	26902587	26902790	0.0579238	0.0319442	0	0.0494577	0.929289	-107
ENSMUSG00000004565.15	Pnpla6	chr8	3515636	3515690	3515636	3516568	3516680	3516749	3516680	3516749	0.0630607	0.0346666	0.00797739	0.0495577	0.929289	-879
ENSMUSG00000030811.14	Fbxl19	chr7	127750864	127750897	127750864	127751026	127752009	127752521	127752009	127752521	0.0593898	0.0333705	0.0139936	0.0495952	0.929289	-130
ENSMUSG00000009035.15	Tmem184b	chr15	79365284	79365479	79365284	79365479	79366586	79366678	79365786	79366678	0.0218709	0.0123077	0.00316379	0.0495984	0.929289	-801
ENSMUSG00000041161.8	Otud3	chr4	138898006	138898138	138898006	138898138	138901851	138901910	138901710	138901910	0.0710327	0.0361204	0.0256622	0.0496312	0.929289	-142
ENSMUSG00000039096.10	Rsad1	chr11	94548470	94548604	94548470	94548604	94548982	94549199	94548978	94549199	0.249993	0.0408348	0.101304	0.0498558	0.929289	-5
ENSMUSG00000020680.15	Taf15	chr11	83498446	83498555	83498446	83498560	83499072	83499182	83499072	83499182	0.233845	0.10039	0.0883883	0.0499056	0.929289	-6
ENSMUSG00000050359.7	Sprr1a	chr3	92484171	92484371	92484171	92484371	92484515	92484711	92484419	92484711	0.028315	0.0117943	0.011441	0.0499906	0.929289	-97
ENSMUSG00000037661.14	Gpr160	chr3	30855949	30856057	30855949	30856245	30877234	30877332	30877234	30877332	0.220762	0.131657	0.0572365	0.0502735	0.929289	-189
ENSMUSG00000020109.13	Dnajb12	chr10	59896349	59896495	59896349	59896501	59897490	59898014	59897490	59898014	0.0979747	0.0298895	0.0410661	0.0503221	0.929289	-7
ENSMUSG00000027397.14	Slc20a1	chr2	129204245	129204304	129204245	129205067	129206366	129206426	129206366	129206426	0.06342	0.0271933	0.0257346	0.050413	0.929289	-764
ENSMUSG00000066306.13	Numa1	chr7	101934137	101934175	101934137	101934317	101977379	101977450	101977379	101977450	0.141679	0.069339	0.0519063	0.0504795	0.929289	-143
ENSMUSG00000044471.12	Lncpint	chr6	31218679	31219135	31218679	31219135	31219997	31220224	31220060	31220224	0.0886555	0.0206197	0.0343089	0.0504907	0.929289	62
ENSMUSG00000021643.15	Serf1	chr13	100108395	100108484	100108395	100108527	100109022	100109131	100109022	100109131	0.0530303	0.0227273	0.0214275	0.0505513	0.929289	-44
ENSMUSG00000090290.2	Tarbp1	chr8	126447320	126447582	126447320	126447582	126448237	126448427	126448212	126448427	0.111161	0.05875	0	0.0506287	0.929289	-26
ENSMUSG00000022285.17	Ywhaz	chr15	36793478	36793675	36793478	36793675	36794144	36794273	36793919	36794273	0.0361871	0.0208739	0.00805759	0.0506399	0.929289	-226
ENSMUSG00000026070.15	Il18r1	chr1	40465675	40465810	40465675	40465781	40466160	40466269	40466160	40466269	0.135735	0.0451506	0.0539277	0.0506623	0.929289	28
ENSMUSG00000022362.13	Gm29394	chr15	58069318	58069429	58069318	58069429	58076156	58076183	58076085	58076183	0.046146	0.0260433	0.014285	0.0507477	0.929289	-72
ENSMUSG00000042594.16	Sh2b3	chr5	121828567	121829076	121828567	121829076	121836549	121836817	121836416	121836817	0.0998779	0.0605306	0.0248108	0.0508954	0.929289	-134
ENSMUSG00000021156.17	Zmynd11	chr13	9735331	9735466	9735331	9735466	9765160	9765207	9765054	9765207	0.274653	0.139929	0.0813088	0.0511152	0.929289	-107
ENSMUSG00000040904.10	Gm21988	chr11	70238937	70239014	70238937	70239014	70239655	70239803	70239659	70239803	0.0323287	0.00659717	0.0128304	0.0511387	0.929289	3
ENSMUSG00000001248.15	Gramd1a	chr7	31134413	31134517	31134413	31134517	31135707	31135739	31135596	31135739	0.0567484	0.0209287	0.0232023	0.0511532	0.929289	-112
ENSMUSG00000024521.8	Pmaip1	chr18	66458532	66458812	66458532	66458843	66460842	66460998	66460842	66460998	0.00117967	0.000675726	0.000178823	0.0512312	0.929289	-32
ENSMUSG00000056124.5	B4galt6	chr18	20706404	20706529	20706404	20706529	20720028	20720142	20718343	20720142	0.0265921	0.0147335	0	0.0512417	0.929289	-1686
ENSMUSG00000004187.11	Kifc2	chr15	76660707	76660852	76660707	76660765	76661005	76661087	76661005	76661087	0.101398	0.0569654	0.027309	0.0513493	0.929289	86
ENSMUSG00000045576.16	St7l	chr3	104865070	104865574	104865070	104865308	104868023	104868106	104868023	104868106	0.0537198	0.0158402	0.0217551	0.0514011	0.929289	265
ENSMUSG00000028664.14	Ephb2	chr4	136672442	136672510	136672442	136672510	136673273	136673371	136673262	136673371	0.109435	0.0318392	0.0438613	0.0514112	0.929289	-12
ENSMUSG00000049764.8	Zfp280b	chr10	76032649	76032733	76032649	76032749	76038233	76038388	76038233	76038388	0.157219	0.0720712	0.0601539	0.0517096	0.929289	-17
ENSMUSG00000078485.3	Plekhn1	chr4	156230504	156230686	156230504	156230686	156230913	156230974	156230900	156230974	0.113942	0.0658957	0.0327102	0.0517228	0.929289	-14
ENSMUSG00000024941.9	Scyl1	chr19	5769536	5769624	5769536	5769624	5770202	5770292	5769720	5770292	0.0240895	0.011433	0.00939983	0.0518244	0.929289	-483
ENSMUSG00000063362.13	Alg11	chr8	22061885	22062116	22061885	22062120	22064999	22065447	22064999	22065447	0.335292	0.0808801	0.156006	0.0518656	0.929289	-5
ENSMUSG00000038611.17	Phrf1	chr7	141228788	141228891	141228788	141229152	141231226	141231342	141231226	141231342	0.022821	0.0134288	0.00545288	0.0519529	0.929289	-262
ENSMUSG00000035310.15	Lin54	chr5	100480197	100480321	100480197	100480321	100485802	100485855	100485139	100485855	0.241637	0.130307	0.0669893	0.0522963	0.929289	-664
ENSMUSG00000024769.7	Cdc42bpg	chr19	6309125	6309190	6309125	6309217	6309298	6309382	6309298	6309382	0.020661	0	0.00692451	0.0523691	0.929289	-28
ENSMUSG00000044768.16	D1Ertd622e	chr1	97654599	97654689	97654599	97654689	97661554	97661676	97660730	97661676	0.163203	0.0944646	0.0513191	0.0524494	0.929289	-825
ENSMUSG00000060510.14	Zfp266	chr9	20508018	20508185	20508018	20508185	20521354	20521408	20521343	20521408	0.163744	0.0940892	0.0441094	0.0526024	0.929289	-12
ENSMUSG00000031098.18	Syt8	chr7	142434976	142435092	142434976	142435081	142436789	142436939	142436789	142436939	0.115671	0.0623098	0.0345098	0.052608	0.929289	10
ENSMUSG00000035632.16	Cnot3	chr7	3645308	3645595	3645308	3645584	3645992	3646065	3645992	3646065	0.115058	0.0598443	0.0427579	0.0527469	0.929289	10
ENSMUSG00000008763.16	Man1a2	chr3	100578475	100578591	100578475	100578591	100582062	100582157	100581984	100582157	0.07058	0	0.0234372	0.0528193	0.929289	-79
ENSMUSG00000013622.15	Atraid	chr5	31049461	31049483	31049461	31049580	31052196	31052268	31052196	31052268	0.0791075	0.0438582	0.00413513	0.0531123	0.929289	-98
ENSMUSG00000039745.8	Htatip2	chr7	49759128	49759145	49759128	49759311	49759541	49759790	49759541	49759790	0.14762	0.0652421	0.0564671	0.0532349	0.929289	-167
ENSMUSG00000085396.7	Firre	chrX	50606075	50606162	50606075	50606162	50608477	50608604	50608470	50608604	0.138041	0.0607142	0.0589799	0.0532446	0.929289	-8
ENSMUSG00000023175.15	Bsg	chr10	79710637	79710724	79710637	79710740	79710839	79710920	79710839	79710920	0.109693	0.0440362	0.0443229	0.0532949	0.929289	-17
ENSMUSG00000031712.10	Il15	chr8	82379493	82379615	82379493	82379615	82402289	82402366	82402299	82402366	0.249132	0.113939	0.10158	0.0534379	0.929289	9
ENSMUSG00000024937.15	Ehbp1l1	chr19	5717038	5717196	5717038	5717196	5720184	5720216	5719773	5720216	0.105534	0.0602261	0.0150497	0.0534676	0.929289	-412
ENSMUSG00000027803.14	Wwtr1	chr3	57574822	57575257	57574822	57575257	57575713	57575828	57575600	57575828	0.010001	0.0020768	0.00397651	0.0536386	0.929289	-114
ENSMUSG00000020159.8	Gabrp	chr11	33573317	33573416	33573317	33573416	33578805	33578957	33578749	33578957	0.00602457	0.00250063	0.00249363	0.0537742	0.929289	-57
ENSMUSG00000022637.11	Cblb	chr16	52032216	52032298	52032216	52032259	52033008	52033190	52033008	52033190	0.174441	0.106231	0.0452239	0.0539811	0.929289	38
ENSMUSG00000005087.17	Cd44	chr2	102839357	102839477	102839357	102839477	102842835	102842949	102842260	102842949	0.0381482	0.0155109	0.0157952	0.0540492	0.929289	-576
ENSMUSG00000031565.18	Fgfr1	chr8	25563373	25563524	25563373	25564433	25566710	25566907	25566710	25566907	0.285038	0.154741	0.102255	0.0540964	0.929289	-910
ENSMUSG00000050931.7	Sgms2	chr3	131342233	131342460	131342233	131342460	131490407	131490479	131488977	131490479	0.0258648	0.0151397	0.00377396	0.05413	0.929289	-1431
ENSMUSG00000022089.9	Bin3	chr14	70123840	70123881	70123840	70124042	70124182	70124243	70124182	70124243	0.0493197	0.0246316	0.0189478	0.0542097	0.929289	-162
ENSMUSG00000057497.8	Fam136a	chr6	86366609	86366750	86366609	86366893	86368730	86368798	86368730	86368798	0.0270681	0.0159278	0.00671536	0.0545984	0.929289	-144
ENSMUSG00000071793.12	2610005L07Rik	chr8	20405120	20405419	20405120	20405419	20410523	20410565	20410424	20410565	0.0258101	0.0150072	0.00761489	0.0548259	0.929289	-100
ENSMUSG00000028677.19	Rnf220	chr4	117285928	117285972	117285928	117285972	117288369	117289068	117288362	117289068	0.167782	0.0783747	0.0695871	0.0553024	0.929289	-8
ENSMUSG00000037957.14	Wdr20	chr12	110738017	110738092	110738017	110738277	110779295	110779478	110779295	110779478	0.0423332	0.0220828	0.015976	0.0554472	0.929289	-186
ENSMUSG00000060147.15	Serpinb6a	chr13	33931582	33931646	33931582	33931646	33935572	33935794	33935568	33935794	0.172032	0.0922574	0.0559412	0.0556962	0.929289	-5
ENSMUSG00000028059.16	Arhgef2	chr3	88631910	88631978	88631910	88632333	88632912	88632926	88632912	88632926	0.102047	0.0565025	0.0331975	0.0557238	0.929289	-356
ENSMUSG00000031976.14	Urb2	chr8	124035027	124035175	124035027	124035188	124036635	124036746	124036635	124036746	0.231852	0.0482193	0.0864099	0.0559026	0.929289	-14
ENSMUSG00000040488.18	Ltbp4	chr7	27324086	27324206	27324086	27324206	27324293	27324329	27324301	27324329	0.0314548	0.0185586	0.0061053	0.055979	0.929289	7
ENSMUSG00000017756.9	Slc12a7	chr13	73808984	73809092	73808984	73809112	73809905	73810084	73809905	73810084	0.0070416	0.00324111	0.00290087	0.0560551	0.929289	-21
ENSMUSG00000048154.17	Kmt2d	chr15	98860633	98860744	98860633	98860744	98861050	98861164	98861047	98861164	0.066651	0.0397003	0.00665198	0.056163	0.929289	-4
ENSMUSG00000021134.17	Srsf5	chr12	80948128	80948466	80948128	80948555	80949094	80949168	80949094	80949168	0.348758	0.16303	0.148627	0.0562989	0.929289	-90
ENSMUSG00000026718.17	Stam	chr2	14115816	14115892	14115816	14116073	14117388	14117535	14117388	14117535	0.0350072	0.00831563	0.01458	0.0563602	0.929289	-182
ENSMUSG00000039318.12	Rab3gap2	chr1	185266900	185267014	185266900	185267074	185267172	185267279	185267172	185267279	0.0965331	0.052154	0.0350812	0.056434	0.929289	-61
ENSMUSG00000029171.12	Pgm2	chr5	64105754	64105936	64105754	64105944	64106607	64106705	64106607	64106705	0.0285579	0.0170457	0.0057533	0.0565547	0.929289	-9
ENSMUSG00000031858.16	Mau2	chr8	70022619	70022669	70022619	70022669	70023613	70023697	70023610	70023697	0.107747	0.0621027	0.0267378	0.0566294	0.929289	-4
ENSMUSG00000041415.10	Dicer1	chr12	104709784	104709860	104709784	104709860	104710683	104710757	104710624	104710757	0.0333274	0.0190548	0.0105934	0.0566925	0.929289	-60
ENSMUSG00000024299.17	Adamts10	chr17	33537718	33538701	33537718	33538712	33543197	33543225	33543197	33543225	0.0643544	0.0276213	0.027717	0.0567134	0.929289	-12
ENSMUSG00000027287.14	Snap23	chr2	120567690	120567761	120567690	120567806	120584268	120584365	120584268	120584365	0.0351668	0.0204751	0.00216251	0.0567288	0.929289	-46
ENSMUSG00000028312.19	Smc2	chr4	52439242	52439334	52439242	52439410	52440200	52440257	52440200	52440257	0.116131	0.0679371	0.0282076	0.0567627	0.929289	-77
ENSMUSG00000026637.13	Traf5	chr1	192057139	192057214	192057139	192057214	192058002	192058052	192057974	192058052	0.0990829	0.0424641	0.0412096	0.0568423	0.929289	-29
ENSMUSG00000032966.14	Fkbp1a	chr2	151559457	151559620	151559457	151559626	151560620	151560653	151560620	151560653	0.00972882	0.00100467	0.00364829	0.0568763	0.929289	-7
ENSMUSG00000039232.12	Stx11	chr10	12941827	12941983	12941827	12941983	12964114	12964258	12963999	12964258	0.116705	0.0511996	0.0481389	0.0569036	0.929289	-116
ENSMUSG00000007564.15	Ppp2r1a	chr17	20965293	20965366	20965293	20965330	20965454	20965905	20965454	20965905	0.00592595	0.00348006	0.00175489	0.0569617	0.929289	35
ENSMUSG00000021916.16	Glt8d1	chr14	31009734	31009770	31009734	31009852	31010080	31010165	31010080	31010165	0.27449	0.147607	0.0312074	0.0569921	0.929289	-83
ENSMUSG00000022636.13	Alcam	chr16	52295662	52295750	52295662	52295750	52296919	52296933	52296702	52296933	0.00235109	0	0.000830801	0.0570439	0.929289	-218
ENSMUSG00000021598.9	Med10	chr13	69813703	69813806	69813703	69815242	69815590	69815832	69815590	69815832	0.0158582	0	0.00564221	0.0570503	0.929289	-1437
ENSMUSG00000029823.16	Luc7l2	chr6	38568846	38568917	38568846	38570009	38570509	38570604	38570509	38570604	0.103615	0.0198416	0.0431501	0.0570527	0.929289	-1093
ENSMUSG00000028621.17	Cyb5rl	chr4	107068611	107068823	107068611	107070547	107070869	107070915	107070869	107070915	0.130636	0.0681936	0.0517734	0.0571013	0.929289	-1725
ENSMUSG00000085830.1	Grin1os	chr2	25295938	25296041	25295938	25296138	25296580	25298925	25296580	25298925	0.180556	0.0791913	0.0729555	0.0571027	0.929289	-98
ENSMUSG00000063659.11	Zbtb18	chr1	177443223	177443341	177443223	177444092	177447088	177447096	177447088	177447096	0.148785	0.0674851	0.0606189	0.0573364	0.929289	-752
ENSMUSG00000022109.6	Med4	chr14	73516635	73517326	73516635	73517338	73517893	73518545	73517893	73518545	0.0162784	0	0.00574145	0.0573982	0.929289	-13
ENSMUSG00000061028.7	Clasrp	chr7	19591992	19592077	19591992	19592077	19594404	19594552	19593039	19594552	0.0805201	0.0339258	0.0337166	0.0575923	0.929289	-1366
ENSMUSG00000034616.17	Ssh3	chr19	4264313	4264460	4264313	4264460	4265291	4265420	4265102	4265420	0.0262625	0.015027	0	0.0576328	0.929289	-190
ENSMUSG00000045411.16	2410002F23Rik	chr7	44247230	44247416	44247230	44248059	44248251	44248295	44248251	44248295	0.094027	0.0254893	0.0408986	0.0576376	0.929289	-644
ENSMUSG00000006215.12	Zbtb17	chr4	141465976	141466201	141465976	141466107	141466347	141466557	141466347	141466557	0.0479959	0.0290889	0.0120289	0.0577847	0.929289	93
ENSMUSG00000038482.11	Tfdp1	chr8	13338820	13338920	13338820	13339146	13339664	13339739	13339664	13339739	0.0447753	0.0260614	0.0125267	0.0578728	0.929289	-227
ENSMUSG00000006304.14	Arpc2	chr1	74236817	74237047	74236817	74236899	74246079	74246114	74246079	74246114	0.00488824	0.00284498	0.0002779	0.0578877	0.929289	147
ENSMUSG00000033799.10	Tasor2	chr13	3599938	3600062	3599938	3600062	3600300	3600334	3600191	3600334	0.0452354	0.0243951	0.0166844	0.057946	0.929289	-110
ENSMUSG00000047888.10	Tnrc6b	chr15	80759592	80759630	80759592	80759792	80784738	80784806	80784738	80784806	0.00409429	0.00237095	7.04244e-05	0.0579971	0.929289	-163
ENSMUSG00000025155.15	Dus1l	chr11	120793027	120793110	120793027	120793110	120793867	120793886	120793833	120793886	0.0382359	0.0113951	0.0162373	0.0581262	0.929289	-35
ENSMUSG00000022185.19	Acin1	chr14	54648087	54648130	54648087	54648130	54649521	54650188	54649531	54650188	0.196338	0.0697593	0.0892718	0.0581379	0.929289	9
ENSMUSG00000022788.16	Fgd4	chr16	16484089	16484597	16484089	16484597	16490426	16490606	16490422	16490606	0.0406636	0.0219247	0.0150919	0.058218	0.929289	-5
ENSMUSG00000039615.9	Stub1	chr17	25831543	25831631	25831543	25831631	25831795	25831909	25831729	25831909	0.0397057	0.0230311	0	0.0582807	0.929289	-67
ENSMUSG00000006800.14	Sulf2	chr2	166141713	166141766	166141713	166141766	166155077	166155285	166154946	166155285	0.1295	0.0720607	0	0.0582997	0.929289	-132
ENSMUSG00000003051.13	Elf3	chr1	135254303	135254380	135254303	135254380	135254924	135254937	135254503	135254937	0.00228302	0.0013526	0.000678265	0.0583859	0.929289	-422
ENSMUSG00000032777.9	Gtf3c1	chr7	125654466	125654579	125654466	125654579	125655843	125655891	125654704	125655891	0.0186155	0.0113007	0.00433149	0.0586223	0.929289	-1140
ENSMUSG00000026918.16	Brd3	chr2	27452832	27453074	27452832	27453074	27454312	27454504	27453256	27454504	0.00447835	0.00267979	0.000551378	0.0586498	0.929289	-1057
ENSMUSG00000036167.16	Pphln1	chr15	93398349	93398457	93398349	93398461	93410691	93410783	93410691	93410783	0.0453971	0.00325573	0.0166317	0.0586877	0.929289	-5
ENSMUSG00000024028.7	Tff2	chr17	31143113	31143263	31143113	31143263	31144169	31144282	31143839	31144282	0.00426782	0.00225457	0.00164448	0.058774	0.929289	-331
ENSMUSG00000037685.15	Atp8a1	chr5	67776167	67776198	67776167	67776198	67780987	67781061	67780808	67781061	0.0366268	0.0098708	0.0152985	0.0589761	0.929289	-180
ENSMUSG00000033444.14	Specc1l	chr10	75245078	75246712	75245078	75246830	75248436	75248644	75248436	75248644	0.0160731	0.00982623	0.00276018	0.05906	0.929289	-119
ENSMUSG00000025372.16	Baiap2	chr11	119960156	119960243	119960156	119965088	119980788	119980850	119980788	119980850	0.00666531	0.00389545	0	0.0591068	0.929289	-4846
ENSMUSG00000021738.5	Atxn7	chr14	14096193	14096315	14096193	14096921	14099934	14100017	14099934	14100017	0.0505747	0.0295271	0	0.0591303	0.929289	-607
ENSMUSG00000032977.9	Fam207a	chr10	77489997	77490066	77489997	77490066	77497362	77497455	77497255	77497455	0.0236253	0.00829639	0.0104266	0.0595625	0.929289	-108
ENSMUSG00000024911.7	Fibp	chr19	5463170	5464215	5463170	5464431	5464924	5465049	5464924	5465049	0.0203127	0.0118861	0.00652828	0.0596027	0.929289	-217
ENSMUSG00000036323.14	Srp72	chr5	76994835	76994913	76994835	76995094	76995777	76995915	76995777	76995915	0.00586821	0.00343734	0	0.0596744	0.929289	-182
ENSMUSG00000025521.15	Tmem192	chr8	64964197	64964332	64964197	64964532	64965538	64965591	64965538	64965591	0.13283	0.0402803	0.0621622	0.0597073	0.929289	-201
ENSMUSG00000027699.19	Ect2	chr3	27150028	27150180	27150028	27150180	27153702	27153810	27153622	27153810	0.0317384	0	0.0116143	0.059785	0.929289	-81
ENSMUSG00000049807.16	Arhgap23	chr11	97463383	97463583	97463383	97463615	97464794	97464856	97464794	97464856	0.114192	0.0603744	0.0442835	0.0598715	0.929289	-33
ENSMUSG00000002803.14	Btbd6	chr12	112976481	112976982	112976481	112977149	112977252	112977371	112977252	112977371	0.0284323	0.017149	0.00360041	0.0600353	0.929289	-168
ENSMUSG00000010277.7	2610507B11Rik	chr11	78261751	78261913	78261751	78261917	78262698	78262828	78262698	78262828	0.00693864	0.00367332	0.00271035	0.0600888	0.929289	-5
ENSMUSG00000063108.15	Zfp26	chr9	20440191	20440275	20440191	20440275	20441328	20441374	20441332	20441374	0.0285251	0.0150801	0.0112658	0.0602964	0.929289	3
ENSMUSG00000035382.9	Pcsk7	chr9	45910425	45910523	45910425	45910509	45911083	45911249	45911083	45911249	0.0222509	0.0130288	0	0.060391	0.929289	13
ENSMUSG00000005087.17	Cd44	chr2	102837812	102837938	102837812	102837938	102842835	102842949	102842260	102842949	0.0789172	0.046447	0	0.0605098	0.929289	-576
ENSMUSG00000064120.14	Mocs1	chr17	49452794	49452842	49452794	49452857	49454029	49454201	49454029	49454201	0.0974189	0.0321867	0.0439321	0.0605141	0.929289	-16
ENSMUSG00000031295.13	Phka2	chrX	160586778	160586949	160586778	160586954	160588964	160589018	160588964	160589018	0.0719622	0.0339831	0.0300897	0.0605314	0.929289	-6
ENSMUSG00000056536.14	Pign	chr1	105587979	105588071	105587979	105588071	105589048	105589141	105589038	105589141	0.0465387	0	0.0172139	0.0605646	0.929289	-11
ENSMUSG00000024985.20	Tcf7l2	chr19	55910578	55910669	55910578	55910681	55912558	55912637	55912558	55912637	0.0541673	0.0335085	0.0072269	0.0606724	0.929289	-13
ENSMUSG00000026074.15	Map4k4	chr1	40001429	40001591	40001429	40003987	40004806	40004910	40004806	40004910	0.0461145	0.0278549	0.0058578	0.0607087	0.929289	-2397
ENSMUSG00000008348.9	Ubc	chr5	125387329	125388264	125387329	125388264	125389909	125390014	125389496	125390014	0.261474	0.0615901	0.125378	0.0607377	0.929289	-414
ENSMUSG00000022272.17	Myo10	chr15	25739286	25739369	25739286	25739674	25742340	25742449	25742340	25742449	0.0104379	0.00432627	0.00458474	0.0607826	0.929289	-306
ENSMUSG00000020079.15	Supv3l1	chr10	62441134	62441246	62441134	62441246	62443253	62443414	62443378	62443414	0.307843	0.17208	0.0343089	0.0609991	0.929289	124
ENSMUSG00000031150.13	Ccdc120	chrX	7731713	7734098	7731713	7734098	7735300	7735475	7735071	7735475	0.180822	0.104446	0.0408403	0.0610212	0.929289	-230
ENSMUSG00000050812.18	Ecpas	chr4	58803669	58803758	58803669	58803758	58805540	58805646	58805519	58805646	0.0551801	0.0346295	0.0155836	0.0611554	0.929289	-22
ENSMUSG00000069601.14	Ank3	chr10	69710973	69711173	69710973	69711187	69808415	69808517	69808415	69808517	0.33902	0.142529	0.136985	0.0613071	0.929289	-15
ENSMUSG00000028796.17	Phc2	chr4	128743353	128743461	128743353	128743556	128745001	128745008	128745001	128745008	0.0537892	0.0165606	0.0231887	0.061479	0.929289	-96
ENSMUSG00000001036.17	Epn2	chr11	61521658	61521874	61521658	61521874	61523028	61523185	61522405	61523185	0.0326418	0.0197593	0.00408466	0.0615157	0.929289	-624
ENSMUSG00000076258.1	Gm23935	chr16	11143857	11144057	11143857	11144066	11144124	11144130	11144124	11144130	0.0331883	0.01463	0.0145875	0.0616036	0.929289	-10
ENSMUSG00000026730.12	Pter	chr2	12978159	12978413	12978159	12978617	12980292	12980529	12980292	12980529	0.0705099	0	0.025565	0.0616853	0.929289	-205
ENSMUSG00000027433.5	Xrn2	chr2	147029494	147029628	147029494	147029784	147034853	147034898	147034853	147034898	0.190967	0.11365	0.0500692	0.0616972	0.929289	-157
ENSMUSG00000093931.2	Amy2a3	chr3	113316952	113317071	113316952	113317071	113318233	113318332	113318234	113318332	0.00199056	0.0010291	0.000806255	0.0617099	0.929289	0
ENSMUSG00000041130.10	Zfp598	chr17	24677834	24677985	24677834	24678052	24678595	24678704	24678595	24678704	0.00899983	0.00534997	0	0.0618338	0.929289	-68
ENSMUSG00000026796.16	Fam129b	chr2	32919702	32919865	32919702	32920231	32920952	32921024	32920952	32921024	0.00762909	0.00463163	0.0022579	0.0620855	0.929289	-367
ENSMUSG00000056608.14	Chd9	chr8	90886414	90887965	90886414	90888193	90890987	90891521	90890987	90891521	0.649173	0.382022	0	0.062356	0.929289	-229
ENSMUSG00000036980.13	Taf6	chr5	138184331	138184547	138184331	138184547	138187083	138187215	138186961	138187215	0.216244	0.139789	0.0374743	0.0623568	0.929289	-123
ENSMUSG00000024393.14	Prrc2a	chr17	35160096	35160187	35160096	35160187	35160451	35160594	35160375	35160594	0.0109732	0.00655532	0	0.0624701	0.929289	-77
ENSMUSG00000022575.5	Gsdmd	chr15	75863404	75863628	75863404	75864436	75864948	75865117	75864948	75865117	0.0178645	0.0107944	0.00158286	0.062525	0.929289	-809
ENSMUSG00000014791.10	Elmo3	chr8	105305966	105305996	105305966	105306007	105306114	105306187	105306114	105306187	0.0645058	0.0197419	0.02794	0.0625271	0.929289	-12
ENSMUSG00000001436.15	Slc19a1	chr10	77033318	77033450	77033318	77033347	77038349	77038579	77038349	77038579	0.267171	0.0750374	0.110483	0.0626052	0.929289	102
ENSMUSG00000042228.14	Lyn	chr4	3738724	3738798	3738724	3738861	3743196	3743302	3743196	3743302	0.205237	0.100714	0.0872801	0.0628264	0.929289	-64
ENSMUSG00000029761.16	Cald1	chr6	34745951	34746090	34745951	34746639	34753442	34753507	34753442	34753507	0.0858287	0.0457994	0.0338005	0.0628526	0.929289	-550
ENSMUSG00000046897.17	Zfp740	chr15	102204570	102204883	102204570	102205086	102207770	102207920	102207770	102207920	0.189445	0.0626647	0.0883359	0.0628532	0.929289	-204
ENSMUSG00000032249.14	Anp32a	chr9	62374653	62374733	62374653	62374751	62377299	62377307	62377299	62377307	0.00835592	0.00471559	0.00311844	0.0629686	0.929289	-19
ENSMUSG00000030103.11	Bhlhe40	chr6	108661504	108661851	108661504	108661612	108662520	108662644	108662520	108662644	0.00330122	0.00141238	0.00145687	0.0631121	0.929289	238
ENSMUSG00000022231.10	Sema5a	chr15	32245102	32245299	32245102	32246030	32347219	32347316	32347219	32347316	0.0594974	0.0261677	0.0266616	0.0633647	0.929289	-732
ENSMUSG00000042570.14	Mier2	chr10	79549635	79549853	79549635	79549853	79550319	79550406	79550315	79550406	0.0889684	0.0553162	0.0268676	0.0633897	0.929289	-5
ENSMUSG00000021583.7	Erap1	chr13	74639872	74639937	74639872	74639893	74646170	74646459	74646170	74646459	0.0278793	0.0167601	0	0.0635749	0.929289	43
ENSMUSG00000032525.15	Nktr	chr9	121728577	121730024	121728577	121729680	121731477	121731515	121731477	121731515	0.143753	0.0923742	0.030706	0.0638336	0.929289	343
ENSMUSG00000026126.15	Ptpn18	chr1	34459776	34459844	34459776	34459905	34462701	34462810	34462701	34462810	0.342613	0.228601	0.0805866	0.0643139	0.929289	-62
ENSMUSG00000052609.9	Plekhg3	chr12	76572394	76572658	76572394	76572745	76573246	76573360	76573246	76573360	0.092964	0.0489846	0.0382727	0.0643317	0.929289	-88
ENSMUSG00000027829.15	Ccnl1	chr3	65951433	65951554	65951433	65951554	65952705	65952859	65952736	65952859	0.168825	0.046805	0.081762	0.0644334	0.929289	30
ENSMUSG00000040111.17	Gramd1b	chr9	40317512	40317593	40317512	40317593	40320543	40320920	40320413	40320920	0.0636206	0.0407184	0.011711	0.0645889	0.929289	-131
ENSMUSG00000036591.16	Arhgap21	chr2	20967622	20967720	20967622	20967720	20968486	20968523	20968479	20968523	0.055234	0.034753	0.012538	0.0646518	0.929289	-8
ENSMUSG00000015697.14	Setdb1	chr3	95346614	95346816	95346614	95346816	95346995	95347121	95346958	95347121	0.0452025	0.0153436	0.0200603	0.0646528	0.929289	-38
ENSMUSG00000032289.15	Thsd4	chr9	59988963	59989093	59988963	59989093	59997005	59997281	59994046	59997281	0.0561132	0.0341189	0	0.0647345	0.929289	-2960
ENSMUSG00000050954.15	Zfp169	chr13	48506906	48506993	48506906	48506993	48513386	48513394	48513294	48513394	0.246397	0.148505	0.0207813	0.0647666	0.929289	-93
ENSMUSG00000018906.14	P4ha2	chr11	54111020	54111082	54111020	54111171	54111422	54111563	54111422	54111563	0.0975195	0.0180422	0.0428141	0.0648057	0.929289	-90
ENSMUSG00000022843.17	Clcn2	chr16	20708633	20708767	20708633	20708767	20709101	20709315	20709076	20709315	0.0498139	0.0179307	0.022912	0.0649604	0.929289	-26
ENSMUSG00000063511.11	Snrnp70	chr7	45380716	45380818	45380716	45380818	45383124	45383184	45381824	45383184	0.206451	0.132529	0.0293634	0.0650317	0.929289	-1301
ENSMUSG00000029993.16	Nfu1	chr6	87020718	87020839	87020718	87020842	87023127	87023186	87023127	87023186	0.0548805	0.0175393	0.0254922	0.065046	0.929289	-4
ENSMUSG00000004768.14	Rab23	chr1	33723785	33724005	33723785	33724102	33724933	33725019	33724933	33725019	0.0347279	0.0211532	0	0.0650872	0.929289	-98
ENSMUSG00000021244.15	Ylpm1	chr12	85057221	85057302	85057221	85058253	85060262	85060314	85060262	85060314	0.0460598	0.0280649	0	0.0650935	0.929289	-952
ENSMUSG00000039765.15	Cc2d2a	chr5	43681764	43681803	43681764	43681964	43683099	43683201	43683099	43683201	0.071721	0.0459215	0.0179014	0.0651165	0.929289	-162
ENSMUSG00000039770.6	Ypel5	chr17	72848579	72848833	72848579	72849022	72849234	72850437	72849234	72850437	0.318182	0.168143	0.128565	0.0653162	0.929289	-190
ENSMUSG00000050323.14	Ndufaf6	chr4	11070253	11070322	11070253	11070322	11073186	11073243	11073143	11073243	0.0569262	0.0352797	0.0157848	0.0653577	0.929289	-44
ENSMUSG00000020821.17	Kif1c	chr11	70703267	70703344	70703267	70703349	70703698	70703803	70703698	70703803	0.0236729	0.00725716	0.0105401	0.0654695	0.929289	-6
ENSMUSG00000022389.15	Tef	chr15	81814943	81815261	81814943	81816058	81821198	81821256	81821198	81821256	0.0445715	0.0272622	0	0.0655846	0.929289	-798
ENSMUSG00000031995.9	St14	chr9	31106150	31106254	31106150	31106254	31106716	31106874	31106488	31106874	0.0281393	0.0159421	0.0108538	0.0658046	0.929289	-229
ENSMUSG00000024952.13	Rps6ka4	chr19	6838054	6838162	6838054	6838162	6839459	6839585	6839251	6839585	0.0190676	0.00365412	0.00809251	0.0658095	0.929289	-209
ENSMUSG00000061665.7	Cd2ap	chr17	42792951	42793027	42792951	42793027	42796203	42796369	42796196	42796369	0.127969	0.0693386	0.0522707	0.0658131	0.929289	-8
ENSMUSG00000045838.8	Ccdc9b	chr2	118761644	118761758	118761644	118761758	118762525	118762625	118762505	118762625	0.0350476	0.0175164	0.0149099	0.0658363	0.929289	-21
ENSMUSG00000037243.17	Zfp692	chr11	58307612	58307812	58307612	58307761	58307972	58308004	58307972	58308004	0.0245863	0.0150268	0	0.0660978	0.929289	50
ENSMUSG00000031818.12	Cox4i1	chr8	120668307	120668351	120668307	120668375	120669308	120669382	120669308	120669382	0.101176	0.0510574	0.0426306	0.0661648	0.929289	-25
ENSMUSG00000030557.17	Mef2a	chr7	67316791	67316982	67316791	67316982	67349868	67349921	67348417	67349921	0.00357695	0.00122568	0.00162375	0.0662395	0.929289	-1452
ENSMUSG00000042851.17	Zc3h6	chr2	128967401	128967650	128967401	128967836	128991090	128991271	128991090	128991271	0.0523517	0.0324192	0.00670586	0.0663522	0.929289	-187
ENSMUSG00000028292.14	Rars2	chr4	34614977	34615026	34614977	34615561	34618553	34618627	34618553	34618627	0.0227197	0.0140381	0	0.0663587	0.929289	-536
ENSMUSG00000039385.5	Cdh6	chr15	13060107	13060227	13060107	13060227	13064279	13064522	13064268	13064522	0.0157709	0.0099366	0.00220796	0.0663603	0.929289	-12
ENSMUSG00000026634.16	Angel2	chr1	190940873	190941295	190940873	190942247	190942829	190942887	190942829	190942887	0.109987	0.0679316	0.0166552	0.0664842	0.929289	-953
ENSMUSG00000025372.16	Baiap2	chr11	119957821	119957889	119957821	119960065	119960156	119960387	119960156	119960387	0.410757	0.218722	0.0465548	0.0666698	0.929289	-2177
ENSMUSG00000037447.16	Arid5a	chr1	36317203	36317324	36317203	36317662	36318083	36318132	36318083	36318132	0.0310939	0.0195737	0.00593199	0.0666952	0.929289	-339
ENSMUSG00000057411.9	Fam173a	chr17	25791571	25791676	25791571	25791676	25792001	25792077	25792052	25792077	0.0214062	0.0131473	0	0.0668482	0.929289	50
ENSMUSG00000043760.16	Pkhd1	chr1	20565598	20565877	20565598	20565877	20566757	20566872	20566686	20566872	0.0546721	0.0217741	0.0242015	0.0669435	0.929289	-72
ENSMUSG00000049382.10	Krt8	chr15	102003897	102004034	102003897	102004034	102004112	102004266	102004100	102004266	0.150275	0.0944814	0.0497594	0.0669812	0.929289	-13
ENSMUSG00000029101.16	Rgs12	chr5	35030020	35030090	35030020	35030220	35030467	35030621	35030467	35030621	0.0276541	0.00267292	0.011227	0.0671593	0.929289	-131
ENSMUSG00000026918.16	Brd3	chr2	27447842	27448034	27447842	27448034	27448399	27448580	27448377	27448580	0.513889	0.235777	0.207642	0.067161	0.929289	-23
ENSMUSG00000015016.8	Acsf3	chr8	122775577	122775628	122775577	122775590	122779945	122780635	122779945	122780635	0.230361	0.1094	0.0970932	0.0672006	0.929289	37
ENSMUSG00000028841.14	Cnksr1	chr4	134233285	134233387	134233285	134233387	134233701	134233764	134233472	134233764	0.121741	0.0488922	0.0590973	0.0672243	0.929289	-230
ENSMUSG00000002031.13	Ift46	chr9	44767332	44767532	44767332	44767673	44773063	44773173	44773063	44773173	0.330997	0.0933376	0.137766	0.0673509	0.929289	-142
ENSMUSG00000022537.18	Tmem44	chr16	30547342	30547469	30547342	30547469	30550362	30550528	30549392	30550528	0.374709	0.160625	0.156759	0.067592	0.929289	-971
ENSMUSG00000047126.17	Cltc	chr11	86737070	86737278	86737070	86737278	86757247	86757288	86757241	86757288	0.00253381	0.00156547	0	0.0676322	0.929289	-7
ENSMUSG00000039844.20	Rapgef1	chr2	29679132	29679260	29679132	29679269	29686104	29686182	29686104	29686182	0.0441879	0	0.0170486	0.0678612	0.929289	-10
ENSMUSG00000003161.15	Sri	chr5	8062383	8062427	8062383	8063000	8063259	8063407	8063259	8063407	0.0478408	0.0303762	0.014441	0.0679124	0.929289	-574
ENSMUSG00000039738.16	Slx4	chr16	4001200	4001678	4001200	4001678	4003731	4003752	4003557	4003752	0.156943	0.103295	0.0142821	0.0679149	0.929289	-175
ENSMUSG00000049555.10	Tmie	chr9	110867447	110867597	110867447	110867597	110870664	110870748	110870630	110870748	0.0617701	0.038729	0.0131509	0.0679193	0.929289	-35
ENSMUSG00000005417.17	Mprip	chr11	59757523	59758240	59757523	59761327	59764379	59764527	59764379	59764527	0.0206632	0.0128083	0.00672914	0.0681111	0.929289	-3088
ENSMUSG00000045098.19	Kmt5b	chr19	3804394	3804561	3804394	3804833	3804916	3805046	3804916	3805046	0.00999077	0.00619054	0	0.0681896	0.929289	-273
ENSMUSG00000029550.11	Sppl3	chr5	115074814	115074903	115074814	115074908	115082220	115082340	115082220	115082340	0.029319	0.0183683	0.0095555	0.0684993	0.929289	-6
ENSMUSG00000027782.10	Kpna4	chr3	69076749	69076844	69076749	69076844	69079376	69079539	69078914	69079539	0.0598558	0.0379206	0	0.0685761	0.929289	-463
ENSMUSG00000019850.11	Tnfaip3	chr10	19011515	19011790	19011515	19011790	19014401	19014582	19012996	19014582	0.189703	0.120092	0	0.0685909	0.929289	-1406
ENSMUSG00000025616.14	Usp16	chr16	87454984	87455215	87454984	87455102	87458640	87458742	87458640	87458742	0.0197346	0.0126226	0.00336718	0.0687279	0.929289	112
ENSMUSG00000023952.13	Gtpbp2	chr17	46161031	46161291	46161031	46161326	46163482	46163505	46163482	46163505	0.048773	0.0240685	0.0213864	0.0688127	0.929289	-36
ENSMUSG00000002307.16	Daxx	chr17	33912157	33912364	33912157	33912369	33912587	33912807	33912587	33912807	0.0174595	0.0108203	0	0.0688229	0.929289	-6
ENSMUSG00000068040.10	Tm9sf4	chr2	153188953	153189049	153188953	153189077	153190830	153190949	153190830	153190949	0.026194	0.0145313	0.0107063	0.0688458	0.929289	-29
ENSMUSG00000024293.16	Esco1	chr18	10588438	10588550	10588438	10588550	10595675	10595875	10593745	10595875	0.0861221	0.0451611	0.036559	0.0689241	0.929289	-1931
ENSMUSG00000024911.7	Fibp	chr19	5462389	5462632	5462389	5462706	5463170	5463304	5463170	5463304	0.127507	0.0803484	0	0.0689354	0.929289	-75
ENSMUSG00000026126.15	Ptpn18	chr1	34459776	34459844	34459776	34459916	34462701	34462810	34462701	34462810	0.101979	0.0276847	0.04524	0.0689732	0.929289	-73
ENSMUSG00000040046.14	Tph1	chr7	46660415	46660516	46660415	46660516	46662006	46662190	46661972	46662190	0.12863	0.0660746	0.0593316	0.0689958	0.929289	-35
ENSMUSG00000032038.7	St3gal4	chr9	35054739	35054782	35054739	35054782	35055209	35055282	35055197	35055282	0.00628341	0.00260825	0.00289463	0.0694212	0.929289	-13
ENSMUSG00000037669.15	Ldah	chr12	8208135	8208204	8208135	8208192	8220599	8220755	8220599	8220755	0.0783046	0.0504424	0.00746969	0.0694469	0.929289	11
ENSMUSG00000040123.17	Zmym5	chr14	56810739	56810859	56810739	56810859	56811386	56811464	56811333	56811464	0.0461753	0.0288178	0	0.0696672	0.929289	-54
ENSMUSG00000085396.7	Firre	chrX	50606962	50607104	50606962	50607104	50608515	50608604	50608470	50608604	0.20683	0.121564	0.0345762	0.06967	0.929289	-46
ENSMUSG00000000303.12	Cdh1	chr8	106604286	106604407	106604286	106604564	106649000	106649224	106649000	106649224	0.00340655	0.00218164	0.00047665	0.0696727	0.929289	-158
ENSMUSG00000021238.11	Aldh6a1	chr12	84441762	84441924	84441762	84441924	84443728	84443788	84442070	84443788	0.0410404	0.0256532	0	0.0698791	0.929289	-1659
ENSMUSG00000020788.15	Atp2a3	chr11	72972821	72972901	72972821	72972902	72972993	72973079	72972993	72973079	0.00519877	0.00325638	0	0.0698925	0.929289	-2
ENSMUSG00000053617.12	Sh3pxd2a	chr19	47272007	47272057	47272007	47272057	47273183	47273518	47272865	47273518	0.0153798	0.00988094	0.00217237	0.0700866	0.929289	-319
ENSMUSG00000031835.16	Mbtps1	chr8	119521754	119521911	119521754	119521911	119522478	119522594	119522382	119522594	0.0202471	0.0127236	0	0.0700913	0.929289	-97
ENSMUSG00000049775.16	Tmsb4x	chrX	167207936	167208051	167207936	167208051	167209007	167209149	167209105	167209149	0.000829907	0.000437806	0.000357508	0.0701072	0.929289	97
ENSMUSG00000039105.6	Atp6v1g1	chr4	63544771	63544843	63544771	63545286	63548584	63548685	63548584	63548685	0.142802	0.0986921	0.0312369	0.0702584	0.929289	-444
ENSMUSG00000040811.15	Eml2	chr7	19181236	19181285	19181236	19181355	19181708	19181737	19181708	19181737	0.153017	0.0827744	0.0647128	0.0702693	0.929289	-71
ENSMUSG00000026860.16	Sh3glb2	chr2	30345885	30345939	30345885	30345939	30346356	30346453	30346058	30346453	0.111837	0.0580512	0.0474869	0.0702826	0.929289	-299
ENSMUSG00000027993.16	Trim2	chr3	84178074	84178178	84178074	84178178	84190512	84190523	84190423	84190523	0.0662585	0.0418513	0	0.0703202	0.929289	-90
ENSMUSG00000000489.7	Pdgfb	chr15	80003324	80003414	80003324	80003414	80005472	80005565	80005468	80005565	0.0451976	0.0290279	0.00843045	0.0703578	0.929289	-5
ENSMUSG00000026278.14	Bok	chr1	93685701	93685854	93685701	93685946	93686417	93686669	93686417	93686669	0.0336526	0.0212771	0	0.0707277	0.929289	-93
ENSMUSG00000032086.12	Bace1	chr9	45839917	45840042	45839917	45852140	45852887	45852976	45852887	45852976	0.217982	0.117164	0.0906612	0.0707578	0.929289	-12099
ENSMUSG00000053644.13	Aldh7a1	chr18	56562032	56562204	56562032	56562204	56562482	56562675	56562445	56562675	0.0162392	0.0102503	0	0.0708692	0.929289	-38
ENSMUSG00000058407.12	Txndc9	chr1	37995632	37995841	37995632	37995841	37997108	37997224	37996892	37997224	0.126619	0.0183055	0.0514961	0.0709784	0.929289	-217
ENSMUSG00000036748.16	Cuedc2	chr19	46332617	46332698	46332617	46332698	46338568	46338608	46338312	46338608	0.308227	0.155254	0.14228	0.0711259	0.929289	-257
ENSMUSG00000024236.18	Svil	chr18	4920839	4920874	4920839	4921611	4971089	4971135	4971089	4971135	0.0268127	0.0115136	0.0123439	0.0714496	0.929289	-738
ENSMUSG00000021546.18	Hnrnpk	chr13	58400341	58400417	58400341	58400417	58402392	58402464	58402388	58402464	0.000978802	0.000589035	0.000369238	0.0714577	0.929289	-5
ENSMUSG00000022961.18	Son	chr16	91671348	91671465	91671348	91675308	91675400	91675548	91675400	91675548	0.0195482	0.00236729	0.00834126	0.071497	0.929289	-3844
ENSMUSG00000029202.12	Pds5a	chr5	65696762	65696937	65696762	65696937	65697548	65697682	65697553	65697682	0.240224	0.116987	0.110084	0.0715557	0.929289	4
ENSMUSG00000036617.17	Etl4	chr2	20805774	20807368	20805774	20807373	20807901	20808024	20807901	20808024	0.0300925	0.00239869	0.012261	0.0715636	0.929289	-6
ENSMUSG00000001891.16	Ugp2	chr11	21323198	21323303	21323198	21323303	21329034	21329113	21328870	21329113	0.0146331	0.00925715	0	0.0715703	0.929289	-165
ENSMUSG00000020196.10	Cabin1	chr10	75755368	75755500	75755368	75755500	75764024	75764270	75764013	75764270	0.0552588	0.0214798	0.0251292	0.0716028	0.929289	-12
ENSMUSG00000020074.7	Ccar1	chr10	62790920	62791042	62790920	62791042	62792215	62792229	62792141	62792229	0.0217087	0.0138041	0.00184488	0.0716071	0.929289	-75
ENSMUSG00000095562.8	Erdr1	chrX	170009821	170009906	170009821	170010021	170010673	170011063	170010673	170011063	0.216239	0.133151	0.0571399	0.0718045	0.929289	-116
ENSMUSG00000040350.16	Trim7	chr11	48838836	48838932	48838836	48840480	48845435	48845547	48845435	48845547	0.0476985	0	0.0193812	0.0718525	0.929289	-1549
ENSMUSG00000031012.17	Cask	chrX	13682970	13683048	13682970	13683048	13714665	13714738	13714538	13714738	0.0136692	0.00868106	0	0.0718745	0.929289	-128
ENSMUSG00000032652.13	Crebl2	chr6	134851079	134851222	134851079	134851224	134852277	134852314	134852277	134852314	0.0223529	0.0141774	0	0.072122	0.929289	-3
ENSMUSG00000033732.10	Sf3b3	chr8	110826094	110826246	110826094	110826246	110831483	110831556	110829518	110831556	0.083102	0.0194497	0.0393519	0.0721453	0.929289	-1966
ENSMUSG00000049076.12	Acap2	chr16	31141738	31141797	31141738	31141797	31153707	31153759	31153705	31153759	0.00720906	0.0045775	0	0.0721515	0.929289	-3
ENSMUSG00000021611.9	Tert	chr13	73634151	73634347	73634151	73634541	73635419	73635600	73635419	73635600	0.0755735	0.0323887	0.0364122	0.0721879	0.929289	-195
ENSMUSG00000050891.10	Tatdn1	chr15	58905740	58905811	58905740	58905811	58909576	58909649	58909572	58909649	0.10851	0.0516858	0.0489003	0.072204	0.929289	-5
ENSMUSG00000052752.15	Traf7	chr17	24512246	24512386	24512246	24512386	24512949	24513084	24512790	24513084	0.029371	0	0.0119998	0.0723378	0.929289	-160
ENSMUSG00000054199.17	Gon4l	chr3	88869802	88869843	88869802	88869869	88875906	88875930	88875906	88875930	0.0337924	0	0.0138579	0.0723597	0.929289	-27
ENSMUSG00000071796.13	6820431F20Rik	chr8	20277875	20278170	20277875	20278170	20283172	20283266	20283104	20283266	0.0176346	0.0113989	0.00535271	0.0723803	0.929289	-69
ENSMUSG00000068876.16	Cgn	chr3	94762981	94763100	94762981	94763100	94763188	94763271	94763187	94763271	0.00444396	0.00262334	0.00175243	0.0724684	0.929289	-2
ENSMUSG00000024811.11	Tnks2	chr19	36867639	36867718	36867639	36867719	36871612	36871758	36871612	36871758	0.00833128	0.00258787	0.00389303	0.0725211	0.929289	-2
ENSMUSG00000071793.12	2610005L07Rik	chr8	20405124	20405419	20405124	20405419	20410424	20410565	20410356	20410565	0.0295246	0.0185648	0.0101239	0.0725631	0.929289	-69
ENSMUSG00000071337.11	Tia1	chr6	86418877	86418932	86418877	86419133	86420323	86420411	86420323	86420411	0.103966	0.0638865	0.0390655	0.0727237	0.929289	-202
ENSMUSG00000044734.16	Serpinb1a	chr13	32847389	32847507	32847389	32847507	32848618	32848756	32848408	32848756	0.00609725	0.00389398	0	0.0729113	0.929289	-211
ENSMUSG00000029761.16	Cald1	chr6	34745618	34746015	34745618	34746639	34747891	34747969	34747891	34747969	0.087145	0.0408862	0.0410582	0.0729485	0.929289	-625
ENSMUSG00000020196.10	Cabin1	chr10	75738210	75738363	75738210	75738363	75739346	75739513	75739325	75739513	0.0180009	0.0114805	0	0.0730039	0.929289	-22
ENSMUSG00000055371.17	Stam2	chr2	52709678	52709690	52709678	52709690	52714845	52715004	52714817	52715004	0.00781828	0.0049904	0	0.0730123	0.929289	-29
ENSMUSG00000026277.14	Stk25	chr1	93624552	93624624	93624552	93624624	93625033	93625148	93624930	93625148	0.0134332	0.00794076	0.0053572	0.0731918	0.929289	-104
ENSMUSG00000041189.9	Chrnb1	chr11	69793957	69793992	69793957	69793992	69794149	69794259	69794100	69794259	0.03868	0.0229467	0.0153645	0.0732253	0.929289	-50
ENSMUSG00000060073.9	Psma3	chr12	70978732	70978815	70978732	70978839	70983318	70983442	70983318	70983442	0.0102467	0.00216955	0.00461305	0.073258	0.929289	-25
ENSMUSG00000034248.7	Slc25a37	chr14	69247580	69247637	69247580	69247637	69249393	69249622	69248882	69249622	0.146246	0.0746663	0.0683936	0.0733285	0.929289	-512
ENSMUSG00000030516.14	Tjp1	chr7	65297503	65297667	65297503	65297667	65299729	65299813	65299708	65299813	0.079419	0.0503124	0.0198062	0.0733939	0.929289	-22
ENSMUSG00000021559.14	Dapk1	chr13	60760634	60761863	60760634	60761884	60762356	60762802	60762356	60762802	0.169153	0.044611	0.0846238	0.0737546	0.929289	-22
ENSMUSG00000029166.14	Mapre3	chr5	30862497	30862643	30862497	30863405	30864573	30864728	30864573	30864728	0.0767363	0.0380158	0.0347183	0.0738341	0.929289	-763
ENSMUSG00000022283.15	Pabpc1	chr15	36601314	36601409	36601314	36601409	36602845	36602985	36602647	36602985	0.000446128	0.000293886	7.2922e-05	0.0738449	0.929289	-199
ENSMUSG00000062822.8	4833420G17Rik	chr13	119473832	119473956	119473832	119474194	119474832	119474924	119474832	119474924	0.0940812	0.0189844	0.0437269	0.0739107	0.929289	-239
ENSMUSG00000025145.13	Lrrc45	chr11	120718441	120718553	120718441	120719132	120719465	120719558	120719465	120719558	0.062389	0.0398411	0.0192357	0.074132	0.929289	-580
ENSMUSG00000026414.13	Tnnt2	chr1	135840698	135841911	135840698	135842026	135845554	135845644	135845554	135845644	0.262147	0.138178	0.118617	0.0742149	0.929289	-116
ENSMUSG00000019850.11	Tnfaip3	chr10	19004456	19005331	19004456	19005331	19005695	19005731	19005550	19005731	0.00875904	0.00562226	0	0.0742341	0.929289	-146
ENSMUSG00000028249.15	Sdcbp	chr4	6365708	6365759	6365708	6365921	6377076	6377142	6377076	6377142	0.0123833	0.00344941	0.00583903	0.0744006	0.929289	-163
ENSMUSG00000022231.10	Sema5a	chr15	32245102	32245608	32245102	32246030	32347219	32347316	32347219	32347316	0.30013	0.18353	0.0248604	0.0744999	0.929289	-423
ENSMUSG00000039536.16	Stau1	chr2	166951270	166951346	166951270	166951346	166952247	166952472	166952098	166952472	0.172662	0.0984138	0.0697931	0.0745134	0.929289	-150
ENSMUSG00000038005.15	Hpf1	chr8	60896737	60896836	60896737	60897043	60900083	60900234	60900083	60900234	0.0130924	0.00846523	0	0.0748991	0.929289	-208
ENSMUSG00000022452.16	Smdt1	chr15	82346013	82346220	82346013	82346269	82347899	82348040	82347899	82348040	0.0287679	0.018735	0.00920728	0.0749461	0.929289	-50
ENSMUSG00000090841.2	Myl6	chr10	128492452	128492535	128492452	128492535	128493538	128493566	128492709	128493566	0.331143	0.251775	0	0.0749479	0.929289	-830
ENSMUSG00000034259.8	Exosc4	chr15	76327590	76327812	76327590	76327663	76329029	76329095	76329029	76329095	0.0779404	0.0504917	0.0189827	0.0751098	0.929289	148
ENSMUSG00000026414.13	Tnnt2	chr1	135840698	135841911	135840698	135842026	135843784	135843814	135843784	135843814	0.18205	0.0967676	0.080411	0.075123	0.929289	-116
ENSMUSG00000026303.6	Mlph	chr1	90921844	90921978	90921844	90922043	90927982	90928204	90927982	90928204	0.0194426	0.00725068	0.0092445	0.0752861	0.929289	-66
ENSMUSG00000024940.11	Ltbp3	chr19	5756583	5756704	5756583	5756712	5756793	5756824	5756793	5756824	0.0145964	0.00845679	0.00608619	0.0753792	0.929289	-9
ENSMUSG00000075302.10	Erich2	chr2	70508830	70509544	70508830	70509565	70509655	70509701	70509655	70509701	0.216295	0.124447	0.0916182	0.0754454	0.929289	-22
ENSMUSG00000028960.20	Ube4b	chr4	149329675	149329737	149329675	149329737	149330190	149330337	149330069	149330337	0.0644075	0.0409109	0.0236897	0.0754546	0.929289	-122
ENSMUSG00000036591.16	Arhgap21	chr2	20892084	20892177	20892084	20892177	20912276	20912301	20912167	20912301	0.00471497	0	0.00194828	0.0755036	0.929289	-110
ENSMUSG00000026031.15	Cflar	chr1	58713570	58713657	58713570	58713659	58726305	58726732	58726305	58726732	0.0109513	0.00619578	0.00468424	0.0755395	0.929289	-3
ENSMUSG00000021764.8	Ndufs4	chr13	114351447	114351526	114351447	114351526	114387958	114388049	114387629	114388049	0.00699884	0.00466131	0.00145049	0.0756206	0.929289	-330
ENSMUSG00000032316.8	Clk3	chr9	57761715	57761867	57761715	57761867	57765073	57765093	57765036	57765093	0.0228933	0.0129532	0.00979112	0.0757053	0.929289	-38
ENSMUSG00000021282.17	Eif5	chr12	111539070	111539882	111539070	111539687	111540129	111540302	111540129	111540302	0.040372	0.0265185	0.0010109	0.0760703	0.929289	194
ENSMUSG00000029621.14	Arpc1a	chr5	145101056	145101269	145101056	145102372	145104441	145104517	145104441	145104517	0.0379304	0.00414506	0.0167146	0.0760766	0.929289	-1104
ENSMUSG00000039294.14	Cybc1	chr11	121228327	121228470	121228327	121228470	121229212	121229223	121229038	121229223	0.111134	0.07002	0	0.0761223	0.929289	-175
ENSMUSG00000026355.11	Mcm6	chr1	128355512	128355659	128355512	128355659	128359514	128359647	128359458	128359647	0.0146377	0.00960463	0.00118742	0.0761883	0.929289	-57
ENSMUSG00000054611.17	Kdm2a	chr19	4320897	4321056	4320897	4321056	4322386	4322548	4322382	4322548	0.0159694	0.00901591	0.0068764	0.0763689	0.929289	-5
ENSMUSG00000028081.6	Rps3a1	chr3	86141697	86141801	86141697	86141801	86142083	86142283	86142244	86142283	0.0758333	0.0187639	0.0368179	0.0766885	0.929289	160
ENSMUSG00000022475.19	Hdac7	chr15	97808352	97808533	97808352	97808533	97808966	97809058	97808659	97809058	0.112073	0.0698634	0.0389372	0.0766897	0.929289	-308
[truncated: 15,204 more rows]

## Sheet: Alternative 3-prime
Ensembl	genename	chr	evpos 0	evpos 1	evpos 2	evpos 3	evpos 4	evpos 5	evpos 6	evpos 7	delta psi	std KPC-K700E	std KPC	pval	fdr	distance	left	right
[truncated: 21,836 more rows]

[truncated: 1 more sheets: Alternative splice events (Hs)]
