# Supplementary material for: Mutant SF3B1 promotes malignancy in PDAC
Source: eLife. 2023 Oct 12;12:e80683. doi: 10.7554/eLife.80683 (PMC10629822; doi:10.7554/eLife.80683)
Supplement: Supplementary file 3. [file elife-80683-supp3.xlsx]

## Sheet: Primer List
Primer List
Use	Name	Sequence	Comment
qPCR	Mm_Tnc_Fw	GAGACCTGACACGGAGTATGAG	EMT genes
qPCR	Mm_Tnc_Rev	CTCCAAGGTGATGCTGTTGTCTG	EMT genes
qPCR	Mm_Col5a3_Fw	CCAGACAACAGCAGCTACCA	EMT genes
qPCR	Mm_Col5a3_Rev	CAAAGAGGGTCTTCGCCTGT	EMT genes
qPCR	Mm_Crlf1_Fw	CCTCTTCCAAGCCAAGTACCAG	EMT genes
qPCR	Mm_Crlf1_Rev	CTTGGACGAAGTAAACGGTGCC	EMT genes
qPCR	Mm_Col3a1_Fw	GACCAAAAGGTGATGCTGGACAG	EMT genes
qPCR	Mm_Col3a1_Rev	CAAGACCTCGTGCTCCAGTTAG	EMT genes
qPCR	Mm_Itgb3_Fw	GTGAGTGCGATGACTTCTCCTG	EMT genes
qPCR	Mm_Itgb3_Rev	CAGGTGTCAGTGCGTGTAGTAC	EMT genes
qPCR	Mm_Sfrp1_Fw	CAATACCACGGAAGCCTCTAAGC	EMT genes
qPCR	Mm_Sfrp1_Rev	TGGCCTCTGACTTCAACTCG	EMT genes
qPCR	Mm_Col1a1_Fw	CCTCAGGGTATTGCTGGACAAC	EMT genes
qPCR	Mm_Col1a1_Rev	CAGAAGGACCTTGTTTGCCAGG	EMT genes
qPCR	Mm_Igfbp4_Fw	CGGAGCAAGATGAAGATCGTGG	EMT genes
qPCR	Mm_Igfbp4_Rev	GATGAAGAGGTCTTCGTGGGTAC	EMT genes
qPCR	Mm_Loxl2_Fw	TTCTGCCTGGAGGACACTGAGT	EMT genes
qPCR	Mm_Loxl2_Rev	TCGGTGATGTCTATCCACTGGC	EMT genes
qPCR	Mm_Col1a2_Fw	TTCTGTGGGTCCTGCTGGGAAA	EMT genes
qPCR	Mm_Col1a2_Rev	TTGTCACCTCGGATGCCTTGAG	EMT genes
qPCR	Mm_Col7a1_Fw	CAGGCATTGGTGCCAGTGAACA	EMT genes
qPCR	Mm_Col7a1_Rev	TGGACCTCCATCCTCACAGTCA	EMT genes
qPCR	Mm_Inhba_Fw	ACCGAACTCTACACTCGGGA	EMT genes
qPCR	Mm_Inhba_Rev	CAGCAAGGGCAACTTCGTTT	EMT genes
qPCR	Mm_Fstl1_Fw	CTGTCTGATGAGAACGCTGACTG	EMT genes
qPCR	Mm_Fstl1_Rev	AGACACAGCGATTGCAGTCCAC	EMT genes
qPCR	Mm_Mmp2_Fw	CAAGGATGGACTCCTGGCACAT	EMT genes
qPCR	Mm_Mmp2_Rev	TACTCGCCATCAGCGTTCCCAT	EMT genes
qPCR	Mm_Lama1_Fw	TGTCTGCAAGCCAGGAGCTACA	EMT genes
qPCR	Mm_Lama1_Rev	GAGACAGAACGGCATCACCAAC	EMT genes
qPCR and isoform detection	Mm_Map3k7_Fw	GATGGAATATGCAGAGGGGG	Map3k7 canonical isoform: 114 bp
qPCR and isoform detection	Mm_Map3k7_Rev	CACTCCTTGGGAACACTGTA	Map3k7 non-canonical isoform: 137 bp
Isoform detection	hs_MAP3K7_Fw	GCTTTATGGAGCCTGCTTGAATC	MAP3K7 canonical isoform: 94 bp
Isoform detection	hs_MAP3K7_Rev	CAATGGTTCAGCACCATGC	MAP3K7 non-canonical isoform: 114 bp
