# Supplementary figures and images for: Mutant SF3B1 promotes malignancy in PDAC
Source: eLife journal article supplement (doi:10.7554/elife.80683), 2023-10-12

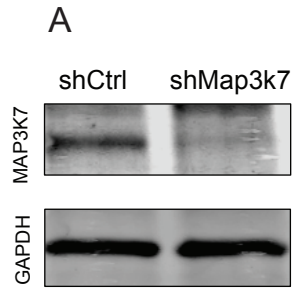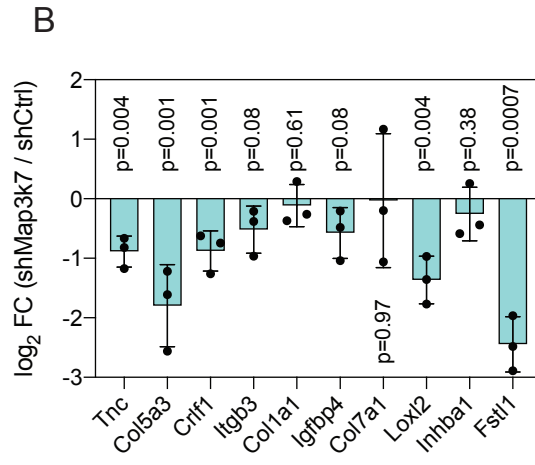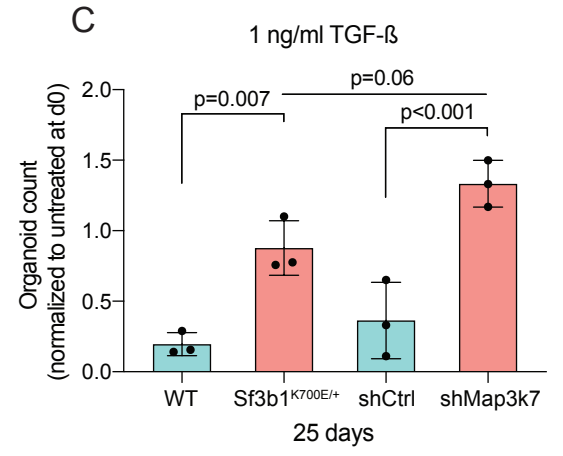

Supplement: supp [file elife-80683-supp-v2.zip]

A

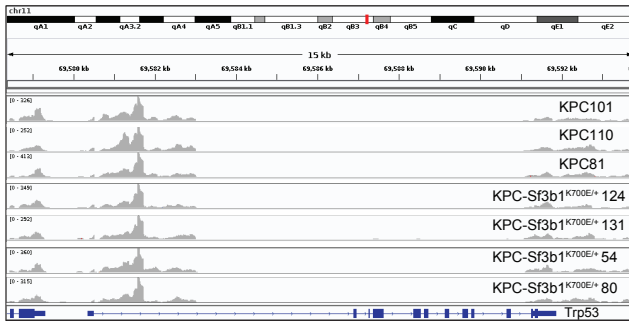

B

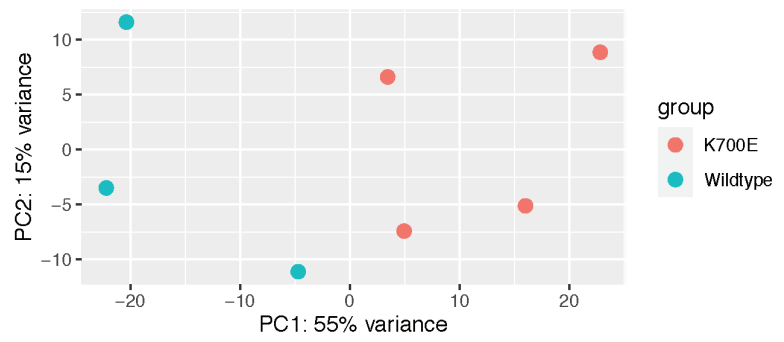

C

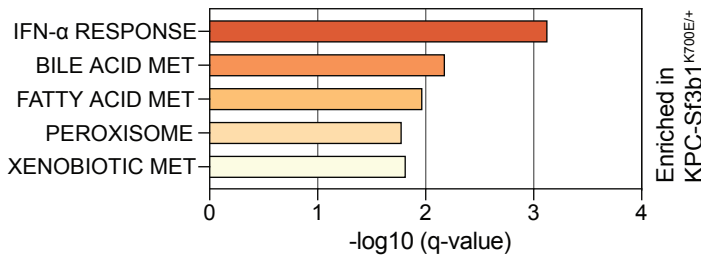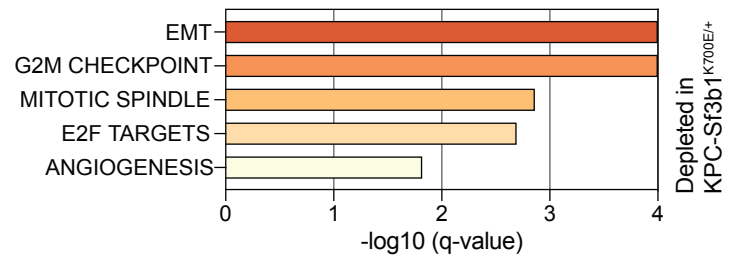

D

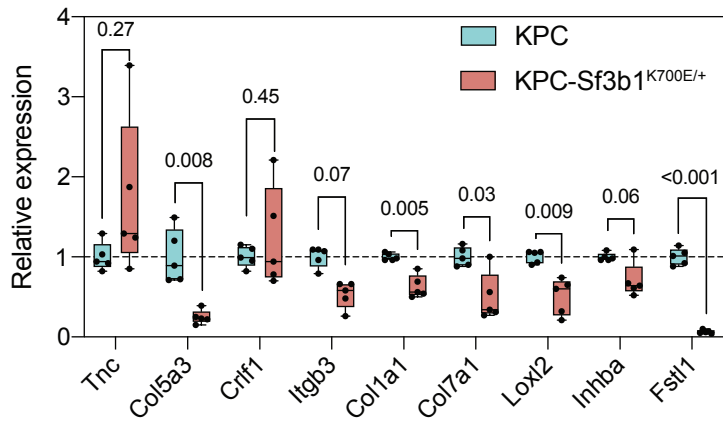

E

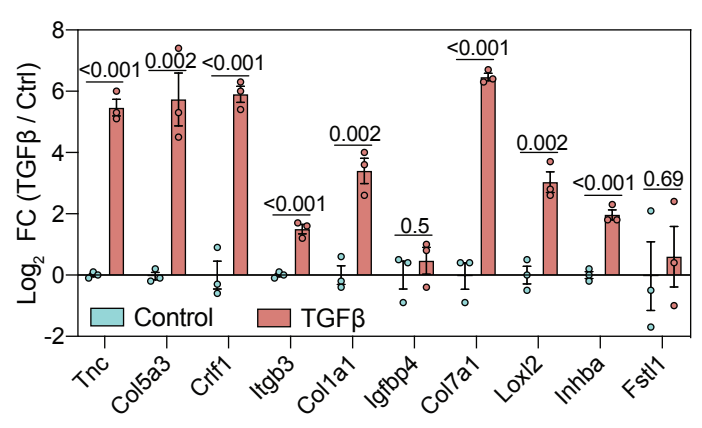

F

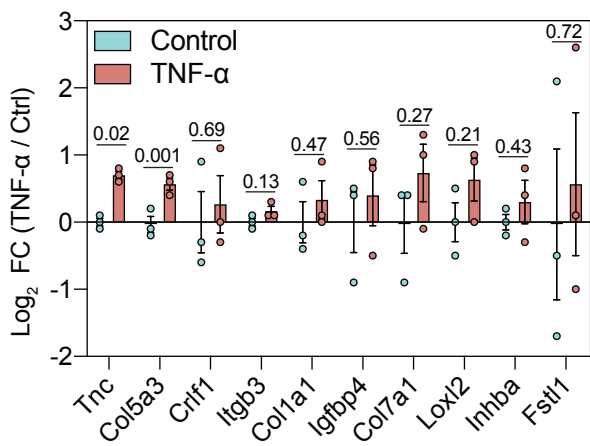

G

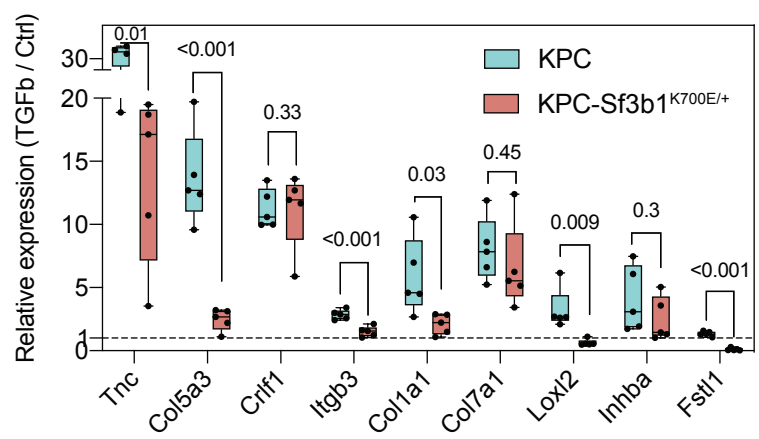

Supplement: supp [file elife-80683-supp-v2.zip]

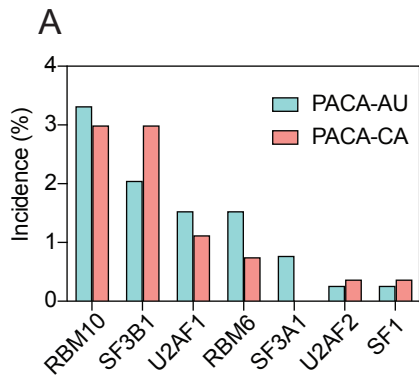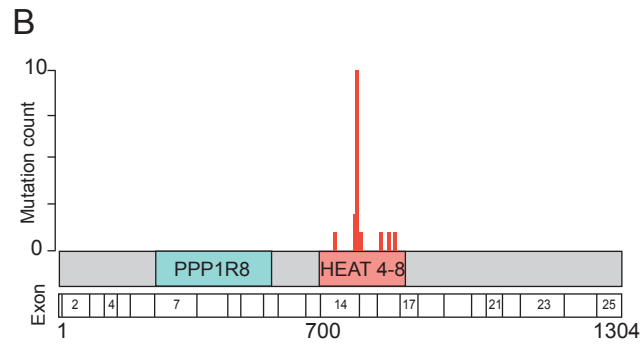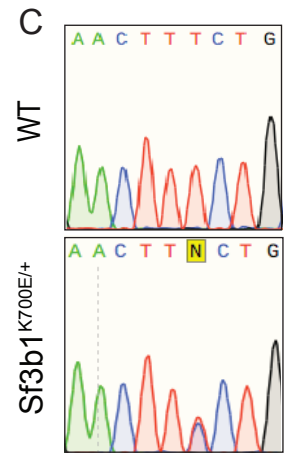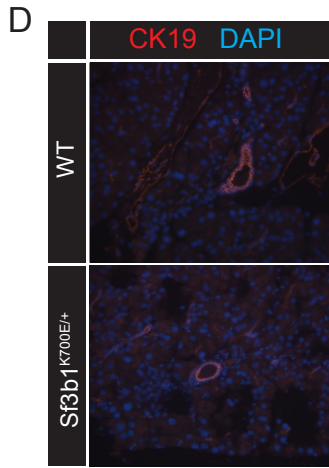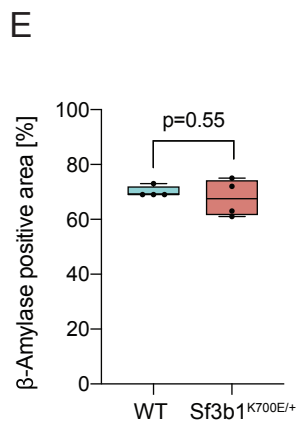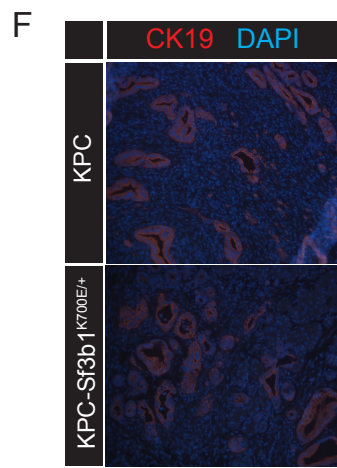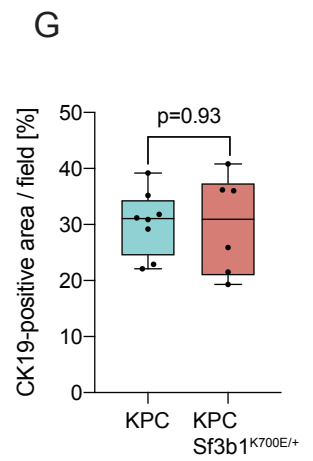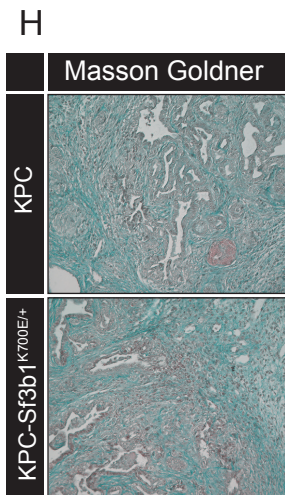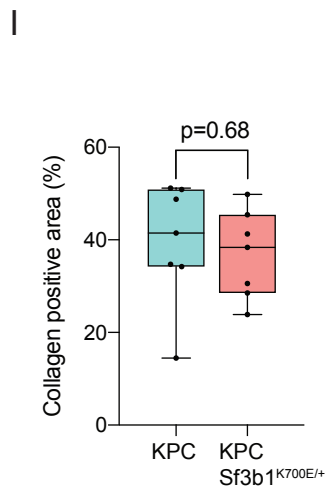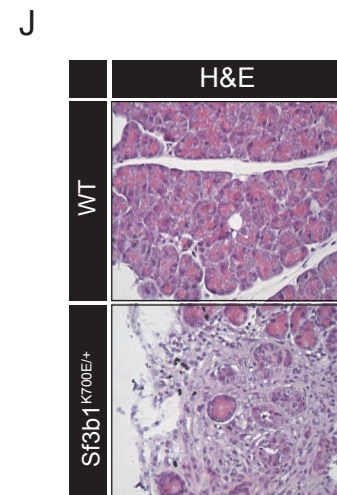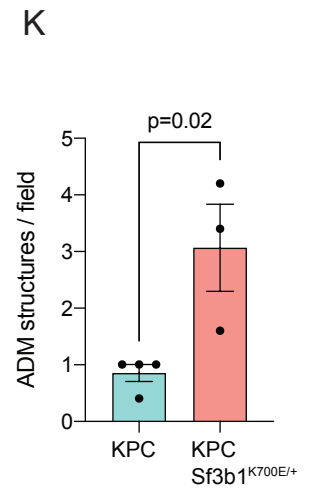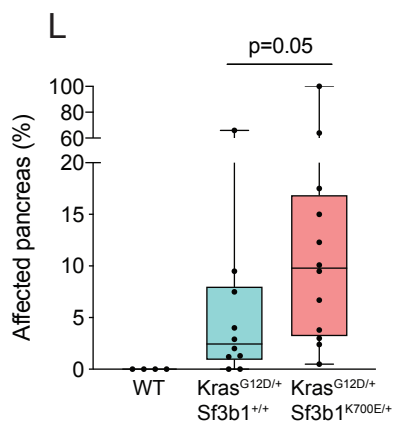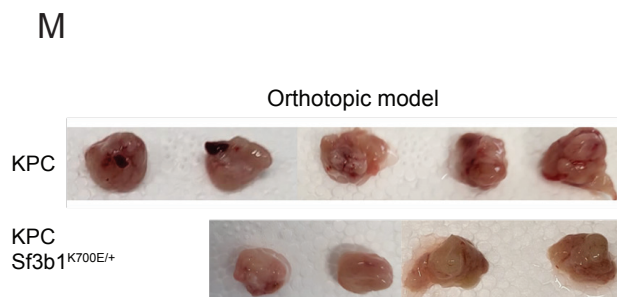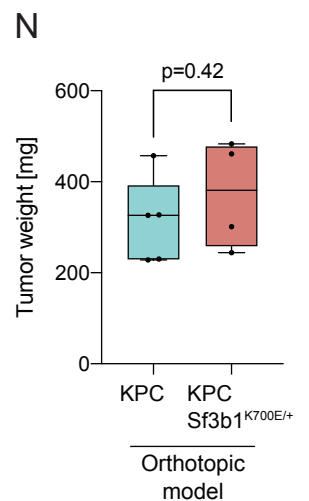

Supplement: supp [file elife-80683-supp-v2.zip]

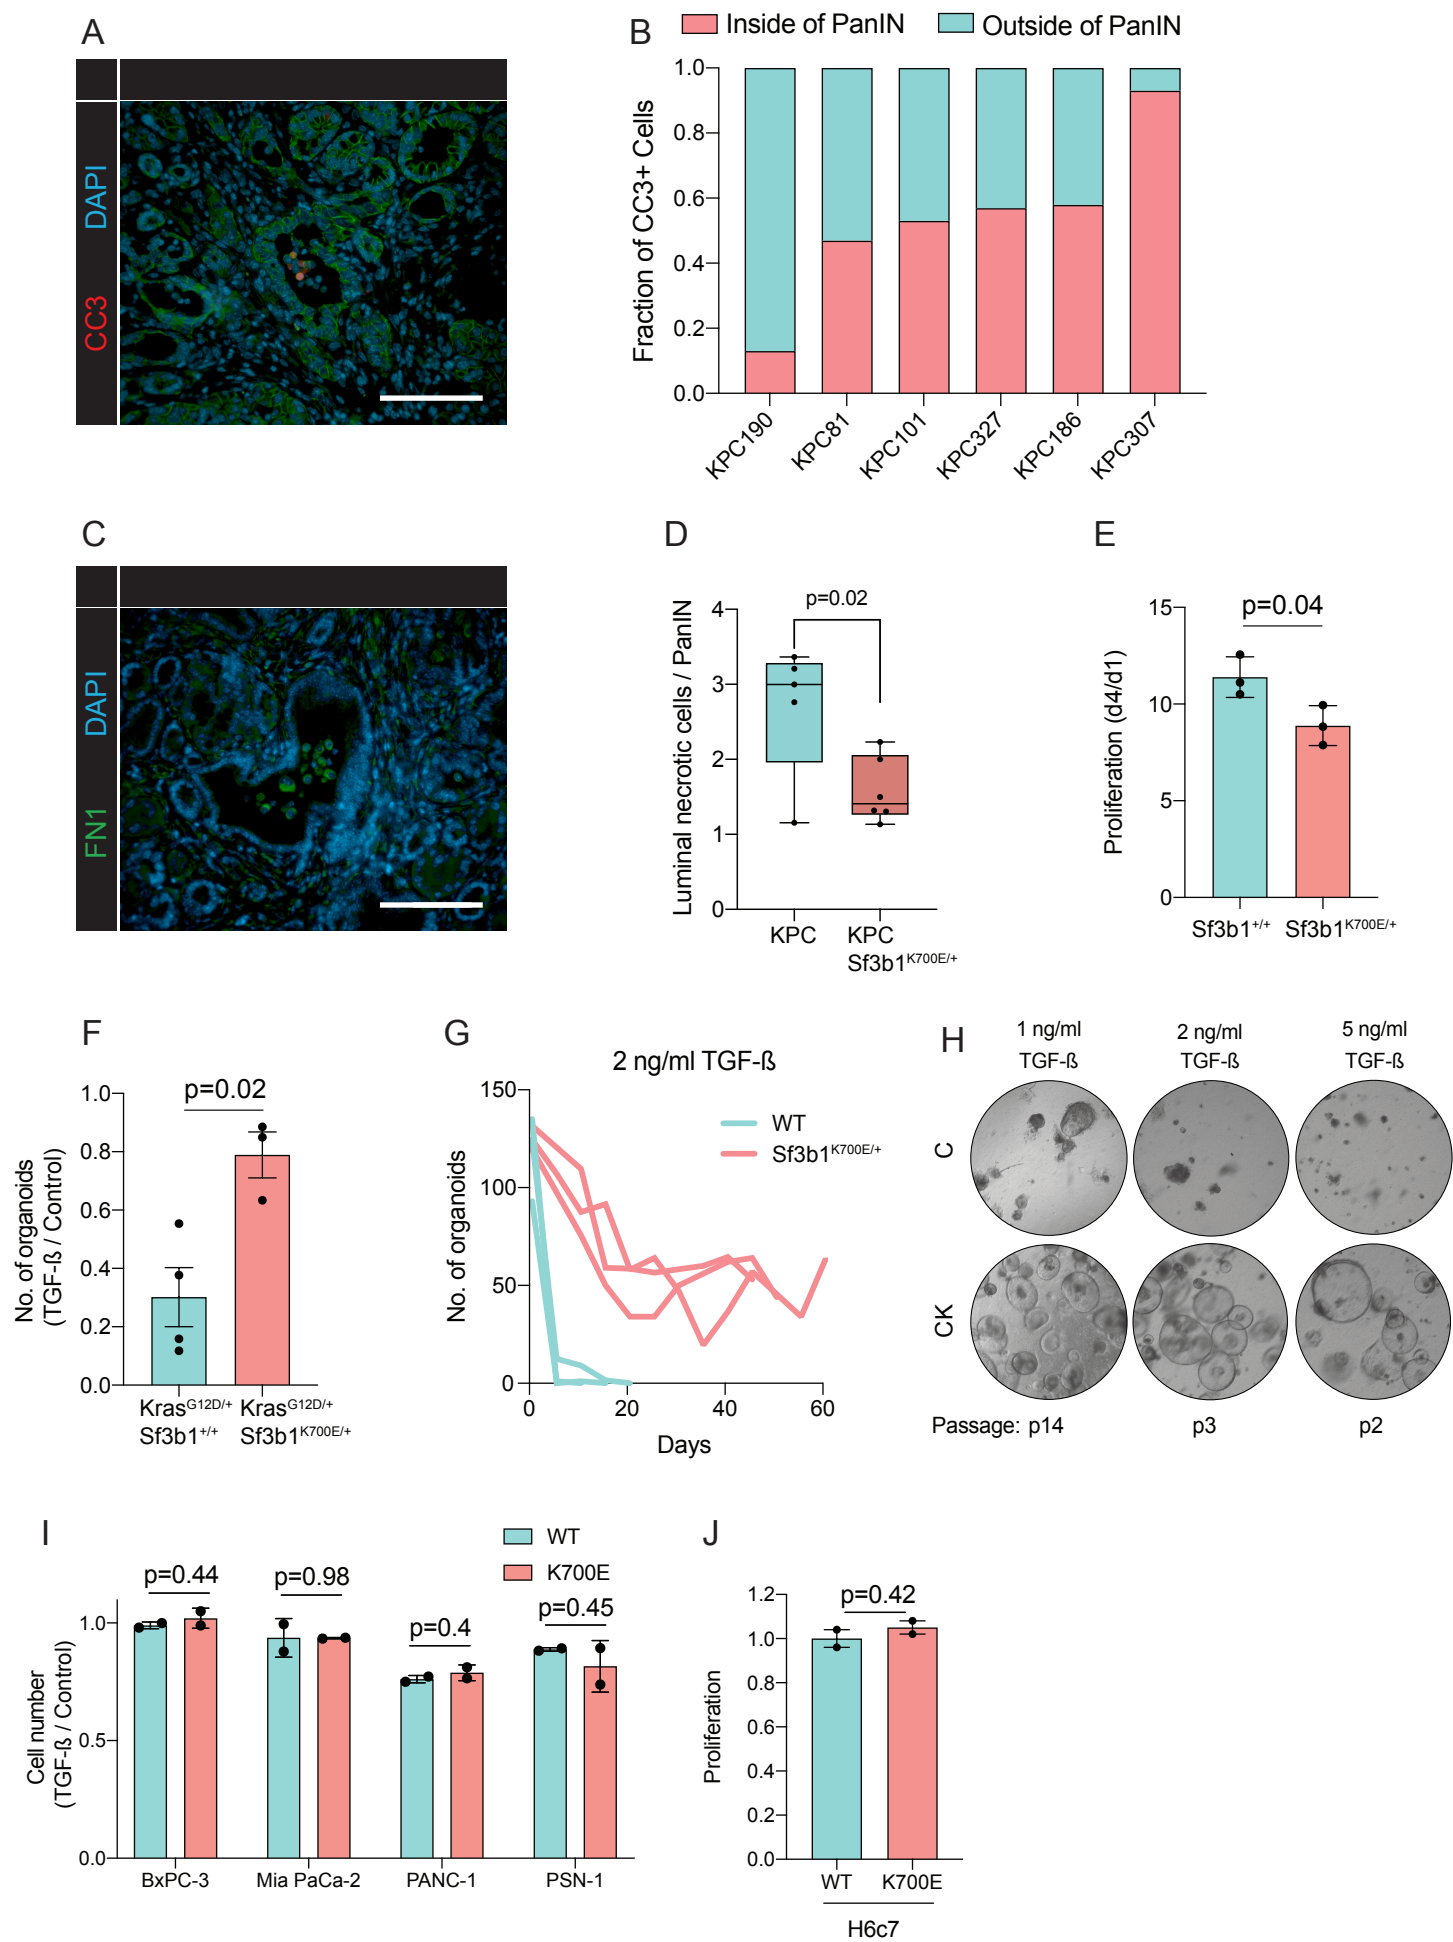

Supplement: supp [file elife-80683-supp-v2.zip]

A

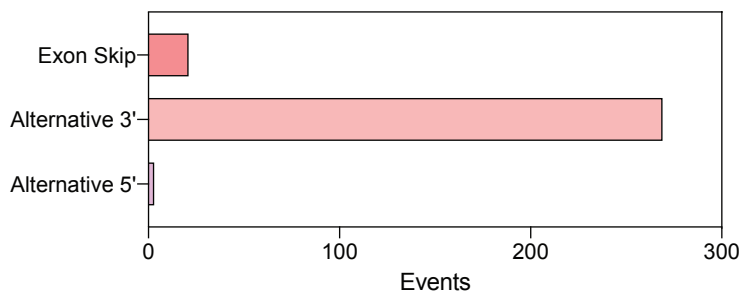

B

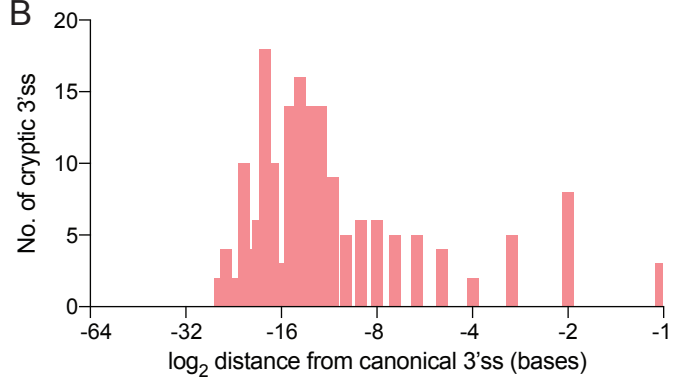

C

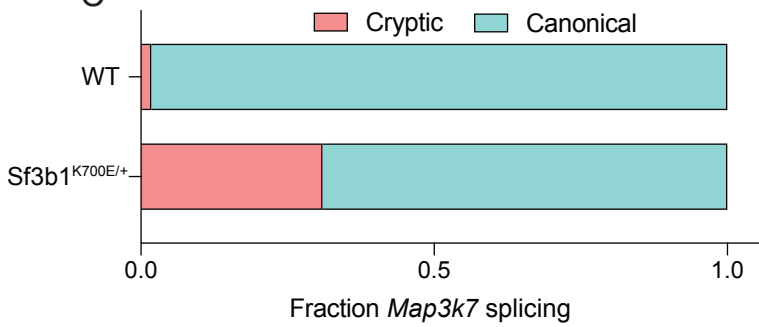

D

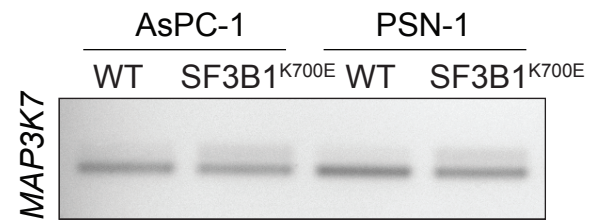

E

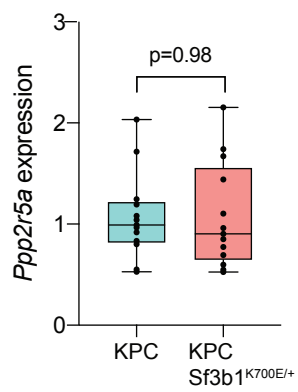

F

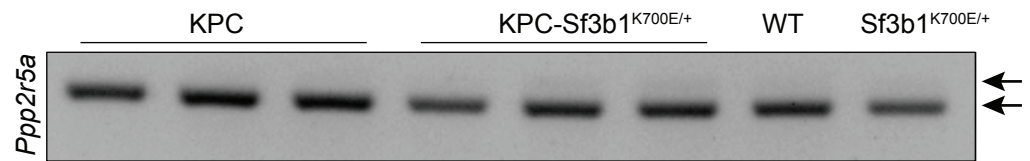

Supplement: supp [file elife-80683-supp-v2.zip]
